# Supplementary material for: Synthesis of indene-fused spiro-dibenz(ox)azepines via Rh(iii)-catalyzed cascade regioselective C–H activation/annulation
Source: Royal Society of Chemistry journal article supplement (doi:10.1039/d3cc01416a), 2023-01-01

## Supporting Information

### Synthesis of Indene-fused Spiro-Dibenz(ox)azepines via Rh(III)-Catalyzed Cascade Regioselective C–H Activation/Annulation

#### Table of contents

|                                                                                   |           |
|-----------------------------------------------------------------------------------|-----------|
| <b>General Information</b>                                                        | S2        |
| <b>General Procedure for the Preparation of Starting Materials</b>                | S3 – S5   |
| <b>General Procedure for Spirocyclization (Milligram and Gram scale reaction)</b> | S6        |
| <b>Mechanistic Experiments</b>                                                    | S7 – S10  |
| <b>General Procedure for the Preparation of the Rhodacycle Complex (Rh-1b)</b>    | S10 – S12 |
| <b>Procedure for the Treatment of the Rhodacycle Complex Rh-1b as Catalyst</b>    | S12       |
| <b>Procedure for the Treatment of the Rhodacycle Complex Rh-1b as Substrate</b>   | S12 – S13 |
| <b>References</b>                                                                 | S13       |
| <b>Table S1: Additional Optimization of Reaction Conditions</b>                   | S14       |
| <b>Unsuccessful Substrate and Coupling Partner</b>                                | S14       |
| <b>Characterization of spirocyclized products</b>                                 | S15 – S40 |
| <b><sup>1</sup>H, <sup>13</sup>C and <sup>19</sup>F NMR spectra of compounds</b>  | S41 – S96 |

## General Information:

All reactions were carried out in oven-dried reaction vessels under air atmosphere unless otherwise mentioned. TLC analysis was performed on silica gel TLC plates. Column chromatography was done using 230–400 mesh silica gel by applying pressure through an air pump.  $^1\text{H}$  and  $^{13}\text{C}$  NMR spectra were recorded on 400 MHz spectrometer and are reported as chemical shifts ( $\delta$ ) in parts per million (ppm), and multiplicities are abbreviated as s = singlet, d = doublet, t = triplet, q = quartet, m = multiplet, comp = complex. Internal standards or residual solvent signals were used as references. HRMS (m/z) was recorded using ESI (Q-Tof, positive ion) and Orbitrap (positive ion) mass spectrometry. Melting points were determined in a capillary melting point apparatus and are uncorrected. Single-crystal X-ray diffraction data were collected on Bruker D8 Venture with microfocus optics using Cu K $\alpha$  radiation. The CIF files were submitted to **CCDC (2226411-2226415 and 2242551)** and can be obtained at <https://summary.ccdc.cam.ac.uk/structure-summary-form>. Dibenzoxazepines<sup>1</sup> and alkynones<sup>2</sup> were prepared following literature methods. Single crystals of the spirocyclized compounds were obtained by taking 5-10 mg of the sample in 5 mL vials using a bi-solvent system applying the solvent diffusion technique. The choice of solvent systems and method for crystal growth for each compound (**3a**, **3o**, **3x**, **4o**, **4v**, **Rh-1b**) are provided in the characterization data section.

## 1. General Procedure for the Preparation of Staring Materials:

### (a) Preparation of Directing Group:

The corresponding heterocyclic dibenzo-azepine were synthesized in 2 steps from the substituted anilines **SI1** by following a general literature procedure.<sup>[1a-b]</sup>

#### *Schematic representation for the preparation of dibenzo-azepine:*

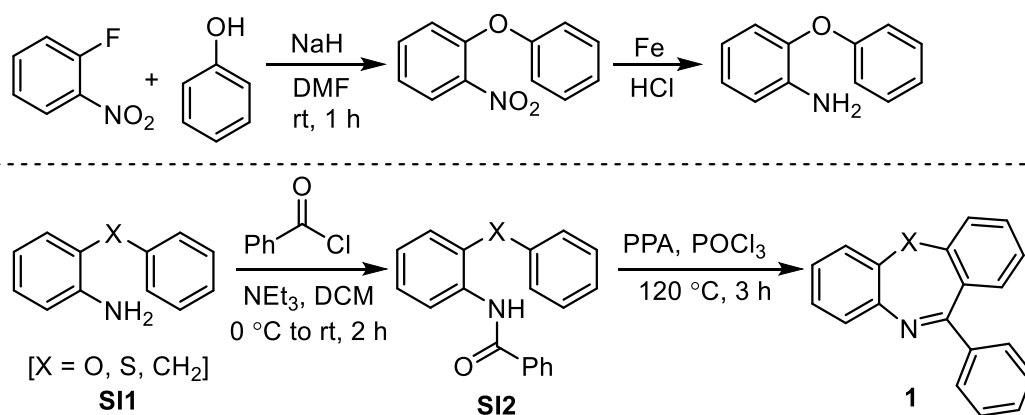

Prepared or commercially available aniline derivatives **SI1** (1.0 equiv, 10.8 mmol) were dissolved in 30 mL of CH<sub>2</sub>Cl<sub>2</sub> and cooled to 0 °C. The corresponding acetyl chloride (1.05 equiv) was added slowly to the solution followed by the addition of dry Et<sub>3</sub>N (2.0 equiv). Then the temperature of the reaction mixture was allowed to reach room temperature and further stirred. After the reaction was completed, water (40 mL) was added to the reaction mixture. The organic layer was washed with brine (2 × 20 mL), dried over anhydrous Na<sub>2</sub>SO<sub>4</sub> and concentrated in vacuo. The residue was purified by column chromatography over SiO<sub>2</sub> using mixtures of EtOAc and petroleum ether (2% to 5% EtOAc/petroleum ether) to obtain the products **SI2**. In many cases, these derivatives were used in the synthetic protocol without any further purification. Thus, compounds **SI2** (1.0 equiv, 11.4 mmol) were added to a mixture of polyphosphoric acid (PPA) (6.0 equiv) and phosphorus oxychloride (POCl<sub>3</sub>) (6.0 equiv). The reaction mixture was heated at 120 °C and the dense solution was stirred for 3 h. The reaction mixture was allowed to cool down to room temperature. CH<sub>2</sub>Cl<sub>2</sub> was added to the original dense solution and the new solution was slowly poured into ice water. The aqueous solution was neutralized with an ammonia solution (30%), extracted with CH<sub>2</sub>Cl<sub>2</sub> (30 mL). The organic solution was washed with brine (2 x 30 mL) and dried over anhydrous Na<sub>2</sub>SO<sub>4</sub>, concentrated under vacuum. The crude mixture was purified by column chromatography over SiO<sub>2</sub> eluting with mixtures of EtOAc and petroleum ether (1:19) to give the desired products.

## (b) Preparation of Deuterated Dibenzoxazepine:

Schematic representation for the preparation of deuterated dibenzoxazepine:

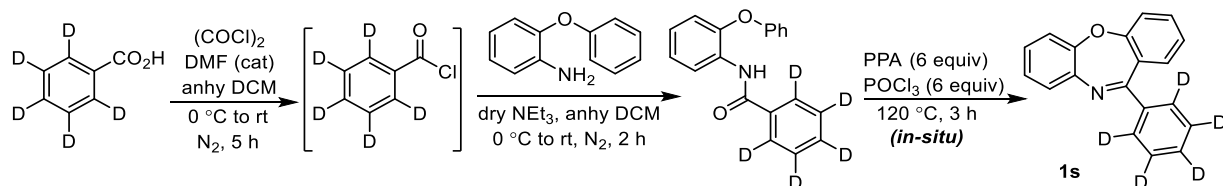

A 25 mL two-necked round-bottom flask was charged with benzoic acid-2,3,4,5,6-*d*<sub>5</sub> (1.0 equiv, 3.93 mmol), dry DCM (8 mL) and catalytic amount of DMF (4 drops). The reaction mixture was cooled to 0 °C and stirred for 5 minutes under N<sub>2</sub>. Then oxalyl chloride (1.2 equiv) was added dropwise to the reaction mixture and stirred at room temperature for 5 h. The resulting mixture was concentrated under reduced pressure to afford deuterated acid chloride quantitatively which was used directly without further purification for the next step. Swiftly the corresponding deuterated acid chloride was dissolved in dry DCM (10 mL) at 0 °C under N<sub>2</sub> and 2-phenoxy aniline (1.0 equiv, 3.56 mmol) was added into the solution followed by the addition of dry Et<sub>3</sub>N (1.0 mL) and stirred at room temperature for 2 h. After checking TLC, the crude product was used directly without further purification for the final cyclization step in presence of PPA (6.0 equiv) and POCl<sub>3</sub> (6.0 equiv) at 120 °C for 3 h as mentioned above in details. Purification by column chromatography over SiO<sub>2</sub> eluting with mixtures of EtOAc and petroleum ether (1:19) afforded 11-(phenyl-*d*<sub>5</sub>)dibenzo[*b,f*][1,4]oxazepine (**1s**, 951 mg, pale-yellow solid, yield = 86%).

<sup>1</sup>H NMR (400 MHz, CDCl<sub>3</sub>) δ 7.52-7.47 (m, 1H), 7.46-7.44 (m, 1H), 7.28 (app d, *J* = 8 Hz, 1H), 7.23-7.19 (comp, 4H), 7.17-7.13 (m, 1H); <sup>13</sup>C{<sup>1</sup>H} NMR (100 MHz, CDCl<sub>3</sub>) δ 167.0, 162.0, 152.4, 140.8, 139.9, 133.0, 131.3, 129.5, 129.1 (d, *J* = 24.6 Hz), 128.2, 127.8 (d, *J* = 24.4 Hz), 127.5, 127.4, 125.5, 124.4, 120.9, 120.7; HRMS (ESI, *m/z*) calcd for C<sub>19</sub>H<sub>9</sub>D<sub>5</sub>NO [M + H]<sup>+</sup> 277.1389, found 277.1386.

## (c) Oxidation of Benzothiazepine Directing Group:

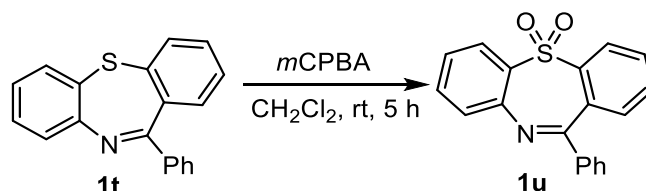

Following a literature procedure<sup>[1b]</sup> 11-phenyldibenzo[*b,f*][1,4]thiazepine, **1t** (1.0 equiv, 1.0 mmol) was dissolved in CH<sub>2</sub>Cl<sub>2</sub> (15 mL) and 3-chloroperbenzoic acid (55-75% wt.) (3.0 equiv) was added. After 5 hours stirring at room temperature the mixture was diluted with CH<sub>2</sub>Cl<sub>2</sub> and washed with saturated aq. NaHCO<sub>3</sub> (3 x 30 mL). The organic phase was dried over Na<sub>2</sub>SO<sub>4</sub>, filtered and evaporated to dryness. Purification by column chromatography over SiO<sub>2</sub> eluting with mixtures

of EtOAc and petroleum ether (1:9) afforded 11-phenyldibenzo[*b,f*][1,4]thiazepine 5,5-dioxide (**1u**, 220 mg, yield = 69%).

#### (d) Preparation of Ynones as Coupling Partner:

The corresponding ynones was synthesized by following the general known literature.<sup>[2]</sup>

*Schematic representation for the preparation of alkynone:*

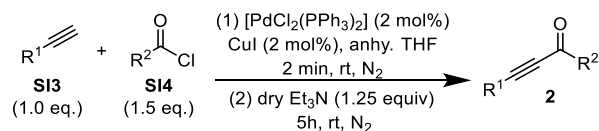

To a dry, 25 ml two-neck flask was added alkyne (1.0 equiv), acid chloride (1.5 equiv), PdCl<sub>2</sub>(PPh<sub>3</sub>)<sub>2</sub> (0.02 equiv) and CuI (0.02 equiv). The flask was filled with N<sub>2</sub> for three times by evacuating air. Then dry THF (5 mL) was added to the flask by syringe. After stirring at room temperature for 2 min, dry Et<sub>3</sub>N (1.25 equiv) was added. The reaction mixture was stirred for 5 hours then diluted by EtOAc (3 x 30 mL) and washed with brine (3 x 30 mL). The organic layer was collected and dried over anhydrous Na<sub>2</sub>SO<sub>4</sub>, concentrated under vacuum and purified by column chromatography over SiO<sub>2</sub> with mixtures of EtOAc and petroleum ether (2% to 5% EtOAc/petroleum ether) to afford corresponding ynones.

## 2. General Procedure for Spirocyclization:

### (a) Mili-gram scale (0.2 mmol Scale):

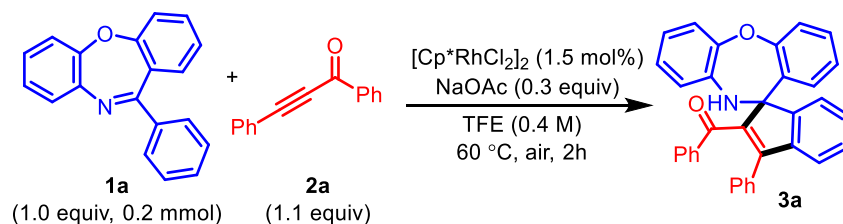

In a dried 5 mL screw-capped reaction vial, 11-phenyldibenzo[*b,f*][1,4]oxazepane (**1a**) (54.3 mg, 0.2 mmol, 1.0 equiv), 1,3-diphenylprop-2-yn-1-one (**2a**) (45.4 mg, 0.22 mmol, 1.1 equiv),  $[\text{Cp}^*\text{RhCl}_2]_2$  (1.85 mg, 0.003 mmol, 0.015 equiv), and NaOAc (4.92 mg, 0.06 mmol, 0.3 equiv) were taken and 0.5 mL (0.4 M) of TFE was added. The vial was closed with a teflon-lined cap and kept on stirring in a preheated hot-plate at 60 °C. After 2 h, the reaction was stopped and cooled to room temperature. The reaction mixture was filtered through a short pad of celite and concentrated under vacuo. The crude reaction mixture was directly purified by column chromatography on silica gel using pet ether/ethyl acetate (4:1) as eluent to obtain phenyl(3'-phenyl-10*H*-spiro[dibenzo[*b,f*][1,4]oxazepine-11,1'-inden]-2'-yl)methanone (**3a**) (95.5 mg, yield = 99%).

### (b) Gram scale:

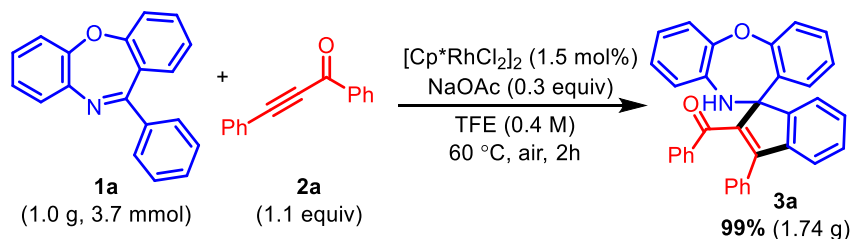

To a dried 25 mL round bottom flask, 11-phenyldibenzo[*b,f*][1,4]oxazepane (**1a**) (1.0 g, 3.7 mmol, 1.0 equiv), 1,3-diphenylprop-2-yn-1-one (**2a**) (836.3 mg, 4.1 mmol, 1.1 equiv),  $[\text{Cp}^*\text{RhCl}_2]_2$  (34.2 mg, 0.055 mmol, 0.015 equiv), and NaOAc (90.7 mg, 1.1 mmol, 0.3 equiv) were taken and 9.2 mL (0.4 M) of TFE was added. The mouth of the round bottom flask was closed with a glass stopper and kept on stirring in a preheated oil bath at 60 °C. After 2 h, the reaction was stopped and cooled to room temperature. The reaction mixture was filtered through a short pad of celite and concentrated under vacuo. The crude reaction mixture was directly purified by column chromatography on silica gel using pet ether/ethyl acetate (4:1) as eluent to obtain phenyl(3'-phenyl-10*H*-spiro[dibenzo[*b,f*][1,4]oxazepine-11,1'-inden]-2'-yl)methanone (**3a**) (1.74 g, yield = 99%).

### 3. Mechanistic Experiments:

#### (a) Procedure for H/D Exchange Experiment:

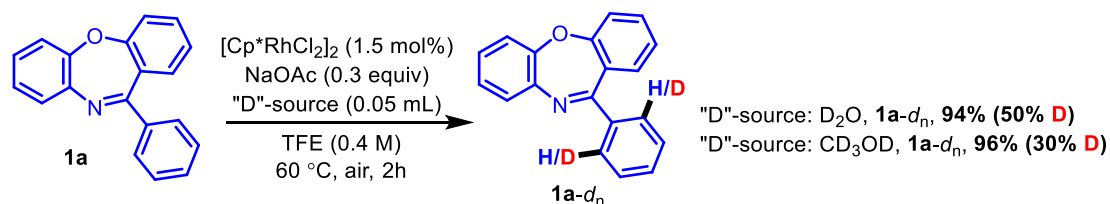

A dried 5 mL screw-capped reaction vial was charged with 11-phenyldibenzo[*b,f*][1,4]oxazepane (**1a**) (54.3 mg, 0.2 mmol, 1.0 equiv), [Cp\*RhCl<sub>2</sub>]<sub>2</sub> (1.85 mg, 0.003 mmol, 0.015 equiv), and NaOAc (4.92 mg, 0.06 mmol, 0.3 equiv) were taken and 0.5 mL (0.4 M) of TFE was added. To it, 0.05 mL (3.0 mmol, 15.0 equiv) of D<sub>2</sub>O or 0.05 mL of CD<sub>3</sub>OD as D-source (excess) was added. The vial was closed with a teflon-lined cap and stirred in a preheated hot-plate. After 2 h, the reactions were stopped and cooled to room temperature. The reaction mixture were filtered through a short pad of celite and concentrated under vacuo. The starting material (**1a-d<sub>n</sub>**) was recovered by purifying through column chromatography on silica gel using pet ether/ethyl acetate (19:1) as eluent. The deuterium incorporation was determined by <sup>1</sup>H NMR spectroscopy.

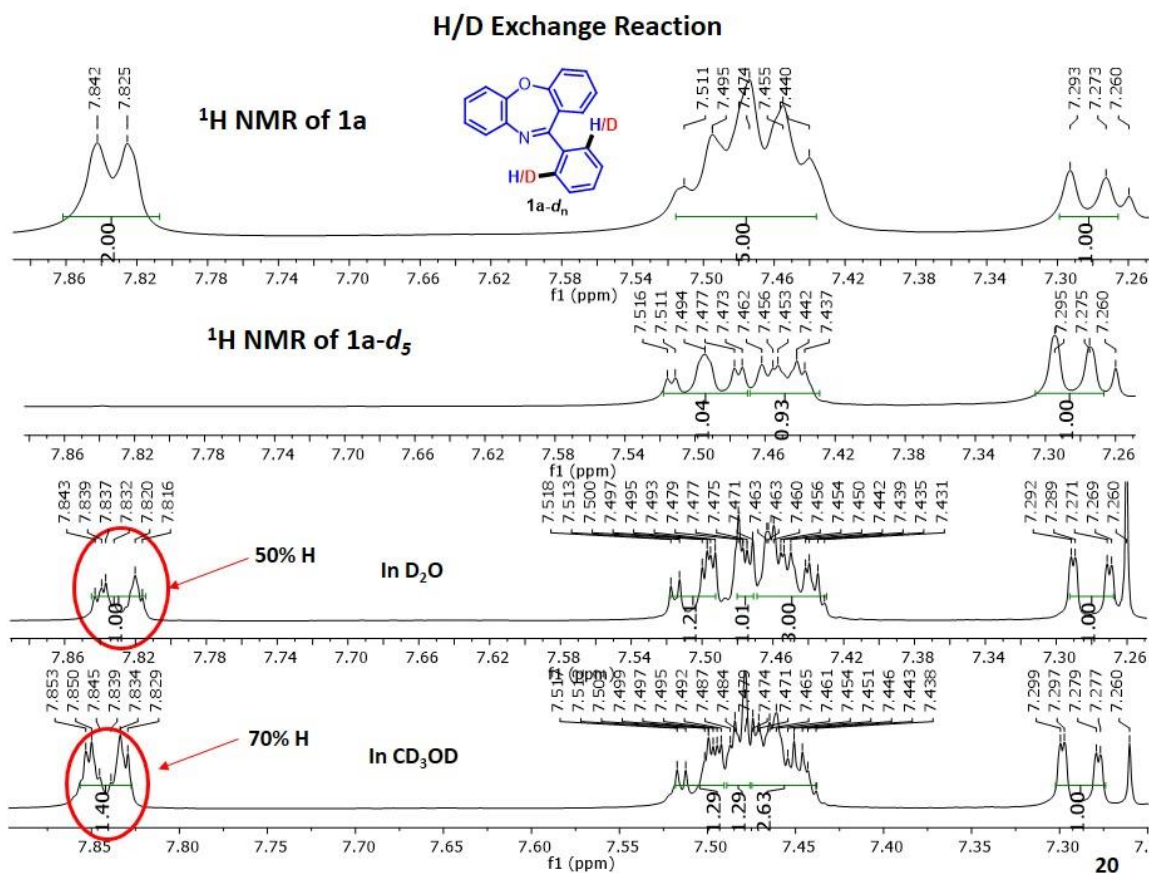

**(b) Procedure for Competitive Experiments between Dibenzoxazepines and alkyne:**

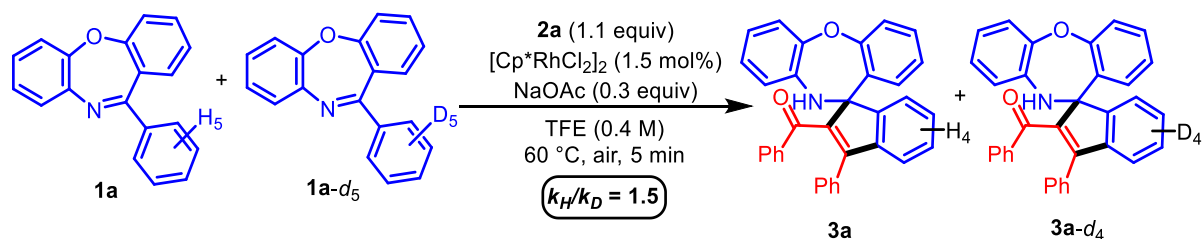

Competitive Experiment between 11-phenyldibenzo[*b,f*][1,4]oxazepane (**1a**) and 11-(phenyl-*d*<sub>5</sub>)dibenzo[*b,f*][1,4]oxazepane (**1a-d<sub>5</sub>**). In a dried 5 mL screw-capped reaction vial, 11-phenyldibenzo[*b,f*][1,4]oxazepane (**1a**) (27.1 mg, 0.1 mmol, 1.0 equiv), 11-(phenyl-*d*<sub>5</sub>)dibenzo[*b,f*][1,4]oxazepane (**1a-d<sub>5</sub>**) (27.6 mg, 0.1 mmol, 1.0 equiv), 1,3-diphenylprop-2-yn-1-one (**2a**) (45.4 mg, 0.22 mmol, 1.1 equiv), [Cp\**RhCl*<sub>2</sub>]<sub>2</sub> (1.85 mg, 0.003 mmol, 0.015 equiv), and NaOAc (4.92 mg, 0.06 mmol, 0.3 equiv) were taken and 0.5 mL (0.4 M) of TFE was added. The vial was closed with a teflon-lined cap and stirred in a preheated hot-plate. After 5 min, the reaction was quickly quenched by adding ethyl acetate keeping in an ice bath. The reaction mixture was filtered through a short pad of celite and concentrated under vacuo. The crude reaction mixture was directly purified by column chromatography on silica gel using petroleum ether/ethyl acetate (19:1 then 9:1) as eluent. The ratio of **3a** and **3a-d<sub>4</sub>** was determined by <sup>1</sup>H NMR spectroscopy. No primary kinetic isotopic effect was found as  $k_H/k_D \approx 0.60/0.40 \approx 1.5$ .



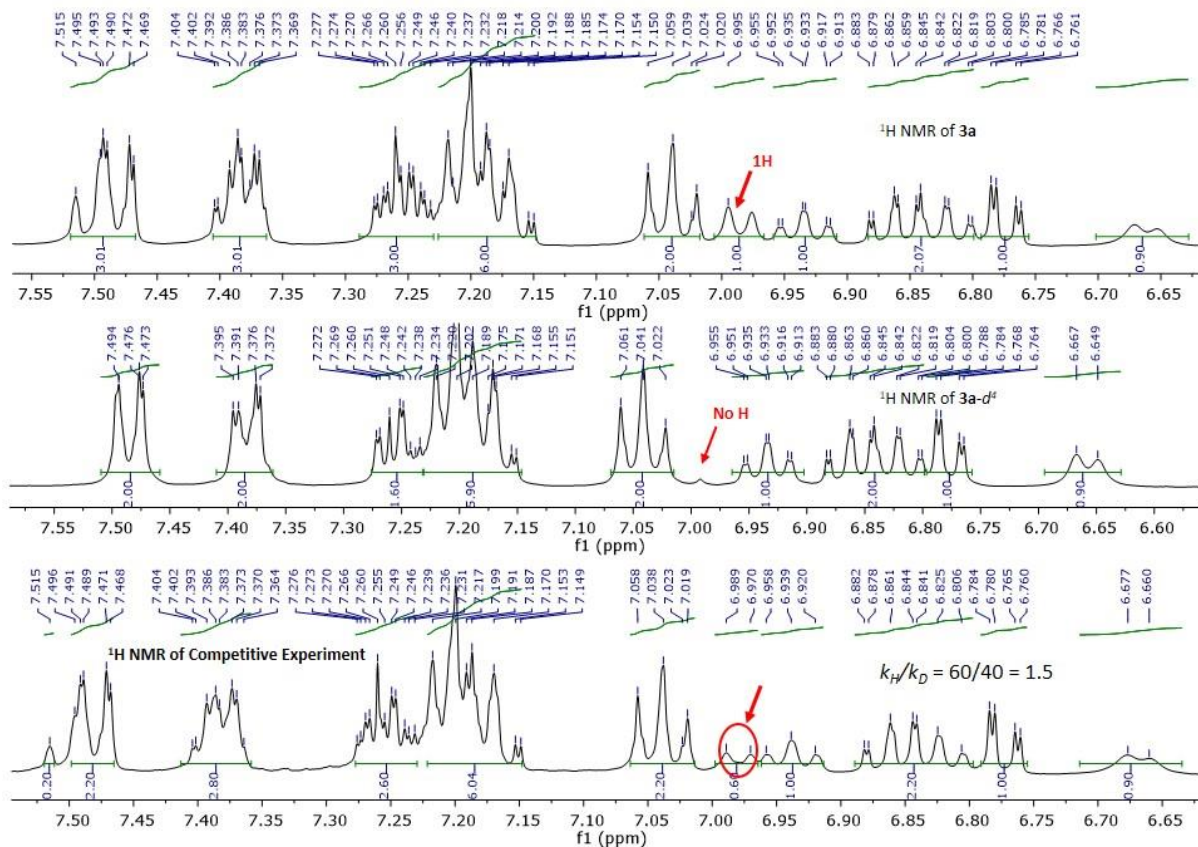

**(c) Procedure for parallel experiment between **1a** and **1a-d<sub>5</sub>**:**

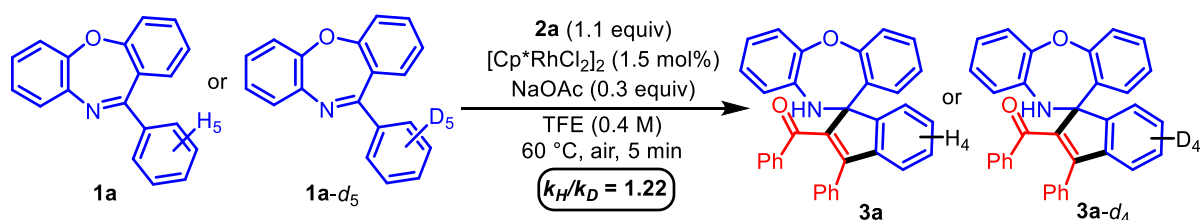

Two separate dried 5 mL screw-capped reaction vial were charged with **1a** (27.1 mg, 0.1 mmol) and **1a-d<sub>5</sub>** (27.6 mg, 0.1 mmol). 1,3-diphenylprop-2-yn-1-one (**2a**) (45.4 mg, 0.22 mmol, 1.1 equiv), [Cp\**RhCl*<sub>2</sub>]<sub>2</sub> (1.85 mg, 0.003 mmol, 0.015 equiv), and NaOAc (4.92 mg, 0.06 mmol, 0.3 equiv) were taken and 0.5 mL (0.4 M) of TFE was added. The vial was closed with a teflon-lined cap and stirred in a preheated hot-plate. After 5 min, the reaction was quickly quenched by adding ethyl acetate keeping in an ice bath. The reaction mixture was filtered through a short pad of celite, both the reaction mixtures were combined and concentrated under vacuo. The crude reaction mixture was directly purified by column chromatography on silica gel using petroleum ether/ethyl acetate (19:1 then 9:1) as eluent. The ratio of **3a** and **3a-d<sub>4</sub>** was determined by <sup>1</sup>H NMR spectroscopy. No primary kinetic isotopic effect was found as  $k_H/k_D \approx 0.55/0.45 \approx 1.22$ .

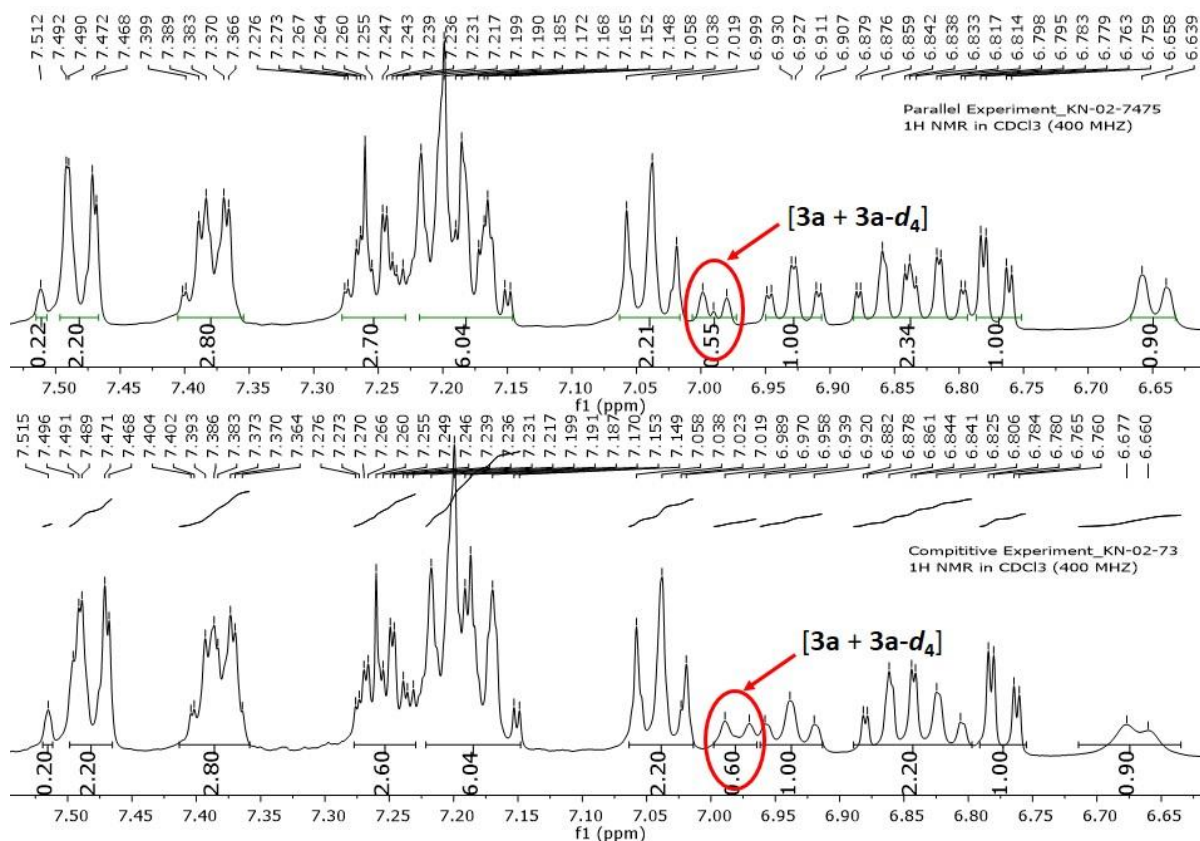

**(d) General Procedure for the Preparation of the Rhodacycle Complexes:**

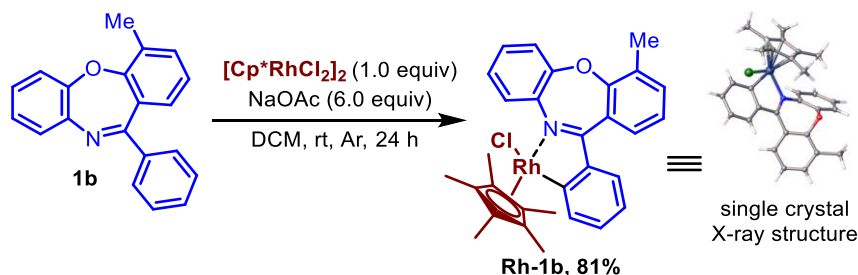

Following an analogous literature procedure,<sup>[3]</sup> a mixture of  $[\text{Cp}^*\text{RhCl}_2]_2$  (25.0 mg, 0.04 mmol, 1 equiv), 4-methyl-11-phenyldibenzo[*b,f*][1,4]oxazepine (**1b**) (25.1 mg, 0.088 mmol, 2.2 equiv), and NaOAc (20.0 mg, 0.24 mmol, 6.0 equiv) in 10.0 mL of dry DCM was allowed to stir under argon atmosphere at room temperature (approximately 28 °C) overnight. After completion of the reaction, the reaction mixture was passed through a short pad of celite and concentrated under vacuo, followed by washing with hexane and finally vacuum-dried to give the cyclometalated compound **Rh-1b** as a reddish-brown solid (36.1 mg, 81% yield).

**Yield** 81% (36.1 mg); Reddish-brown solid; **mp**: 256-258 °C (decomp.) (Crystallization from  $\text{CHCl}_3$  and hexane using solvent diffusion method); **<sup>1</sup>H NMR** (400 MHz,  $\text{CDCl}_3$ )  $\delta$  8.62-8.59 (m, 1H), 7.90 (app dd,  $J = 7.7, 1.0$  Hz, 1H),

7.46 (app dd,  $J = 7.8, 1.3$  Hz, 1H), 7.41-7.39 (m, 1H), 7.35-7.33 (m, 1H), 7.29-7.27 (m, 1H), 7.24-7.19 (comp, 3H), 7.15-7.11 (m, 1H), 7.04-6.99 (m, 1H), 2.54 (s, 3H), 1.38 (s, 15H);  $^{13}\text{C}\{^1\text{H}\}$  NMR (100 MHz,  $\text{CDCl}_3$ )  $\delta$  142.6, 140.6, 136.8, 134.0, 133.2, 131.1, 130.7, 130.1, 129.7, 128.2, 127.8, 127.4, 126.2, 124.1, 122.0, 121.6, 121.5, 119.7, 97.0, 97.0, 16.2, 8.8; HRMS (ESI,  $m/z$ ) calcd for  $\text{C}_{30}\text{H}_{29}\text{NORh}$   $[\text{M} - \text{Cl}]^+$  522.1304, found 522.1304.

**Figure S1.** X-ray crystal structure of **Rh-1b** (ellipsoid contour at 50% probability level)

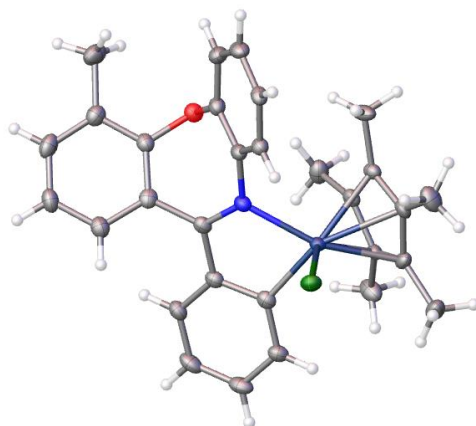

### Crystal data and structure refinement for Rh-1b, CCDC No. 2226413

|                                               |                                             |
|-----------------------------------------------|---------------------------------------------|
| Empirical formula                             | $\text{C}_{30}\text{H}_{29}\text{ClNORh}$   |
| Formula weight                                | 557.90                                      |
| Temperature/K                                 | 100.0                                       |
| Crystal system                                | orthorhombic                                |
| Space group                                   | Pbca                                        |
| $a/\text{\AA}$                                | 15.3583(10)                                 |
| $b/\text{\AA}$                                | 13.3106(9)                                  |
| $c/\text{\AA}$                                | 23.5375(16)                                 |
| $\alpha/^\circ$                               | 90                                          |
| $\beta/^\circ$                                | 90                                          |
| $\gamma/^\circ$                               | 90                                          |
| Volume/ $\text{\AA}^3$                        | 4811.7(6)                                   |
| Z                                             | 8                                           |
| $\rho_{\text{calc}}/\text{g/cm}^3$            | 1.540                                       |
| $\mu/\text{mm}^{-1}$                          | 6.939                                       |
| F(000)                                        | 2288.0                                      |
| Crystal size/ $\text{mm}^3$                   | $0.2 \times 0.2 \times 0.1$                 |
| Radiation                                     | Cu $\text{K}\alpha$ ( $\lambda = 1.54178$ ) |
| $2\Theta$ range for data collection/ $^\circ$ | 7.512 to 132.792                            |

|                                                |                                                               |
|------------------------------------------------|---------------------------------------------------------------|
| Index ranges                                   | $-18 \leq h \leq 18, -15 \leq k \leq 15, -27 \leq l \leq 27$  |
| Reflections collected                          | 86084                                                         |
| Independent reflections                        | 4211 [ $R_{\text{int}} = 0.0890, R_{\text{sigma}} = 0.0310$ ] |
| Data/restraints/parameters                     | 4211/0/314                                                    |
| Goodness-of-fit on $F^2$                       | 1.133                                                         |
| Final R indexes [ $I \geq 2\sigma(I)$ ]        | $R_1 = 0.0421, wR_2 = 0.1006$                                 |
| Final R indexes [all data]                     | $R_1 = 0.0432, wR_2 = 0.1014$                                 |
| Largest diff. peak/hole / $e \text{ \AA}^{-3}$ | 0.73/-0.88                                                    |

**(e) Procedure for the Treatment of the Rhodacycle Complex Rh-1b as Catalyst:**

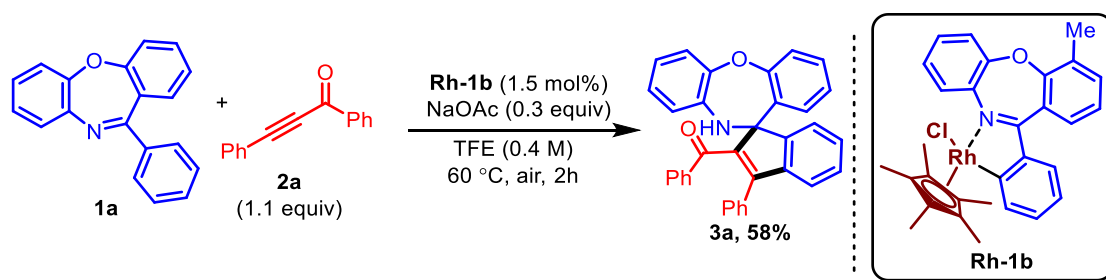

In a dried 5 mL screw-capped reaction vial, 11-phenyldibenzo[*b,f*][1,4]oxazepane (**1a**) (54.3 mg, 0.2 mmol, 1.0 equiv), 1,3-diphenylprop-2-yn-1-one (**2a**) (45.4 mg, 0.22 mmol, 1.1 equiv), Catalyst (**Rh-1b**) (1.67 mg, 0.003 mmol, 0.015 equiv), and NaOAc (4.92 mg, 0.06 mmol, 0.3 equiv) were taken and 0.5 mL (0.4 M) of TFE was added. The vial was closed with a screw cap and kept on stirring in a preheated hot-plate at 60 °C. After 2 h, the reaction was stopped and cooled to room temperature. The reaction mixture was filtered through a short pad of celite and concentrated under vacuo. The crude reaction mixture was directly purified by column chromatography on silica gel using pet ether/ethyl acetate (4:1) as eluent to obtain phenyl(3'-phenyl-10*H*-spiro[dibenzo[*b,f*][1,4]oxazepine-11,1'-inden]-2'-yl)methanone (**3a**) (56 mg, yield = 58%).

**(f) Procedure for the Treatment of the Rhodacycle Complex Rh-1b as Substrate:**

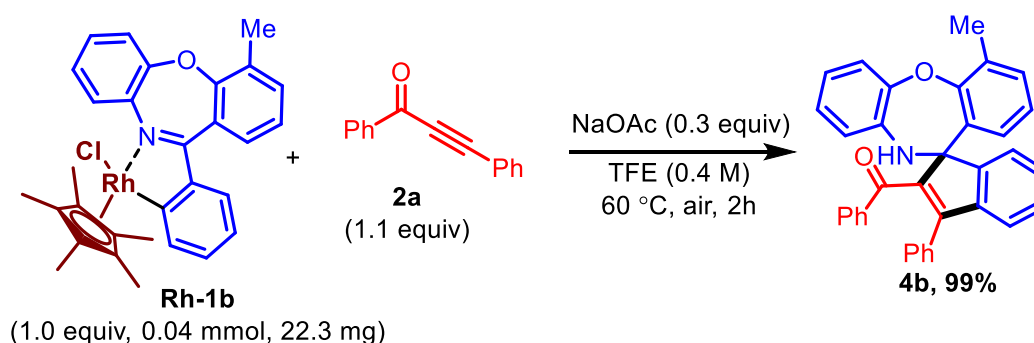

In a dried 5 mL screw-capped reaction vial, Catalyst (**Rh-1b**) (22.3 mg, 0.04 mmol, 1.0 equiv), 1,3-diphenylprop-2-yn-1-one (**2a**) (9.1 mg, 0.044 mmol, 1.1 equiv) and NaOAc (0.98 mg, 0.012 mmol, 0.3 equiv) were taken and 0.1 mL (0.4 M) of TFE was added. The vial was closed with a screw cap and kept on stirring in a preheated hot-plate at 60 °C. After 2 h, the reaction was stopped and cooled to room temperature. The reaction mixture was filtered through a short pad of celite and concentrated under vacuo. The crude reaction mixture was directly purified by column chromatography on silica gel using pet ether/ethyl acetate (9:1) as eluent to obtain (4-methyl-3'-phenyl-10*H*-spiro[dibenzo[*b,f*][1,4]oxazepine-11,1'-inden]-2'-yl)(phenyl)methanone (**4b**) (19.5 mg, yield = 99%).

### References:

1. (a) Zhang *et al.*, *Chem. Commun.*, 2011, **47**, 7845–7847; (b) Vidal-Ferran *et al.*, *Chem. Eur. J.*, 2016, **22**, 10607–10613.
2. Sun *et al.*, *Org. Biomol. Chem.*, 2020, **18**, 1073–1077.
3. Xiao *et al.*, *Chem. Commun.*, 2018, **54**, 11805-11808.

**Table S1. Additional Optimization of Reaction Conditions<sup>a</sup>**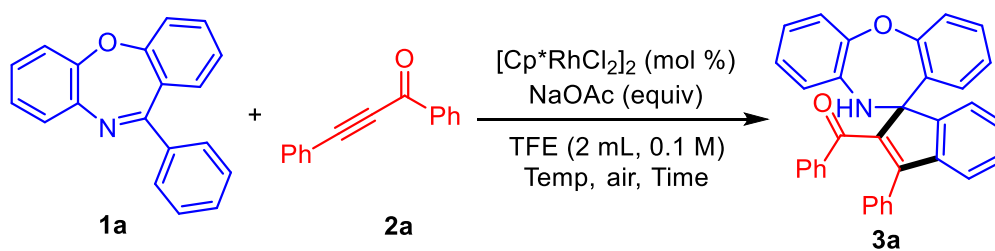

| Entry          | $[\text{Cp}^*\text{RhCl}_2]_2$ (mol %) | NaOAc (equiv) | Temp (°C) | Time (h) | Yield (%) of <b>3a</b> <sup>b</sup> |
|----------------|----------------------------------------|---------------|-----------|----------|-------------------------------------|
| 1              | 1                                      | 1.0           | 60        | 2        | 92                                  |
| 2              | 3                                      | 1.0           | 60        | 2        | 99                                  |
| 3              | 1.5                                    | 0.15          | 60        | 2        | 94                                  |
| 4              | 1.5                                    | 0.5           | 60        | 2        | 99                                  |
| 5 <sup>c</sup> | 5                                      | 1.0           | 60        | 2        | 99                                  |
| 6 <sup>c</sup> | 5                                      | 1.0           | 40        | 2        | 97                                  |
| 7 <sup>c</sup> | 5                                      | 1.0           | 60        | 1        | 92                                  |
| 8 <sup>d</sup> | 1.5                                    | 0.3           | 60        | 2        | 99                                  |

<sup>a</sup>Reaction conditions: **1a** (1.0 equiv, 0.2 mmol), **2a** (1.1 equiv),  $[\text{Cp}^*\text{RhCl}_2]_2$  (mol %), NaOAc (equiv), 2.0 mL TFE (0.1 M), under air. <sup>b</sup>Isolated yield. <sup>c</sup>under  $\text{N}_2$ . <sup>d</sup>1.0 mL TFE (0.1 M). TFE = 2,2,2-trifluoroethanol.

**Table S2. Unsuccessful Substrate and Coupling Partner**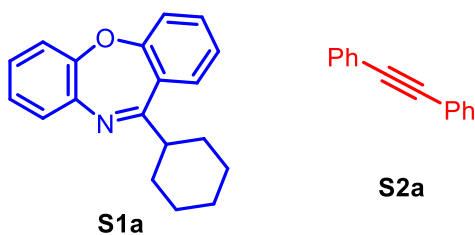

## Characterization of Spirocyclized Products:

### phenyl(3'-phenyl-10*H*-spiro[dibenzo[*b,f*][1,4]oxazepine-11,1'-inden]-2'-yl)methanone (**3a**):

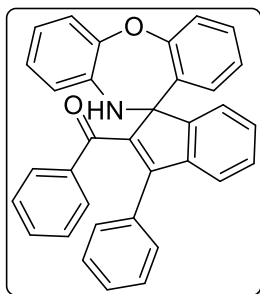

**Yield** 99% (95.5 mg); Yellow solid; **R<sub>f</sub>** 0.38 (pet ether/ethyl acetate = 9:1); **eluent composition** petroleum ether/ethyl acetate = 4:1; **mp** 80-82 °C; **<sup>1</sup>H NMR** (400 MHz, CDCl<sub>3</sub>) δ 7.52-7.50 (comp, 2H), 7.48-7.47 (m, 1H), 7.40-7.36 (comp, 3H), 7.28-7.24 (comp, 2H), 7.23-7.17 (comp, 5H), 7.16 (comp, 2H), 7.07-7.02 (comp, 2H), 7.00 (app d, *J* = 7.4 Hz, 1H), 6.96-6.91 (m, 1H), 6.86 (m, 1H), 6.84-6.77 (comp, 2H), 6.67-6.65 (m, 1H), 4.50 (br s, 1 N-H); **<sup>13</sup>C{<sup>1</sup>H} NMR** (100 MHz, CDCl<sub>3</sub>) δ 194.8, 156.4, 152.1, 152.0, 147.3, 146.6, 141.0, 138.1, 137.5, 132.9, 132.0, 129.1, 129.0, 128.8, 128.7, 128.6, 128.5, 128.5, 128.3, 127.6, 127.4, 124.6, 124.4, 123.8, 123.7, 123.4, 122.9, 122.0, 120.9, 76.0; **HRMS** (ESI, *m/z*) calcd for C<sub>34</sub>H<sub>24</sub>NO<sub>2</sub> [M + H]<sup>+</sup> 478.1807, found 478.1807.

**Figure S2.** X-ray crystal structure of **3a** (ellipsoid contour at 50% probability level)

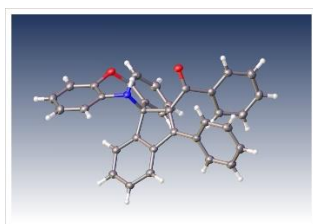

### Crystal data and structure refinement for **3a**, CCDC No. 2242551

|                       |                                                 |                                                       |                                                                  |
|-----------------------|-------------------------------------------------|-------------------------------------------------------|------------------------------------------------------------------|
| Identification code   | KN_01_133                                       | $\rho_{\text{calc}}/\text{cm}^3$                      | 1.306                                                            |
| Empirical formula     | C <sub>34</sub> H <sub>23</sub> NO <sub>2</sub> | $\mu/\text{mm}^{-1}$                                  | 0.634                                                            |
| Formula weight        | 477.53                                          | F(000)                                                | 500.0                                                            |
| Temperature/K         | 100.00                                          | Crystal size/mm <sup>3</sup>                          | 0.35 × 0.2 × 0.02                                                |
| Crystal system        | Triclinic                                       | Radiation                                             | CuK $\alpha$ ( $\lambda$ = 1.54178)                              |
| Space group           | P-1                                             | 2 $\theta$ range for data collection/°                | 7.382 to 130.13                                                  |
| <i>a</i> /Å           | 8.8451(2)                                       | Index ranges                                          | -10 ≤ <i>h</i> ≤ 10, -14 ≤ <i>k</i> ≤ 14,<br>-15 ≤ <i>l</i> ≤ 15 |
| <i>b</i> /Å           | 11.9809(3)                                      | Reflections collected                                 | 47267                                                            |
| <i>c</i> /Å           | 13.3608(3)                                      | Independent reflections                               | 4121 [R <sub>int</sub> = 0.0728,<br>R <sub>sigma</sub> = 0.0348] |
| $\alpha$ /°           | 65.2590(10)                                     | Data/restraints/parameters                            | 4121/0/335                                                       |
| $\beta$ /°            | 74.7890(10)                                     | Goodness-of-fit on F <sup>2</sup>                     | 1.057                                                            |
| $\gamma$ /°           | 73.1520(10)                                     | Final R indexes [ <i>I</i> ≥ 2 $\sigma$ ( <i>I</i> )] | R <sub>1</sub> = 0.0508, wR <sub>2</sub> = 0.1333                |
| Volume/Å <sup>3</sup> | 1214.40(5)                                      | Final R indexes [all data]                            | R <sub>1</sub> = 0.0529, wR <sub>2</sub> = 0.1354                |
| Z                     | 2                                               | Largest diff. peak/hole / e Å <sup>-3</sup>           | 0.72/-0.76                                                       |

**phenyl(3'-(*p*-tolyl)-10*H*-spiro[dibenzo[*b,f*][1,4]oxazepine-11,1'-inden]-2'-yl)methanone (3b):**

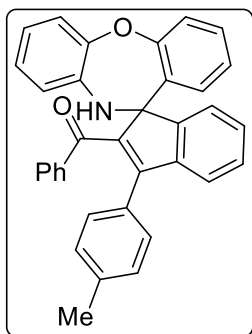

**Yield** 97% (95.4 mg); Yellow solid; **eluent composition** petroleum ether/ethyl acetate = 4:1; **mp** 196-198 °C; **<sup>1</sup>H NMR** (400 MHz, CDCl<sub>3</sub>) δ 7.51 (comp, 2H), 7.48-7.47 (m, 1H), 7.38 (app td, *J* = 7.6, 0.9 Hz, 1H), 7.28-7.26 (comp, 3H), 7.24 (app dd, *J* = 2.9, 1.1 Hz, 1H), 7.22-7.19 (m, 1H), 7.18-7.14 (comp, 2H), 7.07-7.01 (m, 4H), 6.98-6.91(comp, 2H), 6.87-6.79 (comp, 2H), 6.77 (app dd, *J* = 7.9, 1.6 Hz, 1H), 6.64 (app d, *J* = 6.7 Hz, 1H), 4.42 (br s, 1 N-H), 2.25 (s, 3H); **<sup>13</sup>C{<sup>1</sup>H} NMR** (100 MHz, CDCl<sub>3</sub>) δ 195.0, 156.4, 152.1, 141.2, 138.7, 137.6, 131.9, 129.9, 129.1 (x 2), 129.0 (x 2), 129.0 (x 2), 128.8, 128.6, 128.5, 128.4, 127.6 (x 2), 127.5, 124.6, 124.4, 123.8, 123.7, 123.4, 122.9, 122.0, 120.9, 75.9, 21.2; **HRMS** (ESI, *m/z*) calcd for C<sub>35</sub>H<sub>26</sub>NO<sub>2</sub> [M + H]<sup>+</sup> 492.1964, found 492.1964.

**(3'-(4-ethylphenyl)-10*H*-spiro[dibenzo[*b,f*][1,4]oxazepine-11,1'-inden]-2'-yl)(phenyl)methanone (3c):**

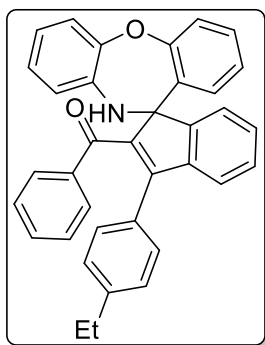

**Yield** 96% (96.7 mg); Yellow solid; **eluent composition** petroleum ether/ethyl acetate = 4:1; **mp** 168-170 °C; **<sup>1</sup>H NMR** (400 MHz, CDCl<sub>3</sub>) δ 7.53 (app d, *J* = 7.5 Hz, 1H), 7.48-7.46 (comp, 2H), 7.38 (app td, *J* = 7.5, 1.1 Hz, 1H), 7.30-7.26 (comp, 2H), 7.25-7.24 (m, 1H), 7.22-7.14 (comp, 3H), 7.05-7.01 (comp, 4H), 6.97-6.92 (comp, 2H), 6.87-6.84 (m, 1H), 6.84-6.80 (m, 1H), 6.77 (app dd, *J* = 7.9, 1.7 Hz, 1H), 6.65 (app d, *J* = 7.3 Hz, 1H), 4.45 (br s, 1 N-H), 2.54 (q, *J* = 7.6 Hz, 3H), 1.13 (t, *J* = 7.6 Hz, 2H); **<sup>13</sup>C{<sup>1</sup>H} NMR** (100 MHz, CDCl<sub>3</sub>) δ 194.9, 156.3, 152.3, 152.0, 152.0, 147.2, 146.8, 145.0, 141.2, 138.1, 137.6, 131.8, 130.1, 129.1, 129.1, 128.8, 128.6, 128.5, 128.4, 127.8, 127.5, 124.6, 124.4, 124.0, 123.8, 123.4, 123.0, 122.0, 120.8, 75.8, 28.6, 15.3; **HRMS** (ESI, *m/z*) calcd for C<sub>36</sub>H<sub>28</sub>NO<sub>2</sub> [M + H]<sup>+</sup> 506.2120, found 506.2125.

**phenyl(3'-(4-propylphenyl)-10*H*-spiro[dibenzo[*b,f*][1,4]oxazepine-11,1'-inden]-2'-yl)methanone (3d):**

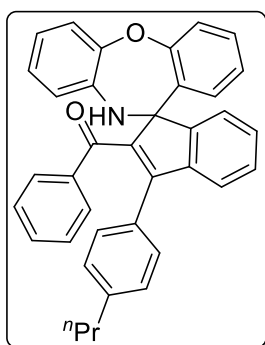

**Yield** 96% (99.6 mg); Yellow solid; **eluent composition** petroleum ether/ethyl acetate = 4:1; **mp** 160-162 °C; **<sup>1</sup>H NMR** (400 MHz, CDCl<sub>3</sub>) δ 7.54 (app d, *J* = 7.5 Hz, 1H), 7.48-7.45 (comp, 2H), 7.38 (app td, *J* = 7.5, 1.0 Hz, 1H), 7.29-7.26 (comp, 3H), 7.23 (app dd, *J* = 7.5, 1.0 Hz, 1H), 7.20-7.14 (comp, 3H), 7.04-6.99 (comp, 4H), 6.97-6.92 (comp, 2H), 6.87-6.81 (comp, 2H), 6.77 (app dd, *J* = 7.9, 1.7 Hz, 1H), 6.66 (app d, *J* = 7.5 Hz, 1H), 4.47 (br s, 1 N-H), 2.48



(t,  $J = 7.5$  Hz, 2H), 1.53 (m, 2H), 0.82 (t,  $J = 7.3$  Hz, 3H);  $^{13}\text{C}\{^1\text{H}\}$  NMR (100 MHz,  $\text{CDCl}_3$ )  $\delta$  194.9, 156.3, 152.4, 152.0, 147.5, 146.6, 143.4, 141.1, 138.1, 137.7, 131.7, 130.2, 129.1 (x 2), 129.0, 128.8, 128.5, 128.5, 128.4 (x 2), 127.4, 124.6, 124.4, 124.2, 123.9, 123.4, 123.0, 122.0, 120.8, 75.8, 37.6, 24.2, 13.5; HRMS (ESI,  $m/z$ ) calcd for  $\text{C}_{37}\text{H}_{30}\text{NO}_2$   $[\text{M} + \text{H}]^+$  520.2277, found 520.2281.

**(3'-(4-butylphenyl)-10H-spiro[dibenzo[*b,f*][1,4]oxazepine-11,1'-inden]-2'-yl)(phenyl)methanone (3e):**

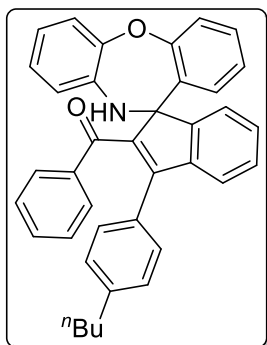

**Yield** 98% (104.0 mg); Yellow solid; **eluent composition** petroleum ether/ethyl acetate = 4:1; **mp** 122-124 °C;  $^1\text{H}$  NMR (400 MHz,  $\text{CDCl}_3$ )  $\delta$  7.53 (app d,  $J = 7.6$  Hz, 1H), 7.47-7.44 (comp, 2H), 7.38 (app td,  $J = 7.6, 1.0$  Hz, 1H), 7.27-7.26 (comp, 3H), 7.24-7.14 (comp, 4H), 7.04-6.99 (comp, 4H), 6.97-6.93 (comp, 2H), 6.87-6.81 (comp, 2H), 6.76 (app dd,  $J = 7.9, 1.7$  Hz, 1H), 6.69 (app s, 1H), 4.48 (br s, 1 N-H), 2.50 (t,  $J = 7.5$  Hz, 2H), 1.52-1.44 (m, 2H), 1.26-1.16 (m, 2H), 0.89 (t,  $J = 7.3$  Hz, 3H);  $^{13}\text{C}\{^1\text{H}\}$  NMR (100 MHz,  $\text{CDCl}_3$ )  $\delta$  194.9, 156.3, 152.5, 152.0, 151.9, 143.7, 141.2, 141.0, 138.0, 137.7, 131.7, 130.1, 129.1 (x 2), 129.0, 128.8, 128.6, 128.5, 128.4, 127.4, 124.6, 124.5, 124.2, 124.0, 124.0, 123.4, 123.1, 122.0, 120.8, 75.8, 35.3, 33.2, 22.0, 13.9; HRMS (ESI,  $m/z$ ) calcd for  $\text{C}_{38}\text{H}_{32}\text{NO}_2$   $[\text{M} + \text{H}]^+$  534.2433, found 534.2412.

**(3'-(4-ethoxyphenyl)-10H-spiro[dibenzo[*b,f*][1,4]oxazepine-11,1'-inden]-2'-yl)(phenyl)methanone (3f):**

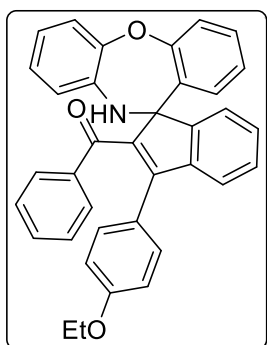

**Yield** 93% (97.0 mg); Yellow solid; **eluent composition** petroleum ether/ethyl acetate = 4:1; **mp** 192-194 °C;  $^1\text{H}$  NMR (400 MHz,  $\text{CDCl}_3$ )  $\delta$  7.53 (app d,  $J = 7.5$  Hz, 1H), 7.50-7.47 (comp, 2H), 7.38 (app td,  $J = 7.5, 1.0$  Hz, 1H), 7.31-7.28 (comp, 2H), 7.27-7.22 (comp, 2H), 7.20-7.13 (comp, 2H), 7.07-7.04 (comp, 2H), 6.96-6.92 (comp, 2H), 6.86-6.81 (comp, 2H), 6.77-6.70 (comp, 3H), 6.64 (app d,  $J = 7.5$  Hz, 1H), 4.44 (br s, 1 N-H), 3.94 (q,  $J = 7.0$  Hz, 2H), 1.36 (t,  $J = 7.0$  Hz, 3H);  $^{13}\text{C}\{^1\text{H}\}$  NMR (100 MHz,  $\text{CDCl}_3$ )  $\delta$  195.0, 159.3, 156.3, 152.4, 141.2, 137.6, 131.9, 130.5 (x 2), 129.1 (x 2), 128.8, 128.6, 128.5, 128.4, 127.6 (x 2), 127.5, 125.0, 123.9 (x 2), 124.6, 124.5, 124.1, 123.4, 123.0, 122.0, 120.8, 114.4, 75.8, 63.4, 14.7; HRMS (ESI,  $m/z$ ) calcd for  $\text{C}_{36}\text{H}_{28}\text{NO}_3$   $[\text{M} + \text{H}]^+$  522.2069, found 522.2087.

**(3'-(4-fluorophenyl)-10*H*-spiro[dibenzo[*b,f*][1,4]oxazepine-11,1'-inden]-2'-yl)(phenyl)methanone (3g):**

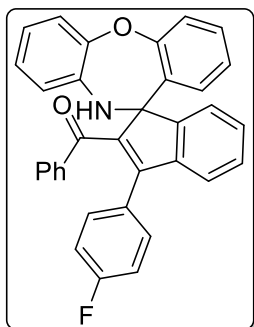

**Yield** 99% (98.1 mg); Yellow solid; **eluent composition** petroleum ether/ethyl acetate = 4:1; **mp** 172-174 °C; **<sup>1</sup>H NMR** (400 MHz, CDCl<sub>3</sub>) δ 7.47-7.44 (m, 3H), 7.41-7.34 (m, 3H), 7.28 (app dd, *J* = 7.5, 1.2 Hz, 1H), 7.26-7.22 (m, 2H), 7.19-7.15 (m, 2H), 7.08-7.04 (app t, 2H), 6.98 (app d, *J* = 7.4 Hz, 1H), 6.94-6.89 (m, 3H), 6.88-6.80 (m, 2H), 6.74 (app dd, *J* = 7.9, 1.6 Hz, 1H), 6.65 (app d, *J* = 6.8 Hz, 1H), 4.47 (br s, 1 N-H); **<sup>13</sup>C{<sup>1</sup>H} NMR** (100 MHz, CDCl<sub>3</sub>) δ 194.8, 164.0, 161.5, 156.5, 152.0, 151.6, 140.9, 137.4, 132.2, 130.9, 130.8, 129.1 (x 2), 128.9 (d, *J* = 3.2 Hz), 128.8, 128.6 (d, *J* = 3.1 Hz) (x 2), 127.7 (x 2), 127.3, 124.7, 124.5, 123.8, 123.5, 122.7, 122.0, 120.9, 115.6, 115.4, 75.9; **<sup>19</sup>F NMR** (376 MHz, CDCl<sub>3</sub>) δ -111.75; **HRMS** (ESI, *m/z*) calcd for C<sub>34</sub>H<sub>23</sub>FNO<sub>2</sub> [M + H]<sup>+</sup> 496.1713, found 496.1715.

**methyl 4-(2'-(benzoyl-10*H*-spiro[dibenzo[*b,f*][1,4]oxazepine-11,1'-inden]-3'-yl)benzoate (3h):**

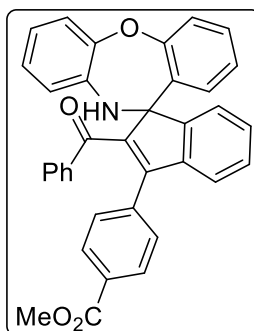

**Yield** 66% (70.7 mg); Yellow solid; **eluent composition** petroleum ether/ethyl acetate = 4:1; **mp** 88-90 °C; **<sup>1</sup>H NMR** (400 MHz, CDCl<sub>3</sub>) δ 7.90-7.88 (comp, 2H), 7.47-7.45 (comp, 4H), 7.43-7.42 (m, 1H), 7.40-7.38 (m, 1H), 7.29 (app td, *J* = 7.4, 1.4 Hz, 1H), 7.24 (app dd, *J* = 8.2, 1.3 Hz, 1H), 7.21-7.18 (comp, 2H), 7.16-7.14 (comp, 1H), 7.06-7.02 (comp, 3H), 6.94-6.86 (comp, 2H), 6.84-6.80 (m, 1H), 6.76 (app dd, *J* = 7.9, 1.6 Hz, 1H), 6.66 (app d, *J* = 5.8 Hz, 1H), 4.47 (br s, 1 N-H), 3.88 (s, 3H); **<sup>13</sup>C{<sup>1</sup>H} NMR** (100 MHz, CDCl<sub>3</sub>) δ 194.6, 166.4, 156.5, 151.6, 151.4, 140.6, 137.6, 137.2, 132.4, 130.0, 129.6 (x 2), 129.0 (x 4), 128.9, 128.8, 128.7, 128.6, 127.7 (x 2), 127.1, 124.8, 124.5, 123.6 (x 2), 122.6, 122.0, 120.9, 76.1, 52.2; **HRMS** (ESI, *m/z*) calcd for C<sub>36</sub>H<sub>26</sub>NO<sub>4</sub> [M + H]<sup>+</sup> 536.1862, found 536.1856.

**phenyl(3'-(*m*-tolyl)-10*H*-spiro[dibenzo[*b,f*][1,4]oxazepine-11,1'-inden]-2'-yl)methanone (3i):**

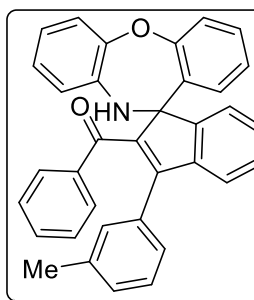

**Yield** 92% (90.4 mg); Yellow solid; **eluent composition** petroleum ether/ethyl acetate = 4:1; **mp** 86-88 °C; **<sup>1</sup>H NMR** (400 MHz, CDCl<sub>3</sub>) δ 7.52 (app d, *J* = 7.6 Hz, 1H), 7.49-7.47 (comp, 2H), 7.38 (app td, *J* = 7.5, 1.0 Hz, 1H), 7.28-7.11 (comp, 8H), 7.06-7.03 (comp, 2H), 6.98 (app t, *J* = 7.4 Hz, 2H), 6.93 (app dd, *J* = 7.8, 1.5 Hz, 1H), 6.89-6.81 (comp, 2H), 6.78 (app dd, *J* = 7.9, 1.7 Hz, 1H), 6.67-6.65 (m, 1H), 4.46 (br s, 1 N-H), 2.20 (s, 3H); **<sup>13</sup>C{<sup>1</sup>H} NMR** (100 MHz,

CDCl<sub>3</sub>)  $\delta$  194.8 , 156.4 , 152.3 , 152.0 , 147.2 , 147.0 , 141.1 , 138.1 , 138.0 , 137.7 , 132.7 , 131.8 , 123.0 , 129.4 , 129.0 (x 2), 128.8 , 128.6 , 128.5 (x 2), 128.2 , 127.4 (x 2), 125.9 , 124.6 , 124.4 , 124.0 , 123.8 , 123.4 , 123.0 , 122.0 , 120.8 , 75.8 , 21.1; **HRMS** (ESI, m/z) calcd for C<sub>35</sub>H<sub>26</sub>NO<sub>2</sub> [M + H]<sup>+</sup> 492.1964, found 492.1962.

**(3'-(phenanthren-9-yl)-10H-spiro[dibenzo[*b,f*][1,4]oxazepine-11,1'-inden]-2'-yl)(phenyl)methanone (3j):**

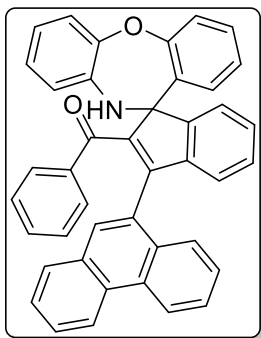

**Yield** 75% (86.3 mg, stereoisomeric ratio = 5:2); Yellow solid; **eluent composition** petroleum ether/ethyl acetate = 4:1; **mp** 262-264 °C; **<sup>1</sup>H NMR** (400 MHz, CDCl<sub>3</sub>)  $\delta$  8.65-8.60 (m, 1H), 8.55 (app d, *J* = 8.3 Hz, 1H), 7.80-7.75 (m, 1H), 7.73-7.68 (m, 1H), 7.66-7.64 (m, 1H), 7.62-7.58 (m, 1H), 7.56-7.50 (comp, 2H), 7.38-7.35 (m, 1H), 7.29-7.19 (comp, 7H), 7.13-7.10 (m, 1H), 7.06-6.91 (comp, 4H), 6.86-6.76 (comp, 3H), 6.66-6.60 (comp, 2H), 4.48 (br s, 1 N-H); **Combined <sup>13</sup>C{<sup>1</sup>H} NMR** (100 MHz, CDCl<sub>3</sub>)  $\delta$  195.4 , 194.3 , 157.1 , 156.2 , 152.2 , 141.9 , 138.2 , 137.9 , 131.4 , 131.4 , 130.9 , 130.4 , 130.3 , 130.3 , 130.2 , 129.7 , 129.1 , 128.9 , 128.8 , 128.7 , 128.6 , 128.1 , 128.1 , 128.0 , 127.4 , 127.2 , 127.1 , 127.0 , 126.8 , 126.6 , 126.6 (x 2) , 126.5 , 124.8 , 124.7 , 124.6 , 124.4 , 124.1 , 124.0 , 123.8 , 123.8 , 123.4 , 123.0 , 122.3 , 122.3 , 122.1 , 121.0 , 120.9 , 76.1 , 75.7; **HRMS** (ESI, m/z) calcd for C<sub>42</sub>H<sub>28</sub>NO<sub>2</sub> [M + H]<sup>+</sup> 578.2120, found 578.2122.

**phenyl(3'-(thiophen-2-yl)-10H-spiro[dibenzo[*b,f*][1,4]oxazepine-11,1'-inden]-2'-yl)methanone (3k):**

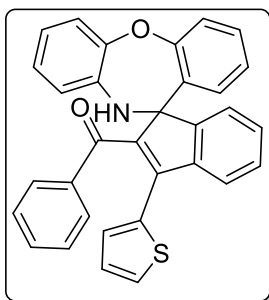

**Yield** 74% (71.8 mg); Yellow solid; **eluent composition** petroleum ether/ethyl acetate = 4:1; **mp** 172 °C; **<sup>1</sup>H NMR** (400 MHz, CDCl<sub>3</sub>)  $\delta$  7.79 (app d, *J* = 7.6 Hz, 1H), 7.58-7.56 (comp, 2H), 7.44 (app td, *J* = 7.6, 1.1 Hz, 1H), 7.31-7.27 (comp, 3H), 7.22-7.16 (comp, 2H), 7.15-7.11 (comp, 4H), 7.04 (app d, *J* = 7.4 Hz, 1H), 6.91-6.84 (comp, 3H), 6.81-6.75 (comp, 2H), 6.60-6.57 (m, 1H), 4.31 (br s, 1 N-H); **<sup>13</sup>C{<sup>1</sup>H} NMR**  $\delta$  194.9 , 156.5 , 151.3 , 151.3 , 147.7 , 140.4 , 138.1 , 137.8 , 137.3 , 133.5 , 132.3 , 129.4 , 128.9 (x 2) , 128.8 , 128.7 , 128.5 , 127.8 , 127.5 , 127.4 , 127.1 , 124.6 , 124.5 , 123.5 , 123.3 , 123.2 , 122.8 , 121.9 , 120.9 , 76.0; **HRMS** (ESI, m/z) calcd for C<sub>32</sub>H<sub>22</sub>NO<sub>2</sub>S [M + H]<sup>+</sup> 484.1371, found 484.1353.

**phenyl(3'-(thiophen-3-yl)-10*H*-spiro[dibenzo[*b,f*][1,4]oxazepine-11,1'-inden]-2'-yl)methanone (3l):**

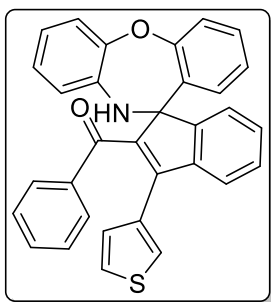

**Yield** 97% (93.7 mg); Yellow solid; **eluent composition** petroleum ether/ethyl acetate = 4:1; **mp** 180 °C; **<sup>1</sup>H NMR** (400 MHz, CDCl<sub>3</sub>) δ 7.59 (app d, *J* = 7.5 Hz, 1H), 7.53-7.51 (comp, 2H), 7.41 (app td, *J* = 7.6, 1.1 Hz, 1H), 7.36 (app dd, *J* = 2.9, 1.3 Hz, 1H), 7.30-7.24 (comp, 2H), 7.19-7.18 (m, 1H), 7.17-7.14 (comp, 2H), 7.13-7.09 (comp, 3H), 7.00 (app d, *J* = 7.5 Hz, 1H), 6.91 (app td, *J* = 7.7, 1.5 Hz, 1H), 6.87-6.79 (comp, 2H), 6.76 (app dd, *J* = 7.9, 1.6 Hz, 1H), 6.62 (app d, *J* = 7.3 Hz, 1H), 4.44 (br s, 1 N-H); **<sup>13</sup>C{<sup>1</sup>H} NMR** (100 MHz, CDCl<sub>3</sub>) δ 195.0, 156.4, 151.8, 151.5, 146.9, 140.9, 137.9, 137.4, 133.2, 132.1, 129.0 (x 2), 128.8, 128.7, 128.7, 128.5, 127.9, 127.7 (x 2), 127.4, 126.0, 126.0, 124.6, 124.5, 123.7, 123.5, 122.8, 122.0, 120.9, 75.8; **HRMS** (ESI, *m/z*) calcd for C<sub>32</sub>H<sub>22</sub>NO<sub>2</sub>S [M + H]<sup>+</sup> 484.1371, found 484.1379.

**(4-methoxyphenyl)(3'-phenyl-10*H*-spiro[dibenzo[*b,f*][1,4]oxazepine-11,1'-inden]-2'-yl)methanone (3m):**

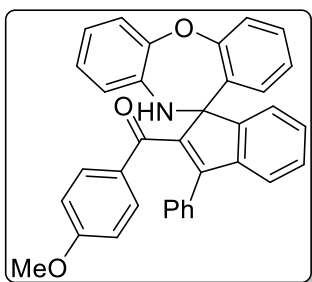

**Yield** 98% (99.5 mg); Yellow solid; **eluent composition** petroleum ether/ethyl acetate = 4:1; **mp** 202-204 °C; **<sup>1</sup>H NMR** (400 MHz, CDCl<sub>3</sub>) δ 7.51-7.48 (comp, 3H), 7.42-7.39 (comp, 2H), 7.39-7.35 (m, 1H), 7.27-7.21 (comp, 5H), 7.18-7.14 (m, 2H), 7.02 (app d, *J* = 7.4 Hz, 1H), 6.92-6.88 (m, 1H), 6.87-6.83 (m, 1H), 6.82-6.77 (m, 1H), 6.61 (app dd, *J* = 7.7, 1.6 Hz, 1H), 6.56-6.52 (comp, 2H), 4.38 (br s, 1 N-H), 3.71 (s, 3H); **<sup>13</sup>C{<sup>1</sup>H} NMR** (100 MHz, CDCl<sub>3</sub>) δ 193.4, 162.8, 156.5, 151.8, 151.7, 147.7, 144.9, 141.1, 138.1, 133.0, 131.5, 130.5, 128.9 (x 3), 128.6, 128.5, 128.4, 128.2, 127.4, 124.6, 124.4, 123.5, 123.4 (x 2), 122.6, 122.0, 120.8, 112.9, 76.0, 55.2; **HRMS** (ESI, *m/z*) calcd for C<sub>35</sub>H<sub>26</sub>NO<sub>3</sub> [M + H]<sup>+</sup> 508.1913, found 508.1911.

**(4-fluorophenyl)(3'-phenyl-10*H*-spiro[dibenzo[*b,f*][1,4]oxazepine-11,1'-inden]-2'-yl)methanone (3n):**

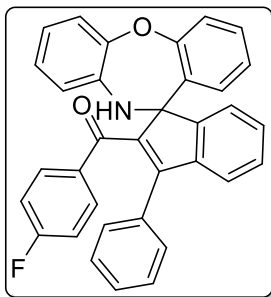

**Yield** 98% (97.1 mg); Yellow solid; **eluent composition** petroleum ether/ethyl acetate = 4:1; **mp** 114-116 °C; **<sup>1</sup>H NMR** (400 MHz, CDCl<sub>3</sub>) δ 7.52-7.46 (comp, 3H), 7.41 (app dd, *J* = 7.4, 1.0 Hz, 1H), 7.39-7.36 (comp, 2H), 7.29-7.25 (comp, 2H), 7.24-7.23 (comp, 3H), 7.20-7.16 (comp, 2H), 7.00-6.93 (comp, 2H), 6.88-6.86 (m, 1H), 6.85-6.82 (m, 1H), 6.75-6.68 (comp, 4H), 4.45 (br s, 1 N-H); **<sup>13</sup>C{<sup>1</sup>H} NMR** (100 MHz, CDCl<sub>3</sub>) δ 193.3, 166.2, 163.9, 163.7, 156.4, 151.9, 141.1 (x 2), 133.8 (d, *J* = 2.5 Hz), 132.7, 131.7, 131.6, 129.0 (x 2), 128.9 (x 2), 128.7,

128.6 , 128.4 (x 2), 124.7 , 124.6 , 123.7 (d,  $J = 3.6$  Hz), 123.6 , 123.0 , 122.0 , 120.9 , 114.8 , 114.6 , 76.0;  $^{19}\text{F}$  NMR (376 MHz,  $\text{CDCl}_3$ )  $\delta$  -106.27; HRMS (ESI,  $m/z$ ) calcd for  $\text{C}_{34}\text{H}_{23}\text{FNO}_2$   $[\text{M} + \text{H}]^+$  496.1713, found 496.1692.

**(3-chlorophenyl)(3'-phenyl-10*H*-spiro[dibenzo[*b,f*][1,4]oxazepine-11,1'-inden]-2'-yl)methanone (3o):**

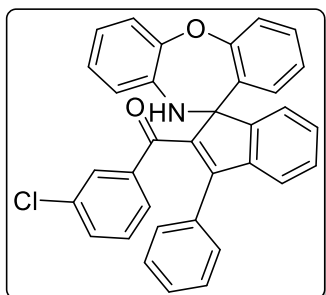

**Yield** 97% (99.3 mg); **Yellow solid; eluent composition** petroleum ether/ethyl acetate = 4:1; **mp** 178-180 °C;  $^1\text{H}$  NMR (400 MHz,  $\text{CDCl}_3$ )  $\delta$  7.50 (app d,  $J = 7.5$  Hz, 1H), 7.41 (app dd,  $J = 7.5, 1.0$  Hz, 1H), 7.38-7.36 (comp, 2H), 7.35-7.30 (comp, 3H), 7.29-7.20 (comp, 5H), 7.19-7.14 (comp, 3H), 7.02 (app d,  $J = 7.4$  Hz, 1H), 6.98 (app d,  $J = 7.9$  Hz, 1H), 6.96-6.92 (m, 1H), 6.89-6.80 (comp, 2H), 6.72 (app dd,  $J = 7.9, 1.6$  Hz, 1H), 6.67 (app d,  $J = 7.2$  Hz, 1H), 4.40 (s, 1 N-H);  $^{13}\text{C}\{^1\text{H}\}$  NMR (100 MHz,  $\text{CDCl}_3$ ) 193.2 , 156.4 , 151.9 , 151.8 , 140.9 , 139.1 , 138.0 , 133.6 , 132.7 , 131.8 , 129.2 , 129.0 , 128.9 (x 3) , 128.8 , 128.8 , 128.7 , 128.6 , 128.5 (x 2), 127.2 , 127.0 , 124.7 , 124.5 , 123.8 , 123.7 , 123.5 , 123.1 , 122.0 , 120.9 , 75.9; HRMS (ESI,  $m/z$ ) calcd for  $\text{C}_{34}\text{H}_{23}\text{ClNO}_2$   $[\text{M} + \text{H}]^+$  512.1417, found 512.1423.

**Figure S3.** X-ray crystal structure of **3o** (ellipsoid contour at 50% probability level)

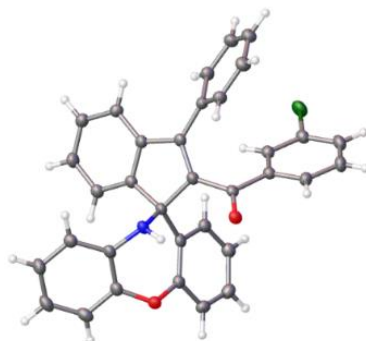

## Crystal data and structure refinement for 3o, CCDC No. 2226411

|                       |                                                   |                                             |                                                               |
|-----------------------|---------------------------------------------------|---------------------------------------------|---------------------------------------------------------------|
| Empirical formula     | C <sub>34</sub> H <sub>22</sub> ClNO <sub>2</sub> | $\rho_{\text{calc}}/\text{cm}^3$            | 1.376                                                         |
| Formula weight        | 511.97                                            | $\mu/\text{mm}^{-1}$                        | 1.634                                                         |
| Temperature/K         | 100.0                                             | F(000)                                      | 532.0                                                         |
| Crystal system        | triclinic                                         | Crystal size/mm <sup>3</sup>                | 0.4 × 0.25 × 0.2                                              |
| Space group           | P-1                                               | Radiation                                   | Cu K $\alpha$ ( $\lambda = 1.54178$ )                         |
| a/Å                   | 8.8279(9)                                         | 2 $\theta$ range for data collection/°      | 7.16 to 130.208                                               |
| b/Å                   | 11.8609(12)                                       | Index ranges                                | -9 ≤ h ≤ 10, -13 ≤ k ≤ 13, -15 ≤ l ≤ 15                       |
| c/Å                   | 13.5405(13)                                       | Reflections collected                       | 18829                                                         |
| $\alpha$ /°           | 68.435(4)                                         | Independent reflections                     | 4176 [R <sub>int</sub> = 0.0620, R <sub>sigma</sub> = 0.0473] |
| $\beta$ /°            | 73.562(3)                                         | Data/restraints/parameters                  | 4176/0/343                                                    |
| $\gamma$ /°           | 72.877(4)                                         | Goodness-of-fit on F <sup>2</sup>           | 1.023                                                         |
| Volume/Å <sup>3</sup> | 1235.5(2)                                         | Final R indexes [I ≥ 2 $\sigma$ (I)]        | R <sub>1</sub> = 0.0578, wR <sub>2</sub> = 0.2117             |
| Z                     | 2                                                 | Final R indexes [all data]                  | R <sub>1</sub> = 0.0661, wR <sub>2</sub> = 0.2241             |
|                       |                                                   | Largest diff. peak/hole / e Å <sup>-3</sup> | 0.47/-1.15                                                    |

### (3'-phenyl-10H-spiro[dibenzo[b,f][1,4]oxazepine-11,1'-inden]-2'-yl)(3-(trifluoromethyl)phenyl)methanone (3p):

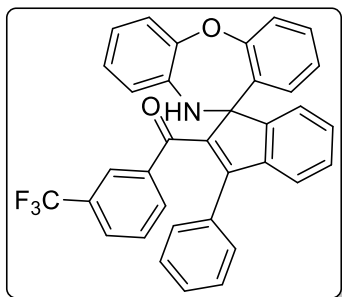

**Yield** 97% (105.8 mg); **Yellow solid**; **eluent composition** petroleum ether/ethyl acetate = 4:1; **mp** 188-190 °C; **<sup>1</sup>H NMR** (400 MHz, CDCl<sub>3</sub>)  $\delta$  7.65 (app d,  $J = 7.9$  Hz, 1H), 7.62 (app s, 1H), 7.51 (app d,  $J = 7.6$  Hz, 1H), 7.44-7.39 (comp, 3H), 7.34-7.31 (comp, 3H), 7.29 (app dd,  $J = 6.4, 1.1$  Hz, 1H), 7.24-7.15 (comp, 6H), 7.05 (d,  $J = 7.4$  Hz, 1H), 6.92 (m, 1H), 6.86 (app td,  $J = 7.7, 7.2, 1.3$  Hz, 1H), 6.79 (app td, 1H), 6.72 (app dd,  $J = 7.9, 1.5$  Hz, 1H), 6.66 (app d,  $J = 7.3$  Hz, 1H), 4.43 (br s, 1 N-H); **<sup>13</sup>C{<sup>1</sup>H} NMR** (100 MHz, CDCl<sub>3</sub>)  $\delta$  193.2, 156.4, 151.9, 140.9, 138.0, 132.5, 131.8, 130.0, 129.7, 129.0 (x 2), 129.0 (x 2), 128.8 (x 2), 128.5 (x 2), 128.5, 128.3, 128.2, 128.2, 127.1, 126.2 (q,  $J = 3.7$  Hz), 124.8, 124.5, 124.0, 123.7, 123.5, 123.2, 122.0, 120.9, 76.0; **<sup>19</sup>F NMR** (376 MHz, CDCl<sub>3</sub>)  $\delta$  -62.76; **HRMS** (ESI, m/z) calcd for C<sub>35</sub>H<sub>23</sub>F<sub>3</sub>NO<sub>2</sub> [M + H]<sup>+</sup> 546.1681, found 546.1671.

### (4-fluoro-3-methylphenyl)(3'-phenyl-10H-spiro[dibenzo[b,f][1,4]oxazepine-11,1'-inden]-2'-yl)methanone (3q):

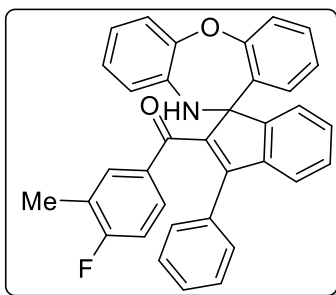

**Yield** 95% (96.8 mg); Yellow solid; **eluent composition** petroleum ether/ethyl acetate = 4:1; **mp** 142-144 °C;  $^1\text{H NMR}$  (400 MHz,  $\text{CDCl}_3$ )  $\delta$  7.50 (app d,  $J = 7.5$  Hz, 1H), 7.41-7.37 (comp, 3H), 7.33-7.27 (comp, 3H), 7.27-7.22 (comp, 4H), 7.20-7.14 (comp, 2H), 7.03 (app d,  $J = 7.4$  Hz, 1H), 6.92 (app td,  $J = 7.7, 1.5$  Hz, 1H), 6.88-6.81 (comp, 2H), 6.75 (app dd,  $J = 7.9, 1.6$  Hz, 1H), 6.68-6.63 (comp, 2H), 4.41 (br s, 1 N-H), 2.04 (d,  $J = 1.5$  Hz, 3H);  $^{13}\text{C}\{^1\text{H}\}$  NMR (100 MHz,  $\text{CDCl}_3$ )  $\delta$  193.4, 164.8, 162.2, 156.5, 151.7, 147.4, 146.3, 141.0, 138.0, 133.5 (d,  $J = 2.8$  Hz), 133.0, 133.0 (d,  $J = 3.1$  Hz), 129.0, 129.0, 128.9, 128.8, 128.7 (d,  $J = 2.2$  Hz), 128.6, 128.5, 128.4, 124.6, 124.4, 124.2, 124.0, 123.6, 123.4, 122.8, 122.0, 120.9, 114.4, 114.2, 75.9, 14.2 (d,  $J = 3.3$  Hz);  $^{19}\text{F NMR}$  (376 MHz,  $\text{CDCl}_3$ )  $\delta$  -110.54; **HRMS** (ESI,  $m/z$ ) calcd for  $\text{C}_{35}\text{H}_{25}\text{FNO}_2$  [ $\text{M} + \text{H}$ ] $^+$  510.1869, found 510.1872.

**furan-2-yl(3'-phenyl-10*H*-spiro[dibenzo[*b,f*][1,4]oxazepine-11,1'-inden]-2'-yl)methanone (3r):**

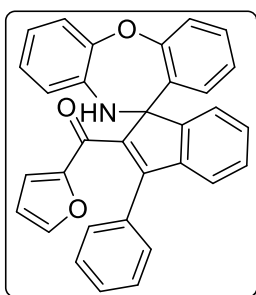

**Yield** 99% (97.7 mg); Yellow solid; **eluent composition** petroleum ether/ethyl acetate = 4:1; **mp** 162-164 °C;  $^1\text{H NMR}$  (400 MHz,  $\text{CDCl}_3$ )  $\delta$  7.50 (app d,  $J = 7.5$  Hz, 1H), 7.48-7.46 (comp, 2H), 7.38 (app dd,  $J = 7.5, 1.1$  Hz, 1H), 7.35-7.27 (comp, 5H), 7.24 (app dd,  $J = 7.5, 1.1$  Hz, 1H), 7.22-7.16 (comp, 2H), 7.13 (app dd,  $J = 1.6, 0.7$  Hz, 1H), 6.99-6.93 (comp, 2H), 6.86-6.82 (comp, 2H), 6.78 (app dd,  $J = 7.9, 1.8$  Hz, 1H), 6.67 (app dd,  $J = 3.6, 0.7$  Hz, 1H), 6.15 (app dd,  $J = 3.6, 1.7$  Hz, 1H), 4.34 (br s, 1 N-H);  $^{13}\text{C}\{^1\text{H}\}$  NMR (100 MHz,  $\text{CDCl}_3$ )  $\delta$  181.7, 156.2, 152.9, 151.9, 151.7, 146.7, 146.6, 145.7, 140.8, 138.1, 133.2, 128.9, 128.7, 128.6, 128.6 (x 2), 128.5, 128.5, 126.8, 124.5, 124.7, 123.6, 123.3, 123.2, 122.8, 122.0, 120.9, 118.3, 111.8, 76.0; **HRMS** (ESI,  $m/z$ ) calcd for  $\text{C}_{32}\text{H}_{22}\text{NO}_3$  [ $\text{M} + \text{H}$ ] $^+$  468.1600, found 468.1582.

**1-(3'-phenyl-10*H*-spiro[dibenzo[*b,f*][1,4]oxazepine-11,1'-inden]-2'-yl)ethan-1-one (3s):**

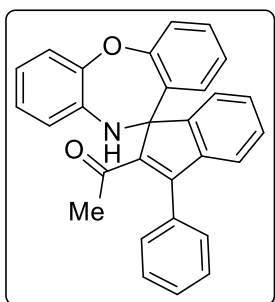

**Yield** 97% (83.1 mg); Yellow solid; **eluent composition** petroleum ether/ethyl acetate = 4:1; **mp** 164-166 °C;  $^1\text{H NMR}$  (400 MHz,  $\text{CDCl}_3$ )  $\delta$  7.56-7.54 (m, 1H), 7.53-7.52 (comp, 3H), 7.50-7.47 (m, 1H), 7.37-7.32 (comp, 2H), 7.28-7.22 (comp, 2H), 7.20-7.16 (m, 1H), 7.13-7.08 (comp, 2H), 7.02 (app td,  $J = 7.5, 1.5$  Hz, 1H), 6.84 (app td,  $J = 7.6, 1.3$  Hz, 1H), 6.72 (app d,  $J = 7.5$  Hz, 1H), 6.67 (app dd,  $J = 7.9, 1.6$  Hz, 1H), 6.47 (app d,  $J = 7.5$  Hz, 1H), 4.141 (br s, 1 N-H), 2.012 (s, 3H);  $^{13}\text{C}\{^1\text{H}\}$  NMR (100 MHz,  $\text{CDCl}_3$ )  $\delta$  197.2, 155.5, 153.4, 152.0, 151.6, 147.2, 141.5, 138.3, 133.7, 129.1, 128.9, 128.7, 128.5, 128.5 (x 2), 128.3,

126.9, 124.9, 124.8, 124.6, 124.1, 123.9, 123.7, 122.3, 121.0, 74.1, 30.8; **HRMS** (ESI, m/z) calcd for C<sub>29</sub>H<sub>22</sub>NO<sub>2</sub> [M + H]<sup>+</sup> 416.1651, found 416.1653.

**3-methyl-1-(3'-phenyl-10H-spiro[dibenzo[*b,f*][1,4]oxazepine-11,1'-inden]-2'-yl)butan-1-one (3t):**

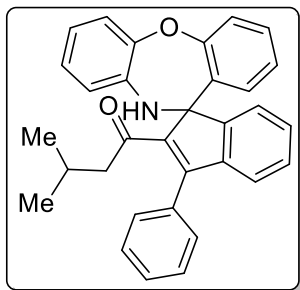

**Yield** 80% (73.2 mg); Yellow solid; **eluent composition** petroleum ether/ethyl acetate = 4:1; **mp** 136 °C; **<sup>1</sup>H NMR** (400 MHz, CDCl<sub>3</sub>) δ 7.54-7.45 (comp, 5H), 7.32 (comp, 2H), 7.25-7.20 (comp, 2H), 7.18-7.14 (m, 1H), 7.12-7.05 (comp, 2H), 7.01 (app td, *J* = 7.5, 1.5 Hz, 1H), 6.84-6.80 (m, 1H), 6.73 (app d, *J* = 7.6 Hz, 1H), 6.64 (app dd, *J* = 7.9, 1.6 Hz, 1H), 6.43 (app d, *J* = 7.5 Hz, 1H), 2.27 (dd, *J* = 16.5, 6.8 Hz, 1H), 2.10 (dd, *J* = 16.5, 6.8 Hz, 1H), 1.88 (dt, *J* = 13.3, 6.7 Hz, 1H), 0.60 (d, *J* = 6.6 Hz, 3H), 0.53 (d, *J* = 6.6 Hz, 3H); **<sup>13</sup>C{<sup>1</sup>H} NMR** (100 MHz, CDCl<sub>3</sub>) δ 200.3, 155.6, 153.7, 151.8, 150.3, 147.7, 141.6, 138.3, 133.7, 128.8 (x 2), 128.6 (x2), 128.5 (x 2), 128.4, 128.2, 126.9, 125.3, 124.8, 124.6, 124.1, 123.6, 122.1, 120.9, 74.2, 51.3, 24.1, 22.3, 22.2; **HRMS** (ESI, m/z) calcd for C<sub>32</sub>H<sub>28</sub>NO<sub>2</sub> [M + H]<sup>+</sup> 458.2120, found 458.2112.

**2,2-dimethyl-1-(3'-phenyl-10H-spiro[dibenzo[*b,f*][1,4]oxazepine-11,1'-inden]-2'-yl)propan-1-one (3u):**

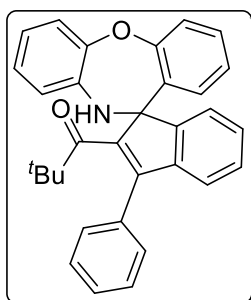

**Yield** 97% (88.8 mg); White solid; **eluent composition** petroleum ether/ethyl acetate = 4:1; **mp** 176 °C; **<sup>1</sup>H NMR** (400 MHz, CDCl<sub>3</sub>) δ 7.50-7.41 (comp, 5H), 7.36 (app d, *J* = 7.4 Hz, 1H), 7.31-7.27 (comp, 2H), 7.26-7.18 (comp, 2H), 7.10 (app td, *J* = 7.4, 1.1 Hz, 1H), 7.05-6.99 (comp, 2H), 6.92-6.88 (m, 1H), 6.76 (comp, 2H), 6.65 (app d, *J* = 7.5 Hz, 1H), 3.91 (br s, 1 N-H), 0.77 (s, 9H); **<sup>13</sup>C{<sup>1</sup>H} NMR** (100 MHz, CDCl<sub>3</sub>) δ 213.5, 156.5, 152.6, 141.1, 133.8, 130.5, 128.9 (x 5), 128.8 (x 4), 128.2, 127.3, 126.1, 125.0, 123.7, 123.6, 123.5, 122.0, 121.7, 120.9, 76.2, 44.7, 26.9; **HRMS** (ESI, m/z) calcd for C<sub>32</sub>H<sub>28</sub>NO<sub>2</sub> [M + H]<sup>+</sup> 458.2120, found 458.2119.

**cyclohexyl(3'-phenyl-10H-spiro[dibenzo[*b,f*][1,4]oxazepine-11,1'-inden]-2'-yl)methanone (3v):**

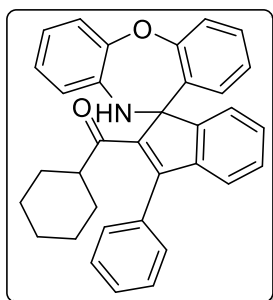

**Yield** 88% (84.8 mg); Greenish-yellow solid; **eluent composition** petroleum ether/ethyl acetate = 4:1; **mp** 74-76 °C; **<sup>1</sup>H NMR** (400 MHz, CDCl<sub>3</sub>) δ 7.52-7.48 (comp, 5H), 7.35 (app dd, *J* = 8.2, 1.2 Hz, 1H), 7.32 (app dd, *J* = 7.9, 1.4 Hz, 1H), 7.28-7.22 (comp, 2H), 7.19-7.15 (m, 1H), 7.11-7.07 (comp, 2H), 7.04-7.00 (m, 1H), 6.85-6.81 (m, 1H), 6.72 (app d, *J* = 7.4 Hz, 1H), 6.67 (app dd, *J* = 7.9, 1.6 Hz, 1H), 6.48 (app d, *J* = 16.0 Hz, 1H), 4.14 (br s, 1 N-H), 2.57 (tt, *J* = 11.5,



3.0 Hz, 1H), 1.56-1.43 (m, 4H), 1.30-1.26 (m, 1H), 1.14-1.03 (m, 2H), 1.01-0.92 (m, 1H), 0.89-0.79 (m, 1H), 0.73-0.61 (m, 1H);  $^{13}\text{C}\{^1\text{H}\}$  NMR (100 MHz,  $\text{CDCl}_3$ )  $\delta$  204.0, 155.6, 153.8, 152.2, 150.7, 147.4 (x 2), 141.6, 138.5, 133.9, 129.1, 128.8, 128.8, 128.6, 128.4, 128.4, 128.2, 126.9, 125.2, 124.8, 124.5, 124.1, 123.5, 122.2, 121.0, 74.4, 48.6, 28.7, 28.3, 25.8, 25.7, 25.6; **HRMS** (ESI,  $m/z$ ) calcd for  $\text{C}_{34}\text{H}_{30}\text{NO}_2$   $[\text{M} + \text{H}]^+$  484.2277, found 484.2261.

**1-(3'-butyl-10*H*-spiro[dibenzo[*b,f*][1,4]oxazepine-11,1'-inden]-2'-yl)-2,2-dimethylpropan-1-one (3w):**

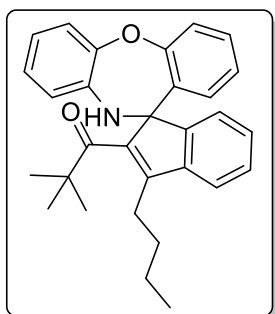

**Yield** 86% (76 mg); Yellowish gel; **eluent composition** petroleum ether/ethyl acetate = 99:1 to 19:1;  $^1\text{H}$  NMR (400 MHz,  $\text{CDCl}_3$ )  $\delta$  7.34 (d,  $J = 7.4$  Hz, 1H), 7.29-7.19 (comp, 3H), 7.17-7.13 (m, 1H), 7.02-6.97 (comp, 3H), 6.87-6.83 (m, 1H), 6.68-6.62 (comp, 2H), 6.45 (d,  $J = 7.5$  Hz, 1H), 3.54 (br s, 1 N-H), 2.53-2.41 (comp, 2H), 1.73-1.65 (comp, 2H), 1.50-1.40 (comp, 2H), 1.09 (s, 9H), 0.97 (t,  $J = 7.3$  Hz, 3H);  $^{13}\text{C}\{^1\text{H}\}$  NMR (100 MHz,  $\text{CDCl}_3$ )  $\delta$  213.1, 155.8, 152.6, 152.3, 150.4, 142.4, 141.1, 138.4, 133.1, 130.8, 128.6, 127.9, 126.9, 125.8, 124.9, 123.4, 123.4, 123.2, 121.8, 120.9, 120.8, 75.7, 44.5, 30.6, 27.5, 26.6, 23.2, 13.9; **HRMS** (ESI,  $m/z$ ) calcd for  $\text{C}_{30}\text{H}_{32}\text{NO}_2$   $[\text{M} + \text{H}]^+$  438.2433, found 438.2436.

**(*E*)-3-phenyl-1-(3'-phenyl-10*H*-spiro[dibenzo[*b,f*][1,4]oxazepine-11,1'-inden]-2'-yl)prop-2-en-1-one (3x):**

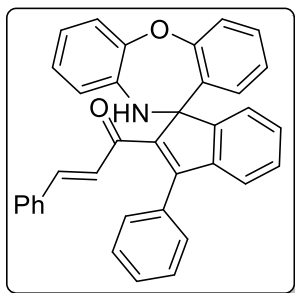

**Yield** 97% (97.7 mg); Yellow solid; **eluent composition** petroleum ether/ethyl acetate = 4:1; **mp** 150-152 °C;  $^1\text{H}$  NMR (400 MHz,  $\text{CDCl}_3$ )  $\delta$  7.61-7.50 (comp, 5H), 7.39-7.37 (m, 1H), 7.36-7.32 (comp, 3H), 7.31-7.27 (comp, 2H), 7.25-7.23 (m, 1H), 7.18-7.13 (comp, 4H), 7.08 (app td,  $J = 7.5, 1.2$  Hz, 1H), 7.01 (app td,  $J = 7.5, 1.3$  Hz, 1H), 6.92 (app d,  $J = 15.7$  Hz, 1H), 6.83 (app td,  $J = 7.6, 7.2, 1.3$  Hz, 1H), 6.75 (app d,  $J = 5.4$  Hz, 1H), 6.70 (app dd,  $J = 7.9, 1.6$  Hz, 1H), 6.61 (app d,  $J = 7.5$  Hz, 1H), 4.30 (br s, 1 N-H);  $^{13}\text{C}\{^1\text{H}\}$  NMR (100 MHz,  $\text{CDCl}_3$ )  $\delta$  188.0, 155.6, 153.5, 141.6, 141.4, 135.1, 133.8, 129.9, 129.2, 129.0, 128.9 (x 2), 128.7 (x 2), 128.6, 128.6 (x 3), 128.4, 128.2 (x 2), 127.2, 125.8, 125.1, 124.8, 124.3, 123.8, 123.7, 122.2, 121.0, 74.4; **HRMS** (ESI,  $m/z$ ) calcd for  $\text{C}_{36}\text{H}_{26}\text{NO}_2$   $[\text{M} + \text{H}]^+$  504.1964, found 504.1940.

**Figure S4.** X-ray crystal structure of **3x** (ellipsoid contour at 50% probability level)

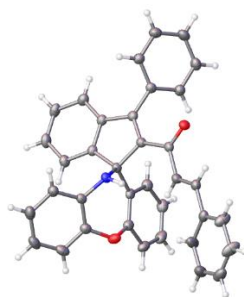

### Crystal data and structure refinement for 3x, CCDC No. 2226412

|                                             |                                                               |
|---------------------------------------------|---------------------------------------------------------------|
| Empirical formula                           | C <sub>36</sub> H <sub>25</sub> NO <sub>2</sub>               |
| Formula weight                              | 503.57                                                        |
| Temperature/K                               | 101.0                                                         |
| Crystal system                              | triclinic                                                     |
| Space group                                 | P-1                                                           |
| a/Å                                         | 10.6943(5)                                                    |
| b/Å                                         | 11.3031(6)                                                    |
| c/Å                                         | 12.5505(6)                                                    |
| α/°                                         | 70.5720(10)                                                   |
| β/°                                         | 89.8510(10)                                                   |
| γ/°                                         | 66.3090(10)                                                   |
| Volume/Å <sup>3</sup>                       | 1294.96(11)                                                   |
| Z                                           | 2                                                             |
| ρ <sub>calc</sub> /cm <sup>3</sup>          | 1.291                                                         |
| μ/mm <sup>-1</sup>                          | 0.623                                                         |
| F(000)                                      | 528.0                                                         |
| Crystal size/mm <sup>3</sup>                | 0.6 × 0.25 × 0.2                                              |
| Radiation                                   | Cu Kα (λ = 1.54178)                                           |
| 2θ range for data collection/°              | 9.814 to 136.382                                              |
| Index ranges                                | -12 ≤ h ≤ 12, -12 ≤ k ≤ 13, -15 ≤ l ≤ 15                      |
| Reflections collected                       | 55903                                                         |
| Independent reflections                     | 4562 [R <sub>int</sub> = 0.0461, R <sub>sigma</sub> = 0.0253] |
| Data/restraints/parameters                  | 4562/0/352                                                    |
| Goodness-of-fit on F <sup>2</sup>           | 1.038                                                         |
| Final R indexes [I ≥ 2σ (I)]                | R <sub>1</sub> = 0.0492, wR <sub>2</sub> = 0.1218             |
| Final R indexes [all data]                  | R <sub>1</sub> = 0.0495, wR <sub>2</sub> = 0.1221             |
| Largest diff. peak/hole / e Å <sup>-3</sup> | 0.71/-0.71                                                    |

**ethyl 2-oxo-2-(3'-phenyl-10*H*-spiro[dibenzo[*b,f*][1,4]oxazepine-11,1'-inden]-2'-yl)acetate (3y):**

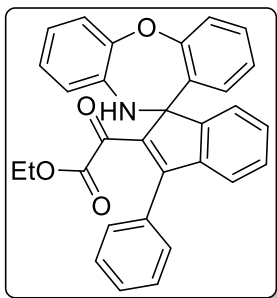

**Yield** 81% (76.7 mg); Yellow solid; **eluent composition** petroleum ether/ethyl acetate = 4:1; **mp** 82-84 °C; **<sup>1</sup>H NMR** (400 MHz, CDCl<sub>3</sub>) δ 7.56-7.52 (comp, 5H), 7.40 (app d, *J* = 7.5 Hz, 1H), 7.36 (app dd, *J* = 3.6, 1.1 Hz, 1H), 7.34 (app dd, *J* = 2.8, 1.1 Hz, 1H), 7.32-7.29 (m, 1H), 7.24 (app td, *J* = 7.5, 1.2 Hz, 1H), 7.20-7.16 (m, 1H), 7.06 (app td, *J* = 7.7, 1.6 Hz, 1H), 6.97 (app td, *J* = 7.5, 1.5 Hz, 1H), 6.86 (app d, *J* = 7.5 Hz, 1H), 6.84-6.80 (m, 1H), 6.74 (app dd, *J* = 7.7, 1.5 Hz, 1H), 6.67 (app dd, *J* = 7.9, 1.6 Hz, 1H), 3.60 (q, *J* = 7.2 Hz, 2H), 1.03 (t, *J* = 7.2 Hz, 3H); **<sup>13</sup>C{<sup>1</sup>H} NMR** (100 MHz, CDCl<sub>3</sub>) δ 184.0, 163.1, 156.4, 155.6, 152.9, 152.8, 143.1, 140.2, 138.1, 132.0, 131.2, 130.3, 129.9, 129.1, 128.7, 128.6, 128.0, 126.5, 124.7, 124.7, 124.2, 124.2 (x 2), 123.5, 122.2, 121.0, 74.4, 61.7, 13.5; **HRMS** (ESI, *m/z*) calcd for C<sub>31</sub>H<sub>24</sub>NO<sub>4</sub> [M + H]<sup>+</sup> 474.1705, found 474.1716.

**(8*R*,9*S*,13*S*,14*S*)-3-((2'-benzoyl-10*H*-spiro[dibenzo[*b*,*f*][1,4]oxazepine-11,1'-inden]-3'-yl)methoxy)-13-methyl-6,7,8,9,11,12,13,14,15,16-decahydro-17*H*-cyclopenta[*a*]phenanthren-17-one (3z):**

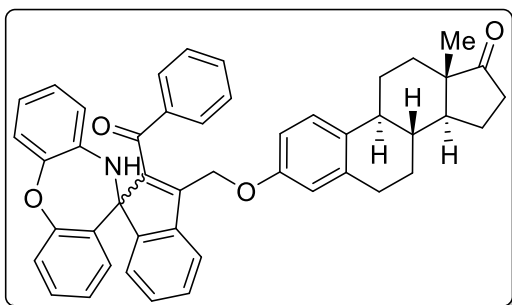

**Combined yield** 73% (100.4 mg, dr 100:97 calculated from <sup>1</sup>H-NMR); Inseparable diastereomeric mixture; Yellow solid; **eluent composition** petroleum ether/ethyl acetate = 4:1; **mp** 120-122 °C; **<sup>1</sup>H NMR** (400 MHz, CDCl<sub>3</sub>) δ 7.68-7.64 (comp, 6H), 7.43-7.39 (comp, 4H), 7.29-7.23 (comp, 9H), 7.16-7.12 (comp, 6H), 7.06-7.02 (comp, 4H), 6.87-6.84 (comp, 2H), 6.82-6.77 (comp, 4H), 6.63-6.59 (comp, 6H), 6.54-6.53 (comp, 2H), 4.89-4.82 (m, 4H), 4.24 (br s, 1.30 N-H), 2.87-2.74 (m, 4H), 2.54-2.47 (m, 2H), 2.40-2.34 (m, 2H), 2.24-2.04 (m, 7H), 2.01-1.93 (m, 4H), 1.67-1.57 (m, 4H), 1.54-1.50 (m, 4H), 1.47-1.34 (m, 4H), 0.91 (s, 3H), 0.90 (s, 2.92H); **<sup>13</sup>C{<sup>1</sup>H} NMR** (100 MHz, CDCl<sub>3</sub>) δ 220.8, 194.4, 156.5, 156.1, 150.7, 140.3, 138.3, 137.8, 132.8, 132.7, 129.0, 128.9 (x 2), 128.7, 128.5, 128.1 (x 2), 126.8, 126.3 (x 2), 124.5, 124.3, 123.4, 123.0, 122.9, 121.8, 120.9 (x 2), 114.7, 114.7, 112.6, 112.5, 76.2, 63.1, 50.4, 48.0, 44.0, 38.3, 35.83, 31.5, 29.5, 26.4, 25.8, 21.6, 13.8; **HRMS** (ESI, *m/z*) calcd for C<sub>47</sub>H<sub>42</sub>NO<sub>4</sub> [M + H]<sup>+</sup> 684.3114, found 684.3115.

**(3'-((((3*S*,8*S*,9*S*,10*R*,13*R*,14*S*,17*R*)-10,13-dimethyl-17-((*R*)-6-methylheptan-2-yl)-2,3,4,7,8,9,10,11,12,13,14,15,16,17-tetradecahydro-1*H*-cyclopenta[*a*]phenanthren-3-yl)oxy)methyl)-10*H*-spiro[dibenzo[*b*,*f*][1,4]oxazepine-11,1'-inden]-2'-yl)(phenyl)methanone (3za):**

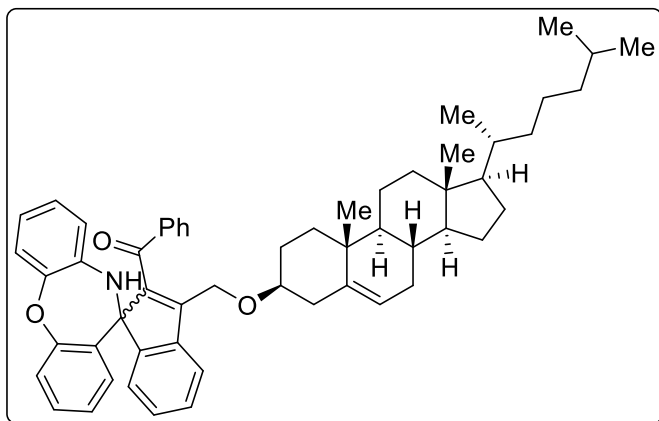

**Yield of isolated diastereomer (3za)** 33% (53 mg); Yellowish gel; **eluent composition**

petroleum ether/ethyl acetate = 49:1 to 19:1; **<sup>1</sup>H NMR of 3za** (400 MHz, CDCl<sub>3</sub>) δ 7.73-7.71 (comp, 2H), 7.64 (app d, *J* = 7.5 Hz, 1H), 7.48-7.44 (m, 1H), 7.42-7.38 (m, 1H), 7.33-7.29 (comp, 2H), 7.25-7.22 (m, 1H), 7.19-7.12 (m, 2H),

7.08 (app d, *J* = 7.8 Hz, 1H), 6.97-6.94 (m, 1H), 6.88- 6.76 (comp, 3H), 6.67-6.65 (m, 1H), 6.59-6.57 (m, 1H), 5.25-5.24 (m, 1H), 4.34 (s, 2H), 3.10-3.01 (m, 1H), 2.21-2.13 (m, 1H), 2.09 (d, *J* = 11.8 Hz, 1H), 2.04-1.87 (comp, 4H), 1.86-1.70 (comp, 5H), 1.58-1.42 (comp, 10H), 1.39 (s, 2H), 1.36-1.32 (comp, 4H), 1.26-1.24 (comp, 2H), 1.23-1.21 (comp, 2H), 1.15 (d, *J* = 9.7 Hz, 2H), 1.13-1.07 (comp, 6H), 1.05-0.98 (comp, 4H), 0.95 (s, 3H), 0.91 (d, *J* = 6.5 Hz, 3H), 0.87 (d, *J* = 1.7 Hz, 3H), 0.86 (d, *J* = 1.7 Hz, 3H), 0.67 (s, 3H); **<sup>13</sup>C{<sup>1</sup>H} NMR of 3za** (100 MHz, CDCl<sub>3</sub>) δ 194.5 , 156.4 , 140.8 , 140.6 , 140.5 , 138.5 , 132.7 , 129.1 , 128.9 , 128.8 , 128.8 , 128.6 , 128.4 , 128.2 , 128.0 , 124.5 , 124.2 , 123.4 , 123.2 , 121.8 (x 3), 120.9 , 79.6 , 79.5 , 76.2 , 62.7, 56.7 , 56.1 , 50.1 , 42.3 , 39.8 , 39.5 , 38.8 , 38.6 , 37.1 , 37.1 , 36.8 , 36.6 , 36.2 , 35.8 , 31.9 , 31.8 , 28.2 , 28.1 , 28.0 (x 2) , 24.7 , 24.3 , 23.8 , 23.3 , 22.8 , 22.6 , 21.0 , 19.3 , 18.7 , 11.8; **HRMS** (ESI, *m/z*) calcd for C<sub>56</sub>H<sub>66</sub>NO<sub>3</sub> [M + H]<sup>+</sup> 800.5037, found 800.5016.

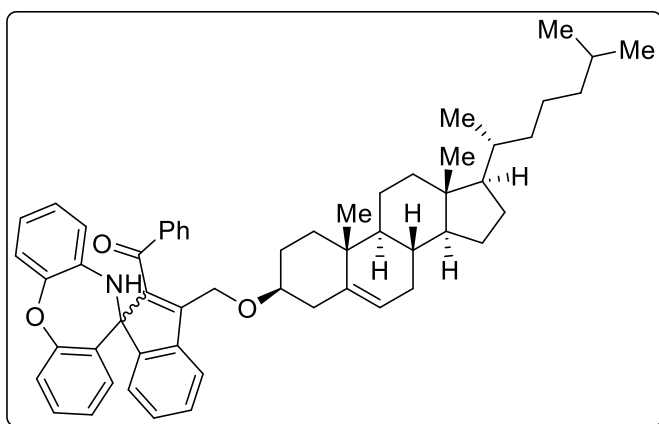

**Yield of other isolated diastereomer (3za')** 20% (32.2 mg); Yellowish gel; **eluent composition**

petroleum ether/ethyl acetate = 49:1 to 19:1; **<sup>1</sup>H NMR of 3za'** (400 MHz, CDCl<sub>3</sub>) δ 8.05 (app d, *J* = 7.6 Hz, 2H), 7.63-7.57 (m, 1H), 7.52-7.48 (comp, 2H), 7.34 (app d, *J* = 7.9 Hz, 1H), 7.29 (dd, *J* = 7.1, 2.1 Hz,

1H), 7.25-7.17 (comp, 3H), 7.13 (app d, *J* = 7.3 Hz, 1H), 7.08-6.98 (comp, 3H), 6.96-6.91 (m, 1H), 6.78 (d, *J* = 7.9 Hz, 1H), 6.66 (d, *J* = 7.5 Hz, 1H), 5.10 (dd, *J* = 19.0, 5.1 Hz, 1H), 4.38 (d, *J* = 15.2 Hz, 1H), 3.99 (d, *J* = 15.2 Hz, 1H), 2.82-2.74 (m, 1H), 1.99-1.67 (comp, 7H), 1.65-1.47 (comp, 8H), 1.46-1.30 (comp, 11H), 1.26-1.21 (comp, 4H), 1.17-0.92 (comp, 14H), 0.91-0.84 (comp, 14H), 0.79 (s, 3H), 0.63 (s, 3H). **<sup>13</sup>C NMR** (100 MHz, CDCl<sub>3</sub>) δ 194.8 , 155.9 (x 2) , 151.7 , 140.8 , 140.6 (x 2) , 137.7 , 137.6 , 133.4 , 129.2 , 129.1 , 128.8 , 128.6 , 128.4 , 126.6 , 125.9 , 125.1 , 123.9 , 123.7 , 123.2 , 122.2 , 121.4 , 121.3 , 121.2 , 121.1 , 79.2 , 74.6 , 74.6 , 63.0 , 56.7 , 56.1 , 50.0 , 42.3 , 39.7 , 39.5 , 37.8 (x 2)

, 36.9 , 36.6 (x 2) , 36.2 , 35.8 , 31.8 (x 2) , 29.7 , 28.2 , 28.0 , 27.2 , 27.1 , 24.7 , 24.2 , 23.8 (x 2) , 22.5 , 21.0 , 19.2 , 18.7 , 11.8.

**phenyl(3'-((((S)-2,5,7,8-tetramethyl-2-((4S,8S)-4,8,12-trimethyltridecyl)chroman-6-yl)oxy)methyl)-10H-spiro[dibenzo[b,f][1,4]oxazepine-11,1'-inden]-2'-yl)methanone (3zb):**

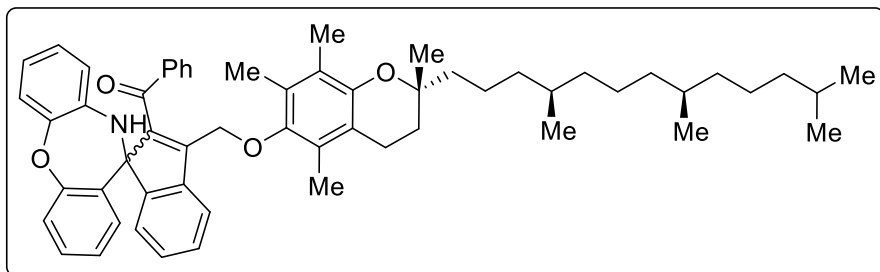

**Combined yield** 90% (152 mg, dr 100:2; calculated from  $^1\text{H-NMR}$ ); Inseparable diastereomeric mixture;

Yellowish gel; **eluent composition** petroleum ether/ethyl acetate = 19:1 to 9:1;  $^1\text{H NMR}$  (400 MHz,  $\text{CDCl}_3$ )  $\delta$  7.81 (d,  $J = 7.5$  Hz, 1H), 7.56-7.54 (m, 2H), 7.45 (app td,  $J = 7.6, 1.3$  Hz, 1H), 7.38-7.35 (m, 1H), 7.31-7.27 (m, 1H), 7.20-7.14 (comp, 3H), 7.11-7.02 (comp, 3H), 6.91-6.84 (comp, 3H), 6.78 (dd,  $J = 8.0, 1.7$  Hz, 1H), 6.70-6.63 (m, 1H), 4.71 (d,  $J = 13.1$  Hz, 1H), 4.61 (d,  $J = 13.1$  Hz, 1H), 2.57 (t,  $J = 7.2$  Hz, 0.06H), 2.48 (t,  $J = 6.9$  Hz, 2H), 2.02 (s, 3H), 2.01 (s, 3H), 1.97 (s, 3H), 1.78-1.68 (comp, 2H), 1.54-1.50 (comp, 2H), 1.42-1.34 (comp, 4H), 1.28-1.23 (comp, 7H), 1.20 (s, 3H), 1.16-1.13 (comp, 3H), 1.11-1.04 (comp, 5H), 0.88 (s, 3H), 0.86 (s, 3H), 0.85 (s, 3H), 0.84 (s, 3H), 0.72 (s, 0.05H), 0.71 (s, 0.05H), 0.70 (s, 0.04H), 0.68 (s, 0.05H);  $^{13}\text{C}\{^1\text{H}\}$  NMR (100 MHz,  $\text{CDCl}_3$ )  $\delta$  195.0 , 156.9 , 156.9 , 150.5 , 149.9 , 148.1 , 148.0 , 140.9 , 140.8 , 138.3 , 132.4 , 129.2 , 129.1 , 128.9 , 128.7 , 128.2 , 127.9 , 127.7 , 127.1 , 125.8 , 124.6 , 124.3 , 123.7 , 123.0 , 122.9 , 122.3 , 121.8 , 121.0 , 117.6 , 76.0 , 74.8 , 67.8 , 40.1 , 40.0 , 39.4 , 37.5 , 37.4 , 37.4 , 37.3 , 37.3 , 32.8 , 32.7 , 31.2 , 31.1 , 28.0 , 24.8 , 24.4 , 23.8 , 22.7 , 22.6 , 21.0 , 20.6 , 19.7 , 19.7 , 19.6 , 19.6 , 19.6 , 13.0 , 12.1 , 11.7; **HRMS** (ESI,  $m/z$ ) calcd for  $\text{C}_{58}\text{H}_{70}\text{NO}_4$   $[\text{M} + \text{H}]^+$  844.5299, found 844.5270.

**(8-chloro-3'-phenyl-10H-spiro[dibenzo[b,f][1,4]oxazepine-11,1'-inden]-2'-yl)(phenyl)methanone (4a):**

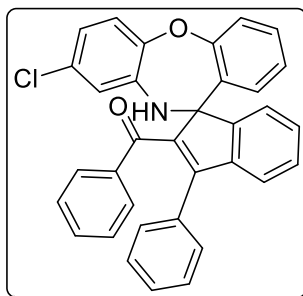

**Yield** 98% (100.8 mg); Yellow solid; **eluent composition** petroleum ether/ethyl acetate = 9:1; **mp** 216-218 °C;  $^1\text{H NMR}$  (400 MHz,  $\text{CDCl}_3$ )  $\delta$  7.51-7.48 (comp, 3H), 7.41 (app td,  $J = 7.6, 1.1$  Hz, 1H), 7.36-7.31 (comp, 3H), 7.25-7.22 (comp, 2H), 7.20-7.16 (comp, 5H), 7.08-7.03 (comp, 3H), 6.91-6.87 (m, 1H), 6.81-6.77 (comp, 2H), 6.59 (app d,  $J = 2.4$  Hz, 1H), 4.38 (br s, 1 N-H);  $^{13}\text{C}\{^1\text{H}\}$  NMR (100 MHz,  $\text{CDCl}_3$ )  $\delta$  194.8 , 156.3 , 151.2 , 149.2 , 147.1 , 146.1 , 141.0 , 139.1 , 137.2 , 132.7 , 132.3 , 129.2 , 129.1 , 129.0 , 128.9 (x 2), 128.8 , 128.7 , 128.5 , 128.4 ,

127.7 , 127.5 , 124.5 , 123.8 , 122.9 , 122.6 , 122.3 , 122.0 , 121.8 , 75.8; **HRMS** (ESI, m/z) calcd for C<sub>34</sub>H<sub>23</sub>ClNO<sub>2</sub> [M + H]<sup>+</sup> 512.1417, found 512.1428.

**(4-methyl-3'-phenyl-10*H*-spiro[dibenzo[*b,f*][1,4]oxazepine-11,1'-inden]-2'-yl)(phenyl)methanone (4b):**

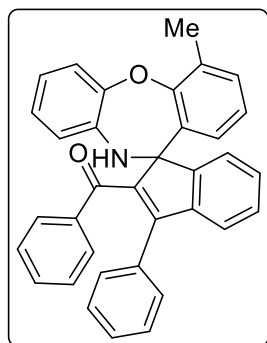

**Yield** 99% (98.0 mg); Yellow solid; **eluent composition** petroleum ether/ethyl acetate = 9:1; **mp** 84-86 °C; **<sup>1</sup>H NMR** (400 MHz, CDCl<sub>3</sub>) δ 7.49-7.47 (comp, 3H), 7.40-7.37 (comp, 3H), 7.29 (td, *J* = 7.5, 1.1 Hz, 1H), 7.25-7.19 (comp, 4H), 7.14 (app dd, *J* = 7.5, 2.0 Hz, 1H), 7.11 (app d, *J* = 7.6 Hz, 1H), 7.07-7.03 (comp, 3H), 6.91-6.83 (comp, 2H), 6.79-6.75 (m, 1H), 6.68-6.65 (comp, 2H), 4.55 (br s, 1 N-H), 2.41 (s, 3H); **<sup>13</sup>C{<sup>1</sup>H} NMR** (100 MHz, CDCl<sub>3</sub>) δ 195.2 , 155.3 , 151.6 , 150.7 , 147.5 , 145.6 , 141.1 , 138.5 , 137.6 , 132.9 , 131.9 , 130.7 , 130.3 , 129.1 (x 2), 129.0 , 128.6 , 128.3 (x 2), 127.8 , 127.5 , 126.2 , 124.6 , 124.5 , 123.2 , 122.8 , 122.8 , 122.7 , 121.4 , 75.9 , 17.3; **HRMS** (ESI, m/z) calcd for C<sub>35</sub>H<sub>26</sub>NO<sub>2</sub> [M + H]<sup>+</sup> 492.1964, found 492.1965.

**(4-bromo-3'-phenyl-10*H*-spiro[dibenzo[*b,f*][1,4]oxazepine-11,1'-inden]-2'-yl)(phenyl)methanone (4c):**

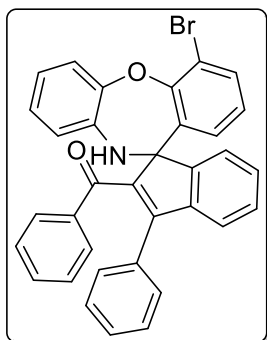

**Yield** 96% (106.8 mg); Yellow solid; **eluent composition** petroleum ether/ethyl acetate = 9:1; **mp** 192-194 °C; **<sup>1</sup>H NMR** (400 MHz, CDCl<sub>3</sub>) δ 7.49 (comp, 2H), 7.47-7.44 (comp, 2H), 7.42-7.38 (comp, 2H), 7.37-7.35 (comp, 2H), 7.28 (app dd, *J* = 7.6, 1.2 Hz, 1H), 7.25-7.24 (m, 1H), 7.23-7.19 (comp, 3H), 7.07-7.00 (comp, 3H), 6.94 (app td, *J* = 7.7, 1.5 Hz, 1H), 6.85 (app td, *J* = 7.6, 1.6 Hz, 1H), 6.76-6.70 (comp, 2H), 6.65 (app d, *J* = 7.2 Hz, 1H), 4.48 (br s, 1 N-H); **<sup>13</sup>C{<sup>1</sup>H} NMR** (100 MHz, CDCl<sub>3</sub>) δ 194.7 , 153.0 , 151.6 , 151.4 , 146.9 , 140.9 , 138.0 , 137.4 , 132.7 , 132.6 , 132.1 , 130.1 , 129.1 (x 2), 129.0 , 128.8 , 128.8 , 128.7 , 128.4 , 128.0 , 127.6 , 125.0 , 124.6 , 124.3 , 123.5 , 123.4 , 123.0 , 121.7 , 116.8 , 75.8; **HRMS** (ESI, m/z) calcd for C<sub>34</sub>H<sub>23</sub>BrNO<sub>2</sub> [M + H]<sup>+</sup> 556.0912, found 556.0920.

**(1,3-dimethyl-3'-phenyl-10*H*-spiro[dibenzo[*b,f*][1,4]oxazepine-11,1'-inden]-2'-yl)(phenyl)methanone (4d):**

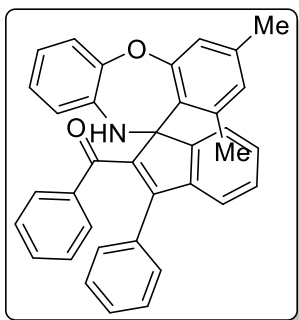

**Yield** 46% (24 h, 46.3 mg); Yellow solid; **eluent composition** petroleum ether/ethyl acetate = 9:1; **mp** 88-90 °C;  $^1\text{H NMR}$  (400 MHz,  $\text{CDCl}_3$ )  $\delta$  7.55 (app d,  $J = 7.6$  Hz, 1H), 7.53-7.49 (comp, 2H), 7.38-7.35 (comp, 3H), 7.26-7.19 (comp, 5H), 7.17-7.15 (m, 1H), 7.11-7.09 (m, 1H), 7.05-7.02 (comp, 3H), 6.86 (app t,  $J = 7.2$  Hz, 1H), 6.61 (app d, 1H), 6.57 (app s, 1H), 6.51 (app d,  $J = 7.4$  Hz, 1H), 4.65 (br s, 1 N-H), 2.26 (s, 3H), 1.71 (s, 3H);  $^{13}\text{C}\{^1\text{H}\}$  **NMR** (100 MHz,  $\text{CDCl}_3$ )  $\delta$  194.1, 157.5, 155.8, 138.2, 138.0, 137.5, 133.1, 133.1, 131.8, 129.2 (x 3), 129.2 (x 3), 128.9, 128.8, 128.3 (x 3), 127.5 (x 3), 126.5, 124.2, 124.1, 124.0, 121.1, 119.9, 76.0, 20.5, 20.2; **HRMS** (ESI,  $m/z$ ) calcd for  $\text{C}_{36}\text{H}_{28}\text{NO}_2$   $[\text{M} + \text{H}]^+$  506.2120, found 506.2120.

**phenyl(3'-phenyl-2,3-dihydro-1H,10H-spiro[benzo[b]indeno[5,6-f][1,4]oxazepine-11,1'-inden]-2'-yl)methanone (4e):**

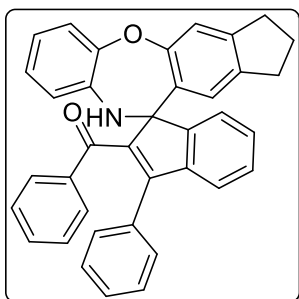

**Yield** 96% (99.3 mg); Yellow solid; **eluent composition** petroleum ether/ethyl acetate = 9:1; **mp** 210-212 °C (crystallization from DCM/hexane bilayer mixture using solvent evaporation method);  $^1\text{H NMR}$  (400 MHz,  $\text{CDCl}_3$ )  $\delta$  7.53-7.48 (comp, 3H), 7.40-7.36 (comp, 3H), 7.28 (app dd,  $J = 7.5, 1.1$  Hz, 1H), 7.25-7.22 (comp, 2H), 7.20-7.18 (comp, 2H), 7.12 (app dd,  $J = 7.8, 1.4$  Hz, 1H), 7.09 (app s, 1H), 7.07-7.03 (comp, 3H), 6.90-6.86 (m, 1H), 6.84-6.80 (m, 1H), 6.62 (app d,  $J = 7.6$  Hz, 1H), 6.59 (app s, 1H), 4.51 (br s, 1 N-H), 2.82 (t,  $J = 7.4$  Hz, 2H), 2.70-2.58 (m, 2H), 2.03-1.92 (m, 2H);  $^{13}\text{C}\{^1\text{H}\}$  **NMR** (100 MHz,  $\text{CDCl}_3$ )  $\delta$  195.1, 155.6, 152.0, 151.8, 147.6, 145.8, 145.4, 141.1, 139.4, 138.3, 137.7, 133.0, 131.9, 129.2, 129.1, 128.6, 128.4, 128.3 (x 2), 127.5, 125.0, 124.6, 124.4, 123.6, 123.3, 123.1, 122.8, 120.8, 117.6, 76.0, 32.6, 32.1, 25.6; **HRMS** (ESI,  $m/z$ ) calcd for  $\text{C}_{37}\text{H}_{28}\text{NO}_2$   $[\text{M} + \text{H}]^+$  518.2120, found 518.2114.

**(2-methyl-3'-phenyl-10H-spiro[dibenzo[b,f][1,4]oxazepine-11,1'-inden]-2'-yl)(phenyl)methanone (4f):**

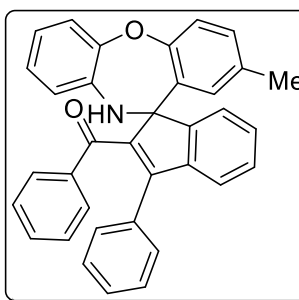

**Yield** 97% (95.1 mg); Yellow solid; **eluent composition** petroleum ether/ethyl acetate = 9:1; **mp** 188-190 °C;  $^1\text{H NMR}$  (400 MHz,  $\text{CDCl}_3$ )  $\delta$  7.53-7.50 (comp, 3H), 7.42-7.37 (comp, 3H), 7.28-7.19 (comp, 5H), 7.17-7.16 (m, 1H), 7.15-7.14 (m, 1H), 7.07-7.03 (comp, 2H), 7.00-6.90 (comp, 3H), 6.83 (app td,  $J = 7.6, 1.4$  Hz, 1H), 6.64 (app d,  $J = 7.2$  Hz, 1H), 6.56 (d,  $J = 1.6$  Hz, 1H), 4.51 (br s, 1 N-H), 2.09 (s, 3H);  $^{13}\text{C}\{^1\text{H}\}$  **NMR** (100 MHz,  $\text{CDCl}_3$ )  $\delta$  195.0, 154.6, 152.4, 152.0, 147.3, 146.7, 141.2, 138.2, 137.7, 133.1, 132.8, 132.1, 129.6, 129.3, 129.2, 128.9, 128.8, 128.6, 128.6, 128.5, 127.7, 127.1

, 124.8 , 124.5 , 124.1 , 123.8 , 123.0 , 121.9 , 120.9 , 76.0, 20.8; **HRMS** (ESI, m/z) calcd for C<sub>35</sub>H<sub>26</sub>NO<sub>2</sub> [M + H]<sup>+</sup> 492.1964, found 492.1973.

**(2-ethyl-3'-phenyl-10*H*-spiro[dibenzo[*b,f*][1,4]oxazepine-11,1'-inden]-2'-yl)(phenyl)methanone (4g):**

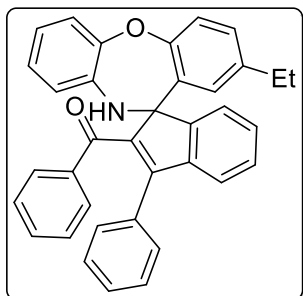

**Yield** 97% (95.1 mg); Yellow solid; **eluent composition** petroleum ether/ethyl acetate = 9:1; **mp** 158-160 °C; **<sup>1</sup>H NMR** (400 MHz, CDCl<sub>3</sub>) δ 7.53-7.50 (comp, 3H), 7.42-7.37 (comp, 3H), 7.28-7.16 (comp, 7H), 7.07-7.03 (comp, 2H), 7.00-6.98 (comp, 2H), 6.96-6.92 (m, 1H), 6.87-6.83 (m, 1H), 6.66 (app d, *J* = 7.6 Hz, 1H), 6.59 (app d, *J* = 2.0 Hz, 1H), 4.62 (br, 1 N-H), 2.39 (q, *J* = 7.5 Hz, 2H), 1.02 (t, *J* = 7.6 Hz, 3H); **<sup>13</sup>C{<sup>1</sup>H} NMR** (100 MHz, CDCl<sub>3</sub>) δ 195.2 , 154.8 , 152.6 , 152.0 , 147.3 , 146.8 , 141.2 , 139.2 , 138.3 , 137.8 , 133.1 , 132.1 , 129.3 , 129.2 , 128.8 , 128.6 , 128.5 , 128.5 , 128.3 , 127.9 , 127.7 , 127.2 , 124.8 , 124.5 , 124.3 , 123.8 , 123.0 , 121.9 , 120.9 , 76.0 , 28.1 , 15.6; **HRMS** (ESI, m/z) calcd for C<sub>36</sub>H<sub>28</sub>NO<sub>2</sub> [M + H]<sup>+</sup> 506.2120, found 506.2022.

**(2-methoxy-3'-phenyl-10*H*-spiro[dibenzo[*b,f*][1,4]oxazepine-11,1'-inden]-2'-yl)(phenyl)methanone (4h):**

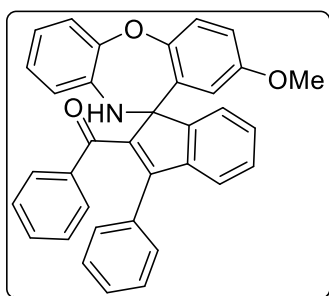

**Yield** 92% (92.9 mg); Yellow solid; **eluent composition** petroleum ether/ethyl acetate = 9:1; **mp** 196-198 °C; **<sup>1</sup>H NMR** (400 MHz, CDCl<sub>3</sub>) δ 7.53-7.48 (comp, 3H), 7.40-7.36 (comp, 3H), 7.28 (app dd, *J* = 7.5, 1.0 Hz, 1H), 7.24-7.18 (comp, 5H), 7.15 (app dd, *J* = 7.9, 1.4 Hz, 1H), 7.07-7.04 (comp, 3H), 6.91 (app td, *J* = 7.7, 1.5 Hz, 1H), 6.83 (app td, *J* = 7.6, 1.4 Hz, 1H), 6.72 (app dd, *J* = 8.9, 3.1 Hz, 1H), 6.64 (app d, *J* = 7.4 Hz, 1H), 6.33 (app d, *J* = 3.2 Hz, 1H), 4.54 (br s, 1 N-H), 3.57 (s, 3H); **<sup>13</sup>C{<sup>1</sup>H} NMR** (100 MHz, CDCl<sub>3</sub>) δ 194.8 , 155.2 , 152.0 , 151.5 , 150.8 , 147.0 , 146.6 , 141.0 , 138.1 , 137.6 , 132.9 , 132.0 , 129.1 , 129.0 , 128.8 , 128.7 , 128.6 , 128.5 , 128.3 , 127.5 , 124.6 , 124.4 , 123.6 , 123.4 , 122.9 , 122.6 , 120.7 , 114.0 , 113.4 , 75.7 , 55.3; **HRMS** (ESI, m/z) calcd for C<sub>35</sub>H<sub>26</sub>NO<sub>3</sub> [M + H]<sup>+</sup> 508.1913, found 508.1918.

**(2-fluoro-3'-phenyl-10*H*-spiro[dibenzo[*b,f*][1,4]oxazepine-11,1'-inden]-2'-yl)(phenyl)methanone (4i):**

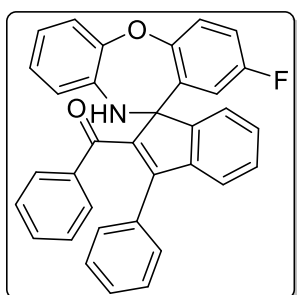

**Yield** 98% (96.9 mg); Yellow solid; **eluent composition** petroleum ether/ethyl acetate = 9:1; **mp** 88-90 °C; **<sup>1</sup>H NMR** (400 MHz, CDCl<sub>3</sub>) δ 7.53-7.51 (comp, 2H), 7.49-7.48 (m, 1H), 7.41 (app dd, *J* = 7.5, 1.1 Hz, 1H), 7.39-7.38 (m, 1H), 7.37-7.36 (m, 1H), 7.30-7.26 (m, 1H), 7.24-7.19 (comp, 5H), 7.17 (app dd, *J* = 7.9, 1.6 Hz, 1H), 7.08-7.04 (comp, 2H), 7.00 (app d, *J* = 7.6 Hz, 1H), 6.94 (app td, *J* = 7.7, 1.5



Hz, 1H), 6.89-6.85 (m, 1H), 6.84-6.80 (m, 1H), 6.66-6.64 (m, 1H), 6.45 (app dd,  $J = 9.9, 3.1$  Hz, 1H), 4.44 (br s, 1 N-H);  $^{13}\text{C}\{^1\text{H}\}$  NMR (100 MHz,  $\text{CDCl}_3$ )  $\delta$  194.6, 159.6, 157.2, 152.6 (d,  $J = 2.1$  Hz), 152.1, 151.3, 147.1, 146.7, 140.9, 137.9, 137.4, 132.6, 132.1, 129.4 (d,  $J = 6.9$  Hz), 129.1, 129.0, 128.8, 128.7, 128.4, 127.6, 124.6, 124.5, 123.9, 123.3, 123.2, 123.1, 120.8, 115.4 (d,  $J = 23.2$  Hz), 114.7 (d,  $J = 24.5$  Hz), 75.6;  $^{19}\text{F}$  NMR (376 MHz,  $\text{CDCl}_3$ )  $\delta$  -119.76; HRMS (ESI,  $m/z$ ) calcd for  $\text{C}_{34}\text{H}_{23}\text{FNO}_2$  [ $\text{M} + \text{H}$ ] $^+$  496.1713, found 496.1735.

**(2,8-dichloro-3'-phenyl-10*H*-spiro[dibenzo[*b,f*][1,4]oxazepine-11,1'-inden]-2'-yl)(phenyl)methanone (4j):**

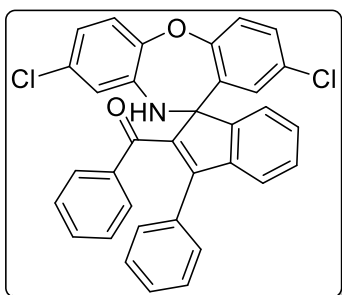

**Yield** 59% (64.4 mg); Yellow solid; **eluent composition** petroleum ether/ethyl acetate = 9:1; **mp** 202-204 °C;  $^1\text{H}$  NMR (400 MHz,  $\text{CDCl}_3$ )  $\delta$  7.52 (app d,  $J = 7.6$  Hz, 1H), 7.49-7.42 (comp, 3H), 7.37-7.33 (comp, 3H), 7.25-7.20 (comp, 4H), 7.18-7.12 (comp, 3H), 7.11-7.09 (m, 1H), 7.07-7.05 (m, 1H), 7.04 (app d,  $J = 7.2$  Hz, 1H), 6.83 (app dd,  $J = 8.5, 2.4$  Hz, 1H), 6.69 (app d,  $J = 2.0$  Hz, 1H), 6.61 (app d,  $J = 2.4$  Hz, 1H), 4.47 (br s, 1 N-H);  $^{13}\text{C}\{^1\text{H}\}$  NMR (100 MHz,  $\text{CDCl}_3$ )  $\delta$  194.5, 154.8, 150.6, 149.1, 146.7, 146.5, 140.8, 138.8, 137.0, 132.5, 132.4, 129.3, 129.3, 129.2, 129.0, 128.9 (x 4), 128.9, 128.6, 128.4, 128.1, 127.7, 124.4, 123.2, 123.0, 122.7, 121.8, 75.4; HRMS (ESI,  $m/z$ ) calcd for  $\text{C}_{34}\text{H}_{22}\text{Cl}_2\text{NO}_2$  [ $\text{M} + \text{H}$ ] $^+$  546.1028, found 546.1023.

**(7'-methoxy-3'-phenyl-10*H*-spiro[dibenzo[*b,f*][1,4]oxazepine-11,1'-inden]-2'-yl)(phenyl)methanone (4k):**

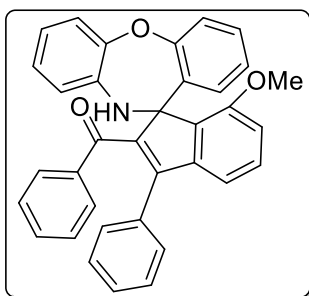

**Yield** 99% (100.8 mg); Yellow solid; **eluent composition** petroleum ether/ethyl acetate = 9:1; **mp** 234-236 °C;  $^1\text{H}$  NMR (400 MHz,  $\text{CDCl}_3$ )  $\delta$  7.52-7.49 (m, 2H), 7.40 (app d,  $J = 8.0$  Hz, 1H), 7.37-7.34 (comp, 2H), 7.22-7.16 (comp, 6H), 7.10-7.02 (comp, 4H), 6.90-6.85 (comp, 2H), 6.81-6.76 (comp, 2H), 6.74-6.70 (m, 1H), 6.63-6.61 (m, 1H), 4.60 (br s, 1 N-H), 3.47 (s, 3H);  $^{13}\text{C}\{^1\text{H}\}$  NMR (100 MHz,  $\text{CDCl}_3$ )  $\delta$  194.7, 156.8, 155.4, 150.7, 148.6, 143.2, 138.9, 137.4, 136.8, 133.0, 132.0, 130.6, 129.2, 128.9, 128.6, 128.4, 128.2 (x 2), 127.4 (x 2), 127.1, 124.2, 123.5, 122.4, 122.0, 121.6, 120.6, 115.2, 112.0, 76.0, 55.5; HRMS (ESI,  $m/z$ ) calcd for  $\text{C}_{35}\text{H}_{26}\text{NO}_3$  [ $\text{M} + \text{H}$ ] $^+$  508.1913, found 508.1904.

**(7'-methyl-3'-phenyl-10*H*-spiro[dibenzo[*b,f*][1,4]oxazepine-11,1'-inden]-2'-yl)(phenyl)methanone (4l):**

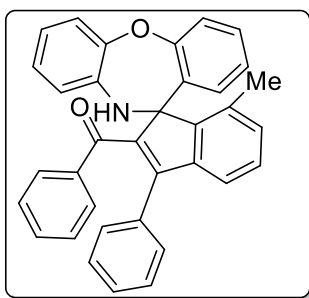

**Yield** 98% (96.3 mg); Yellow solid; **eluent composition** petroleum ether/ethyl acetate = 9:1; **mp** 184-186 °C; **<sup>1</sup>H NMR** (400 MHz, CDCl<sub>3</sub>) δ 7.39-7.37 (comp, 2H), 7.33-7.29 (comp, 4H), 7.22-7.14 (comp, 7H), 7.06-7.04 (m, 1H), 7.01-6.97 (comp, 2H), 6.88-6.84 (m, 1H), 6.74-6.71 (comp, 2H), 6.52-6.48 (m, 1H), 6.44-6.42 (m, 1H), 4.04 (br s, 1 N-H), 2.27 (s, 3H); **<sup>13</sup>C{<sup>1</sup>H} NMR** (100 MHz, CDCl<sub>3</sub>) δ 194.4 , 156.0 , 150.1 , 149.10, 148.8 , 145.1 , 141.4 , 138.0 , 137.1 , 135.9 , 133.1 , 131.8 , 131.1 , 129.1 , 129.0 , 128.8 , 128.6 , 128.4 , 128.3 , 127.9 , 127.3 , 125.8 , 124.1 , 123.3 , 122.8 , 121.7 , 121.6, 120.7 , 120.0 , 76.8 , 18.0; **HRMS** (ESI, m/z) calcd for C<sub>35</sub>H<sub>26</sub>NO<sub>2</sub> [M + H]<sup>+</sup> 492.1964, found 492.1963.

**(7'-nitro-3'-phenyl-10*H*-spiro[dibenzo[*b,f*][1,4]oxazepine-11,1'-inden]-2'-yl)(phenyl)methanone (4m):**

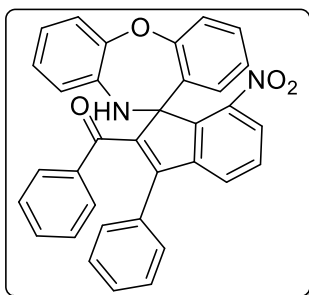

**Yield** 90% (94.1 mg); Yellow solid; **eluent composition** petroleum ether/ethyl acetate = 9:1; **mp** 186-188 °C; **<sup>1</sup>H NMR** (400 MHz, CDCl<sub>3</sub>) δ 7.98 (app d, *J* = 8.0 Hz, 1H), 7.74 (app d, *J* = 7.6 Hz, 1H), 7.60 (m, 1H), 7.41-7.39 (comp, 2H), 7.33-7.29 (comp, 2H), 7.23-7.18 (comp, 6H), 7.09-7.07 (m, 1H), 7.04-7.00 (comp, 2H), 6.90-6.86 (m, 1H), 6.84-6.80 (m, 1H), 6.69- 6.67 (m, 1H), 6.59-6.52 (comp, 2H), 4.80 (br s, 1 N-H); **<sup>13</sup>C{<sup>1</sup>H} NMR** (100 MHz, CDCl<sub>3</sub>) δ 193.3 , 156.2 , 152.0 , 150.3 , 145.7 , 145.2 , 144.0 , 141.9 , 137.1 , 136.6 , 132.4 , 131.9 , 130.6 , 129.2 , 129.1 , 129.0 , 128.7 (x 2) , 128.6 , 127.5 , 127.2 , 126.6 , 125.9 , 124.3 , 123.9 , 123.9 , 123.6 , 122.2 , 120.8 , 77.7; **HRMS** (ESI, m/z) calcd for C<sub>34</sub>H<sub>23</sub>N<sub>2</sub>O<sub>4</sub> [M + H]<sup>+</sup> 523.1658, found 523.1643.

**(6'-methoxy-3'-phenyl-10*H*-spiro[dibenzo[*b,f*][1,4]oxazepine-11,1'-inden]-2'-yl)(phenyl)methanone (4n) and (4'-methoxy-3'-phenyl-10*H*-spiro[dibenzo[*b,f*][1,4]oxazepine-11,1'-inden]-2'-yl)(phenyl)methanone (4n')**:

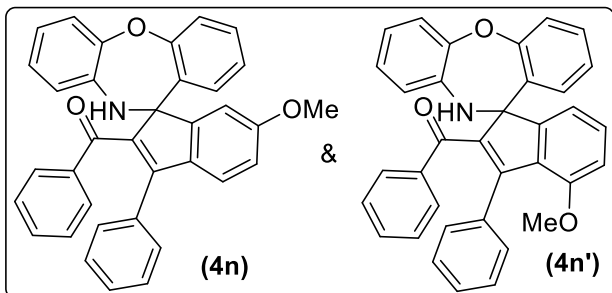

**Combined Yield** 99% (109.3 mg, regioisomeric ratio of **4n** : **4n'** = 1.2:1); Yellow solid; **eluent composition** petroleum ether/ethyl acetate = 9:1; **mp** 76-78 °C; **Combined <sup>1</sup>H NMR** (400 MHz, CDCl<sub>3</sub>) δ 7.46-7.43 (comp, 4H), 7.41 (app d, *J* = 8.4 Hz, 1H), 7.37-7.34 (comp, 3H), 7.30 (app dd, *J* = 8.2, 1.2 Hz, 1H), 7.24-7.22 (comp, 3H), 7.20-7.19 (comp, 3H), 7.18-7.16 (comp, 4H), 7.16-7.14 (comp, 2H), 7.11-7.08 (comp, 3H), 7.04-7.02 (comp, 3H), 7.01-6.97 (comp, 2H), 6.92-6.89 (comp, 3H), 6.88-6.86 (comp, 3H), 6.85-6.84 (m, 1H), 6.82-6.78

(comp, 2H), 6.74 (app d,  $J = 6.9$  Hz, 1H), 6.66-6.62 (comp, 2H), 6.44 (app d,  $J = 2.1$  Hz, 1H), 4.60 (br s, 1 N-H), 4.36 (br s, 1 N-H), 3.66 (s, 3H), 3.64 (s, 3H);  $^{13}\text{C}\{^1\text{H}\}$  NMR (100 MHz,  $\text{CDCl}_3$ )  $\delta$  195.0, 194.3, 160.6, 156.2, 156.0, 155.7, 154.1, 154.1, 154.1, 153.1, 151.8, 148.6, 148.6, 147.6, 147.5, 146.3, 146.3, 145.1, 145.0, 138.0, 137.9, 137.6, 134.5, 133.4, 133.1, 131.7, 131.6, 130.2, 129.6, 129.2, 129.0 (x 3), 128.9, 128.8, 128.7, 128.6, 128.5, 128.2, 127.9, 127.7, 127.7, 127.4, 127.4, 126.9, 125.0, 124.4, 124.1, 123.6, 123.4, 122.0, 121.9, 120.9, 120.8, 117.2, 114.6, 112.0, 110.3, 75.6, 75.4, 55.4, 55.3; HRMS (ESI,  $m/z$ ) calcd for  $\text{C}_{35}\text{H}_{26}\text{NO}_3$  [ $\text{M} + \text{H}$ ] $^+$  508.1913, found 508.1915.

**(6'-bromo-3'-phenyl-10*H*-spiro[dibenzo[*b,f*][1,4]oxazepine-11,1'-inden]-2'-yl)(phenyl)methanone (4o) and (4'-bromo-3'-phenyl-10*H*-spiro[dibenzo[*b,f*][1,4]oxazepine-11,1'-inden]-2'-yl)(phenyl)methanone (4o')**

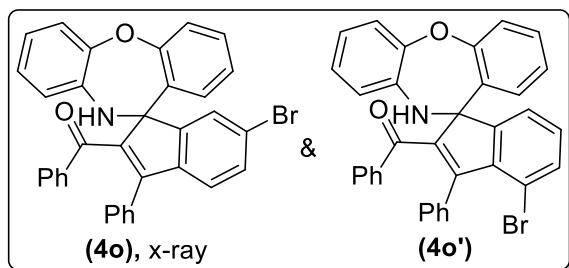

**Combined Yield** 93% (103.6 mg, regioisomeric ratio of **4o** : **4o'** = 5:1); **Yellow solid**; **eluent composition** petroleum ether/ethyl acetate = 9:1; **mp** 158-160 °C (crystallization from DCM/hexane bilayer mixture using solvent evaporation method);  $^1\text{H}$  NMR

**of 4o, after x-ray** (400 MHz,  $\text{CDCl}_3$ )  $\delta$  7.51 (app dd,  $J = 8.1, 1.8$  Hz, 1H), 7.47-7.44 (comp, 2H), 7.37-7.33 (comp, 3H), 7.28-7.24 (m, 1H), 7.23-7.17 (comp, 6H), 7.09-7.02 (comp, 3H), 6.97 (td,  $J = 7.7, 1.5$  Hz, 1H), 6.91-6.88 (m, 1H), 6.87-6.84 (m, 1H), 6.78 (app dd,  $J = 7.9, 1.6$  Hz, 1H), 6.67 (app d,  $J = 7.5$  Hz, 1H), 4.52 (br s, 1 N-H);  $^{13}\text{C}\{^1\text{H}\}$  NMR (100 MHz,  $\text{CDCl}_3$ )  $\delta$  194.4, 156.4, 153.5, 152.4, 147.1, 146.1, 140.0, 137.6, 137.3, 132.4, 132.2, 131.7, 129.1, 129.0 (x 4), 128.6, 128.4, 128.0, 127.6, 126.6, 124.6, 124.2, 124.2, 123.6, 122.7, 122.2, 121.0, 75.8; HRMS (ESI,  $m/z$ ) calcd for  $\text{C}_{34}\text{H}_{23}\text{BrNO}_2$  [ $\text{M} + \text{H}$ ] $^+$  556.0912, found 556.0933.

**Figure S5.** X-ray crystal structure of **4o** (ellipsoid contour at 50% probability level)

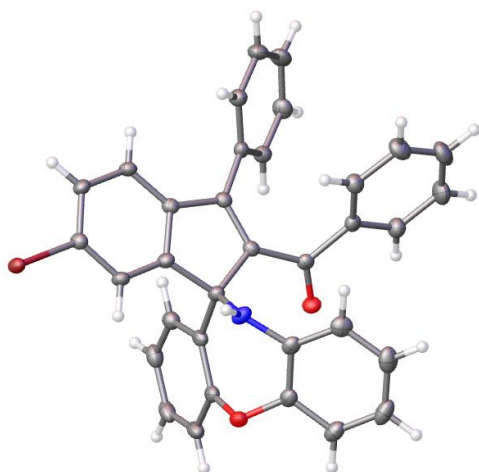

### Crystal data and structure refinement for 4o, CCDC No. 2226415

|                                    |                                                               |
|------------------------------------|---------------------------------------------------------------|
| Empirical formula                  | C <sub>34</sub> H <sub>22</sub> BrNO <sub>2</sub>             |
| Formula weight                     | 556.43                                                        |
| Temperature/K                      | 100.0                                                         |
| Crystal system                     | monoclinic                                                    |
| Space group                        | P2 <sub>1</sub> /c                                            |
| a/Å                                | 11.7008(2)                                                    |
| b/Å                                | 13.1668(3)                                                    |
| c/Å                                | 17.7959(3)                                                    |
| α/°                                | 90                                                            |
| β/°                                | 106.2500(10)                                                  |
| γ/°                                | 90                                                            |
| Volume/Å <sup>3</sup>              | 2632.14(9)                                                    |
| Z                                  | 4                                                             |
| ρ <sub>calc</sub> /cm <sup>3</sup> | 1.404                                                         |
| μ/mm <sup>-1</sup>                 | 2.379                                                         |
| F(000)                             | 1136.0                                                        |
| Crystal size/mm <sup>3</sup>       | 0.35 × 0.25 × 0.2                                             |
| Radiation                          | Cu Kα (λ = 1.54178)                                           |
| 2θ range for data collection/°     | 7.87 to 130.102                                               |
| Index ranges                       | -13 ≤ h ≤ 13, -15 ≤ k ≤ 15, -20 ≤ l ≤ 20                      |
| Reflections collected              | 45439                                                         |
| Independent reflections            | 4432 [R <sub>int</sub> = 0.0442, R <sub>sigma</sub> = 0.0271] |
| Data/restraints/parameters         | 4432/0/343                                                    |
| Goodness-of-fit on F <sup>2</sup>  | 1.069                                                         |
| Final R indexes [I ≥ 2σ (I)]       | R <sub>1</sub> = 0.0325, wR <sub>2</sub> = 0.0850             |
| Final R indexes [all data]         | R <sub>1</sub> = 0.0328, wR <sub>2</sub> = 0.0853             |

Largest diff. peak/hole / e Å<sup>-3</sup> 0.61/-0.76

**(6'-nitro-3'-phenyl-10*H*-spiro[dibenzo[*b,f*][1,4]oxazepine-11,1'-inden]-2'-yl)(phenyl)methanone (4p):**

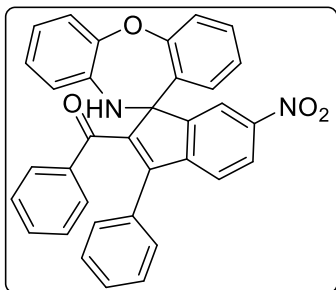

**Yield** 77% (80.5 mg); Yellow solid; **eluent composition** petroleum ether/ethyl acetate = 9:1; **mp** 226-228 °C; **<sup>1</sup>H NMR** (400 MHz, CDCl<sub>3</sub>) δ 8.28 (app dd, *J* = 8.4, 2.1 Hz, 1H), 7.76 (app d, *J* = 2.0 Hz, 1H), 7.63 (app d, *J* = 8.4 Hz, 1H), 7.51-7.48 (comp, 2H), 7.39-7.37 (comp, 2H), 7.29-7.24 (comp, 5H), 7.23-7.18 (comp, 2H), 7.10-7.06 (comp, 2H), 7.02-6.98 (m, 1H), 6.91-6.85 (comp, 2H), 6.77 (app dd, *J* = 7.9, 1.5 Hz, 1H), 6.65 (app d, *J* = 7.6 Hz, 1H), 4.60 (br s, 1 N-H); **<sup>13</sup>C{<sup>1</sup>H} NMR** (100 MHz, CDCl<sub>3</sub>) δ 194.2, 156.7, 155.9, 152.7, 152.3, 151.2, 147.6, 147.5, 144.3, 137.2, 136.7, 132.7, 131.7, 129.5, 129.4, 129.1, 128.8, 128.7, 128.3, 127.8, 125.4, 125.0, 124.7, 124.2, 123.8, 123.0, 122.5, 121.2, 119.8, 75.8; **HRMS** (ESI, *m/z*) calcd for C<sub>34</sub>H<sub>23</sub>N<sub>2</sub>O<sub>4</sub> [M + H]<sup>+</sup> 523.1658, found 523.1644.

**(5'-methoxy-3'-phenyl-10*H*-spiro[dibenzo[*b,f*][1,4]oxazepine-11,1'-inden]-2'-yl)(phenyl)methanone (4q):**

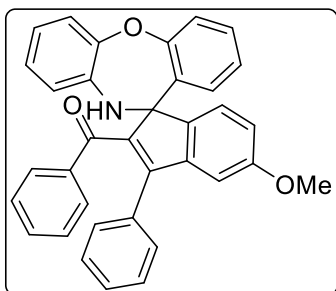

**Yield** 92% (93.2 mg); Yellow solid; **eluent composition** petroleum ether/ethyl acetate = 9:1; **mp** 194-196 °C; **<sup>1</sup>H NMR** (400 MHz, CDCl<sub>3</sub>) δ 7.49-7.47 (comp, 2H), 7.38-7.36 (comp, 2H), 7.25-7.22 (comp, 2H), 7.21-7.18 (comp, 3H), 7.17-7.14 (comp, 2H), 7.06-7.02 (comp, 3H), 6.93 (app d, *J* = 8.2 Hz, 1H), 6.91-6.89 (m, 1H), 6.88-6.85 (m, 1H), 6.82-6.78 (comp, 3H), 6.65 (app d, *J* = 7.5 Hz, 1H), 4.45 (br s, 1 N-H), 3.82 (s, 3H); **<sup>13</sup>C{<sup>1</sup>H} NMR** (100 MHz, CDCl<sub>3</sub>) δ 194.7, 160.3, 156.4, 151.7, 148.5, 146.1, 144.0, 142.6, 138.1, 137.4, 132.8, 132.0, 129.1, 128.9, 128.8, 128.7, 128.6, 128.3, 127.8, 127.5, 125.3, 124.4, 123.6, 123.5, 123.4, 121.9, 120.8, 113.3, 108.9, 75.4, 55.6; **HRMS** (ESI, *m/z*) calcd for C<sub>35</sub>H<sub>26</sub>NO<sub>3</sub> [M + H]<sup>+</sup> 508.1913, found 508.1911.

**(5'-nitro-3'-phenyl-10*H*-spiro[dibenzo[*b,f*][1,4]oxazepine-11,1'-inden]-2'-yl)(phenyl)methanone (4r):**

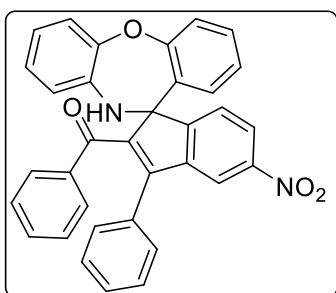

**Yield** 95% (99.3 mg); Yellow solid; **eluent composition** petroleum ether/ethyl acetate = 9:1; **mp** 246-248 °C; **<sup>1</sup>H NMR** (400 MHz, CDCl<sub>3</sub>) δ 8.32 (app d, *J* = 2.0 Hz, 1H), 8.11 (app dd, *J* = 8.3, 2.1 Hz, 1H), 7.53-7.48 (comp, 2H), 7.43-7.38 (comp, 2H), 7.31-7.27 (comp, 4H), 7.25-7.18 (comp, 3H), 7.11-7.06 (comp, 2H), 7.01 (app d, *J* = 8.3 Hz, 2H), 6.92-6.89 (m, 1H), 6.89-6.86 (m, 1H), 6.76

(app dd,  $J = 7.9, 1.6$  Hz, 1H), 6.68 (app d,  $J = 7.7$  Hz, 1H), 4.71 (br s, 1 N-H);  $^{13}\text{C}\{^1\text{H}\}$  NMR (100 MHz,  $\text{CDCl}_3$ )  $\delta$  194.1, 157.8, 156.3, 152.8, 148.7, 144.9, 142.8, 137.3, 136.9, 132.6, 131.6, 129.5, 129.3, 129.1, 128.8 (x 3), 128.6, 127.8, 125.4, 125.0, 124.9, 124.7, 124.5, 123.9, 123.8, 122.5, 121.1, 117.8, 75.7; HRMS (ESI,  $m/z$ ) calcd for  $\text{C}_{34}\text{H}_{23}\text{N}_2\text{O}_4$   $[\text{M} + \text{H}]^+$  523.1658, found 523.1649.

**phenyl(3'-phenyl-10*H*-spiro[dibenzo[*b,f*][1,4]oxazepine-11,1'-inden]-2'-yl-4',5',6',7'-*d*<sub>4</sub>)methanone (4s):**

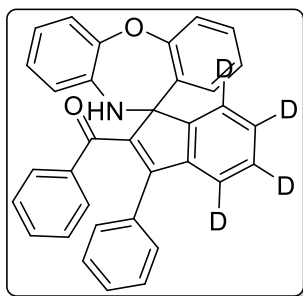

**Yield** 99% (95.7 mg); Yellow solid; **eluent composition** petroleum ether/ethyl acetate = 9:1; **mp** 150-152 °C;  $^1\text{H}$  NMR (400 MHz,  $\text{CDCl}_3$ )  $\delta$  7.49-7.47 (comp, 2H), 7.40-7.37 (comp, 2H), 7.27-7.23 (m, 1H), 7.22-7.15 (comp, 6H), 7.06-7.02 (comp, 2H), 6.96-6.91 (m, 1H), 6.88-6.80 (comp, 2H), 6.78 (app dd,  $J = 7.9, 1.6$  Hz, 1H), 6.66 (app d,  $J = 7.4$  Hz, 1H);  $^{13}\text{C}\{^1\text{H}\}$  NMR (100 MHz,  $\text{CDCl}_3$ )  $\delta$  194.8, 156.4, 152.1, 151.7, 147.2-147.1 (m), 147.0-146.8 (m), 141.0, 138.1-137.8 (m), 137.5, 132.9, 132.0, 129.1 (x 2), 129.0 (x 2), 128.8, 128.7, 128.7, 128.3 (x 2), 127.5 (x 2), 127.4, 124.5, 123.9, 123.8, 123.5, 122.0, 120.9, 75.9; HRMS (ESI,  $m/z$ ) calcd for  $\text{C}_{34}\text{H}_{20}\text{D}_4\text{NO}_2$   $[\text{M} + \text{H}]^+$  482.2058, found 482.2043.

**phenyl(3'-phenyl-10*H*-spiro[dibenzo[*b,f*][1,4]thiazepine-11,1'-inden]-2'-yl)methanone (4t):**

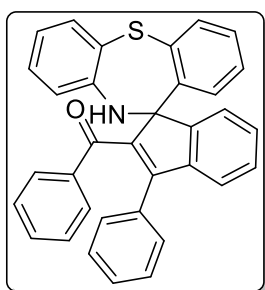

**Yield** 75% (74.0 mg); White solid; **eluent composition** petroleum ether/ethyl acetate = 9:1; **mp** 158-160 °C;  $^1\text{H}$  NMR (400 MHz,  $\text{CDCl}_3$ )  $\delta$  7.65-7.63 (m, 1H), 7.55 (app d,  $J = 7.6$  Hz, 1H), 7.47 (app dd,  $J = 7.8, 1.3$  Hz, 1H), 7.42-7.36 (comp, 5H), 7.21-7.14 (comp, 5H), 7.10-7.10 (comp, 2H), 7.02-6.98 (comp, 3H), 6.94-6.90 (m, 1H), 6.72 (app dd,  $J = 7.9, 1.4$  Hz, 2H), 6.55 (app d,  $J = 7.3$  Hz, 1H), 5.66 (br s, 1 N-H);  $^{13}\text{C}\{^1\text{H}\}$  NMR (100 MHz,  $\text{CDCl}_3$ )  $\delta$  195.2, 152.4, 148.4, 147.4, 147.0, 141.6, 137.9, 137.7, 136.1, 133.8, 132.9, 132.3, 131.7, 131.2, 129.8, 129.4, 129.0, 128.8, 128.7, 128.6, 128.2, 128.2 (x 2), 127.5, 127.0, 126.9, 125.6, 125.3, 123.3, 76.1; HRMS (ESI,  $m/z$ ) calcd for  $\text{C}_{34}\text{H}_{24}\text{NOS}$   $[\text{M} + \text{H}]^+$  494.1579, found 494.1582.

**(5,5-dioxido-3'-phenyl-10*H*-spiro[dibenzo[*b,f*][1,4]thiazepine-11,1'-inden]-2'-yl)(phenyl)methanone (4u):**

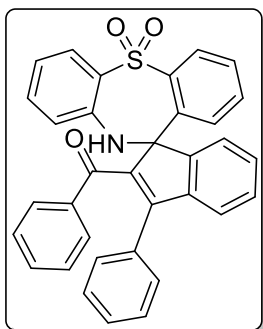

**Yield** 58% (60.6 mg); Yellow solid; **eluent composition** petroleum ether/ethyl acetate = 9:1; **mp** 254-256 °C (crystallization from EtOH/hexane mixture using solvent evaporation method); **<sup>1</sup>H NMR** (400 MHz, CDCl<sub>3</sub>) δ 8.37 (app dd, *J* = 7.9, 1.5 Hz, 1H), 8.06 (app dd, *J* = 7.7, 1.5 Hz, 1H), 7.54 (app d, *J* = 7.6 Hz, 1H), 7.47-7.45 (comp, 2H), 7.42-7.40 (m, 1H), 7.38-7.32 (comp, 4H), 7.30-7.26 (m, 1H), 7.24-7.12 (comp, 7H), 7.03 (comp, 2H), 6.91 (app dd, *J* = 7.9, 1.1 Hz, 1H), 6.73 (app d, *J* = 7.6 Hz, 1H), 5.35 (br s, 1 N-H); **<sup>13</sup>C{<sup>1</sup>H} NMR** (100 MHz, CDCl<sub>3</sub>) δ 193.4, 151.5, 149.7, 146.2, 143.4, 140.5, 139.6, 139.2, 139.0, 137.4, 134.0, 133.1, 132.6, 131.9, 129.3 (x 2), 129.2 (x 2), 129.1, 129.0, 129.0, 128.3, 127.6, 127.4, 127.2, 126.7, 125.4, 125.3, 123.5, 77.8; **HRMS** (ESI, *m/z*) calcd for C<sub>34</sub>H<sub>24</sub>NO<sub>3</sub>S [M + H]<sup>+</sup> 526.1477, found 526.1479.

**phenyl(3'-phenyl-5,11-dihydrospiro[dibenzo[*b,e*]azepine-6,1'-inden]-2'-yl)methanone (4v):**

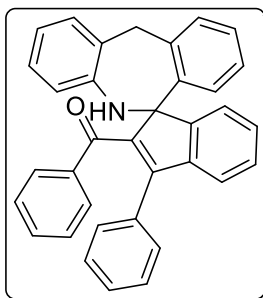

**Yield** 96% (90.9 mg); Yellow solid; **eluent composition** petroleum ether/ethyl acetate = 9:1; **mp** 174-176 °C; **<sup>1</sup>H NMR** (400 MHz, CDCl<sub>3</sub>) δ 7.54-7.51 (comp, 3H), 7.43-7.40 (comp, 2H), 7.35 (app td, *J* = 7.5, 1.0 Hz, 1H), 7.28-7.25 (m, 1H), 7.24-7.19 (comp, 5H), 7.16 (app dd, *J* = 7.5, 0.9 Hz, 1H), 7.09-7.00 (comp, 5H), 6.96-6.92 (m, 1H), 6.68-6.64 (comp, 2H), 6.61 (app d, *J* = 7.5 Hz, 1H), 4.87 (d, *J* = 13.6 Hz, 1H), 3.89 (br s, 1 N-H), 3.63 (d, *J* = 13.7 Hz, 1H); **<sup>13</sup>C{<sup>1</sup>H} NMR** (100 MHz, CDCl<sub>3</sub>) δ 195.2, 154.0, 148.1, 146.9, 143.8, 140.6, 138.9, 138.0, 135.7, 133.1, 131.9, 129.9, 129.1, 129.0 (x 2), 128.8, 128.7, 128.3, 127.8, 127.7 (x 2), 127.6, 127.0, 126.7, 126.3, 124.5, 124.2, 123.7, 122.8, 77.1, 39.9; **HRMS** (ESI, *m/z*) calcd for C<sub>35</sub>H<sub>26</sub>NO [M + H]<sup>+</sup> 476.2014, found 476.2015.

**Figure S6.** X-ray crystal structure of **4v** (ellipsoid contour at 50% probability level)

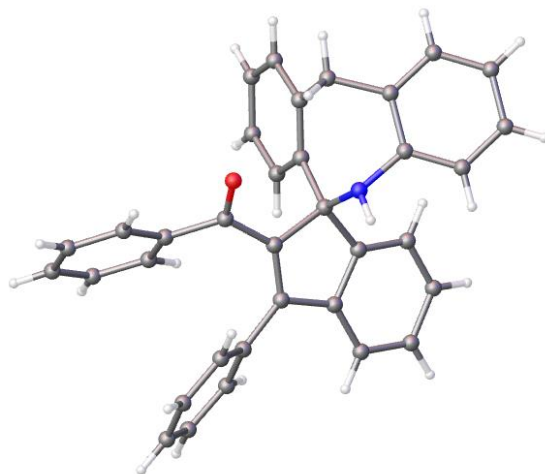

## Crystal data and structure refinement for 4v, CCDC No. 2226414

|                                             |                                                               |
|---------------------------------------------|---------------------------------------------------------------|
| Empirical formula                           | C <sub>35</sub> H <sub>25</sub> NO                            |
| Formula weight                              | 475.56                                                        |
| Temperature/K                               | 100.0                                                         |
| Crystal system                              | orthorhombic                                                  |
| Space group                                 | P2 <sub>1</sub> 2 <sub>1</sub> 2 <sub>1</sub>                 |
| a/Å                                         | 9.8267(12)                                                    |
| b/Å                                         | 9.9692(11)                                                    |
| c/Å                                         | 24.995(3)                                                     |
| α/°                                         | 90                                                            |
| β/°                                         | 90                                                            |
| γ/°                                         | 90                                                            |
| Volume/Å <sup>3</sup>                       | 2448.6(5)                                                     |
| Z                                           | 4                                                             |
| ρ <sub>calc</sub> /cm <sup>3</sup>          | 1.290                                                         |
| μ/mm <sup>-1</sup>                          | 0.595                                                         |
| F(000)                                      | 1000.0                                                        |
| Crystal size/mm <sup>3</sup>                | 0.404 × 0.25 × 0.18                                           |
| Radiation                                   | Cu Kα (λ = 1.54178)                                           |
| 2θ range for data collection/°              | 9.55 to 127.28                                                |
| Index ranges                                | -11 ≤ h ≤ 11, -11 ≤ k ≤ 11, -29 ≤ l ≤ 28                      |
| Reflections collected                       | 45710                                                         |
| Independent reflections                     | 3942 [R <sub>int</sub> = 0.0576, R <sub>sigma</sub> = 0.0339] |
| Data/restraints/parameters                  | 3942/0/335                                                    |
| Goodness-of-fit on F <sup>2</sup>           | 1.142                                                         |
| Final R indexes [I >= 2σ (I)]               | R <sub>1</sub> = 0.0377, wR <sub>2</sub> = 0.0928             |
| Final R indexes [all data]                  | R <sub>1</sub> = 0.0378, wR <sub>2</sub> = 0.0929             |
| Largest diff. peak/hole / e Å <sup>-3</sup> | 0.22/-0.25                                                    |
| Flack parameter                             | 0.01(8)                                                       |



# <sup>1</sup>H and <sup>13</sup>C NMR of Spirocyclized Products:

## <sup>1</sup>H NMR of 3a (400 MHz, CDCl<sub>3</sub>):

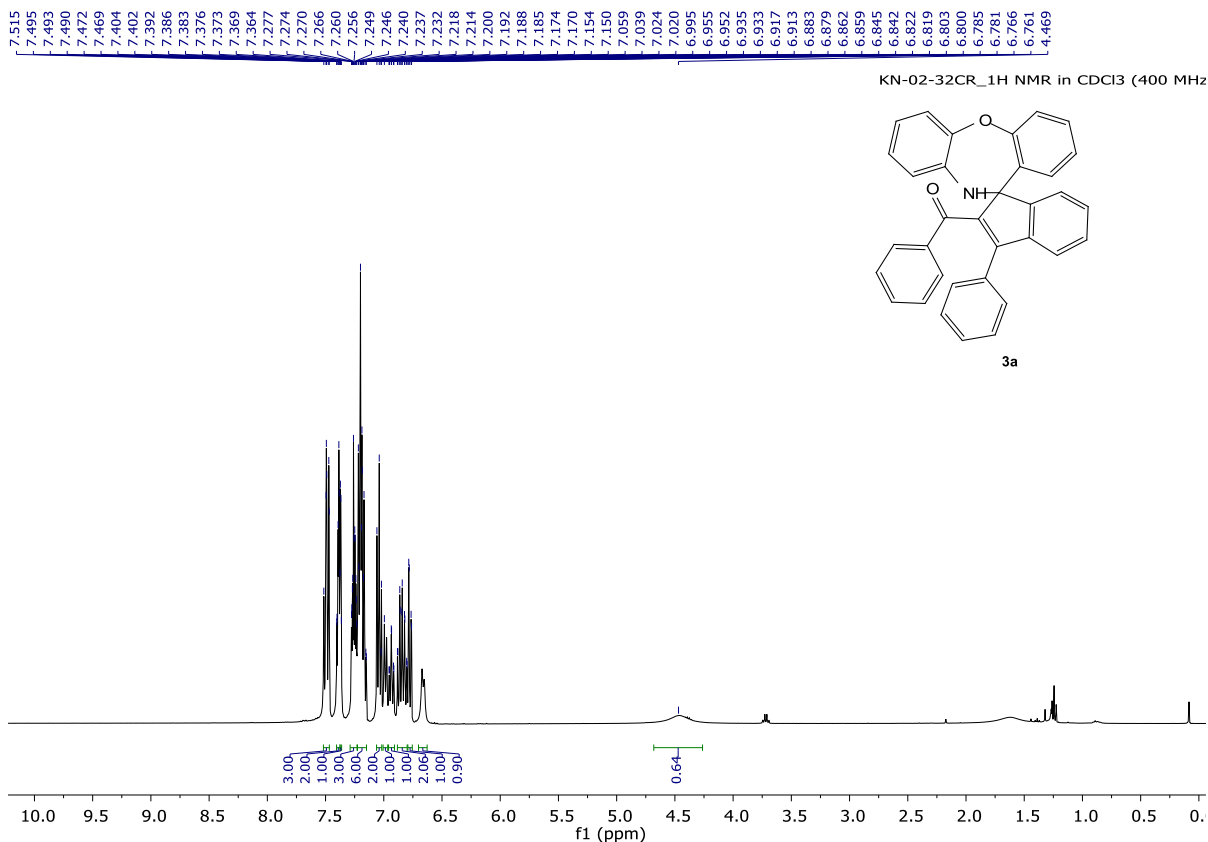

## <sup>13</sup>C NMR of 3a (100 MHz, CDCl<sub>3</sub>):

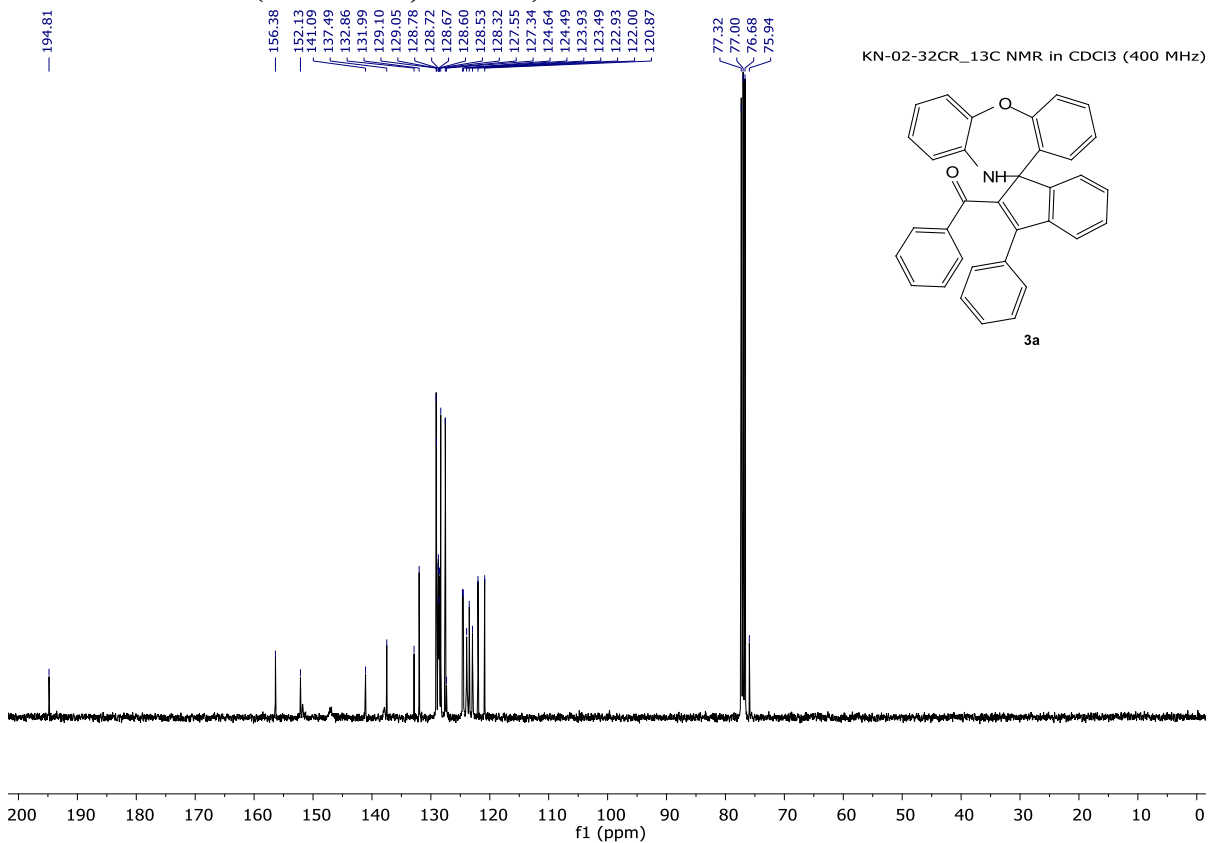

### <sup>1</sup>H NMR of 3b (400 MHz, CDCl<sub>3</sub>):

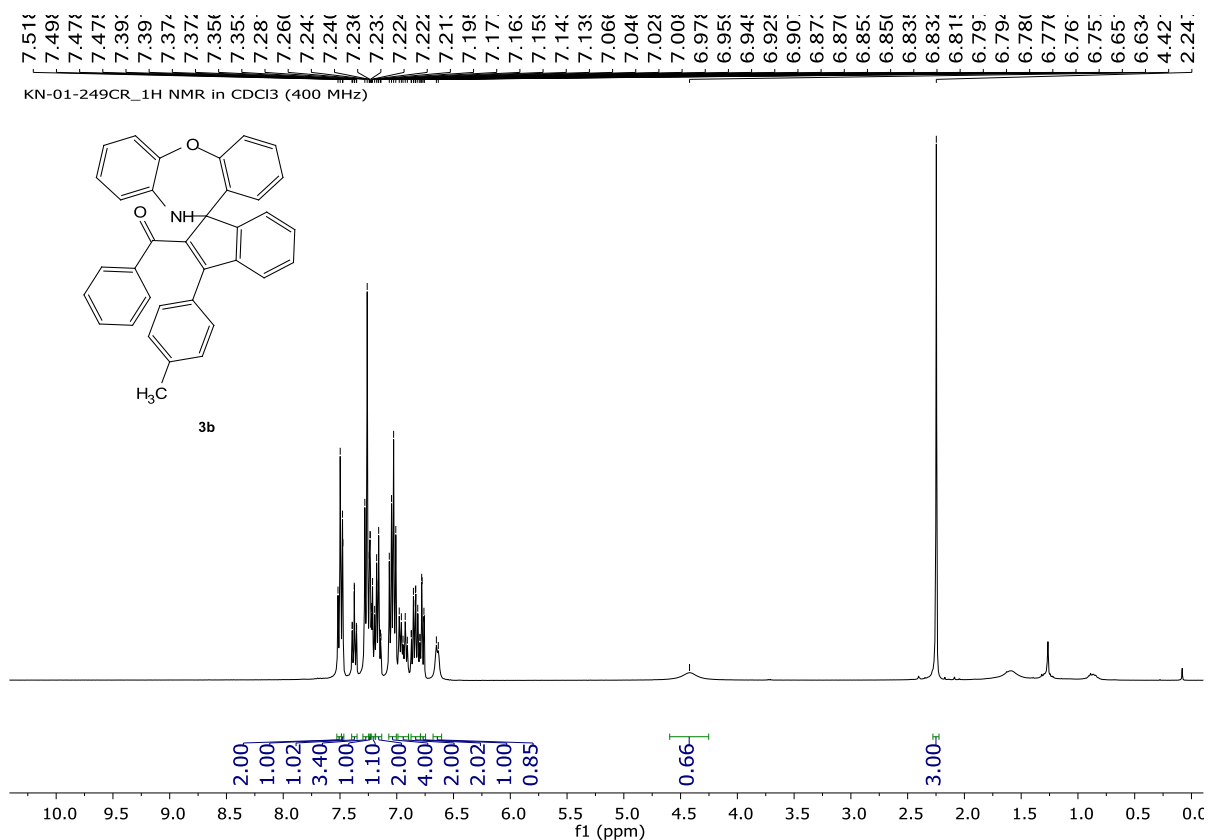

### <sup>13</sup>C NMR of 3b (100 MHz, CDCl<sub>3</sub>):

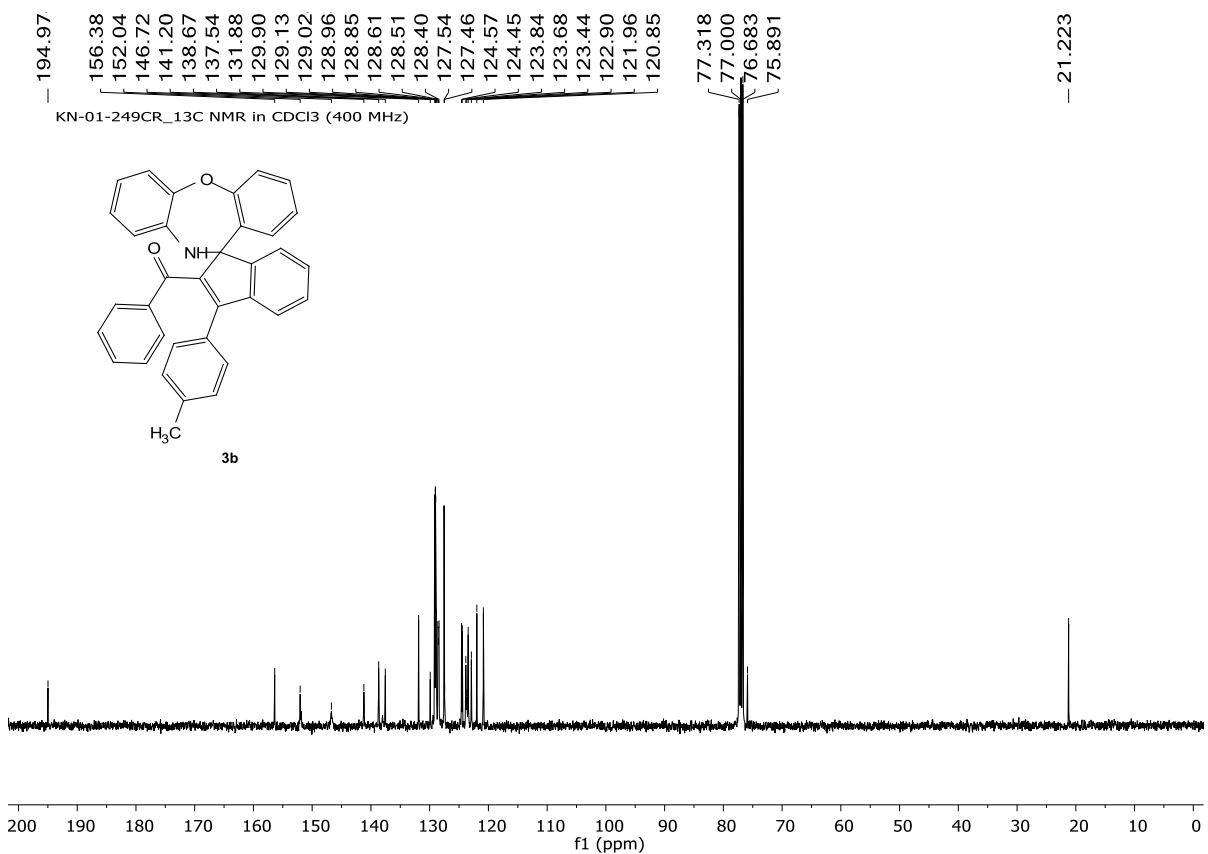

### <sup>1</sup>H NMR of 3c (400 MHz, CDCl<sub>3</sub>):

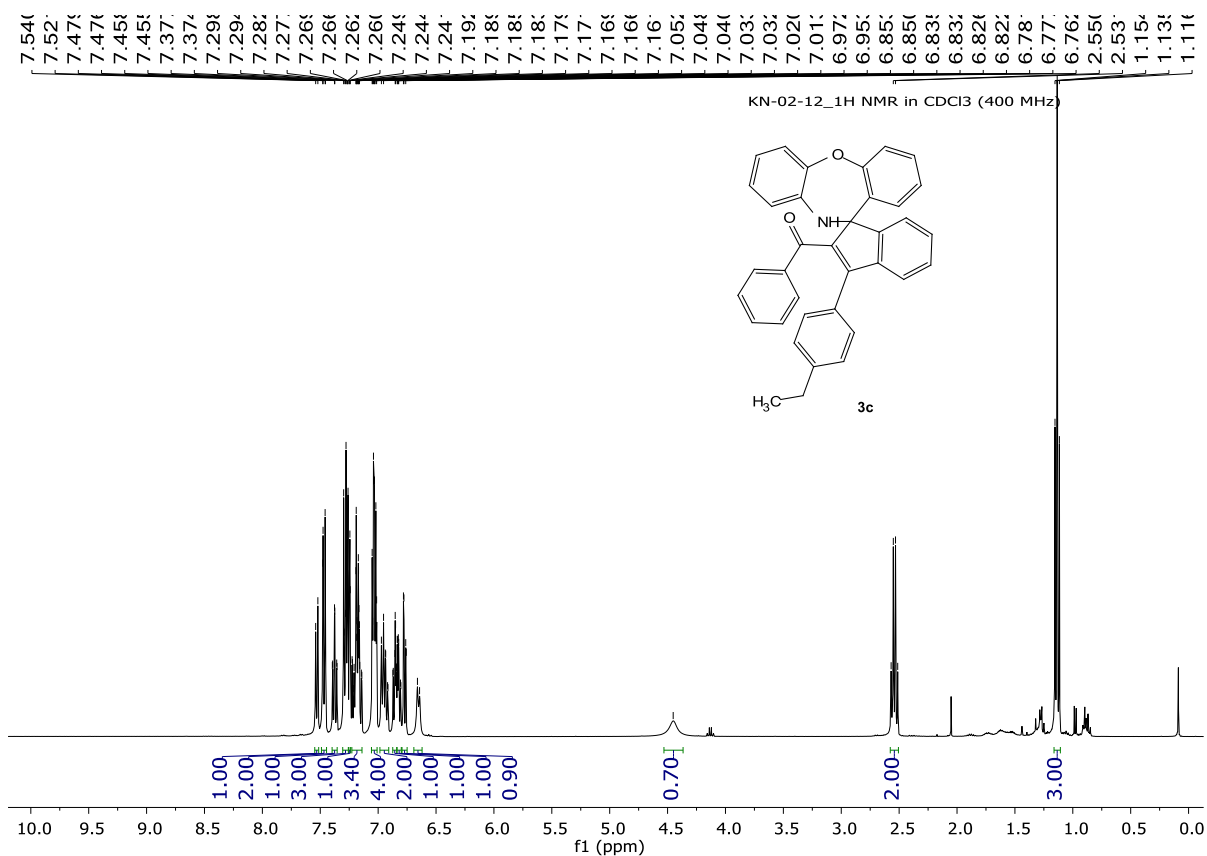

### <sup>13</sup>C NMR of 3c (100 MHz, CDCl<sub>3</sub>):

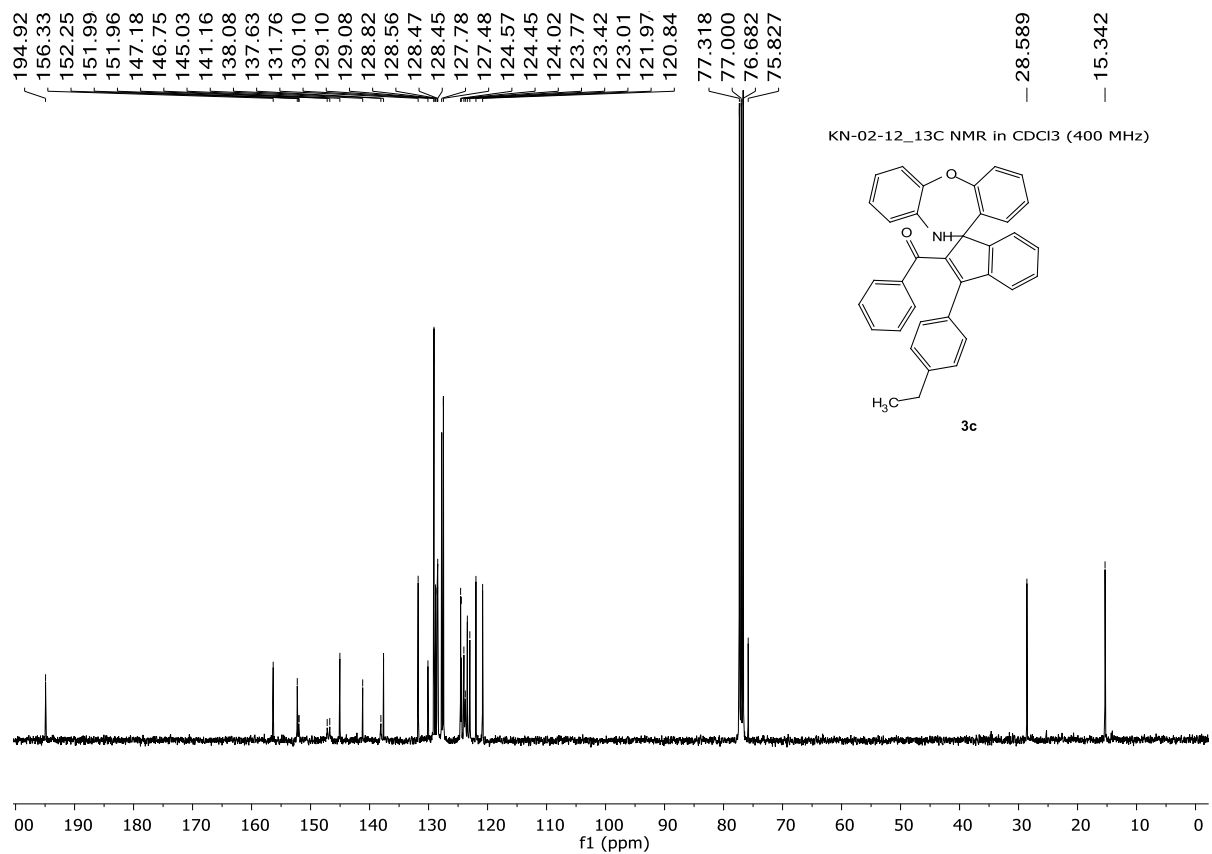

### <sup>1</sup>H NMR of 3d (400 MHz, CDCl<sub>3</sub>):

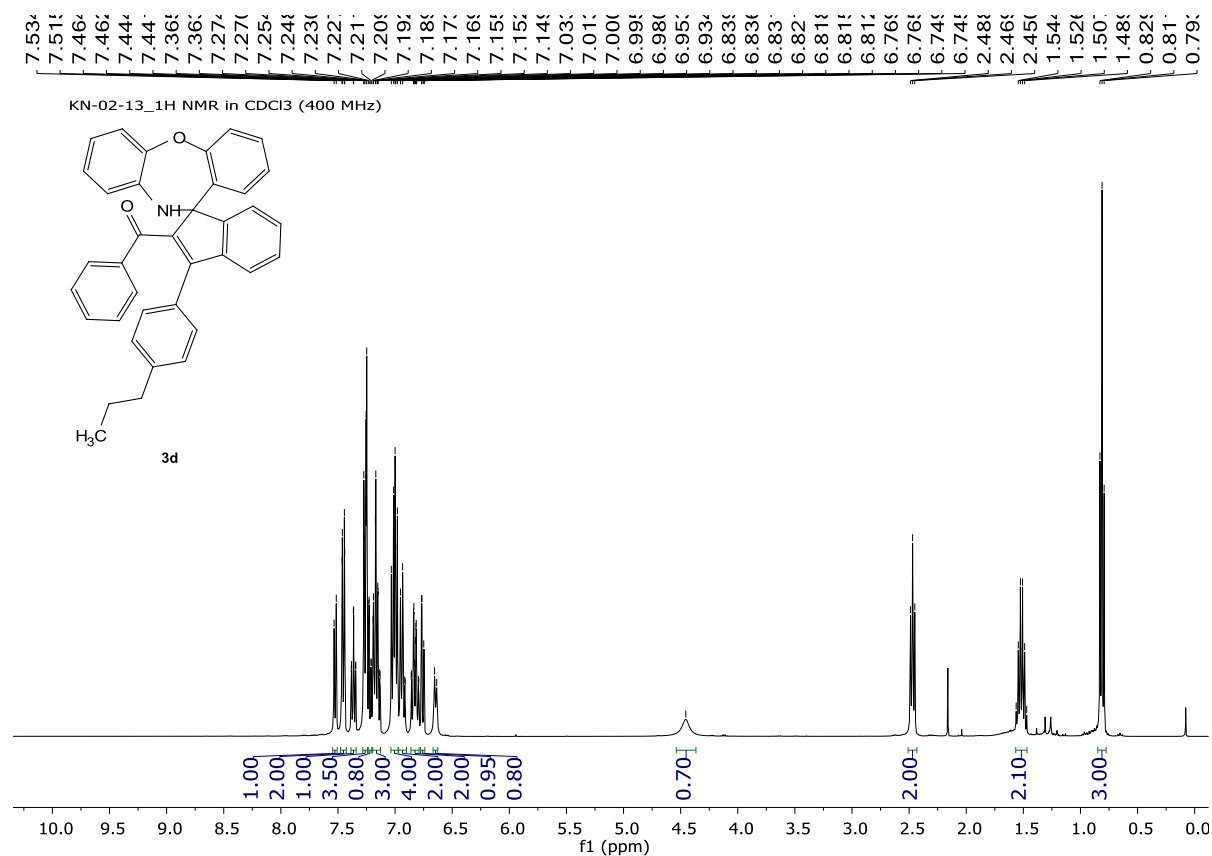

### <sup>13</sup>C NMR of 3d (100 MHz, CDCl<sub>3</sub>):

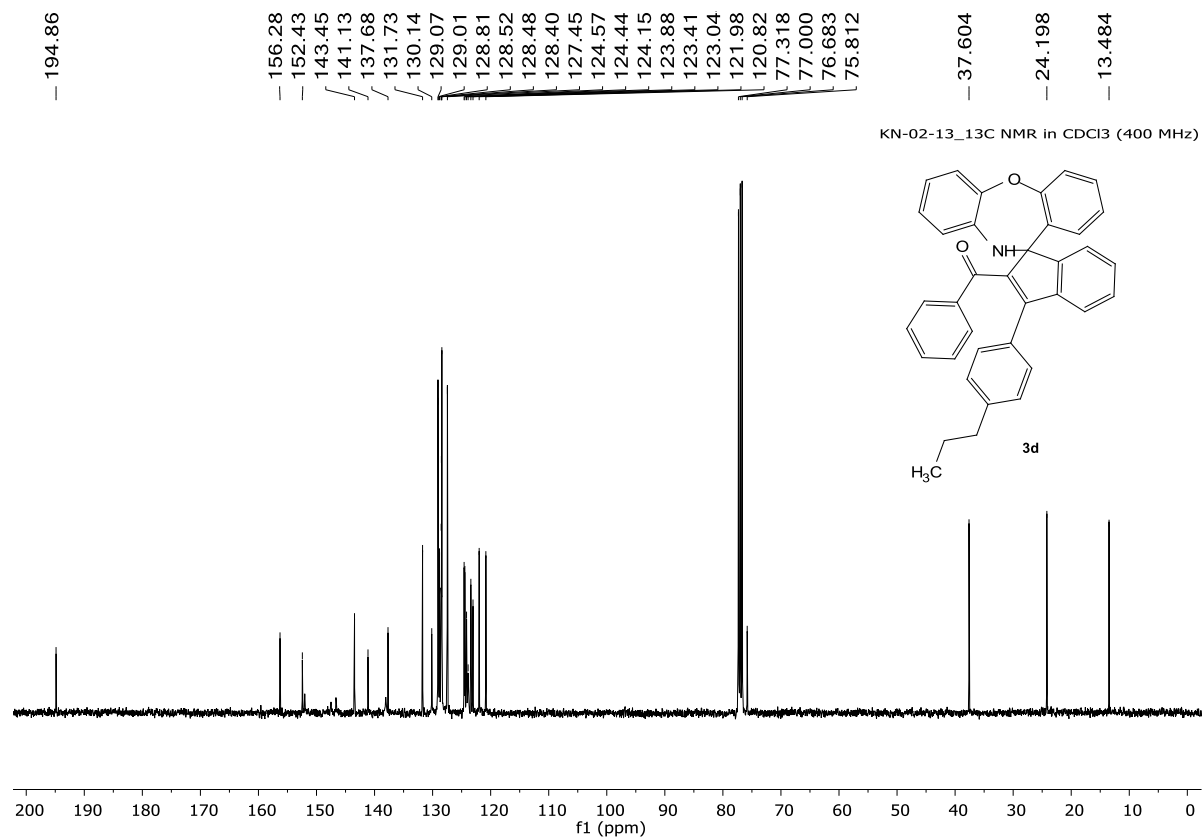

### <sup>1</sup>H NMR of 3e (400 MHz, CDCl<sub>3</sub>):

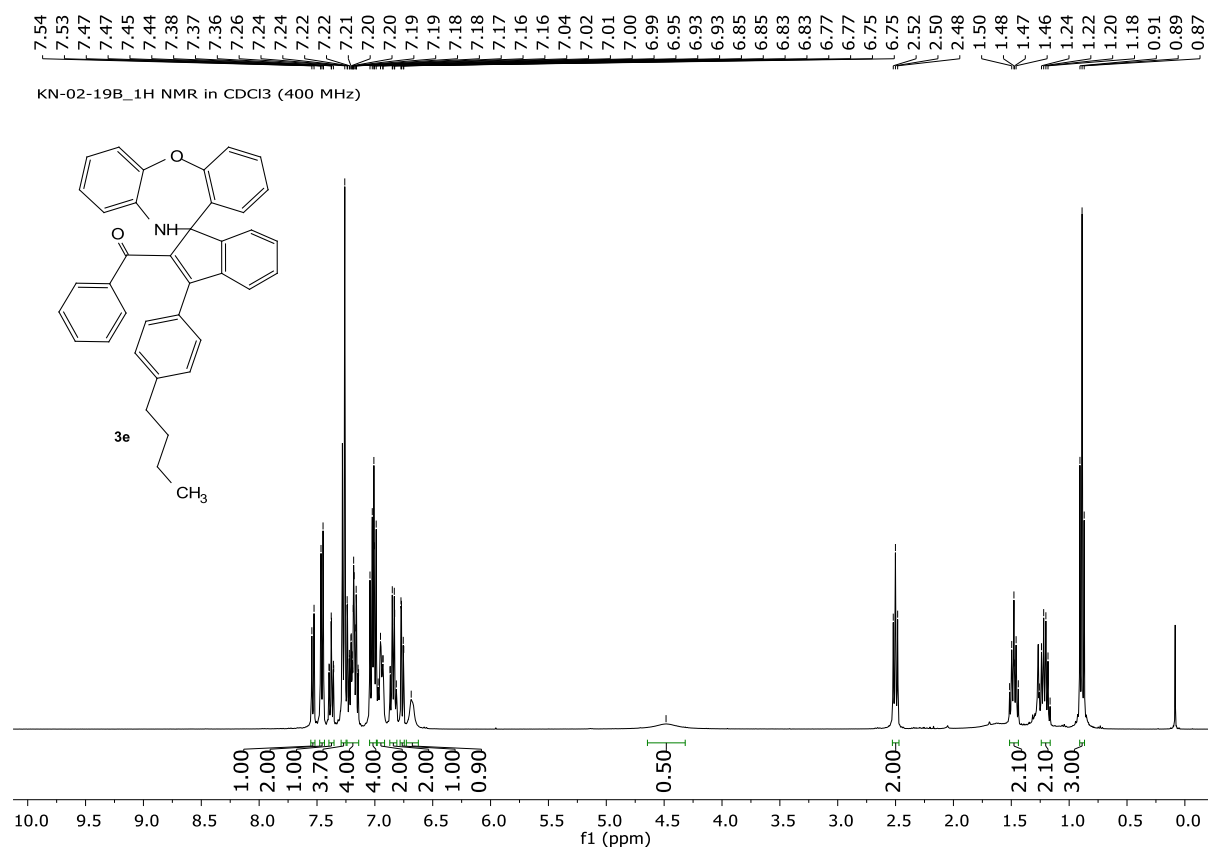

### <sup>13</sup>C NMR of 3e (100 MHz, CDCl<sub>3</sub>):

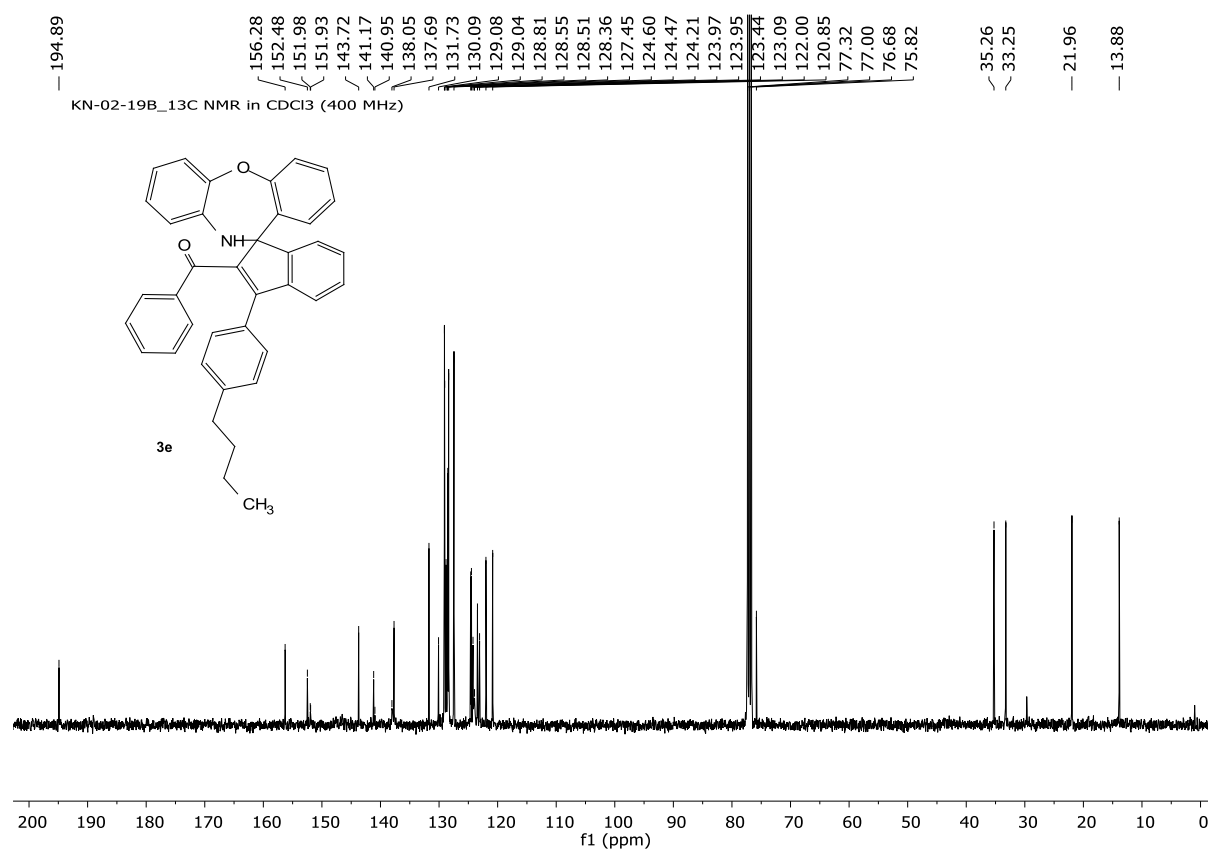

### <sup>1</sup>H NMR of 3f (400 MHz, CDCl<sub>3</sub>):

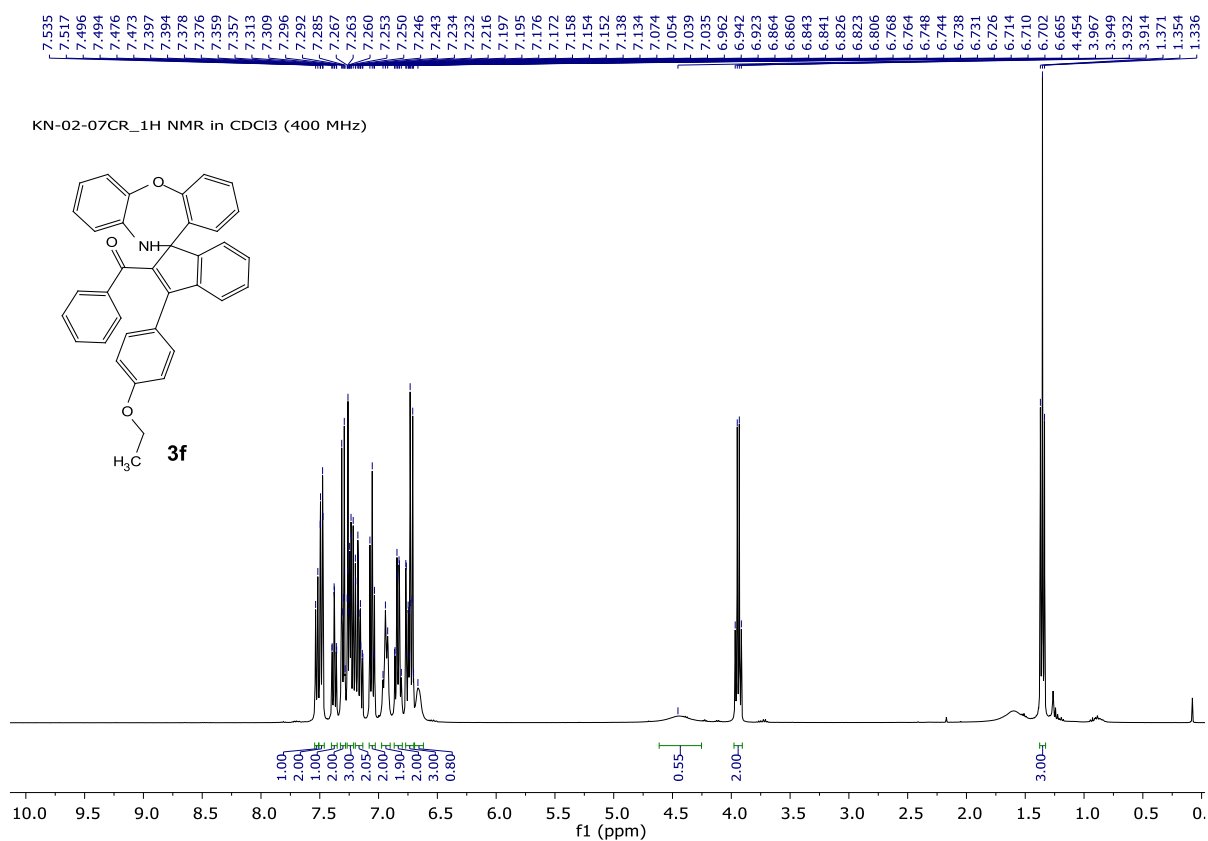

### <sup>13</sup>C NMR of 3f (100 MHz, CDCl<sub>3</sub>):

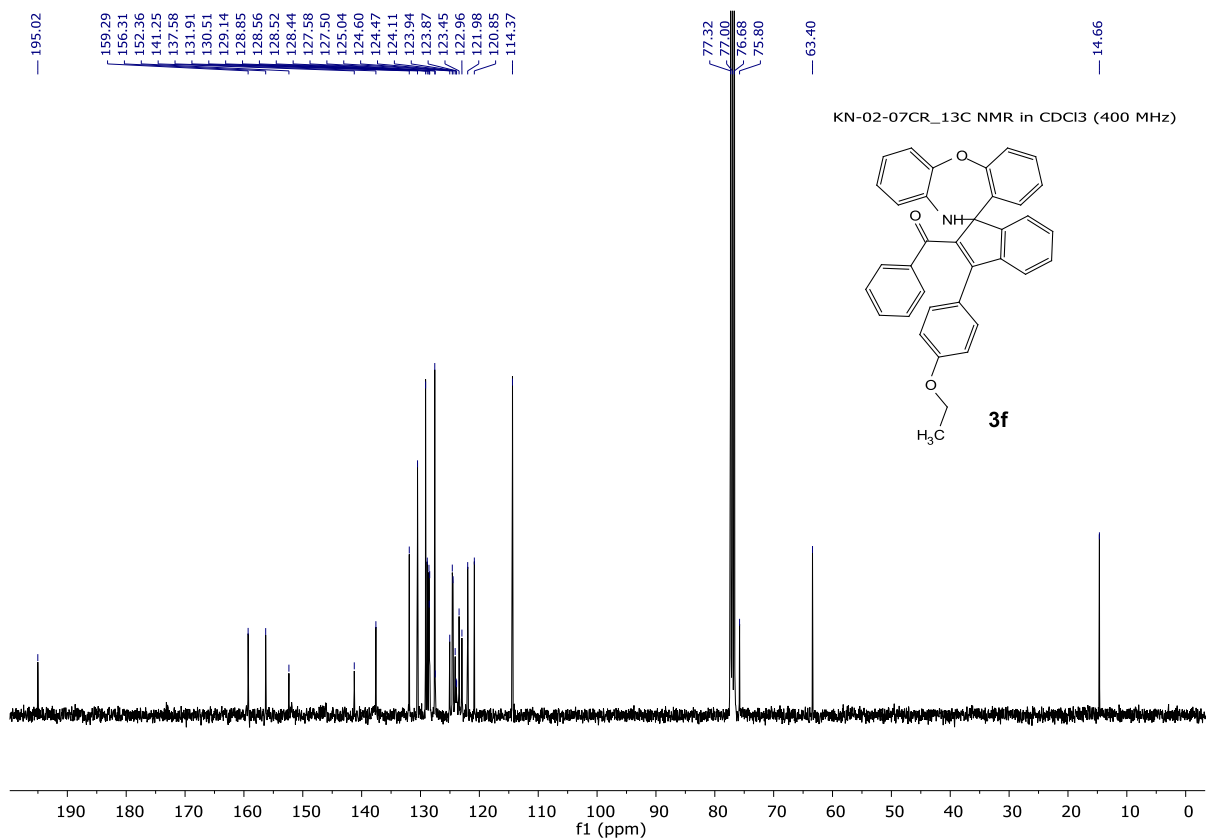

### <sup>1</sup>H NMR of 3g (400 MHz, CDCl<sub>3</sub>):

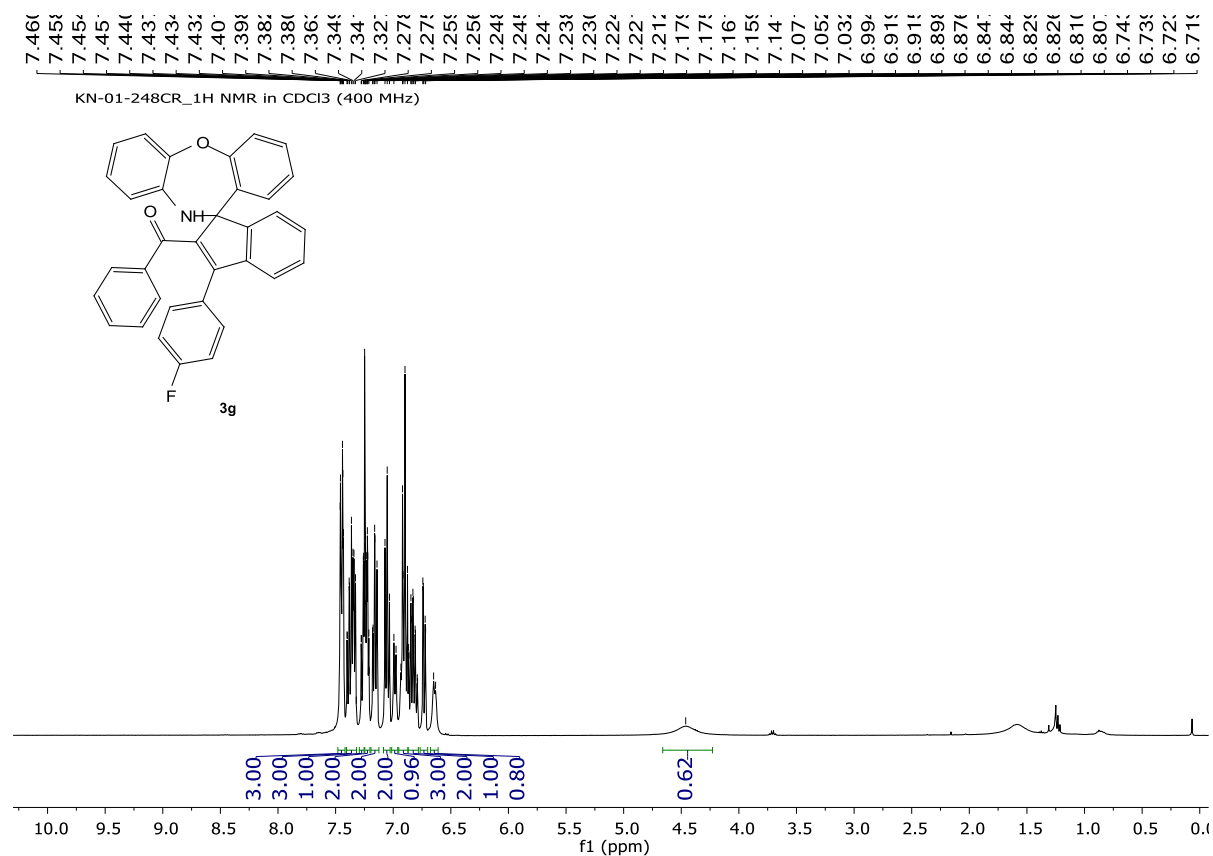

### <sup>13</sup>C NMR of 3g (100 MHz, CDCl<sub>3</sub>):

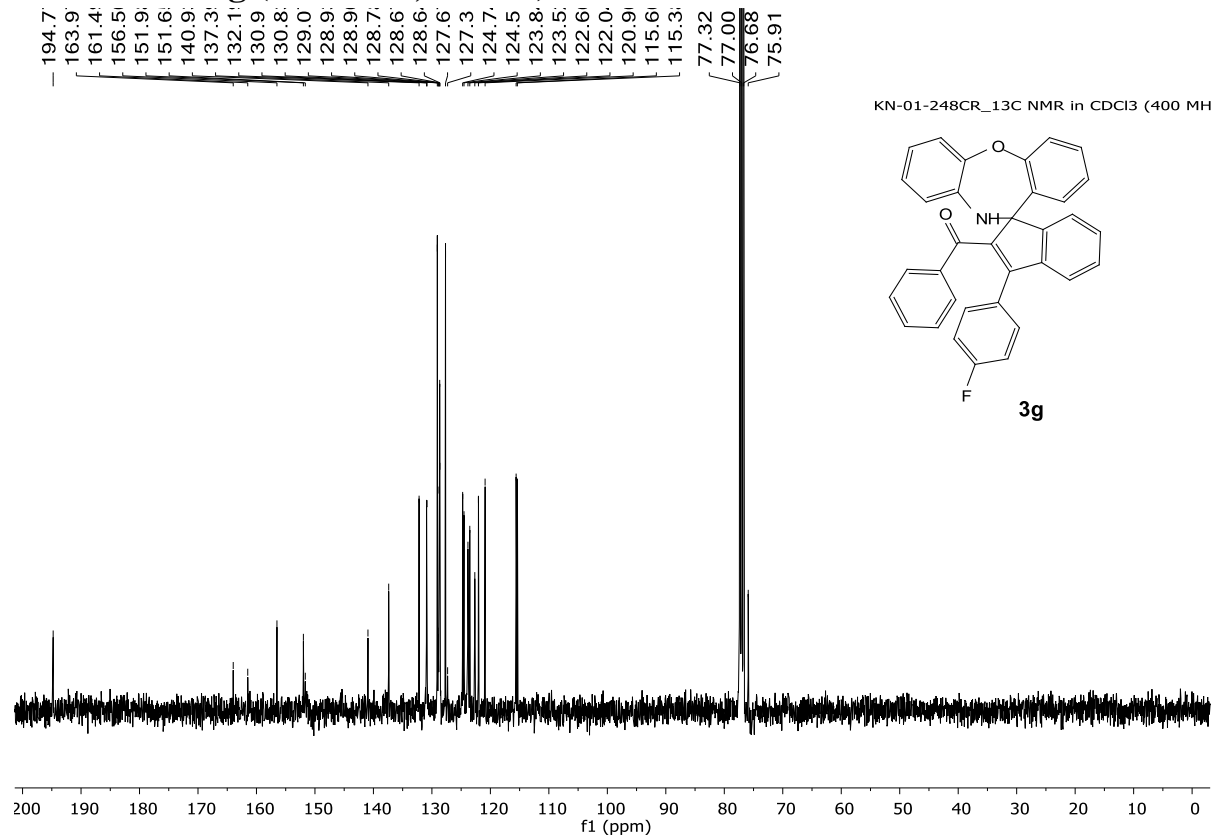

# $^{19}\text{F}$ NMR of 3g (376 MHz, $\text{CDCl}_3$ ):

KN-01-248\_19F NMR in  $\text{CDCl}_3$  (400 MHz)

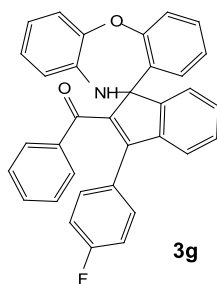

-111.75

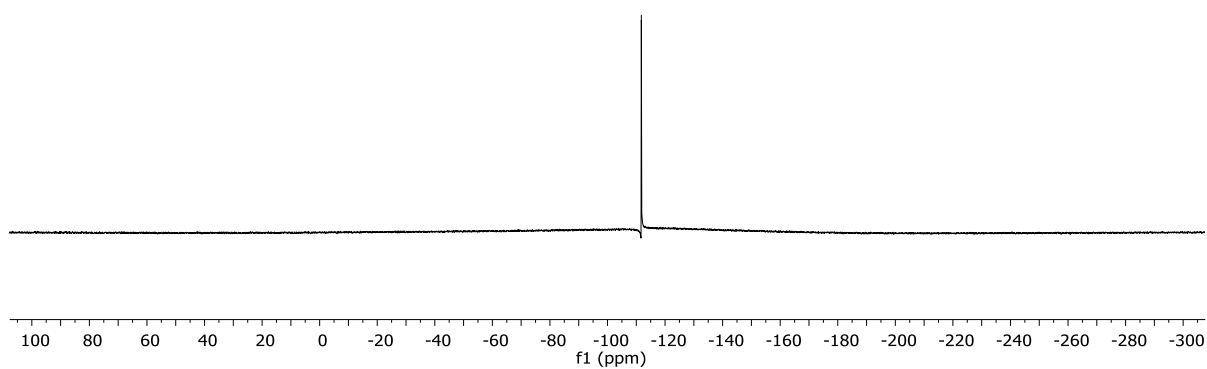



### <sup>1</sup>H NMR of 3h (400 MHz, CDCl<sub>3</sub>):

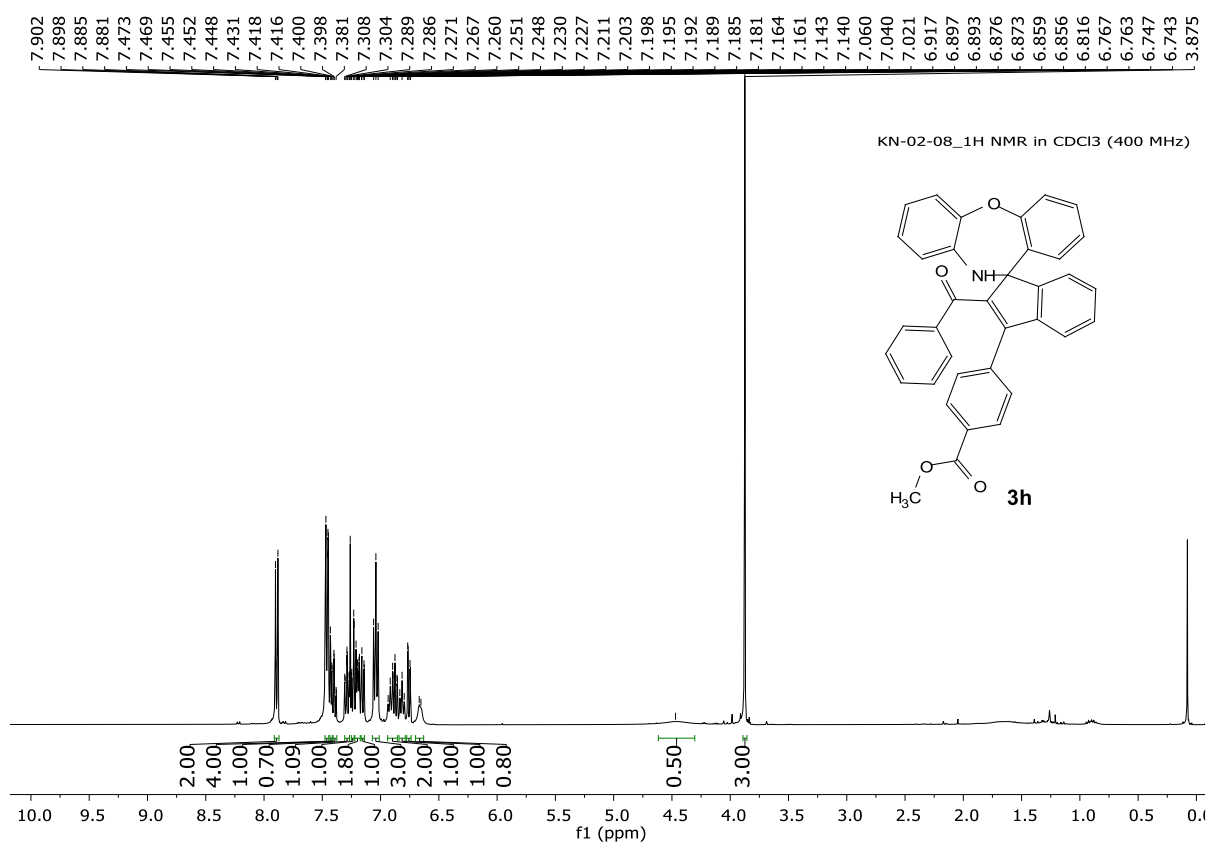

### <sup>13</sup>C NMR of 3h (100 MHz, CDCl<sub>3</sub>):

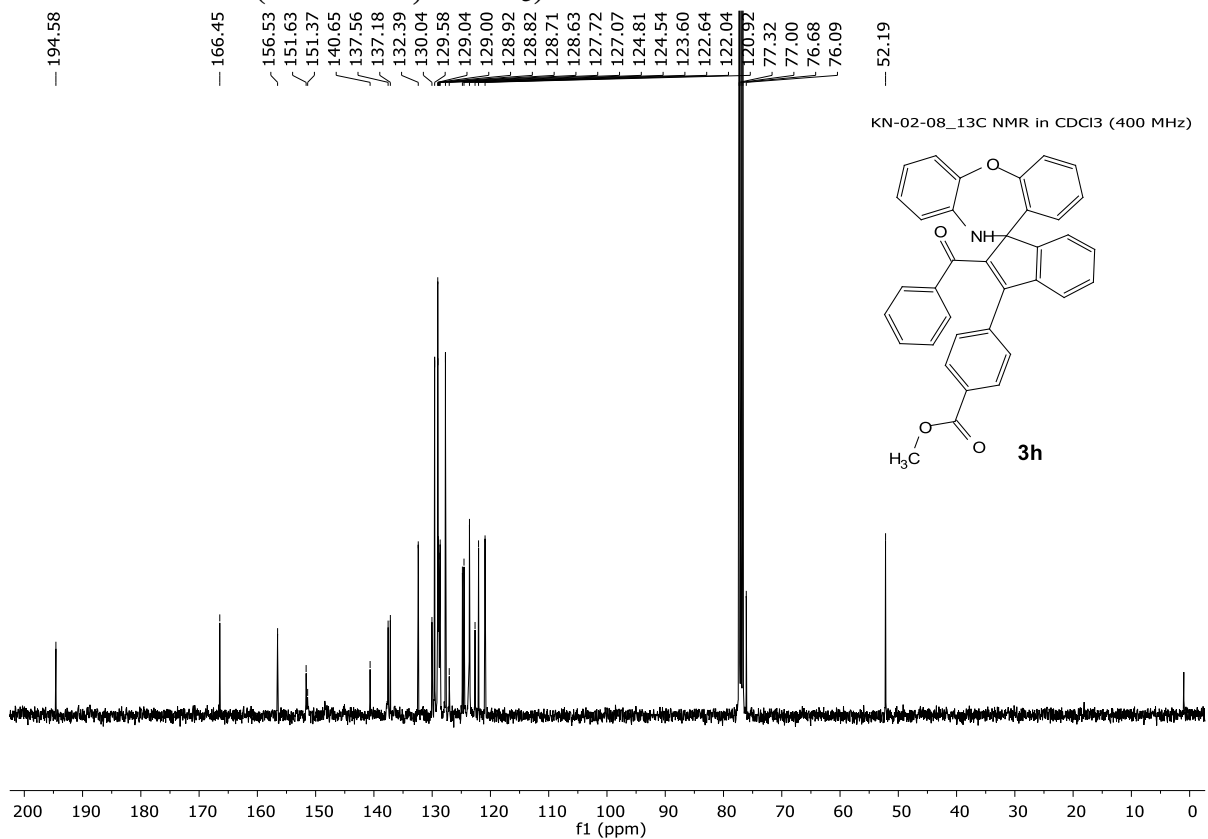

### <sup>1</sup>H NMR of 3i (400 MHz, CDCl<sub>3</sub>):

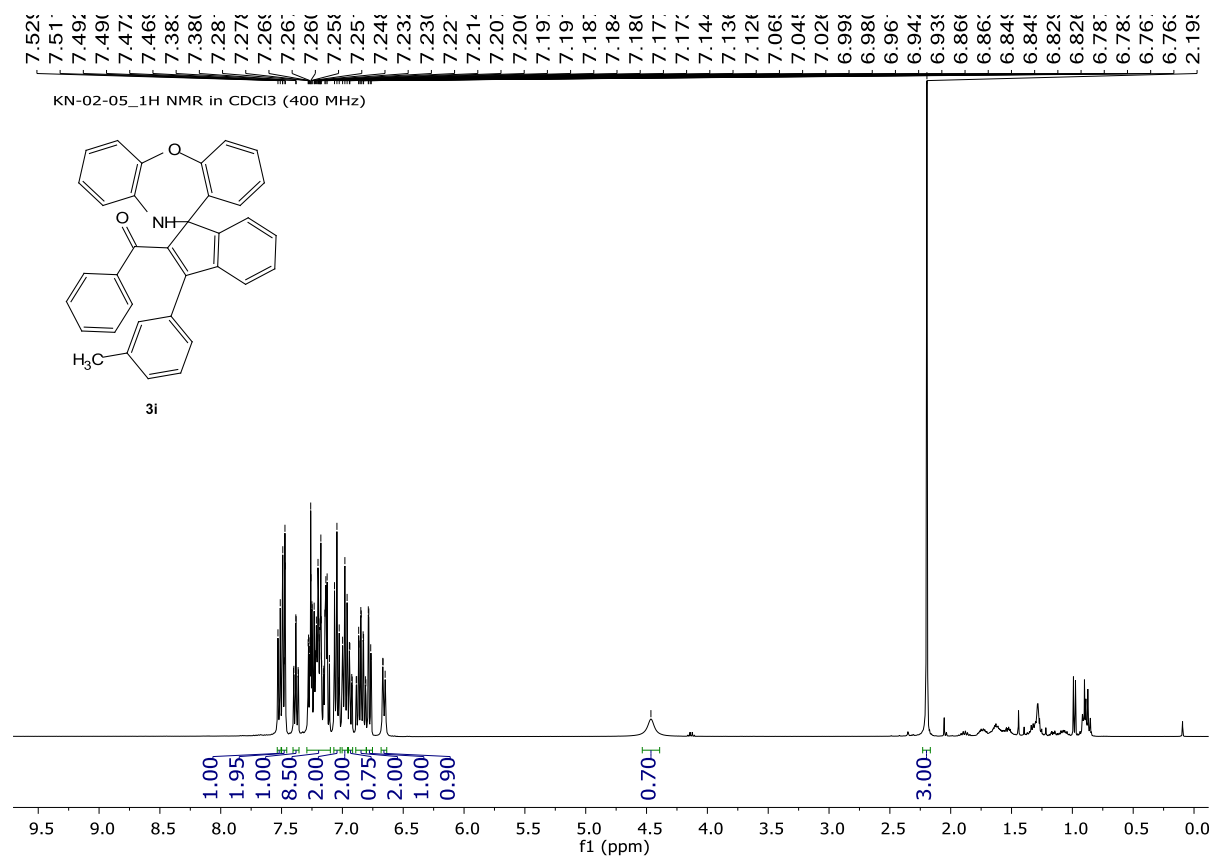

### <sup>13</sup>C NMR of 3i (100 MHz, CDCl<sub>3</sub>):

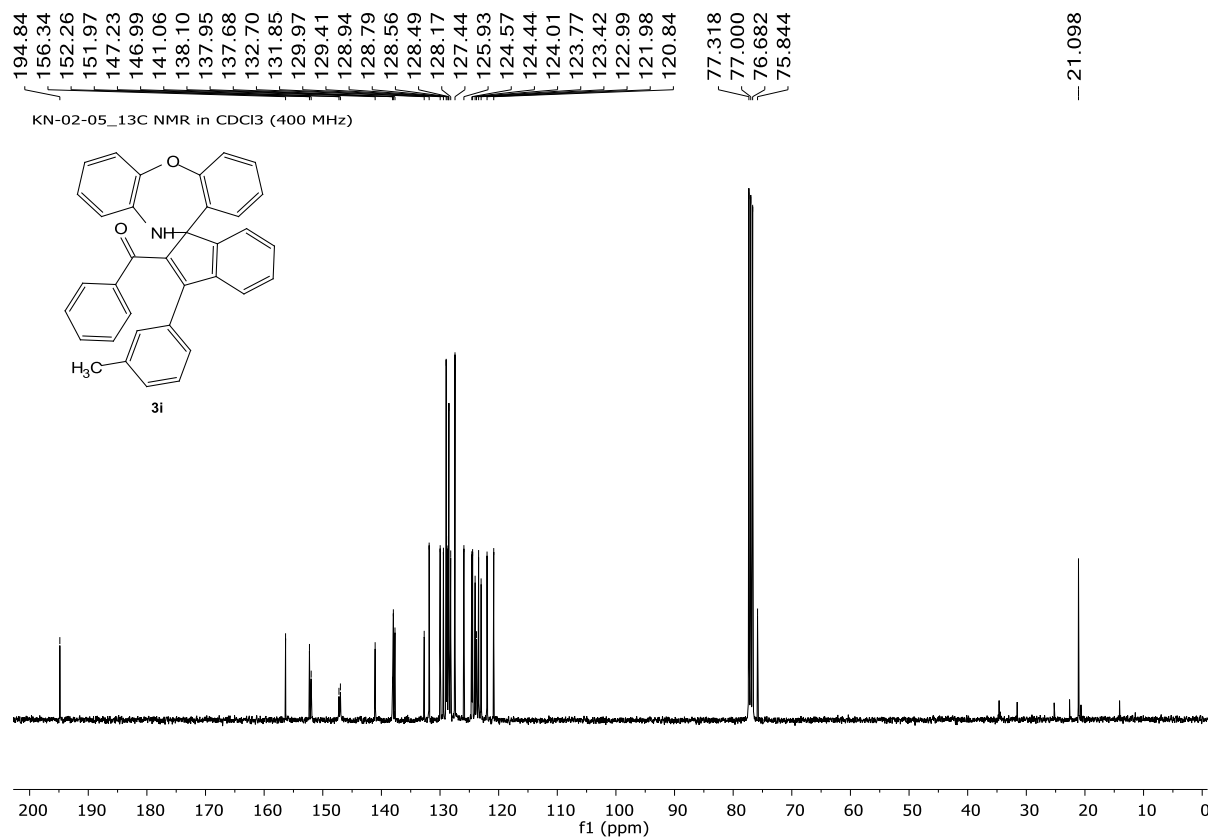

### <sup>1</sup>H NMR of 3j (400 MHz, CDCl<sub>3</sub>):

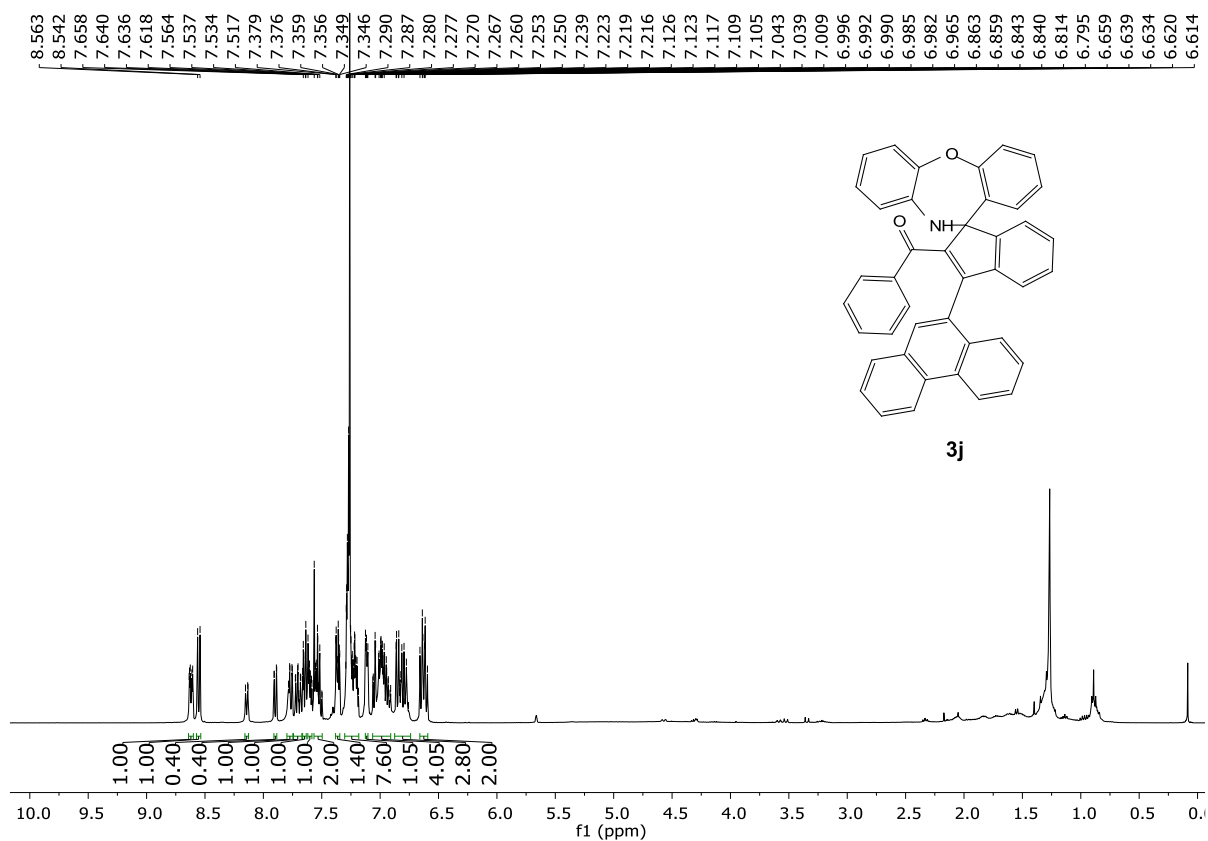

### <sup>13</sup>C NMR of 3j (100 MHz, CDCl<sub>3</sub>):

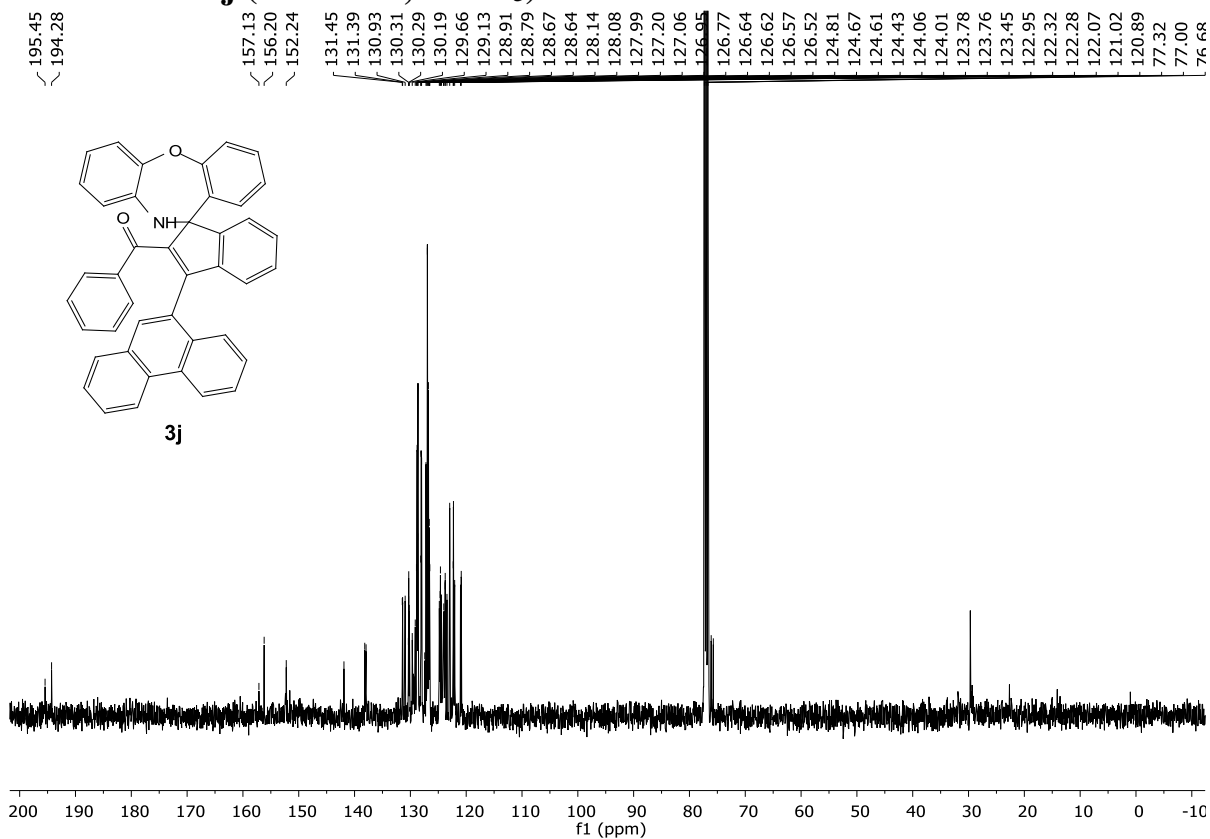

### <sup>1</sup>H NMR of 3k (400 MHz, CDCl<sub>3</sub>):

7.801  
7.782  
7.585  
7.583  
7.569  
7.565  
7.562  
7.461  
7.458  
7.442  
7.439  
7.423  
7.420  
7.314  
7.311  
7.308  
7.306  
7.292  
7.290  
7.287  
7.286  
7.282  
7.277  
7.272  
7.270  
7.260  
7.223  
7.219  
7.202  
7.199  
7.183  
7.179  
7.166  
7.162  
7.159  
7.146  
7.142  
7.138  
7.127  
7.124  
7.118  
7.115  
7.108  
7.051  
7.032  
6.902  
6.900  
6.887  
6.884  
6.878  
6.875  
6.869  
6.866  
6.856  
6.842  
6.838  
6.809  
6.806  
6.790  
6.787  
6.773  
6.770  
6.754  
6.750  
6.595  
6.592  
6.576  
6.573  
4.309

KN-02-59B\_1H NMR in CDCl<sub>3</sub> (400 MHz)

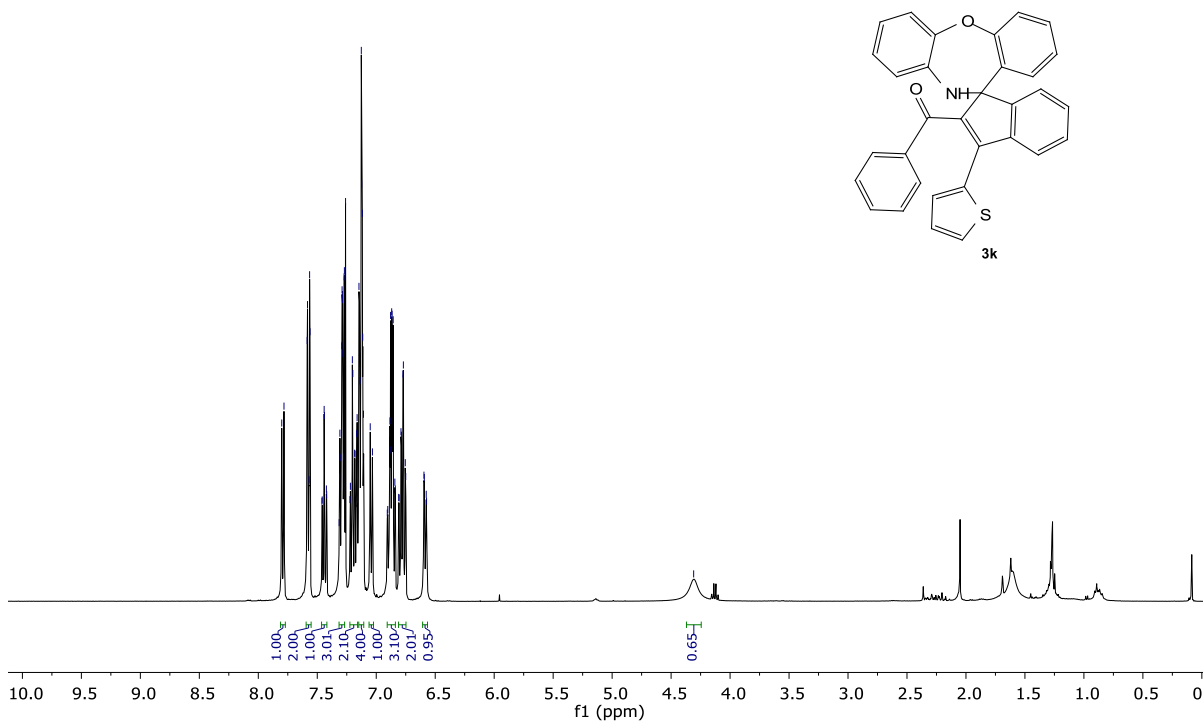

### <sup>13</sup>C NMR of 3k (100 MHz, CDCl<sub>3</sub>):

194.92  
156.52  
151.33  
151.26  
147.66  
140.39  
138.08  
137.77  
137.26  
133.47  
132.32  
129.45  
128.94  
128.85  
128.74  
128.53  
127.77  
127.49  
127.36  
127.14  
124.61  
124.48  
123.53  
123.33  
123.21  
122.77  
121.93  
120.88  
77.32  
77.00  
76.68  
75.97

KN-02-59B\_13C NMR in CDCl<sub>3</sub> (400 MHz)

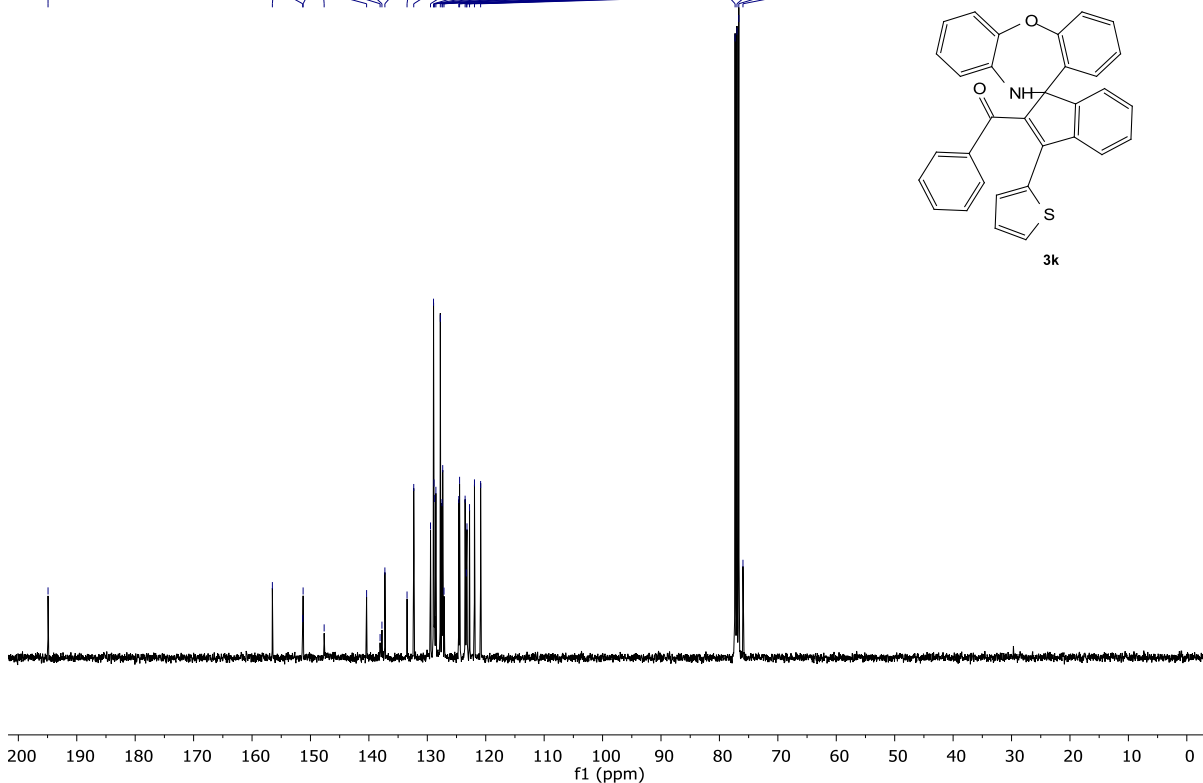

### <sup>1</sup>H NMR of 31 (400 MHz, CDCl<sub>3</sub>):

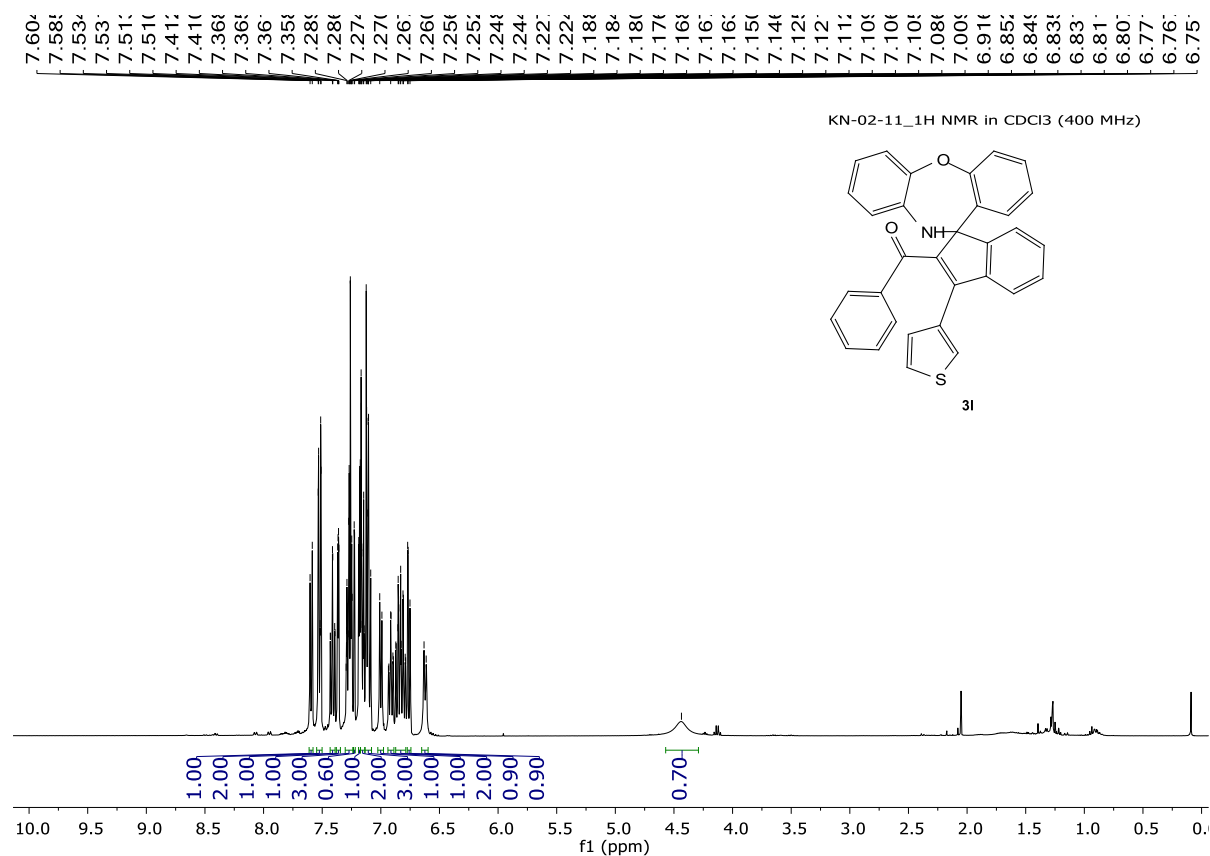

### <sup>13</sup>C NMR of 31 (100 MHz, CDCl<sub>3</sub>):

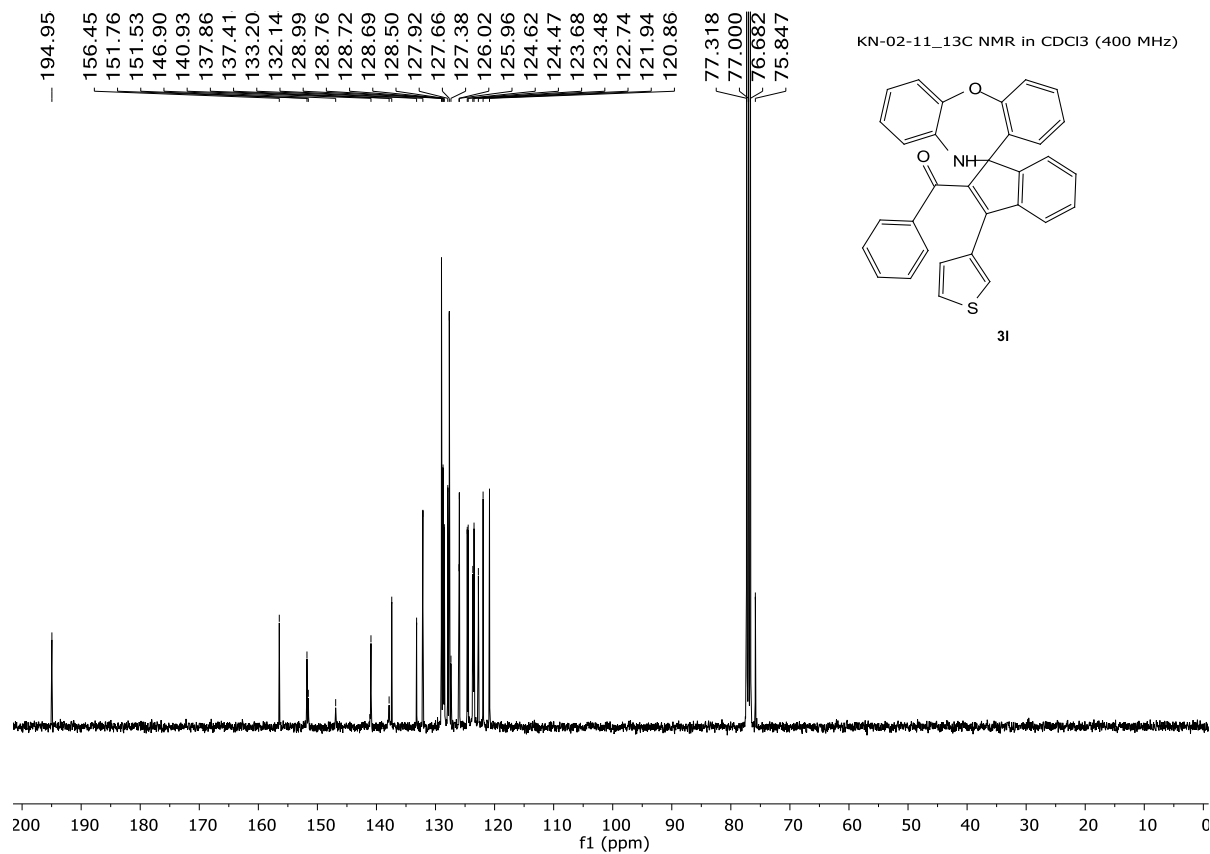

### <sup>1</sup>H NMR of 3m (400 MHz, CDCl<sub>3</sub>):

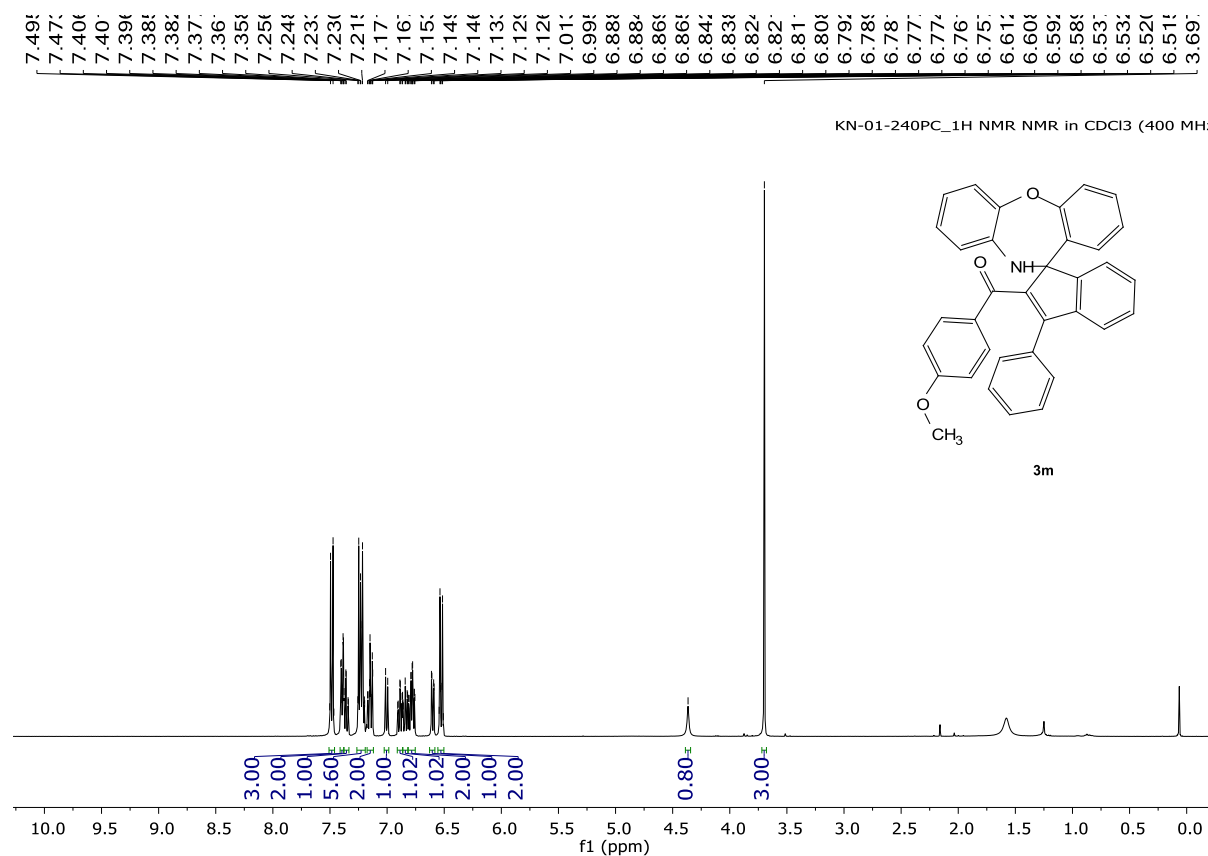

### <sup>13</sup>C NMR of 3m (100 MHz, CDCl<sub>3</sub>):

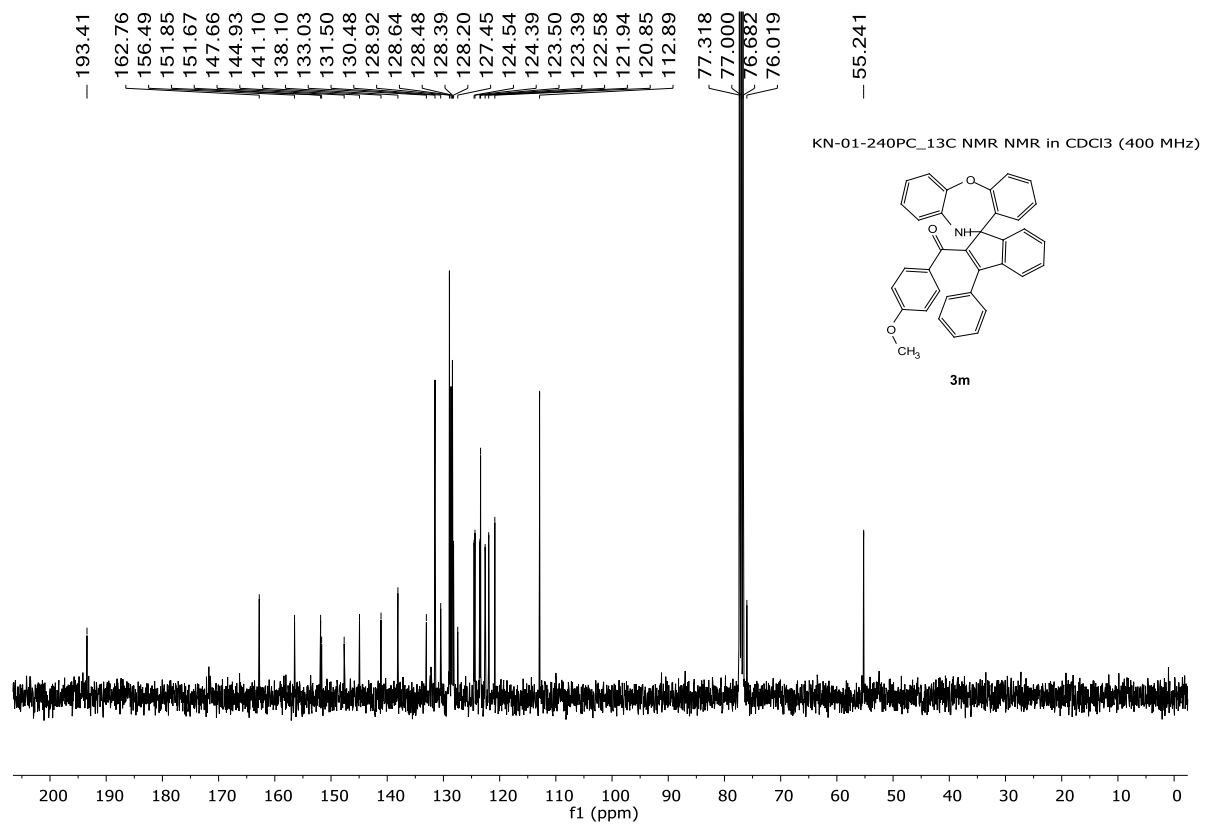

### <sup>1</sup>H NMR of 3n (400 MHz, CDCl<sub>3</sub>):

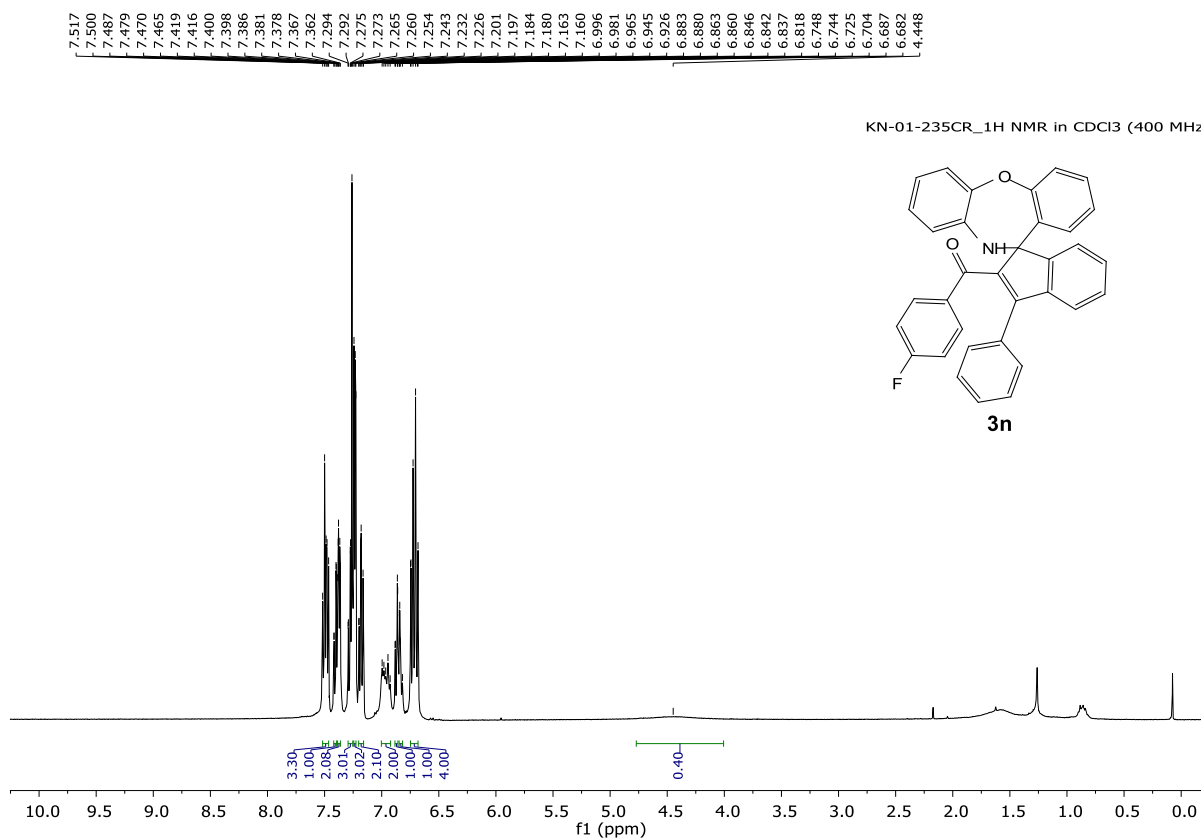

### <sup>13</sup>C NMR of 3n (100 MHz, CDCl<sub>3</sub>):

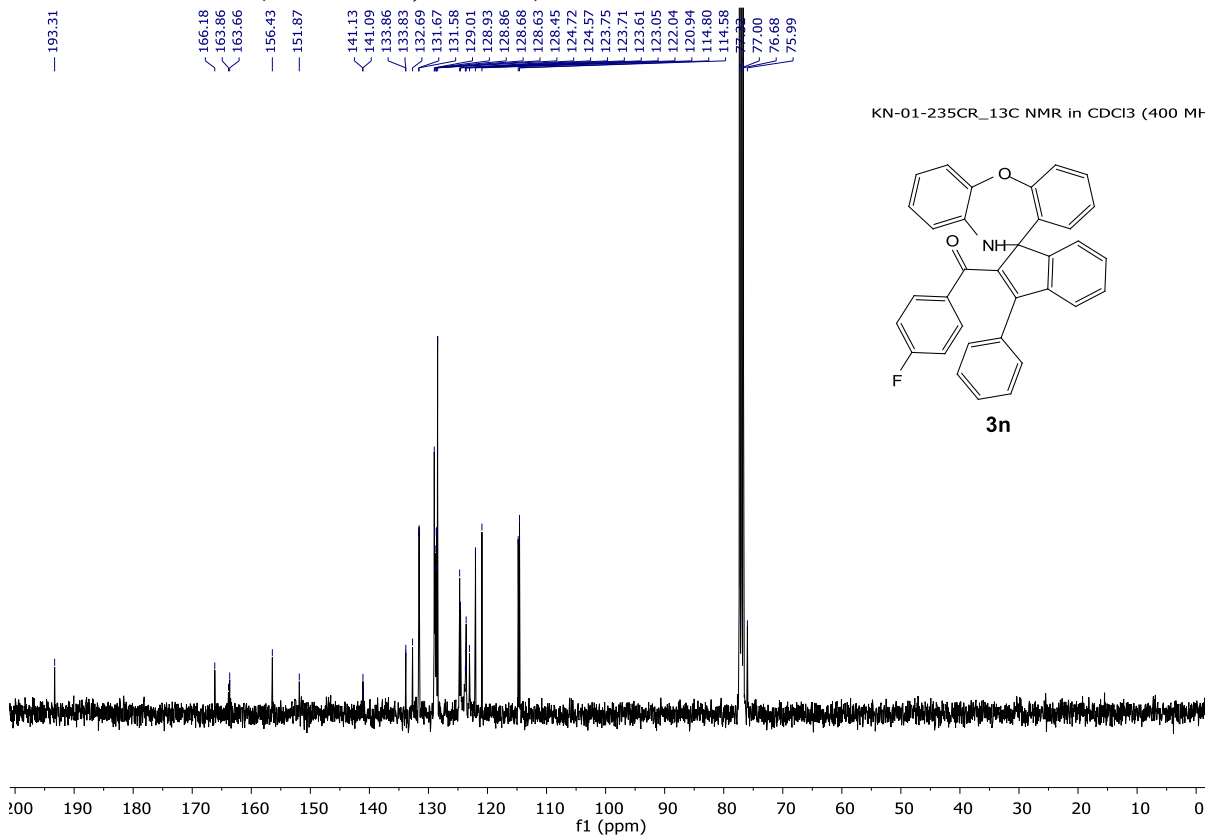

# $^{19}\text{F}$ NMR of **3n** (376 MHz, $\text{CDCl}_3$ ):

KN-01-235\_19F NMR in  $\text{CDCl}_3$  (400 MHz)

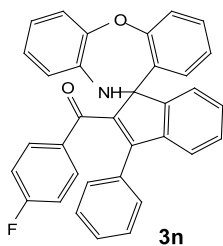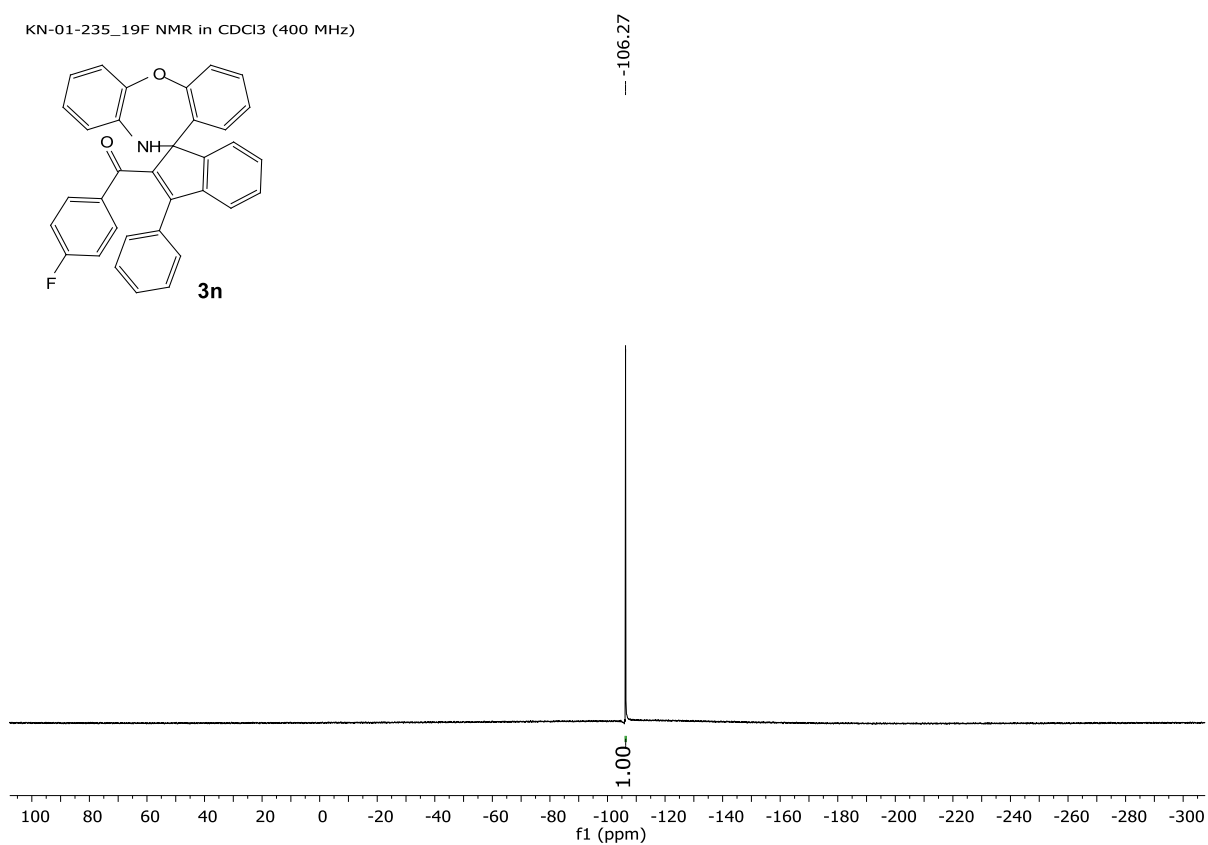



### <sup>1</sup>H NMR of 3o (400 MHz, CDCl<sub>3</sub>):

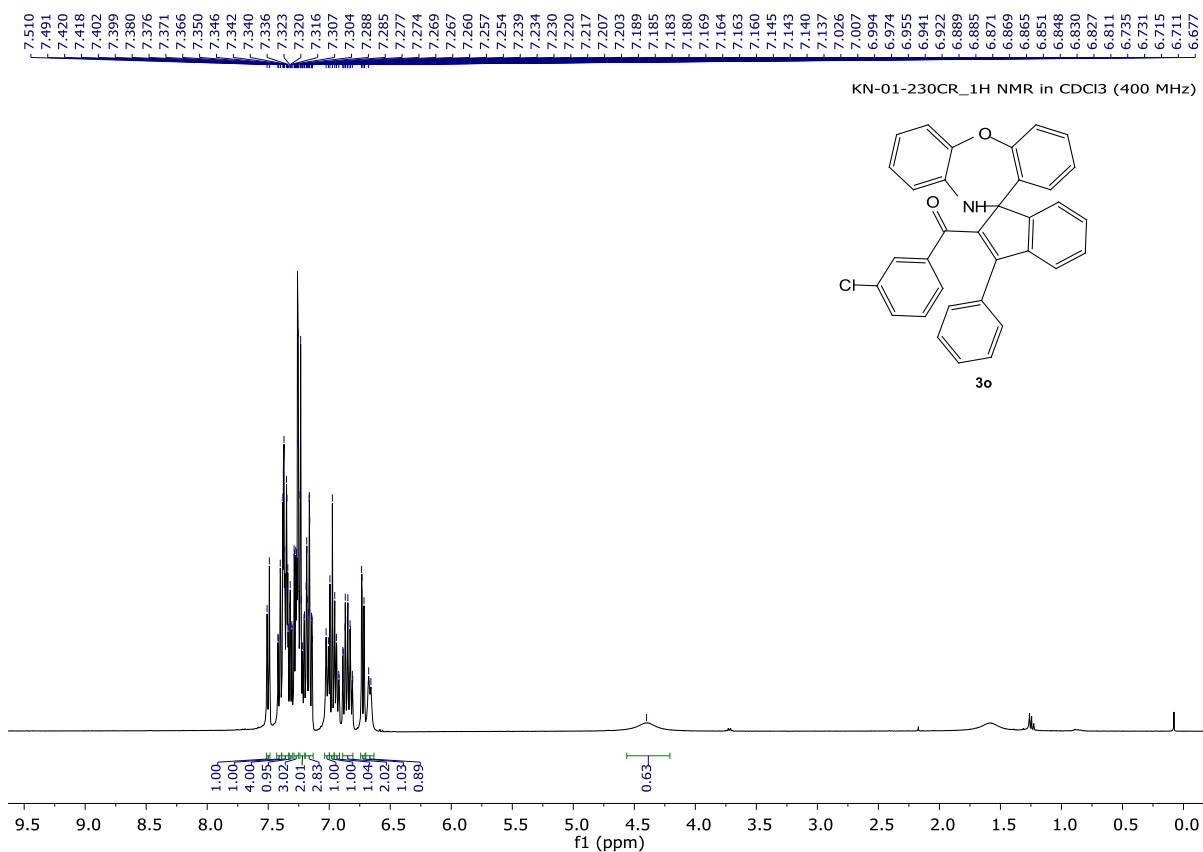

### <sup>13</sup>C NMR of 3o (100 MHz, CDCl<sub>3</sub>):

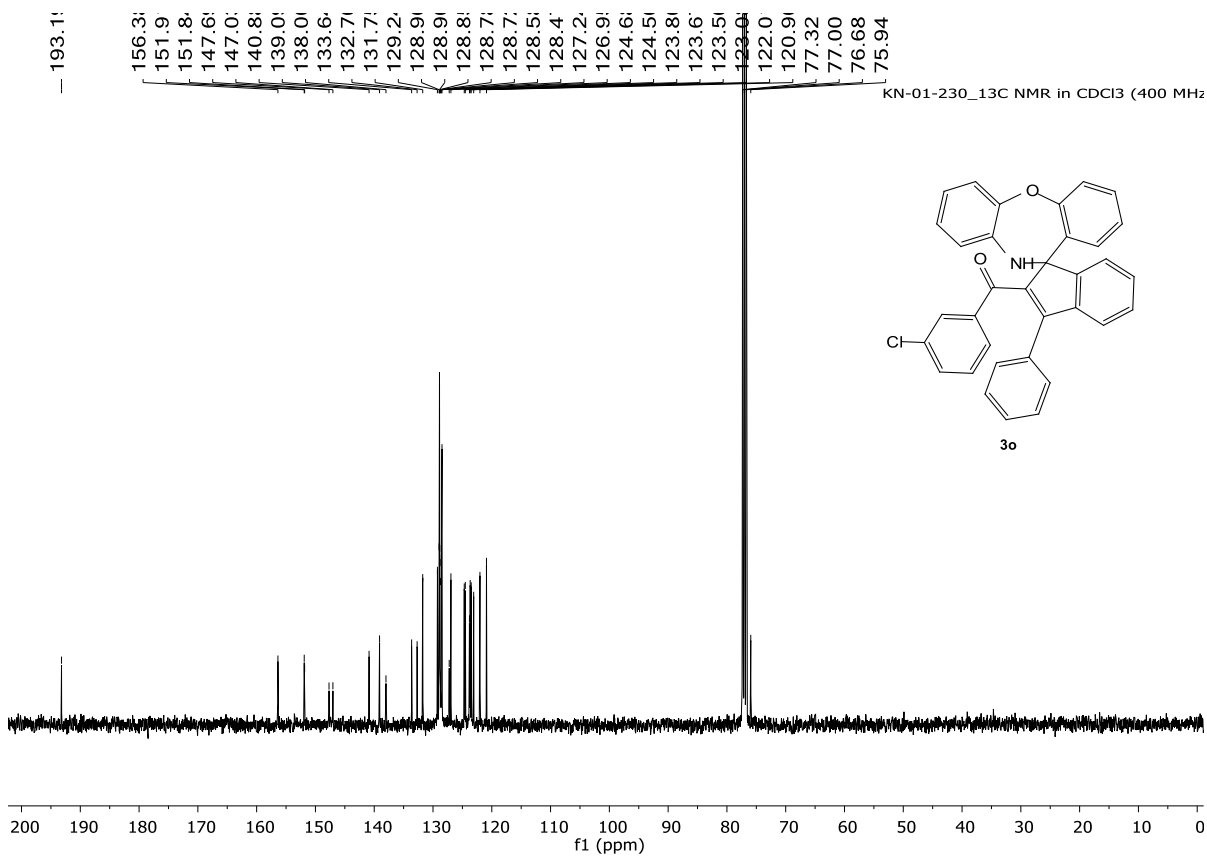

### <sup>1</sup>H NMR of 3p (400 MHz, CDCl<sub>3</sub>):

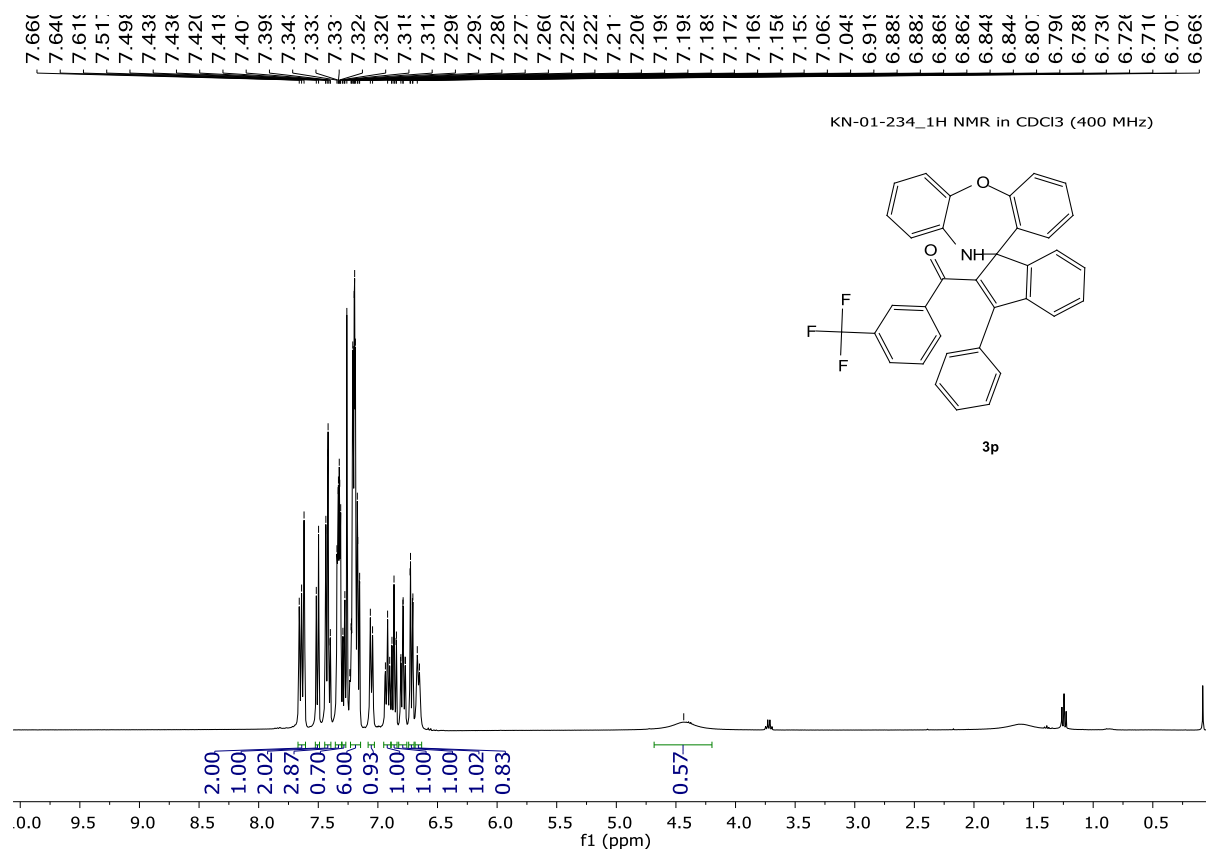

### <sup>13</sup>C NMR of 3p (100 MHz, CDCl<sub>3</sub>):

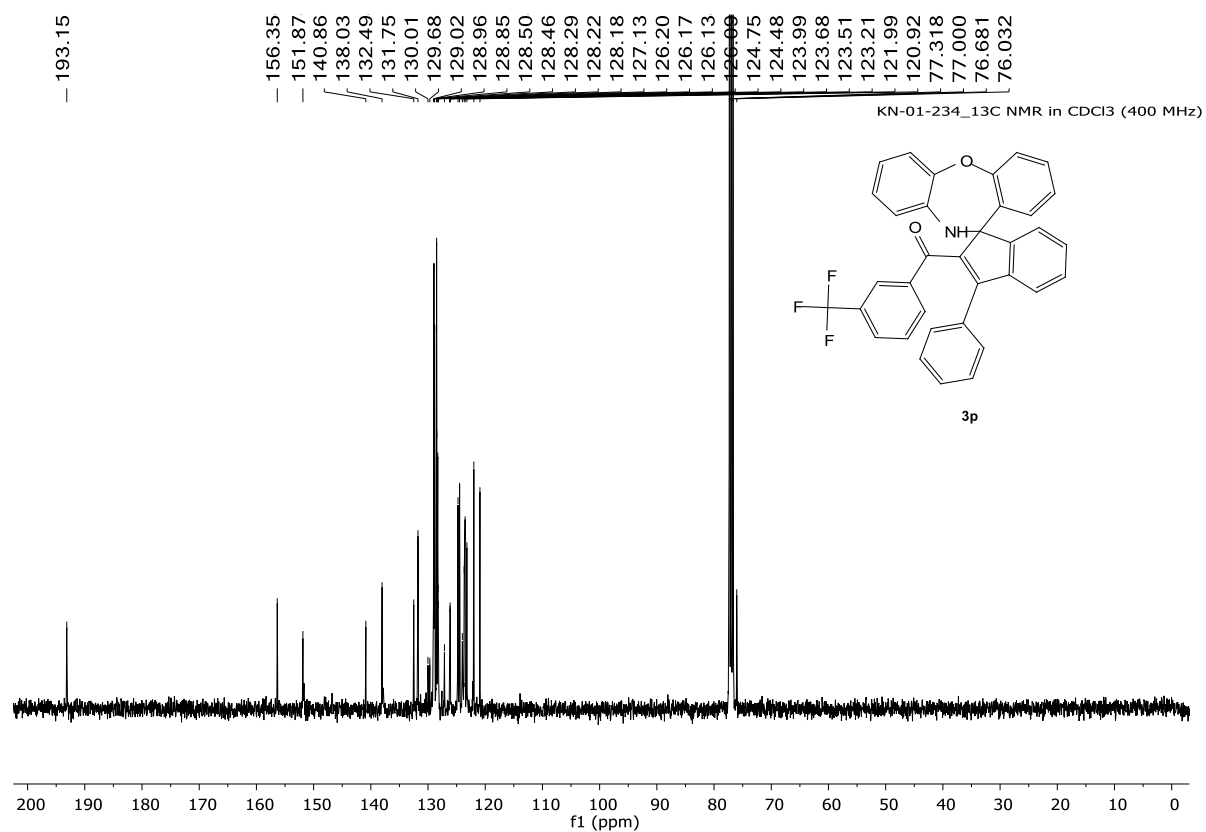

# $^{19}\text{F}$ NMR of **3p** (376 MHz, $\text{CDCl}_3$ ):

KN-01-234\_19F NMR in  $\text{CDCl}_3$  (400 MHz)

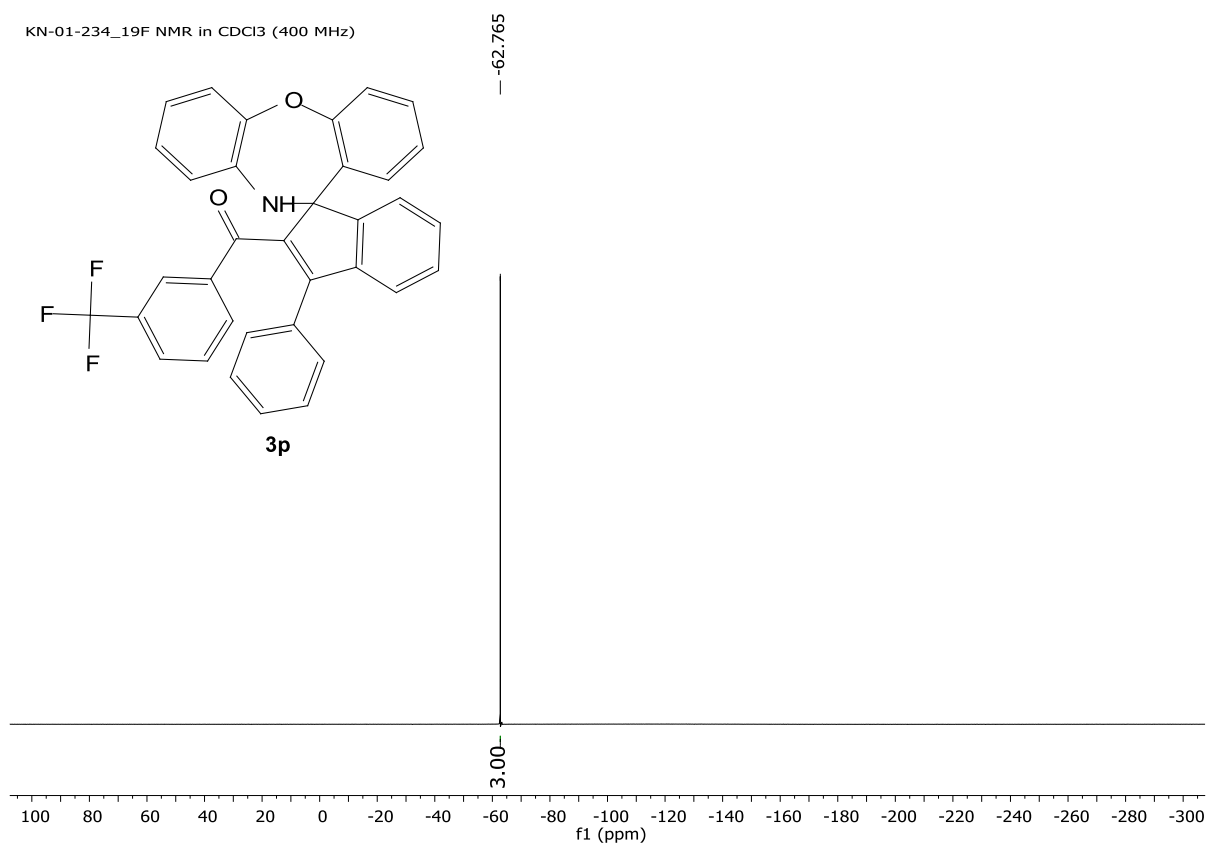

### <sup>1</sup>H NMR of 3q (400 MHz, CDCl<sub>3</sub>):

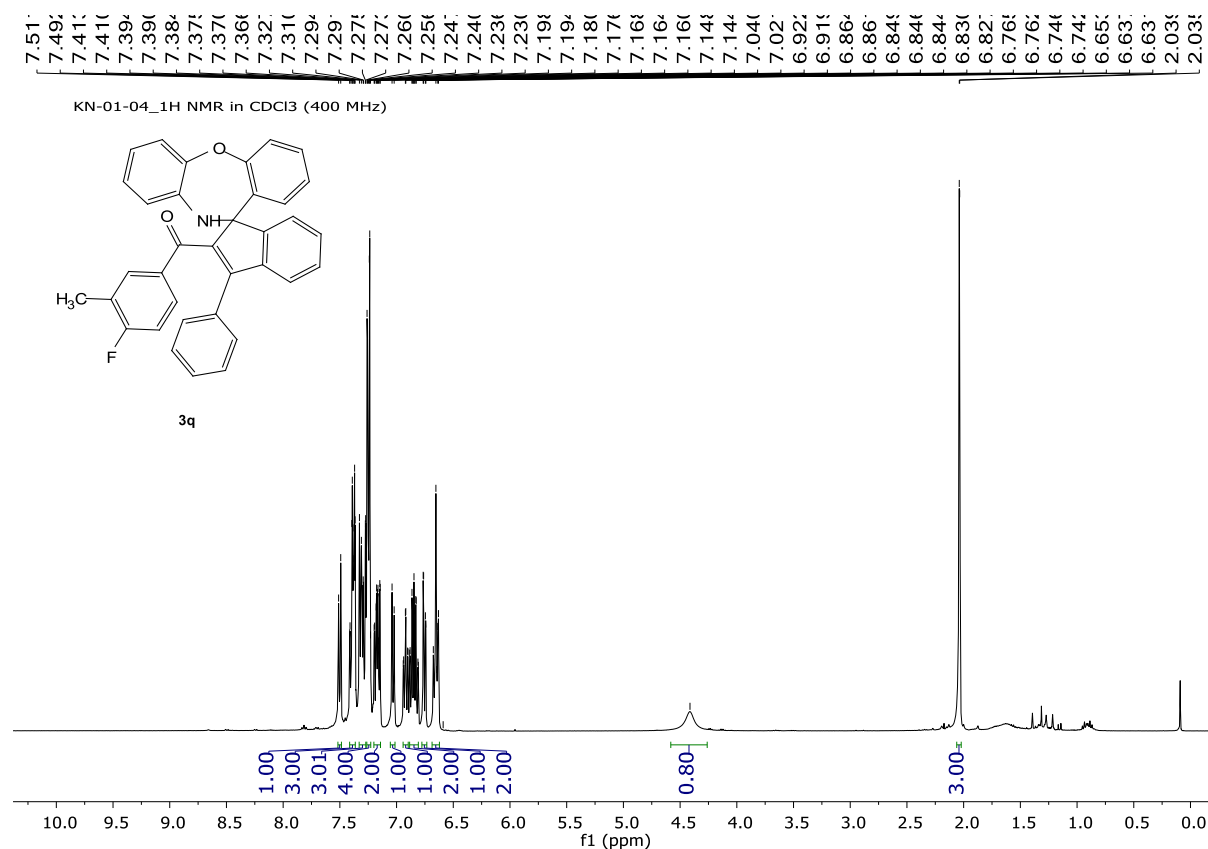

### <sup>13</sup>C NMR of 3q (100 MHz, CDCl<sub>3</sub>):

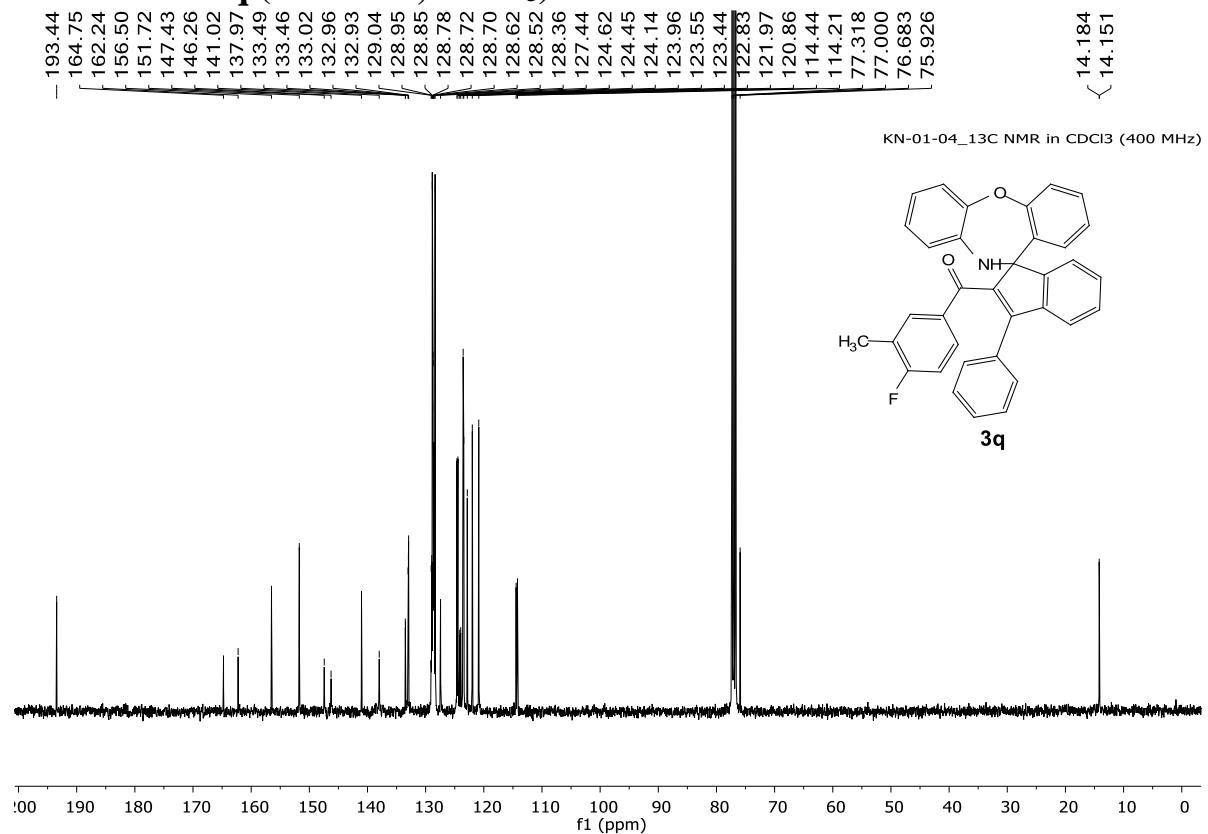

**$^{19}\text{F}$  NMR of 3q (376 MHz,  $\text{CDCl}_3$ ):**

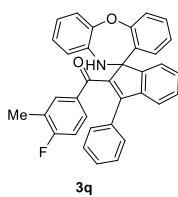

— -110.544

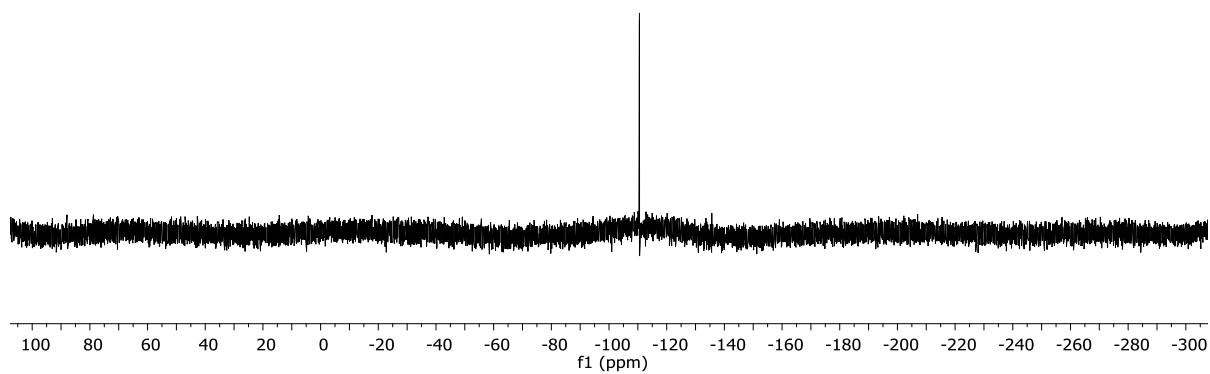

### <sup>1</sup>H NMR of 3r (400 MHz, CDCl<sub>3</sub>):

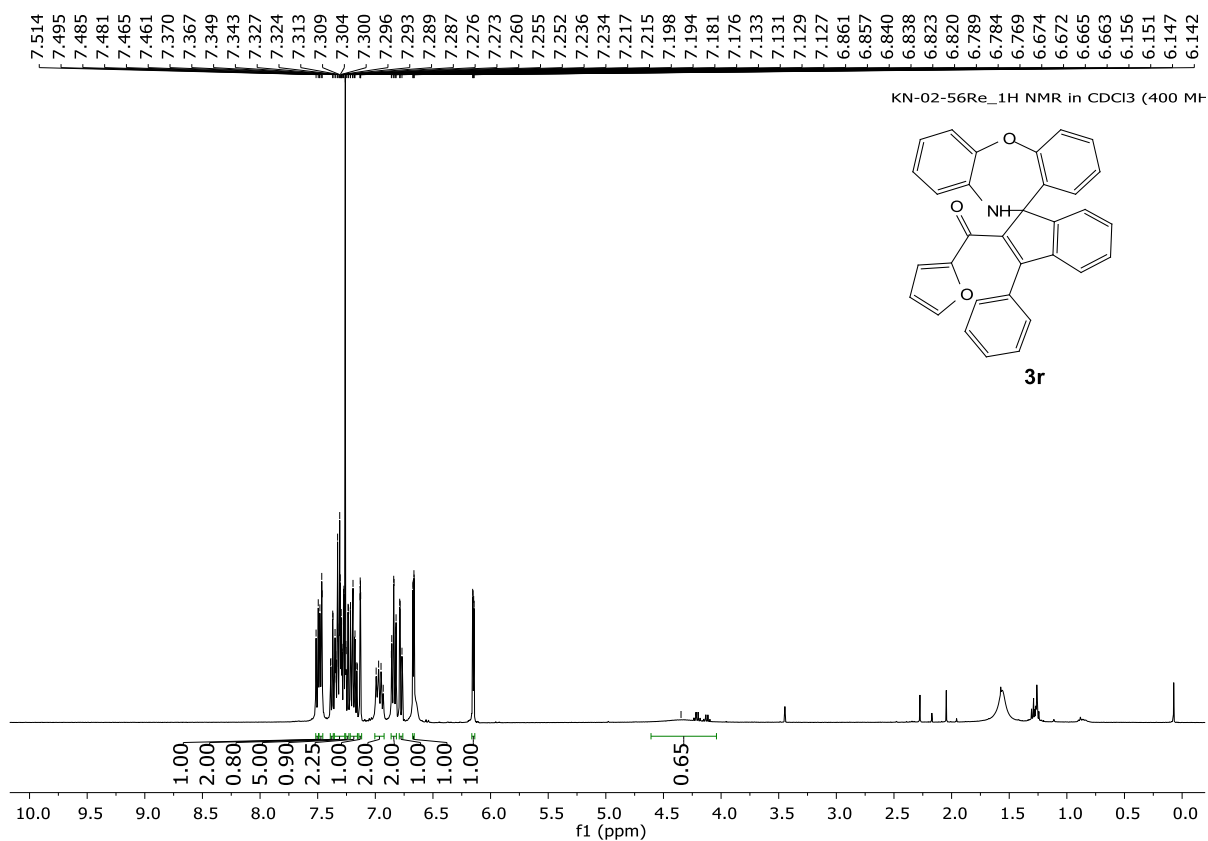

### <sup>13</sup>C NMR of 3r (100 MHz, CDCl<sub>3</sub>):

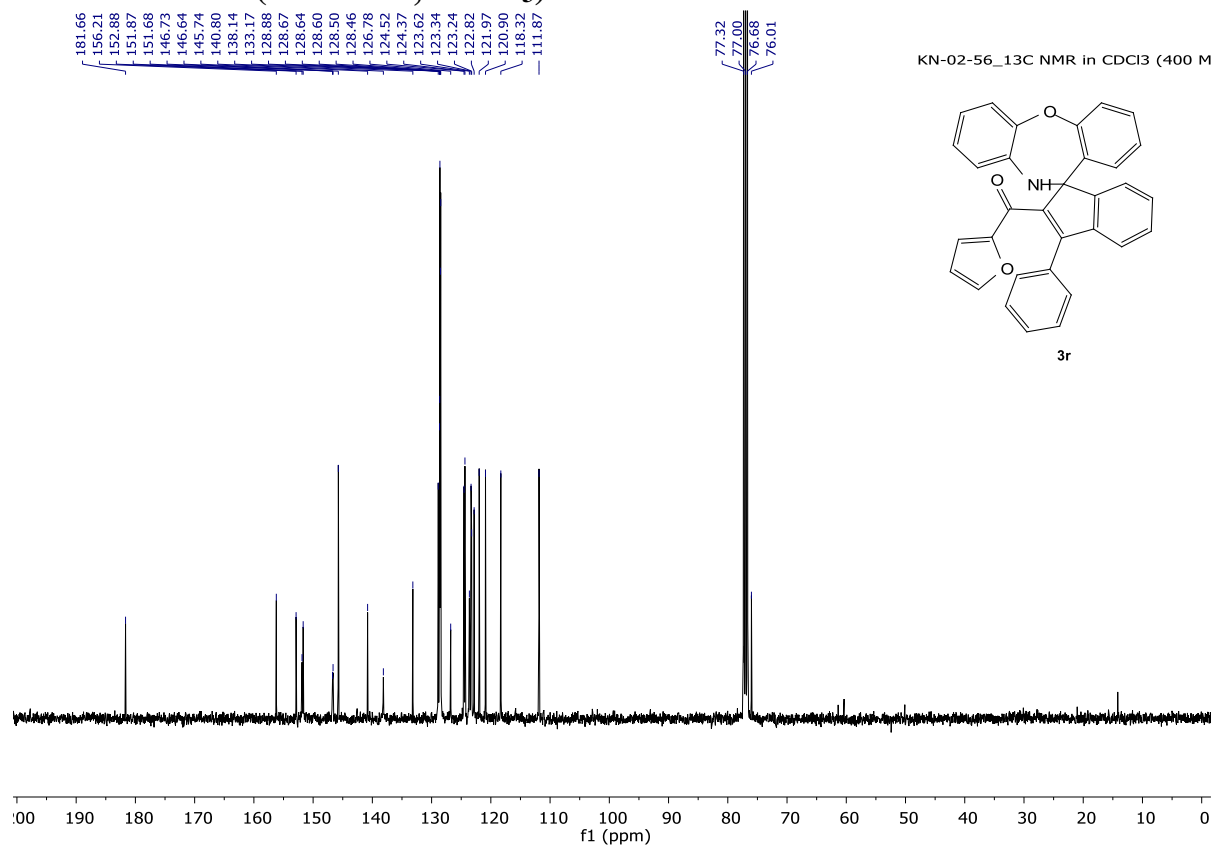

### <sup>1</sup>H NMR of 3s (400 MHz, CDCl<sub>3</sub>):

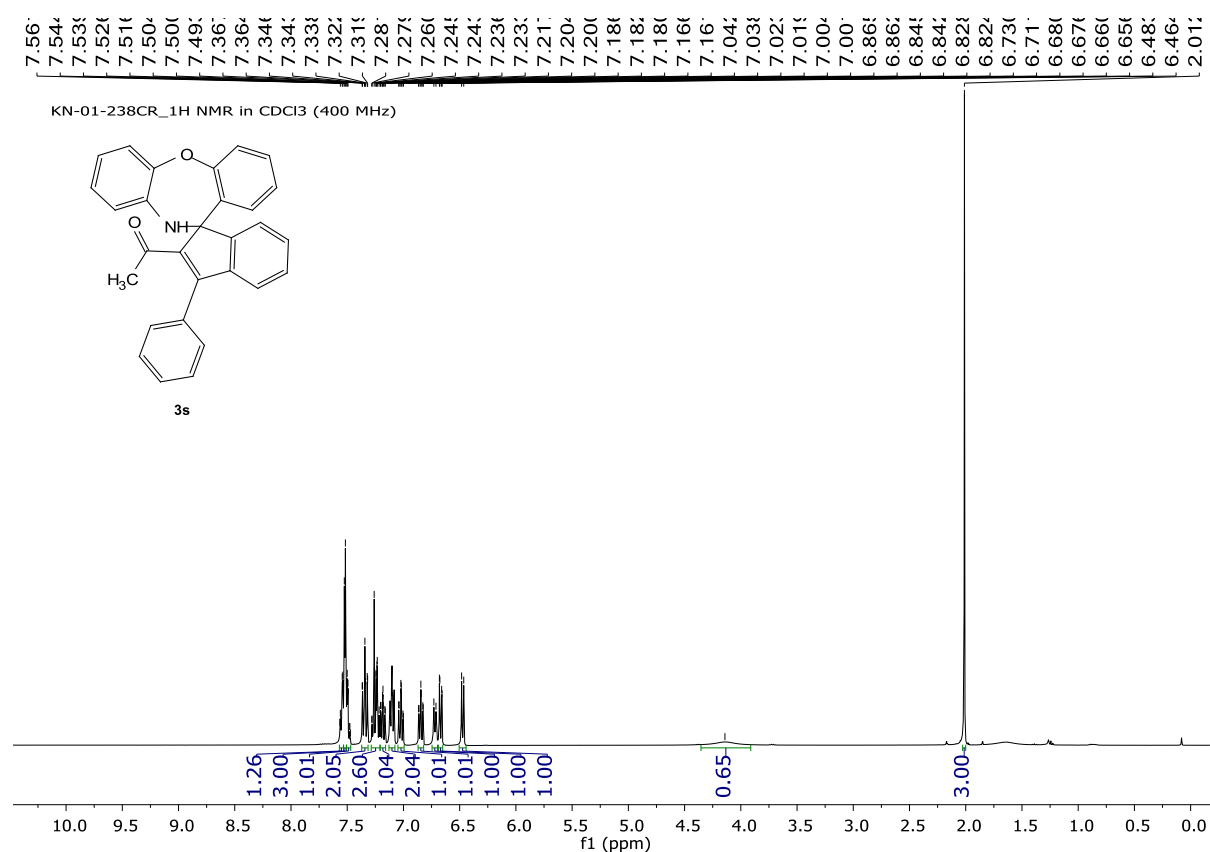

### <sup>13</sup>C NMR of 3s (100 MHz, CDCl<sub>3</sub>):

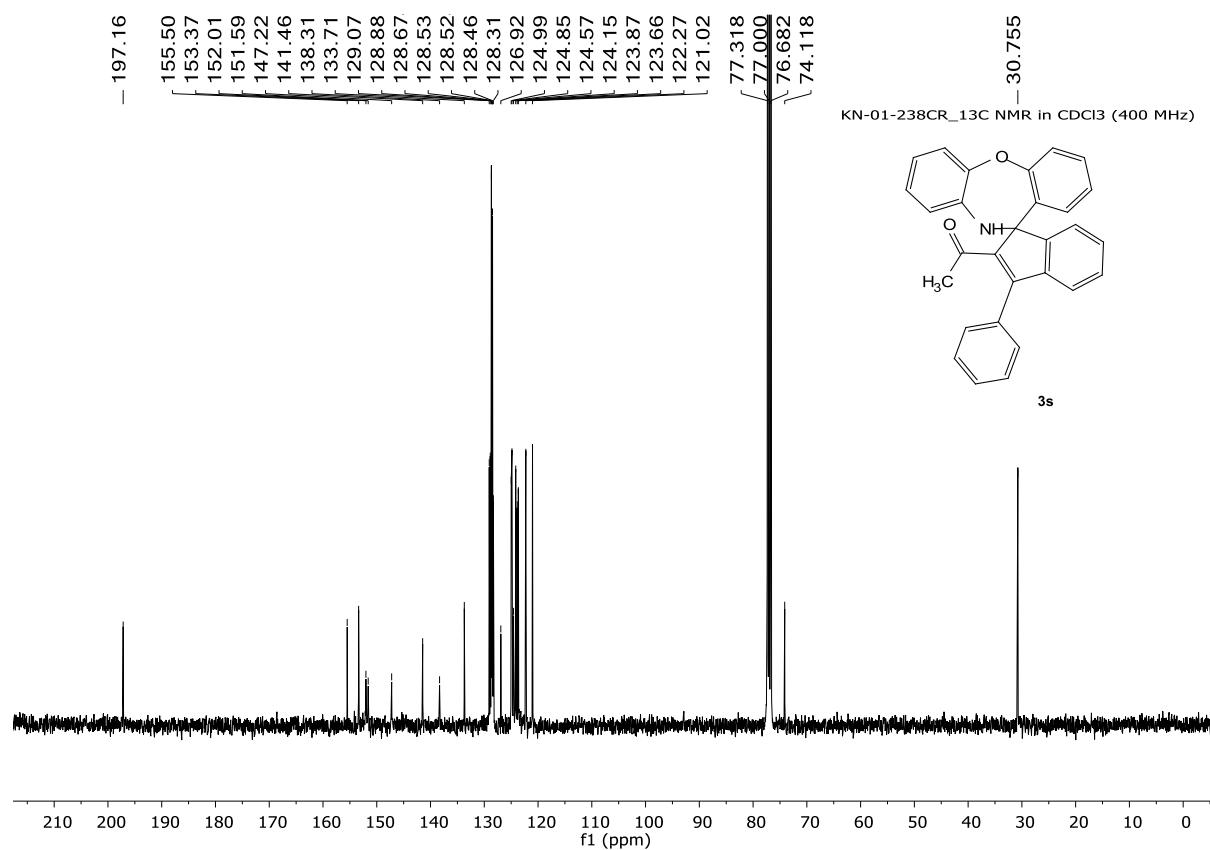

### <sup>1</sup>H NMR of 3t (400 MHz, CDCl<sub>3</sub>):

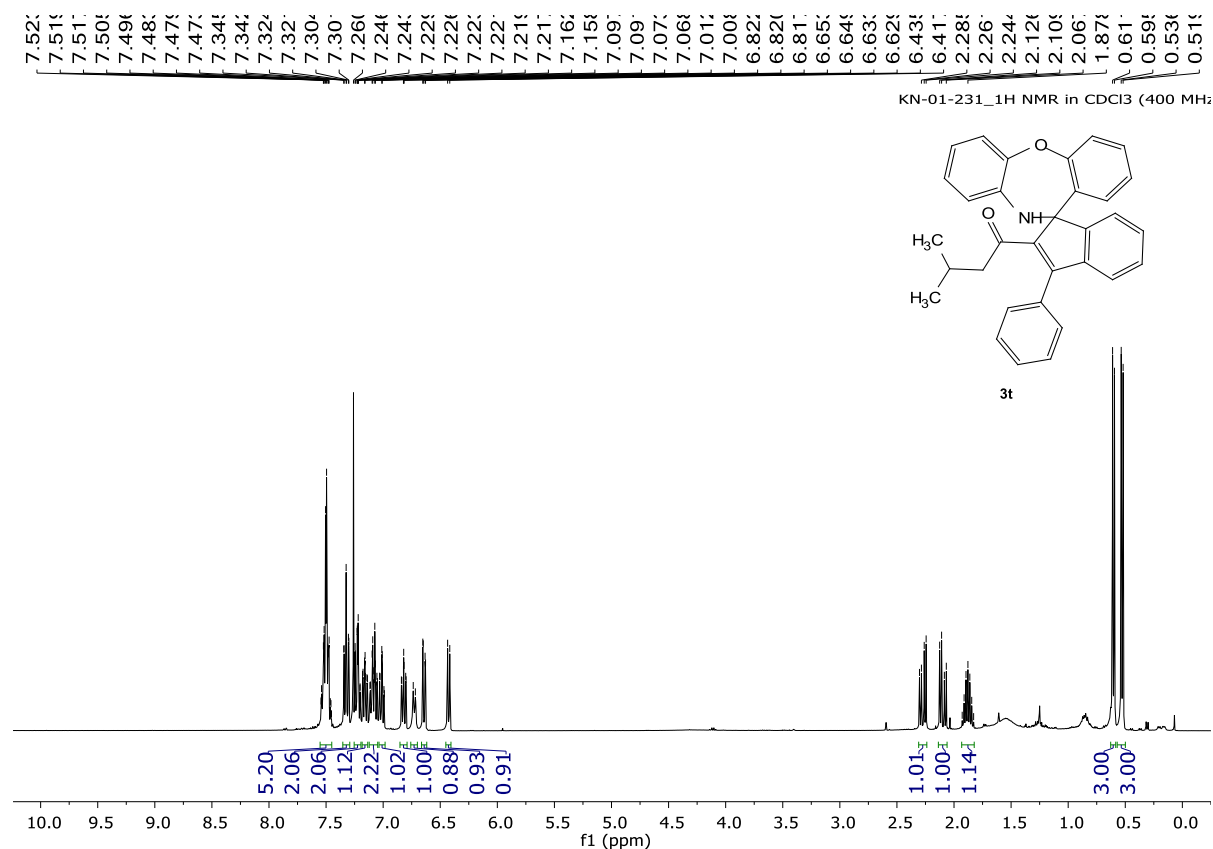

### <sup>13</sup>C NMR of 3t (100 MHz, CDCl<sub>3</sub>):

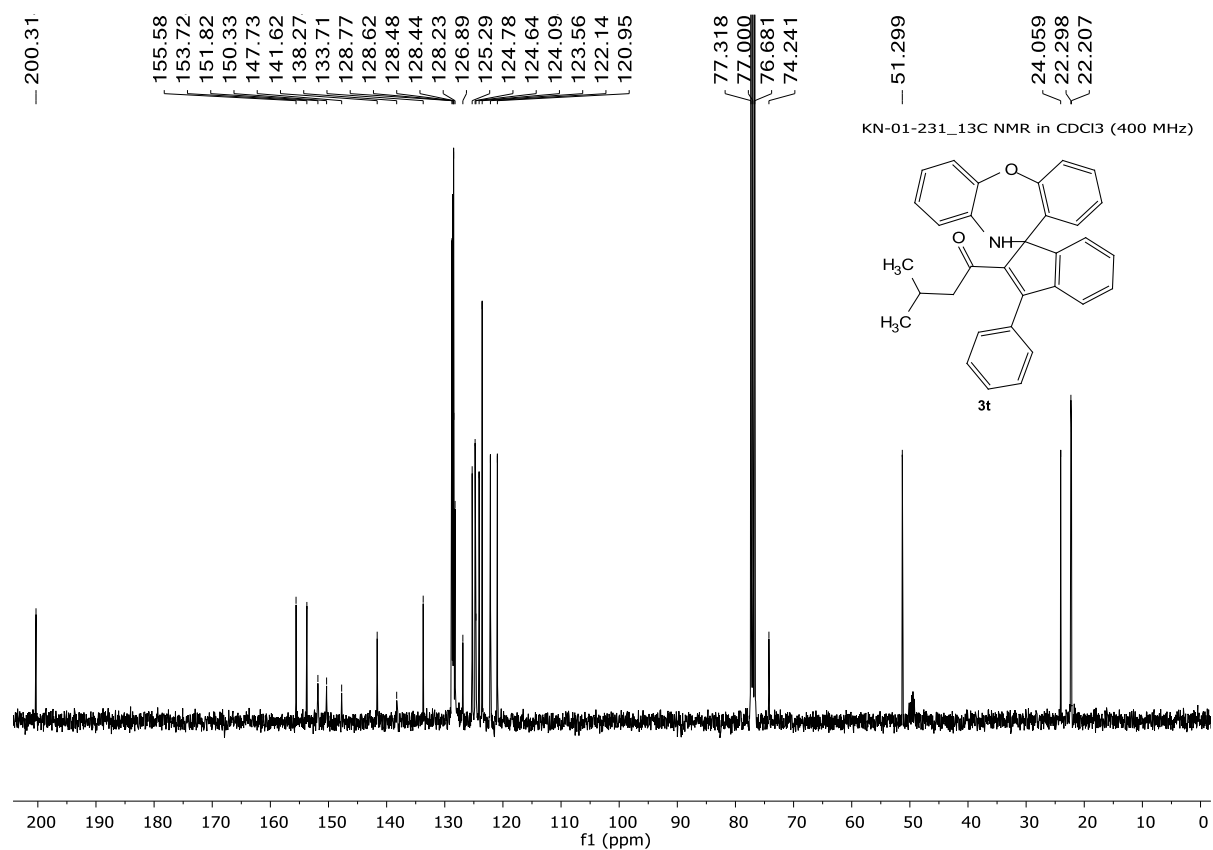



### <sup>1</sup>H NMR of 3u (400 MHz, CDCl<sub>3</sub>):

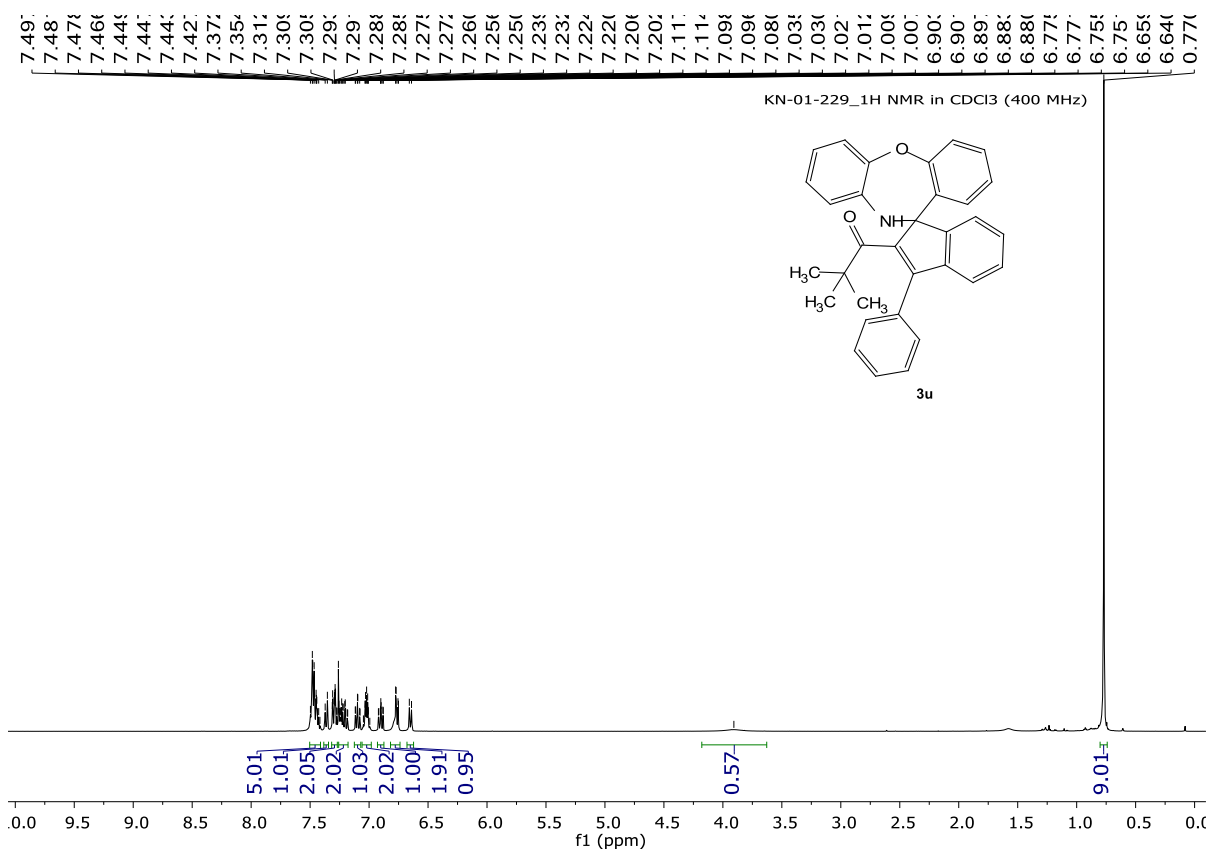

### <sup>13</sup>C NMR of 3u (100 MHz, CDCl<sub>3</sub>):

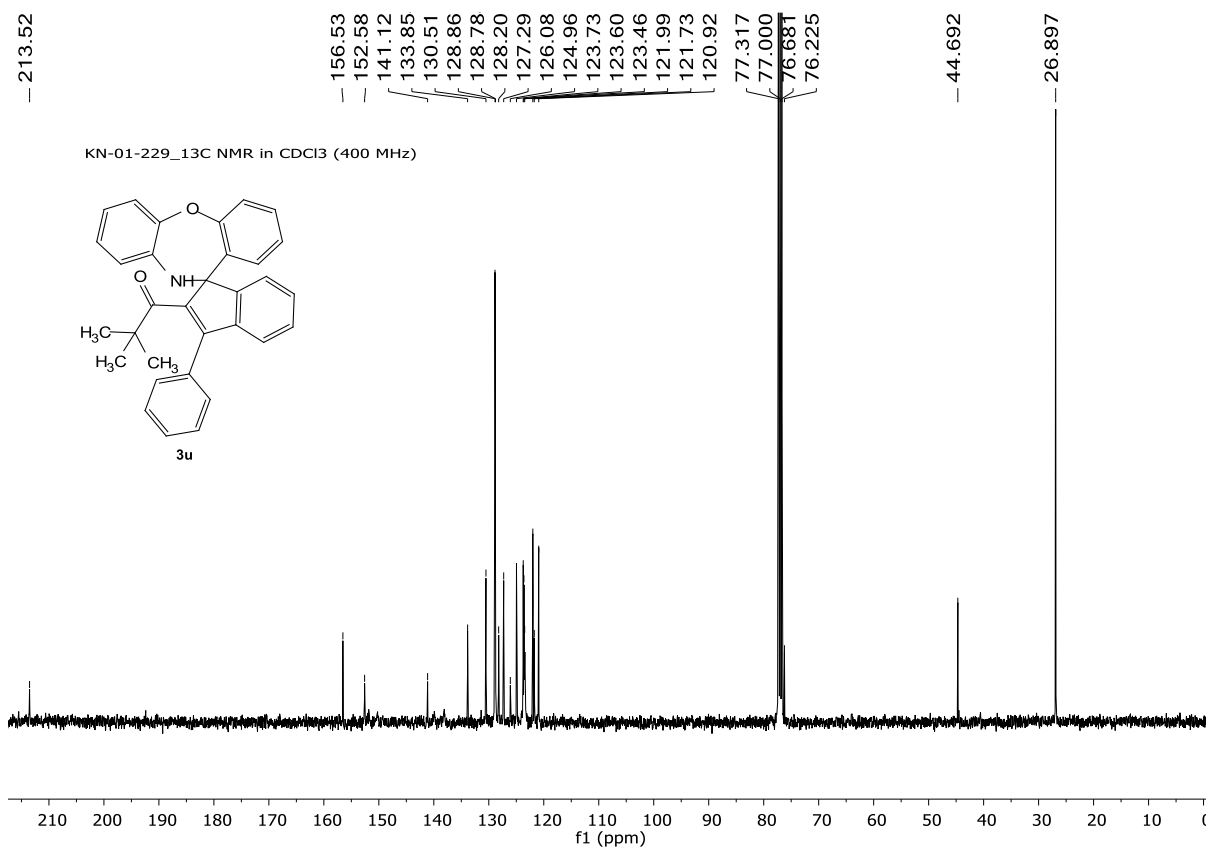

### <sup>1</sup>H NMR of 3v (400 MHz, CDCl<sub>3</sub>):

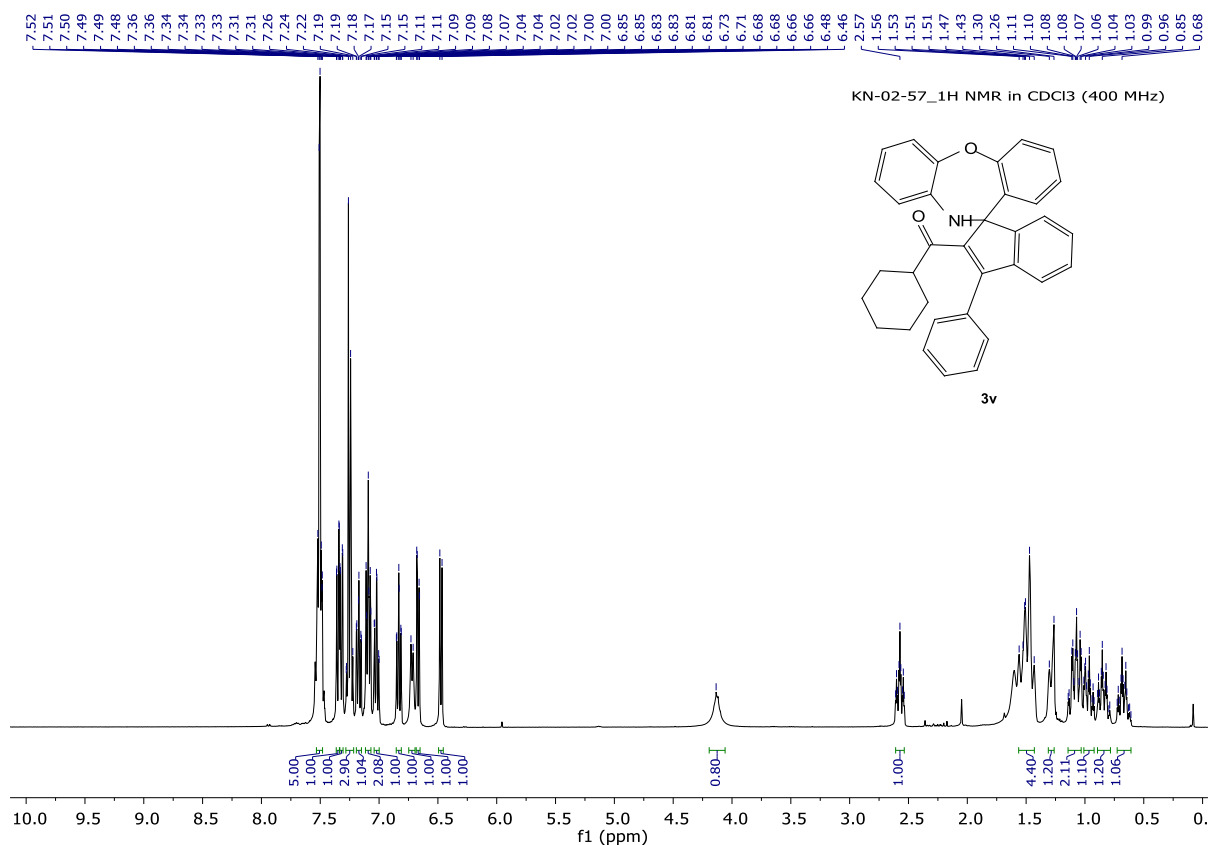

### <sup>13</sup>C NMR of 3v (100 MHz, CDCl<sub>3</sub>):

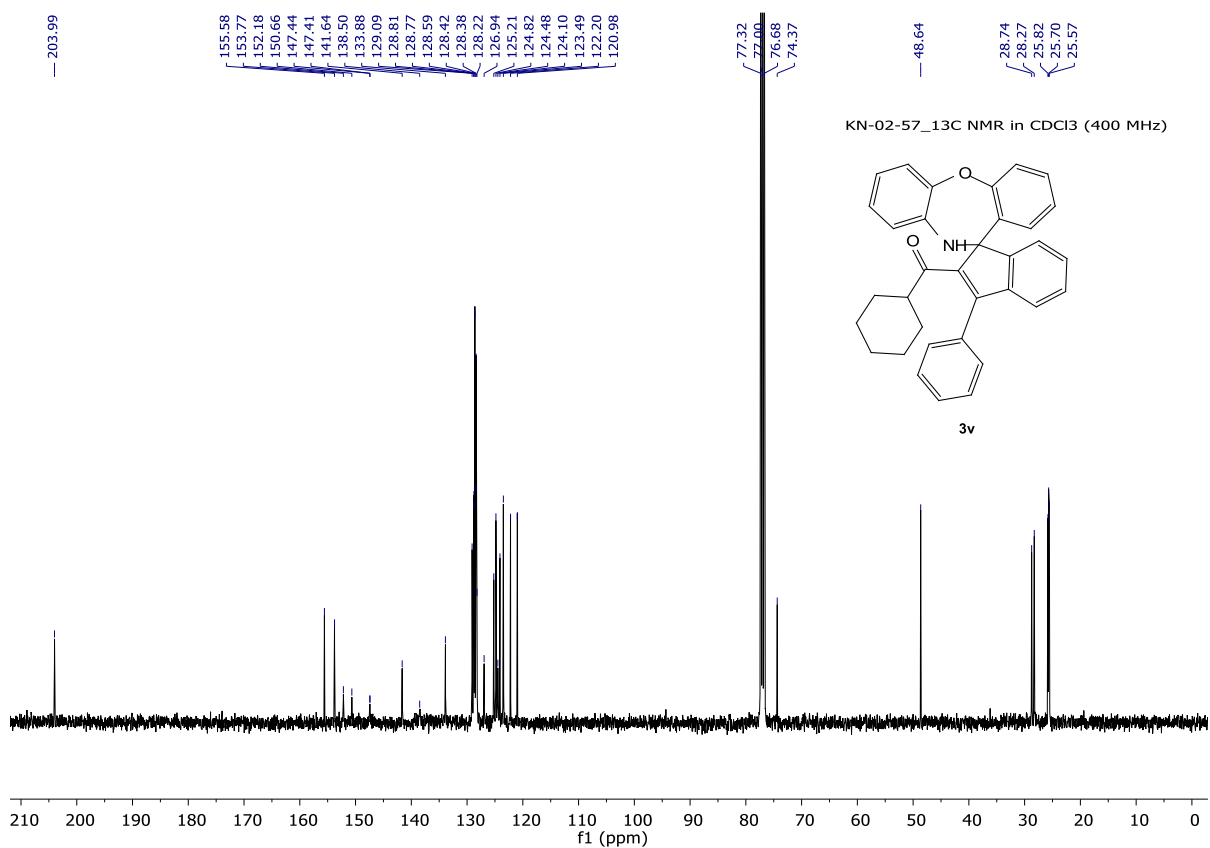

### <sup>1</sup>H NMR of 3w (400 MHz, CDCl<sub>3</sub>):

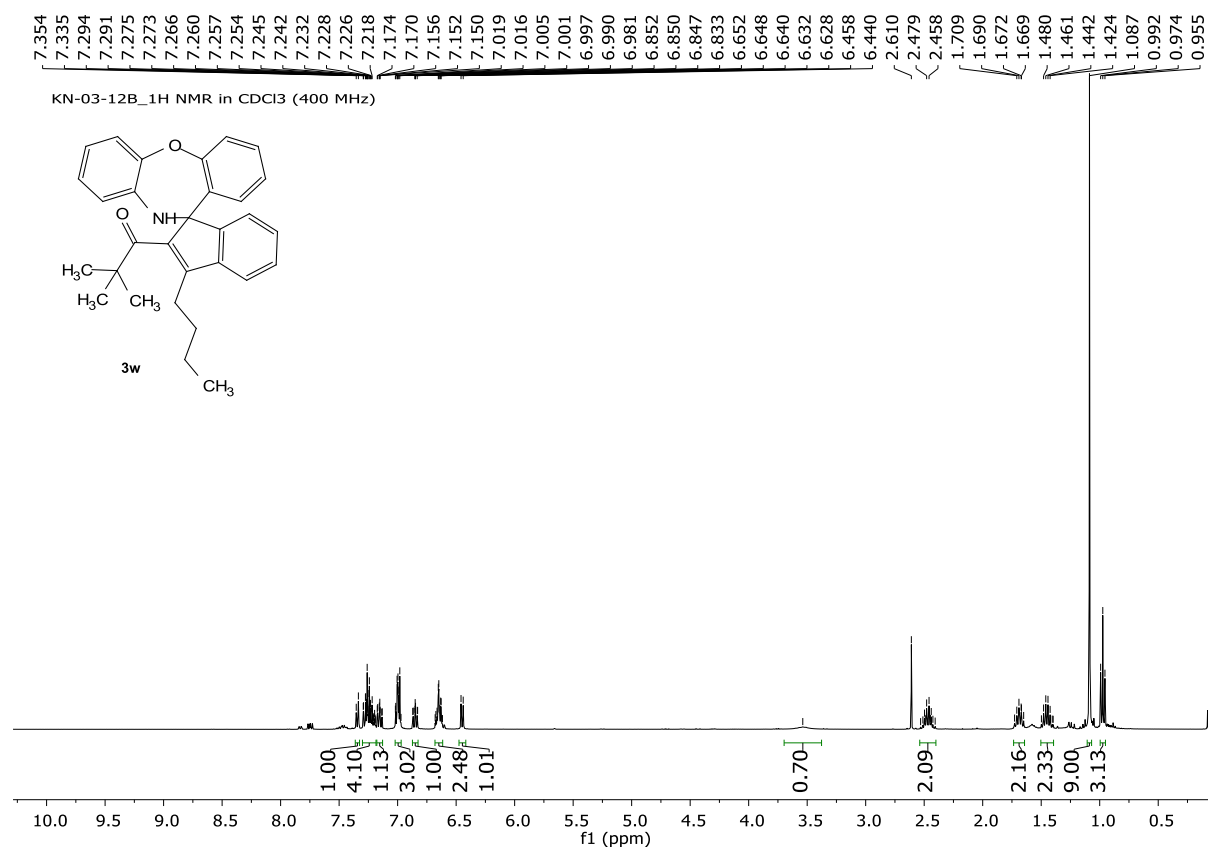

### <sup>13</sup>C NMR of 3w (100 MHz, CDCl<sub>3</sub>):

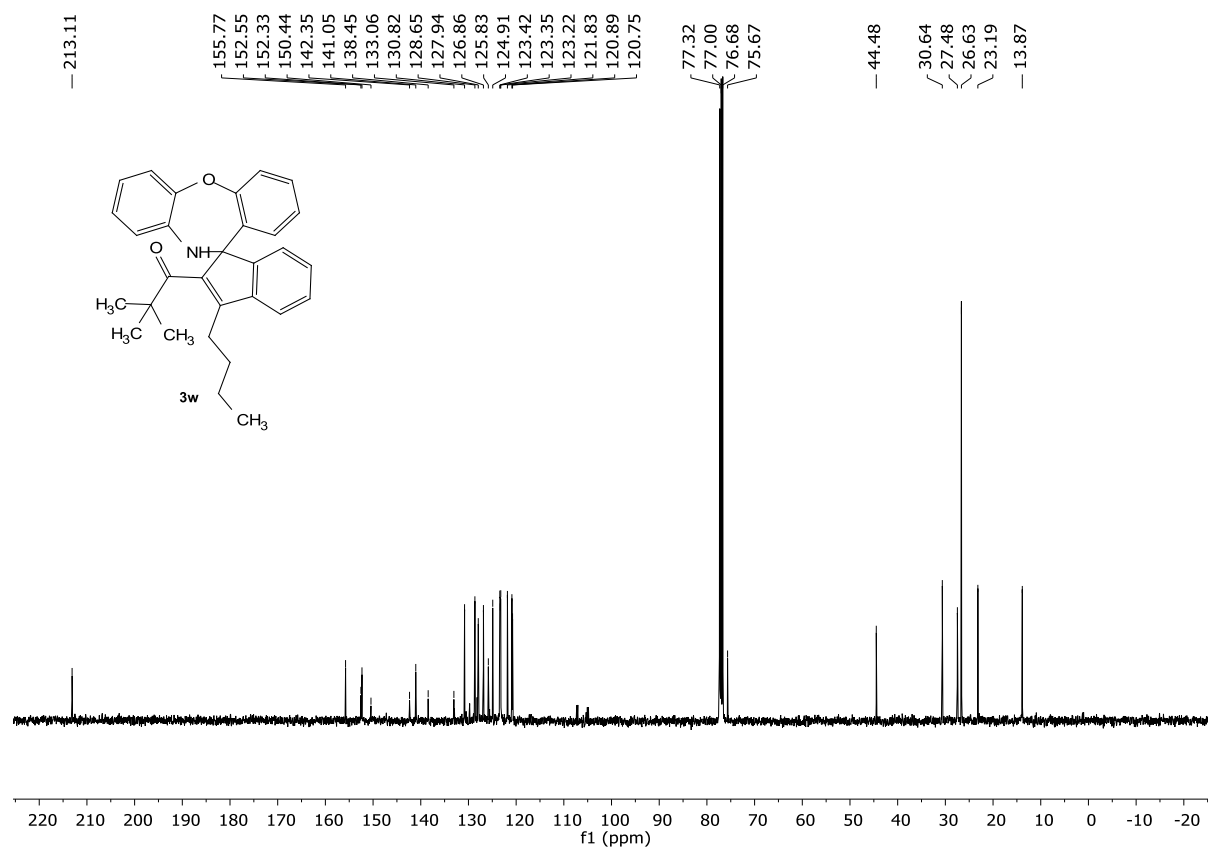

### <sup>1</sup>H NMR of 3x (400 MHz, CDCl<sub>3</sub>):

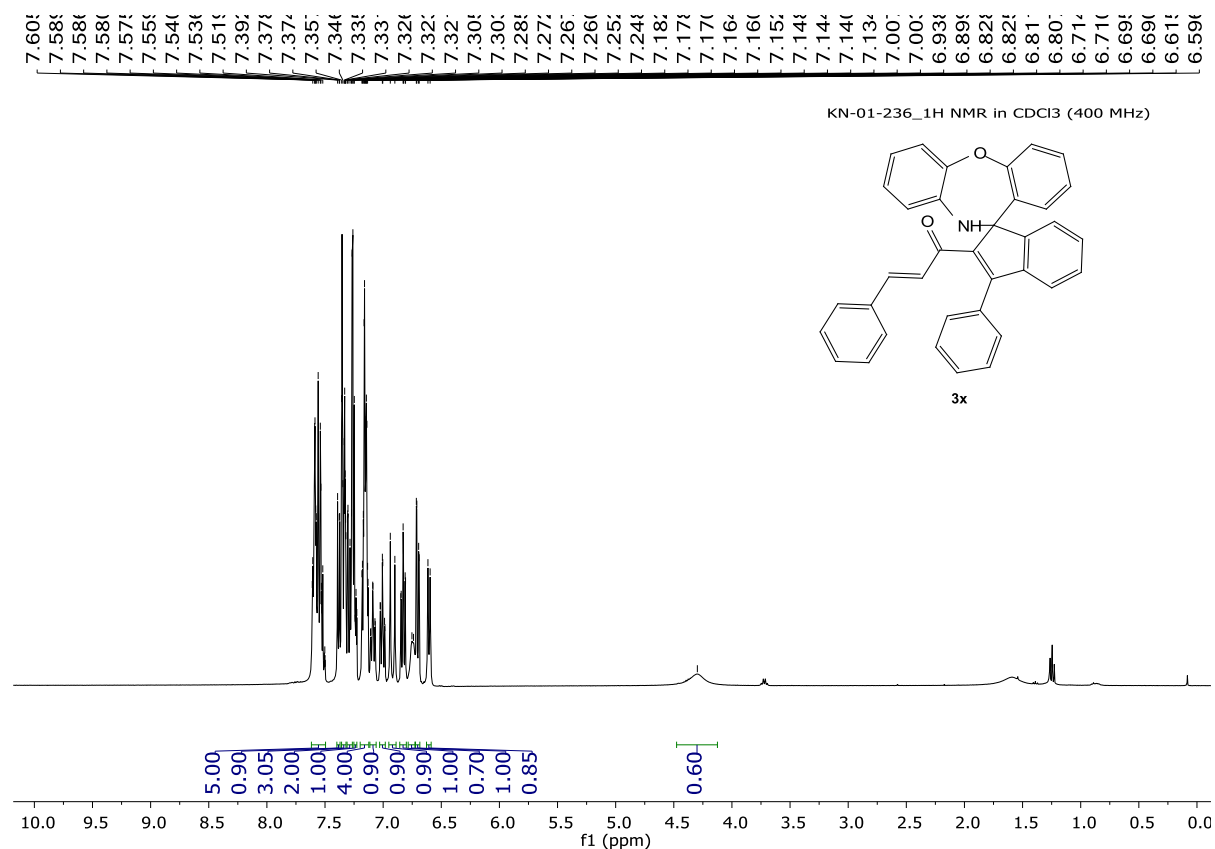

### <sup>13</sup>C NMR of 3x (100 MHz, CDCl<sub>3</sub>):

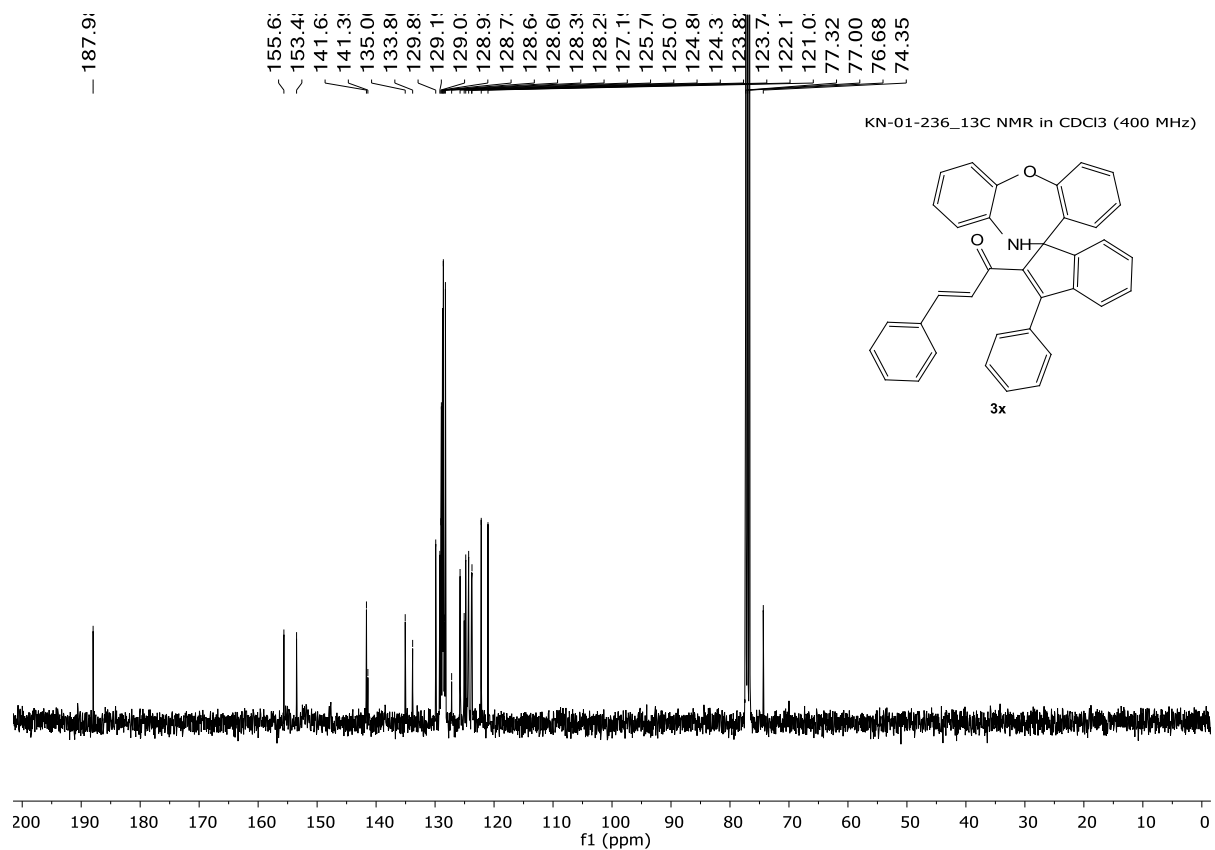

### <sup>1</sup>H NMR of 3y (400 MHz, CDCl<sub>3</sub>):

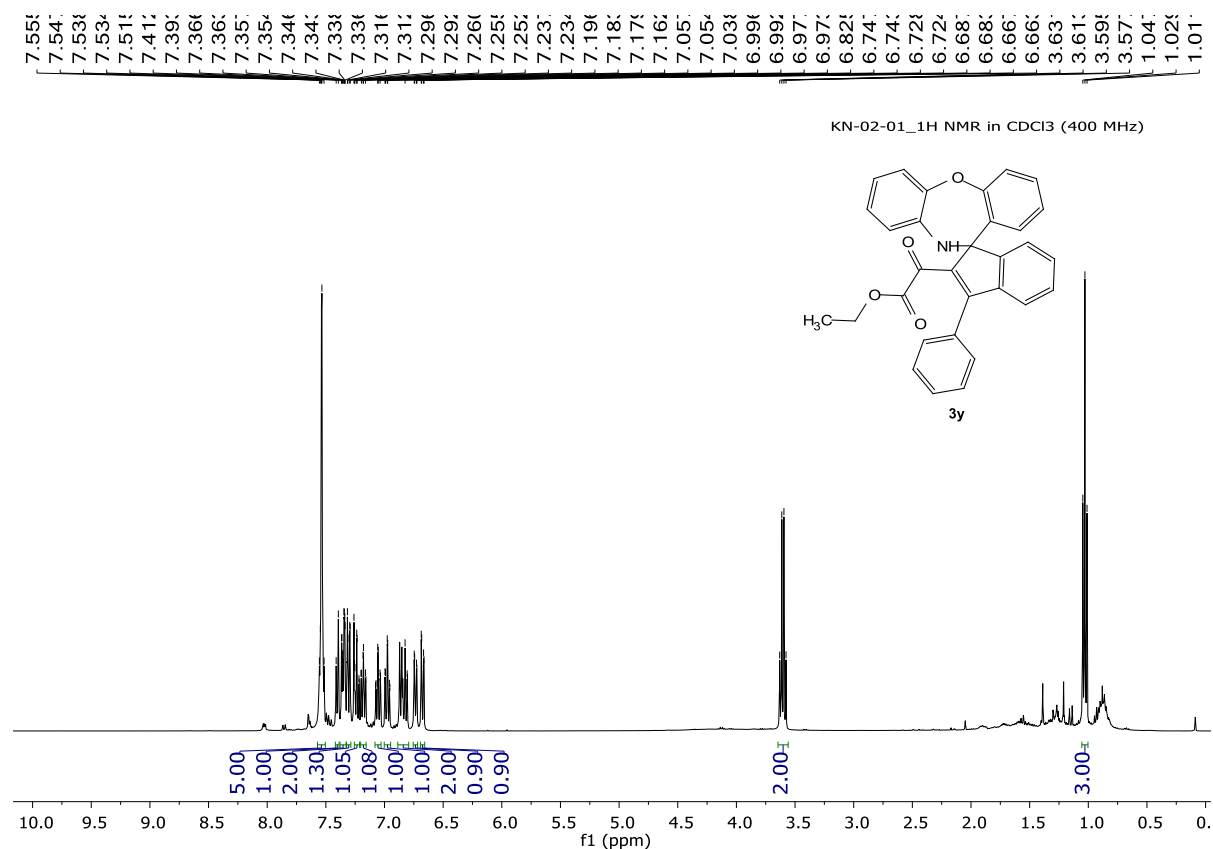

### <sup>13</sup>C NMR of 3y (100 MHz, CDCl<sub>3</sub>):

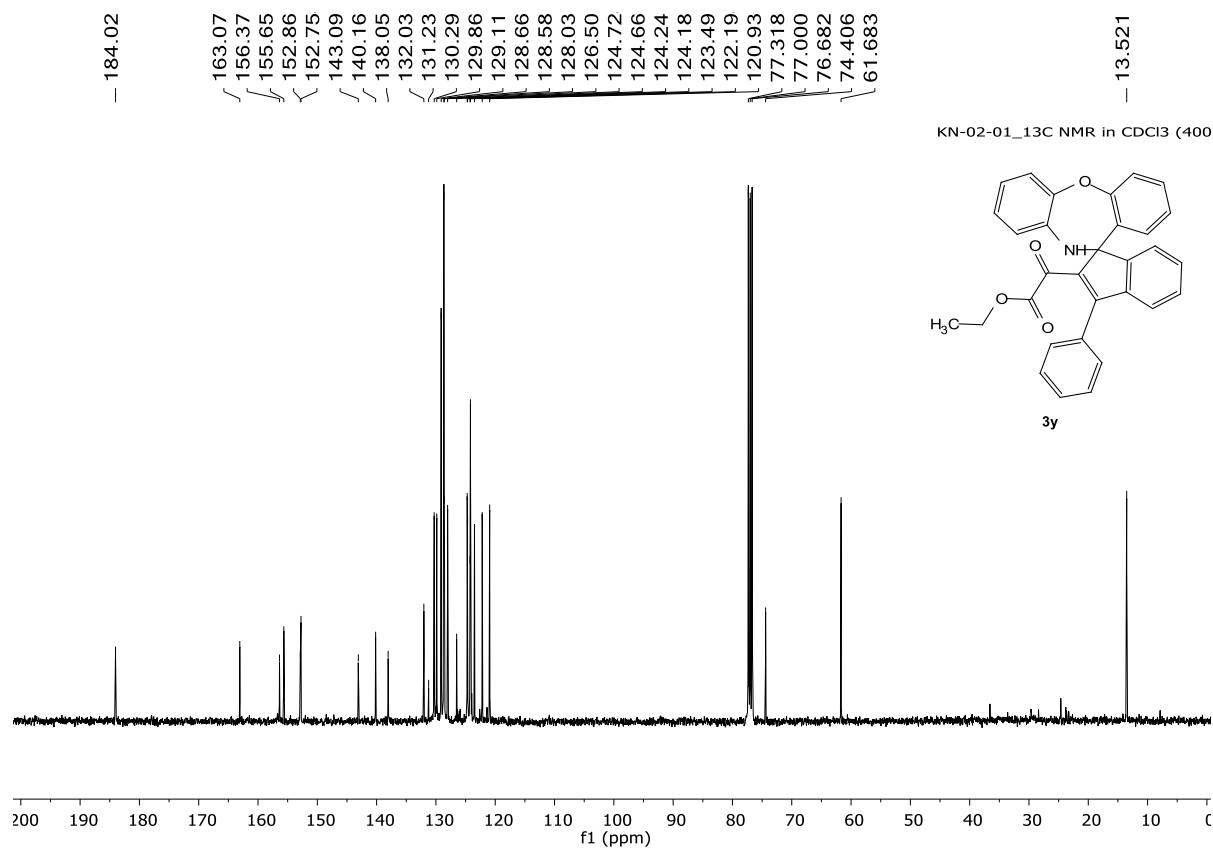

### <sup>1</sup>H NMR of 3z (400 MHz, CDCl<sub>3</sub>):

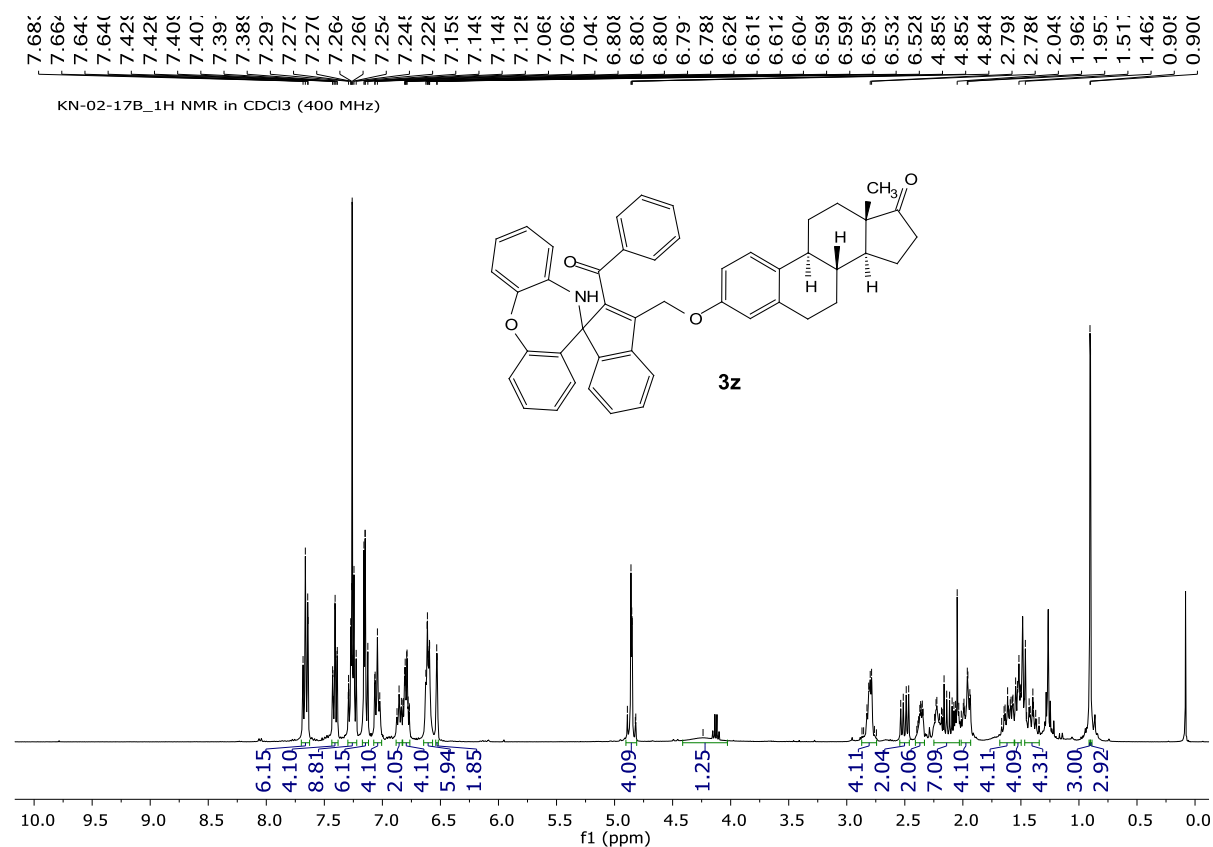

### <sup>13</sup>C NMR of 3z (100 MHz, CDCl<sub>3</sub>):

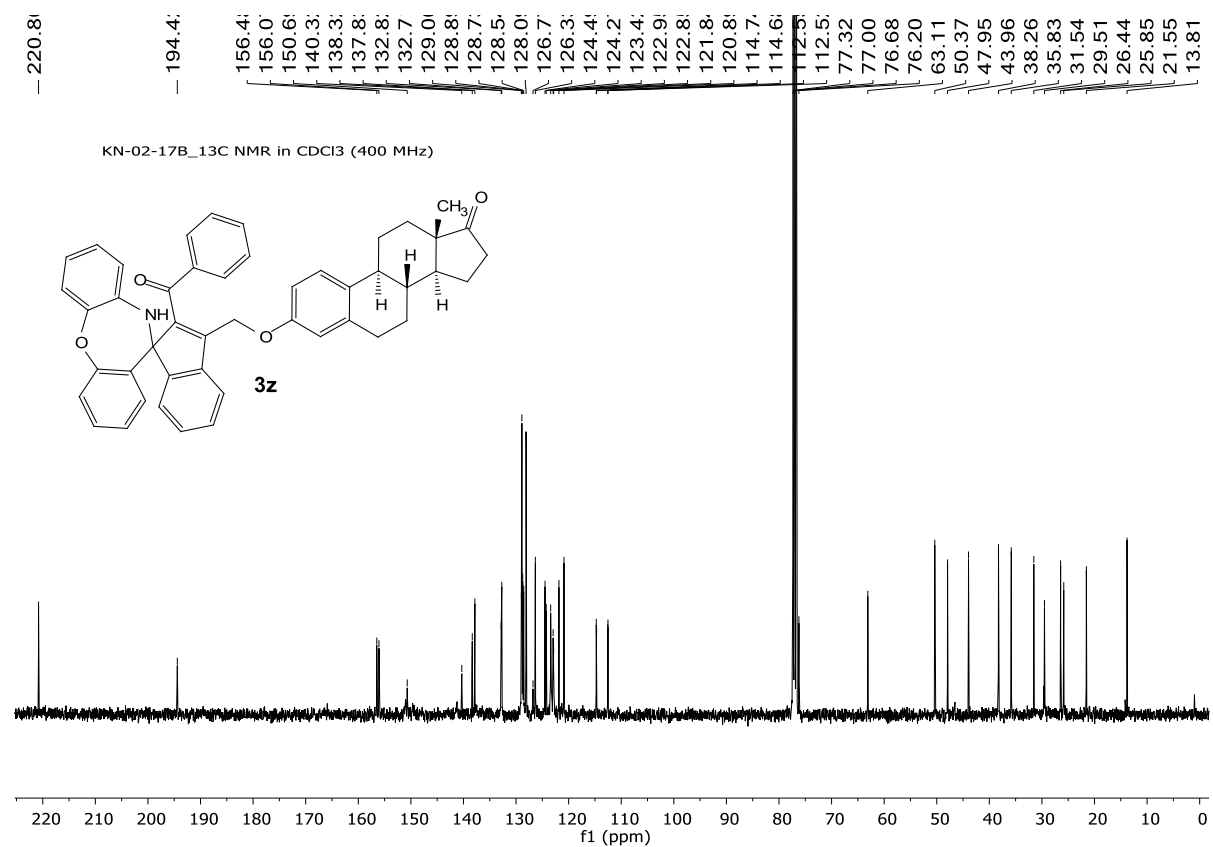

### <sup>1</sup>H NMR of 3a (400 MHz, CDCl<sub>3</sub>):

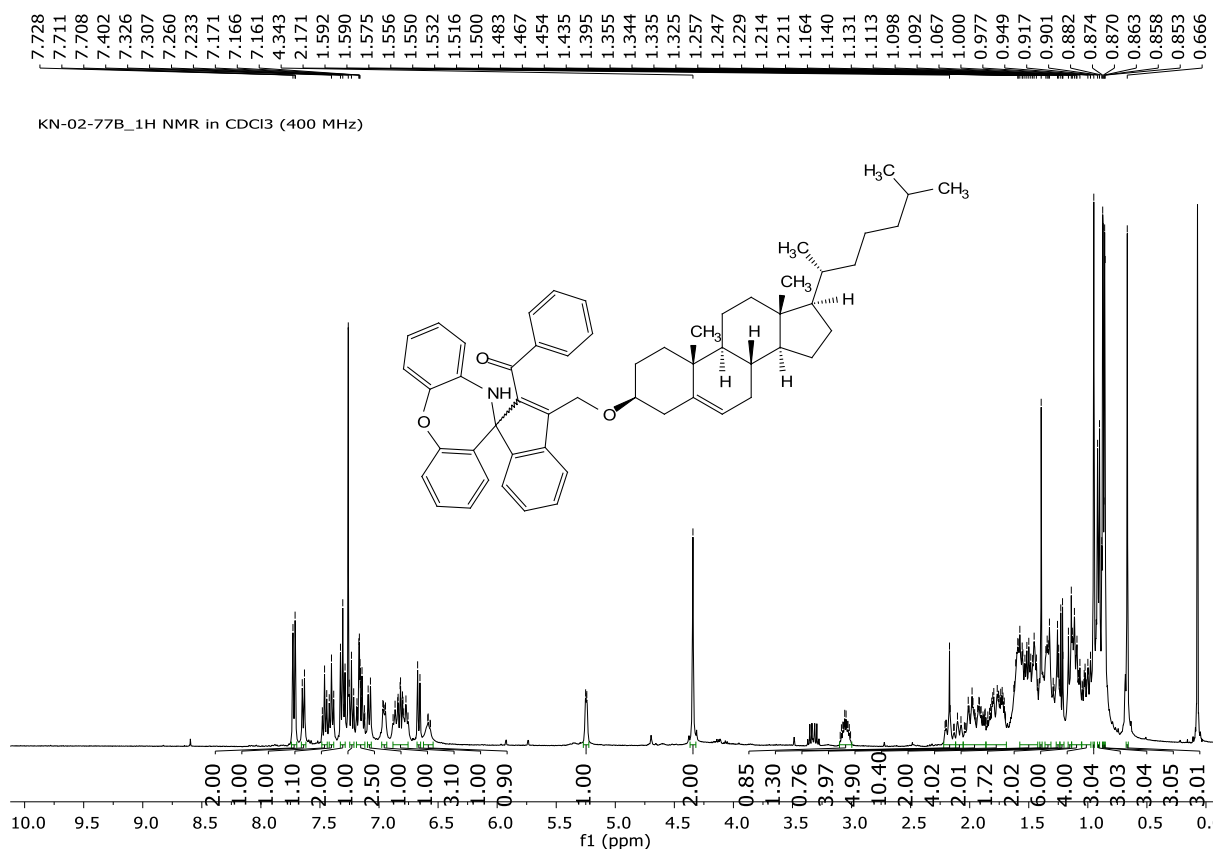

### <sup>13</sup>C NMR of 3a (100 MHz, CDCl<sub>3</sub>):

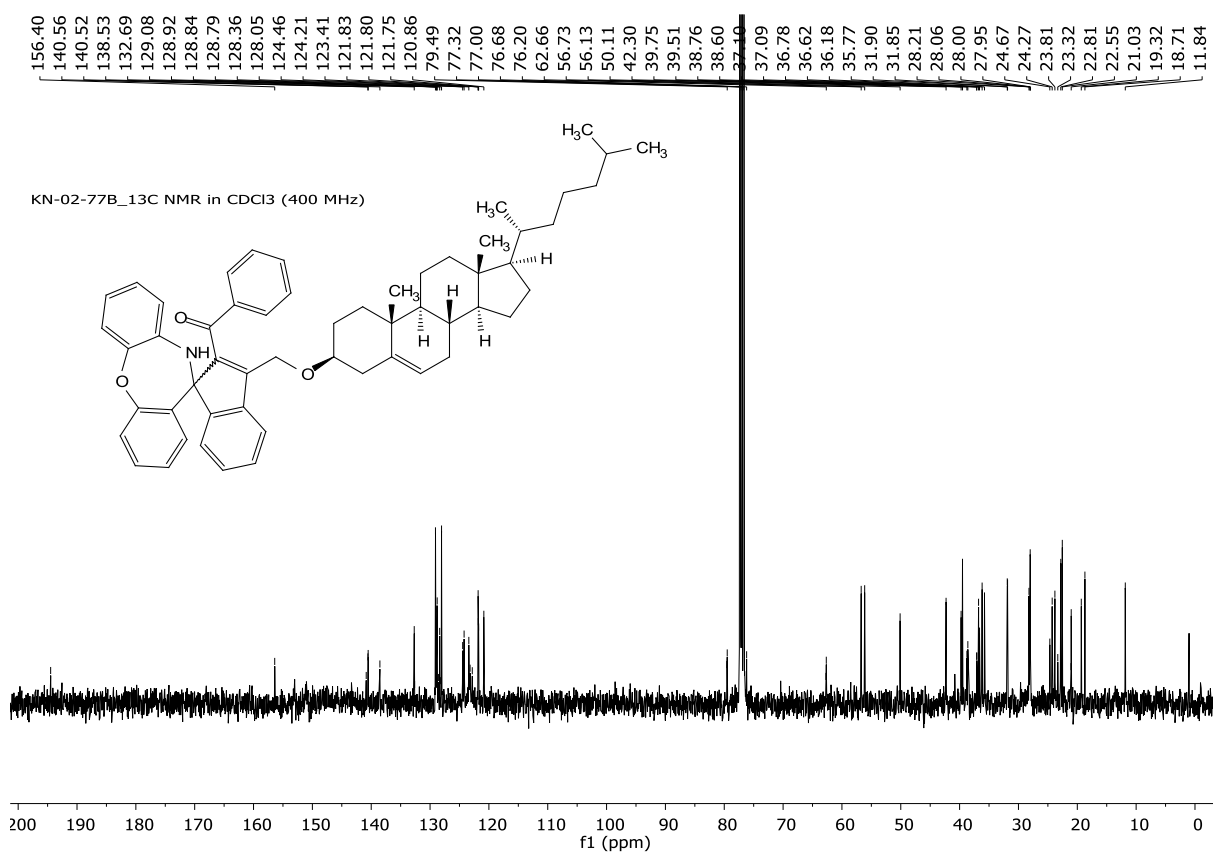

### <sup>1</sup>H NMR of 3za' (400 MHz, CDCl<sub>3</sub>):

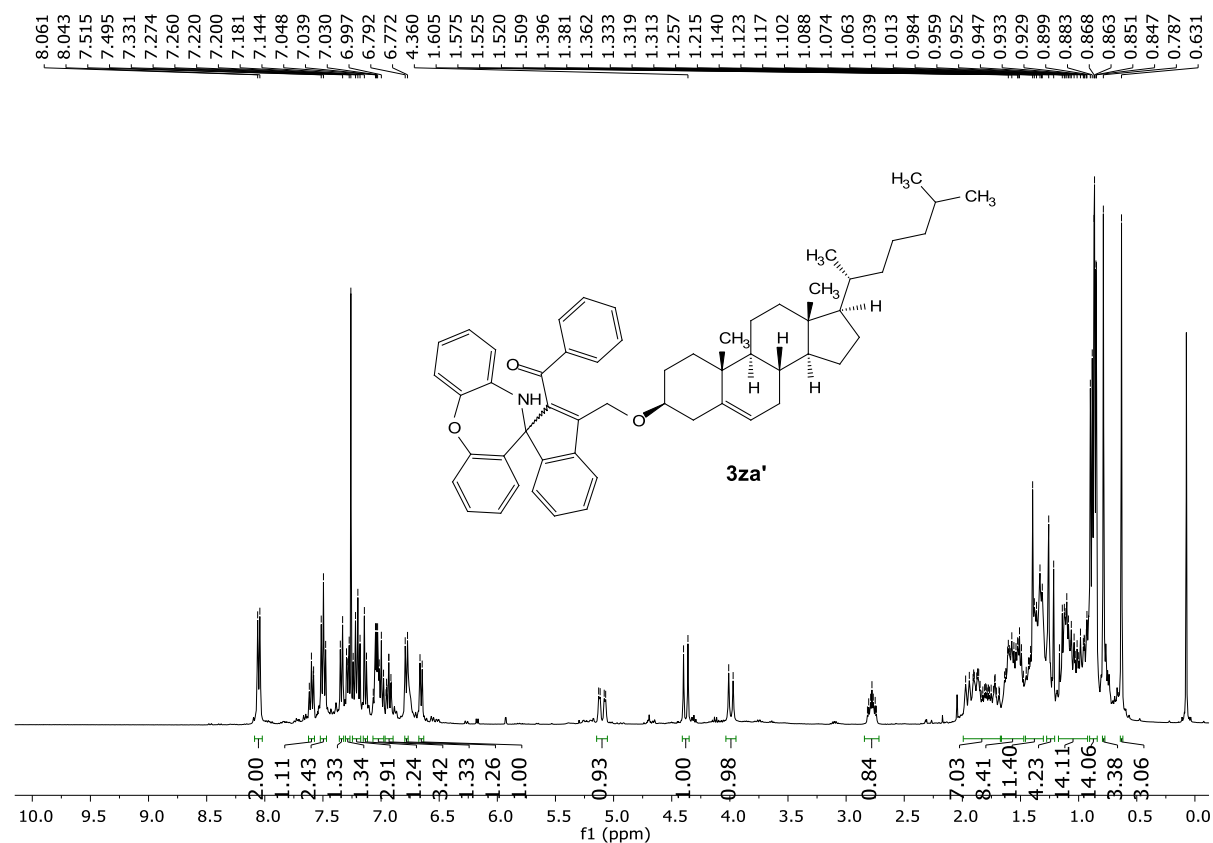

### <sup>13</sup>C NMR of 3za' (100 MHz, CDCl<sub>3</sub>):

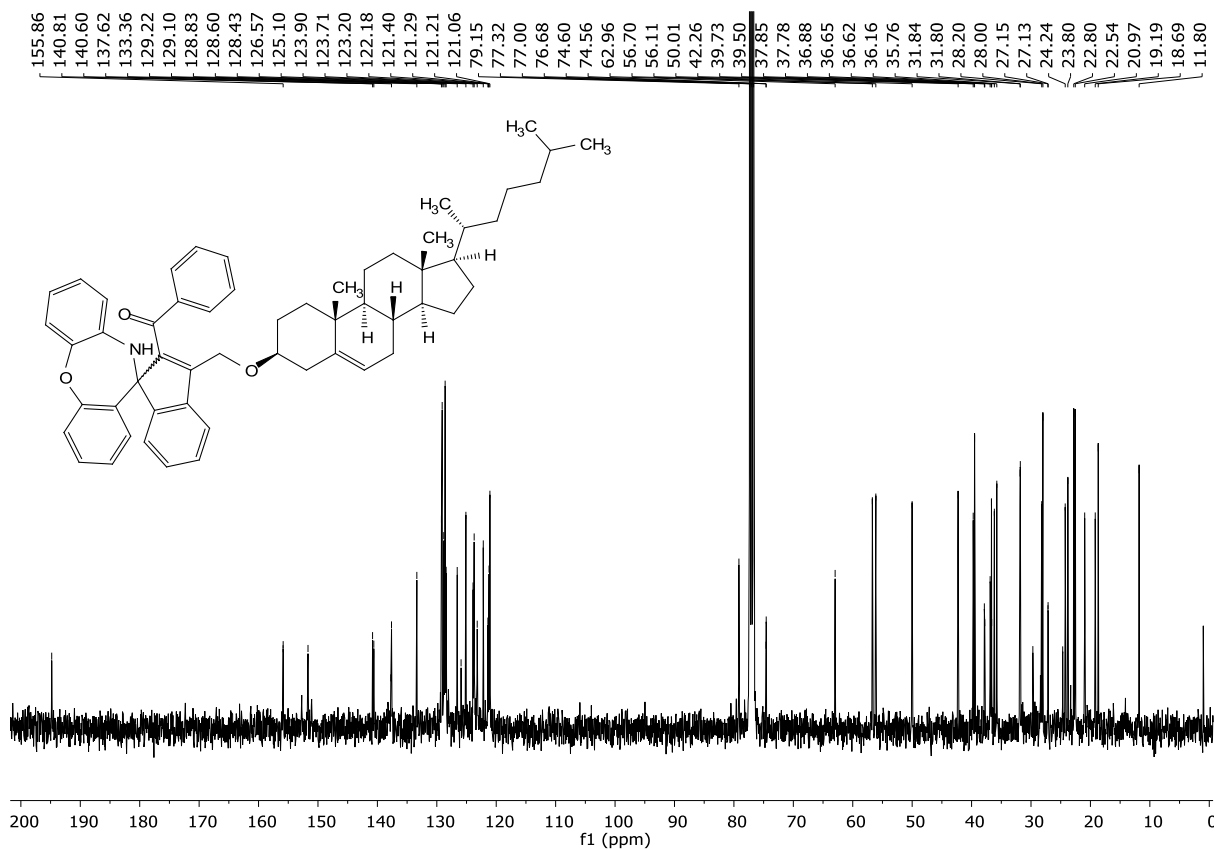



# <sup>1</sup>H NMR of 3zb (400 MHz, CDCl<sub>3</sub>):

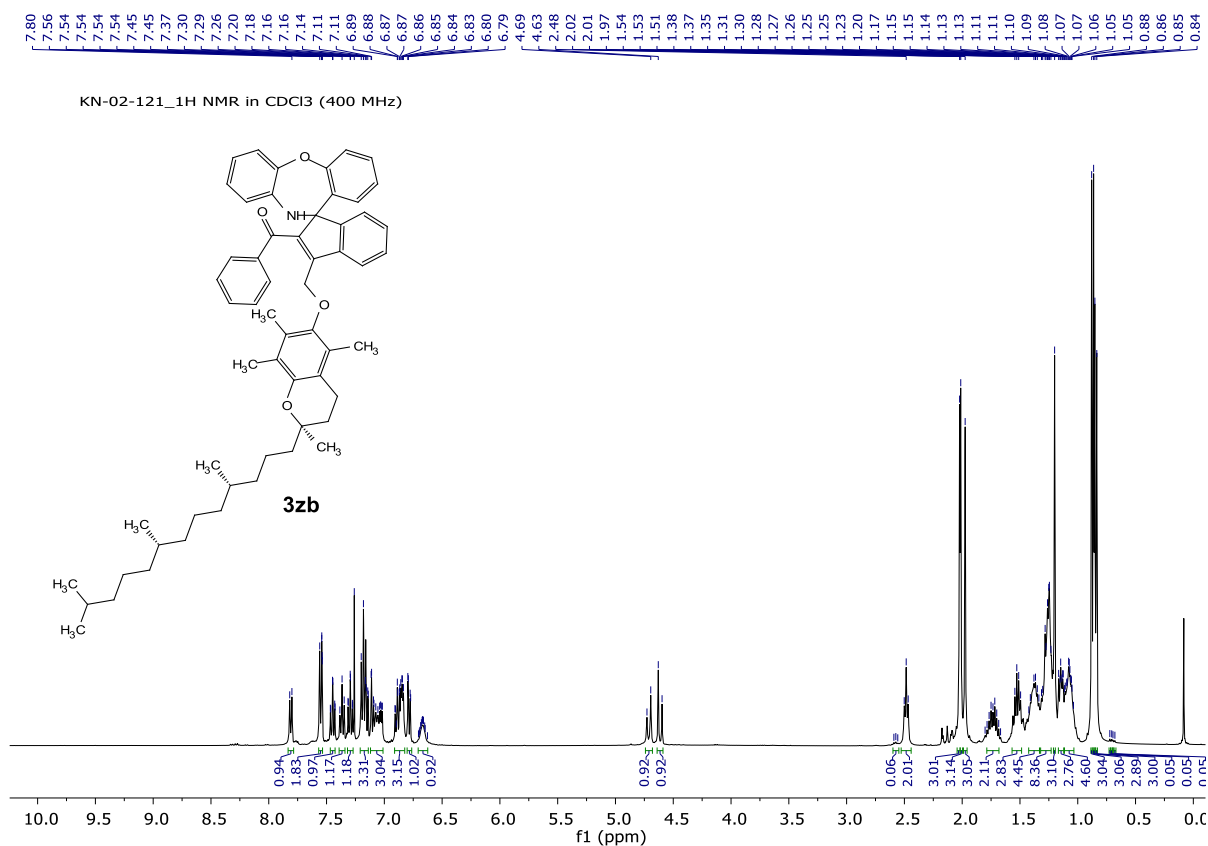

# <sup>13</sup>C NMR of 3zb (100 MHz, CDCl<sub>3</sub>):

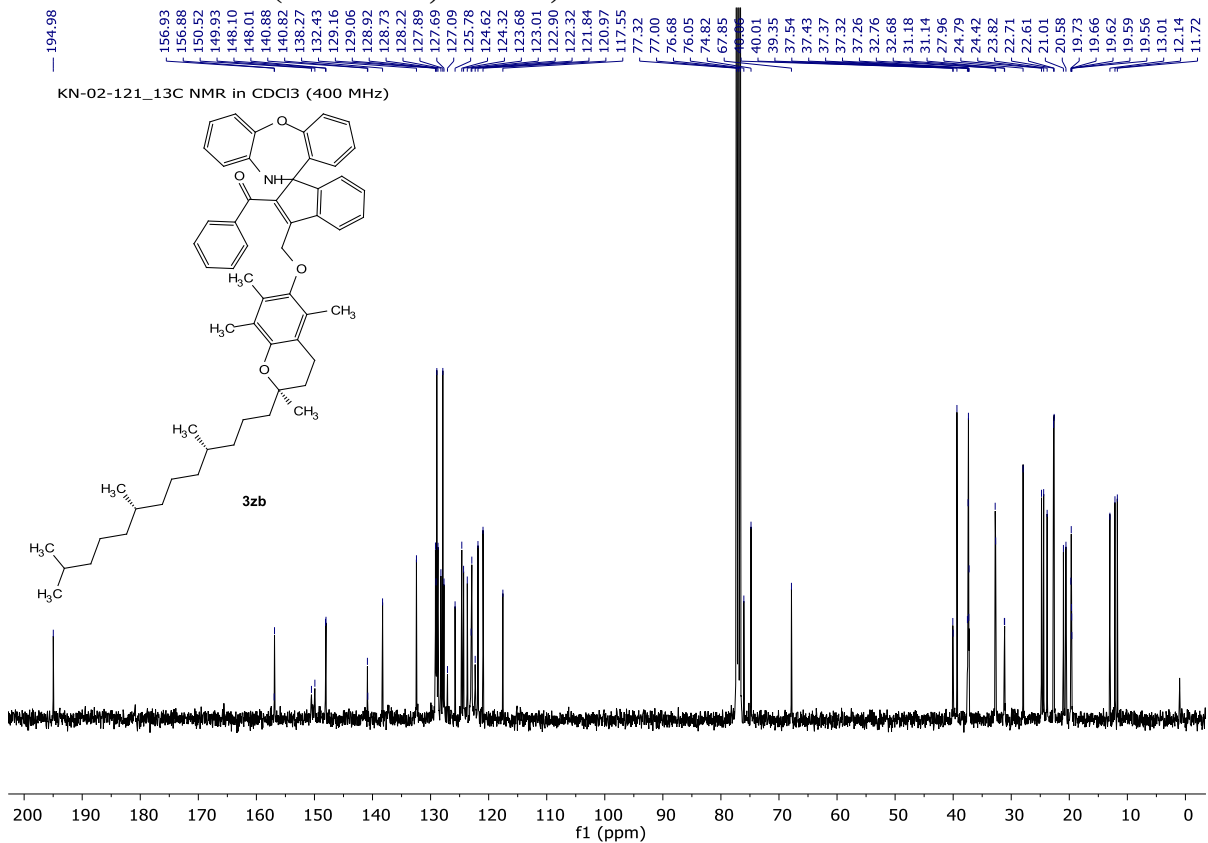

### <sup>1</sup>H NMR of 4a (400 MHz, CDCl<sub>3</sub>):

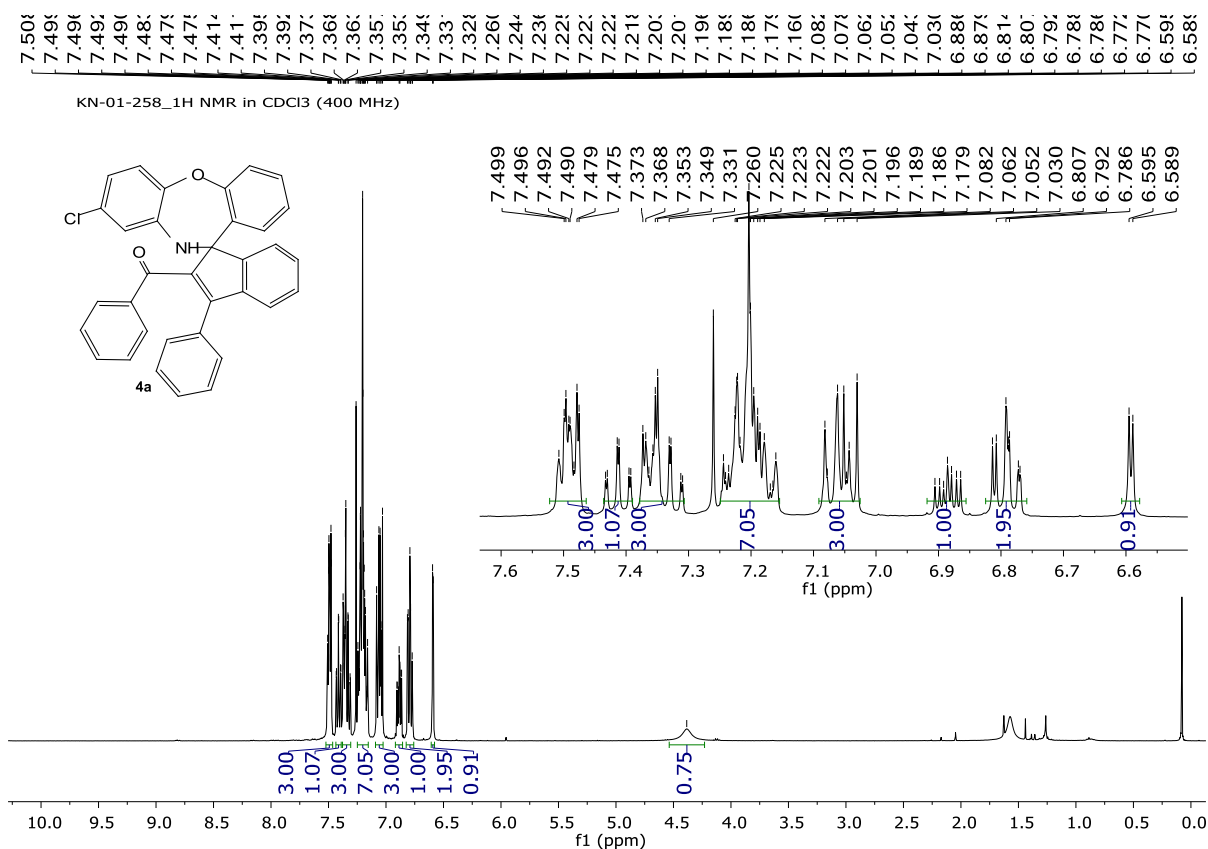

### <sup>13</sup>C NMR of 4a (100 MHz, CDCl<sub>3</sub>):

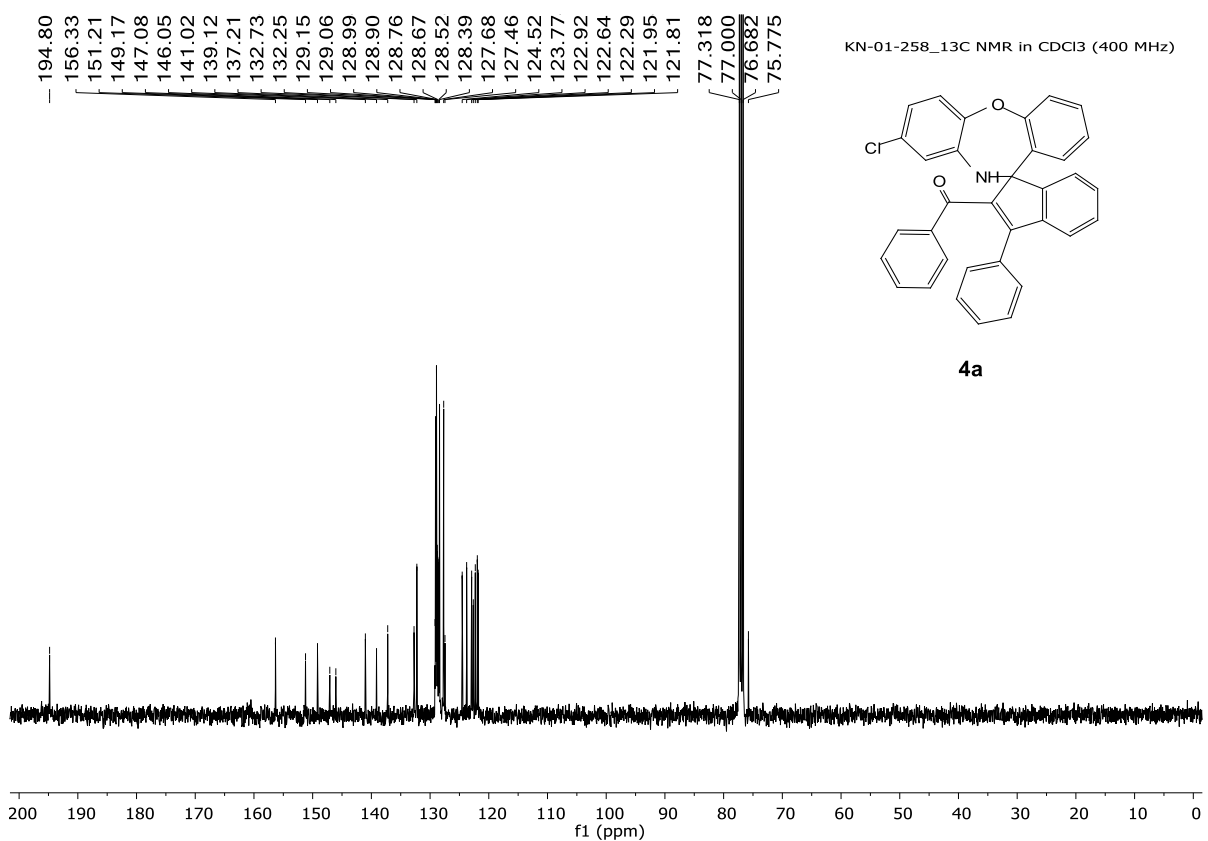

### <sup>1</sup>H NMR of 4b (400 MHz, CDCl<sub>3</sub>):

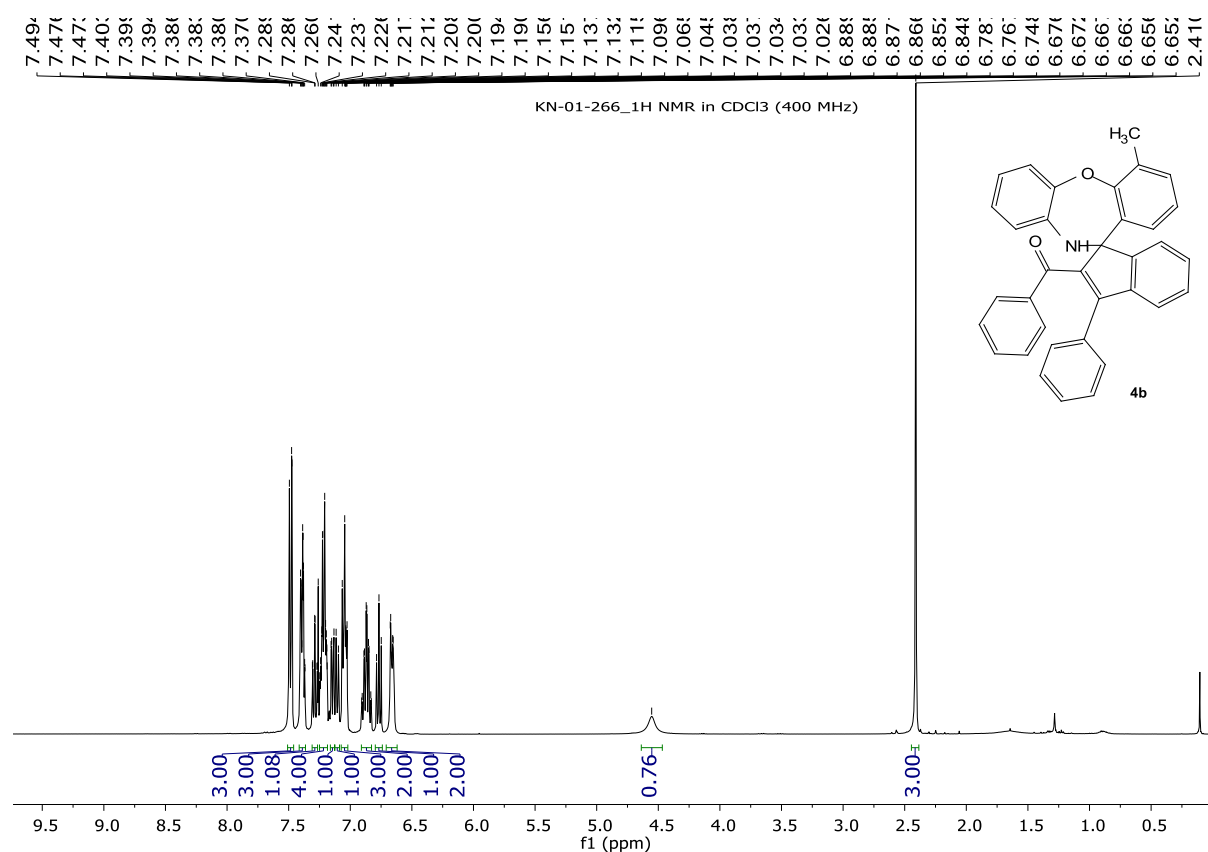

### <sup>13</sup>C NMR of 4b (100 MHz, CDCl<sub>3</sub>):

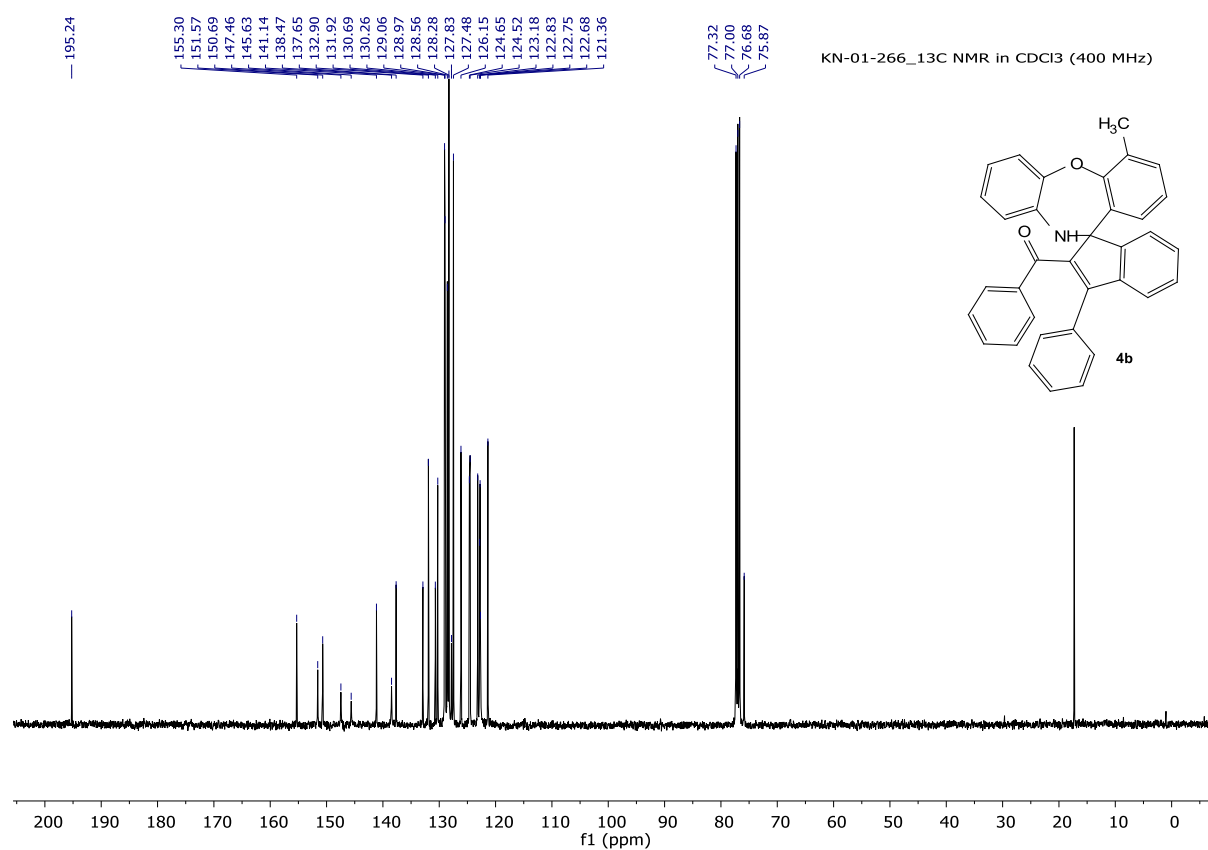

### <sup>1</sup>H NMR of 4c (400 MHz, CDCl<sub>3</sub>):

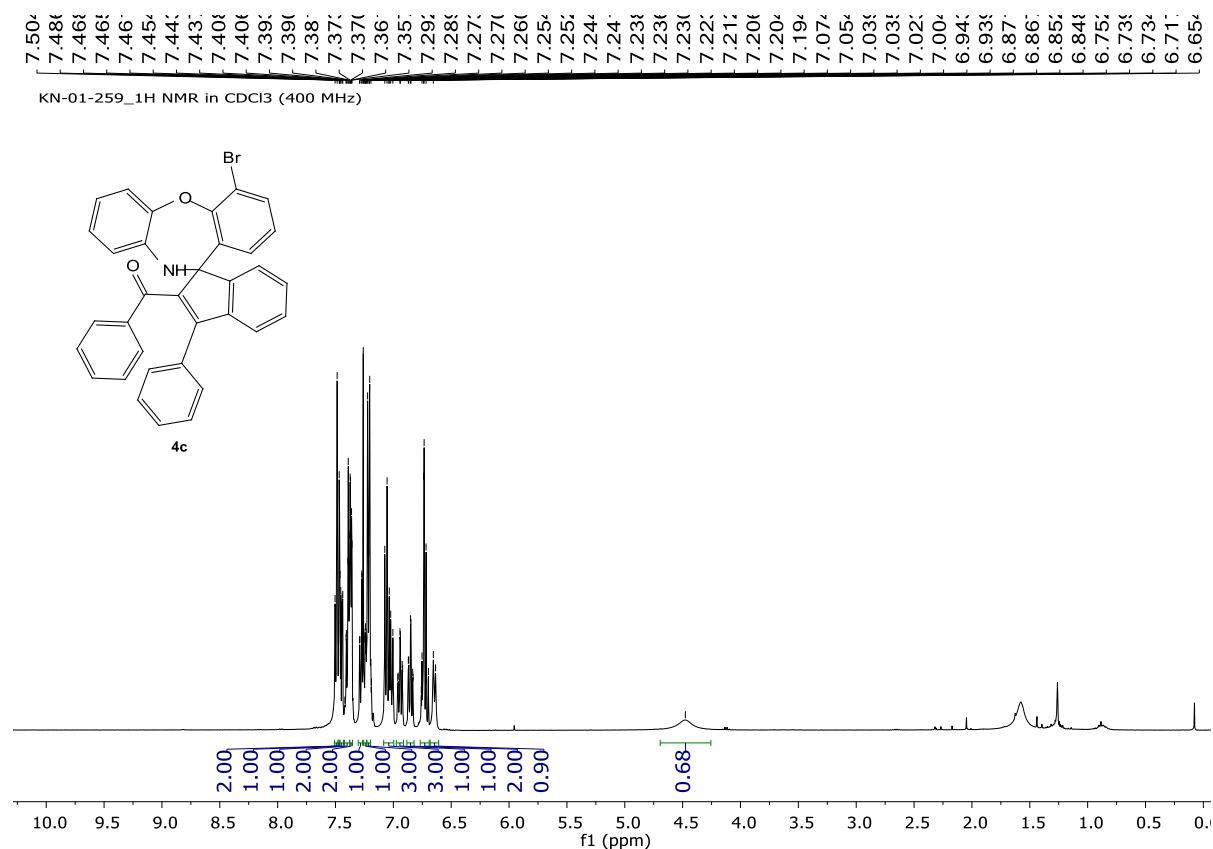

### <sup>13</sup>C NMR of 4c (100 MHz, CDCl<sub>3</sub>):

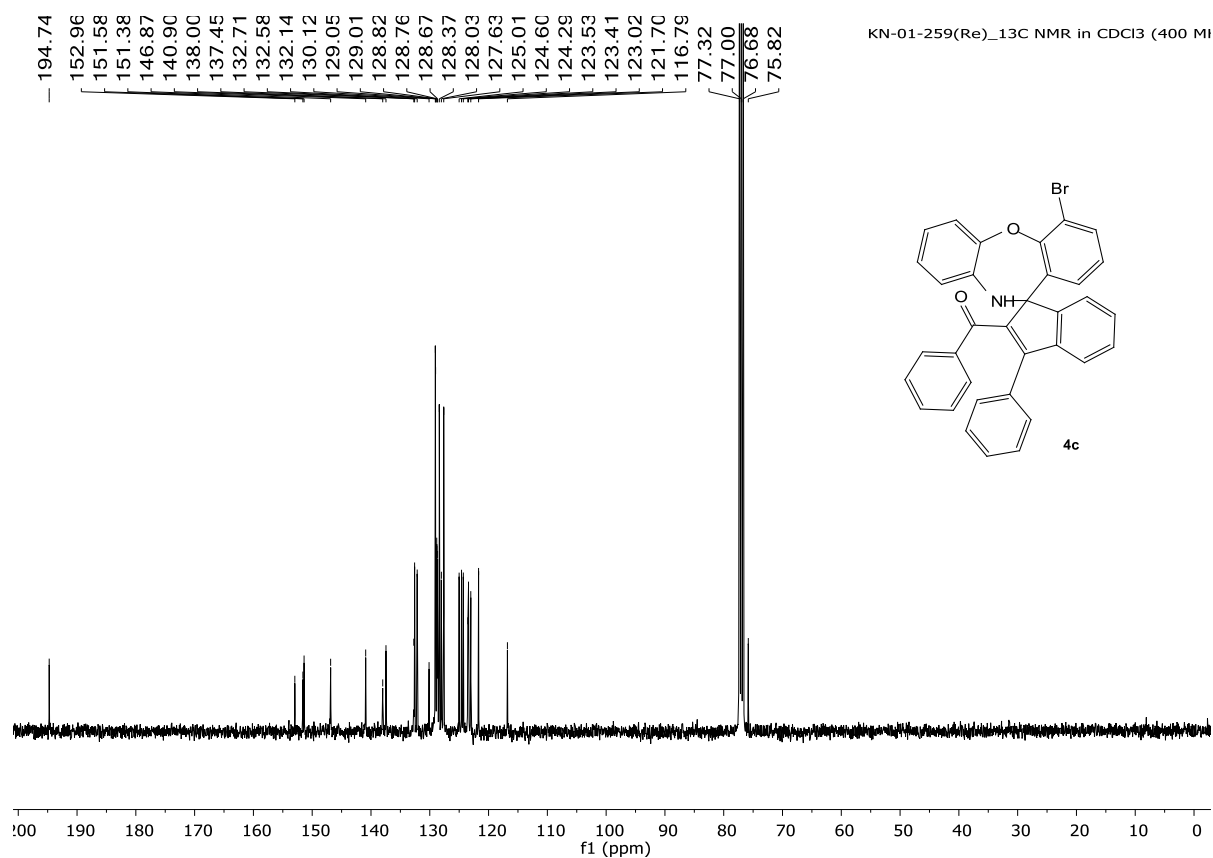

### <sup>1</sup>H NMR of 4d (400 MHz, CDCl<sub>3</sub>):

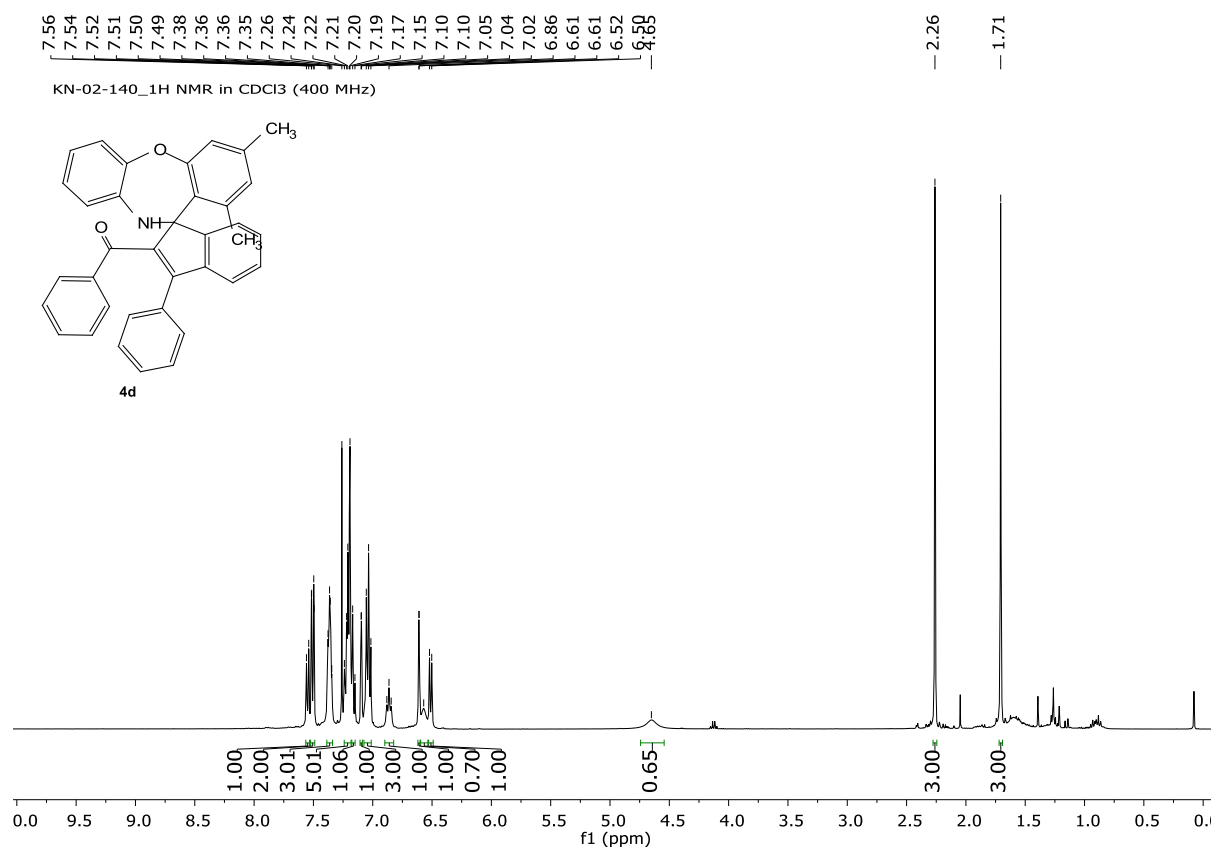

### <sup>13</sup>C NMR of 4d (100 MHz, CDCl<sub>3</sub>):

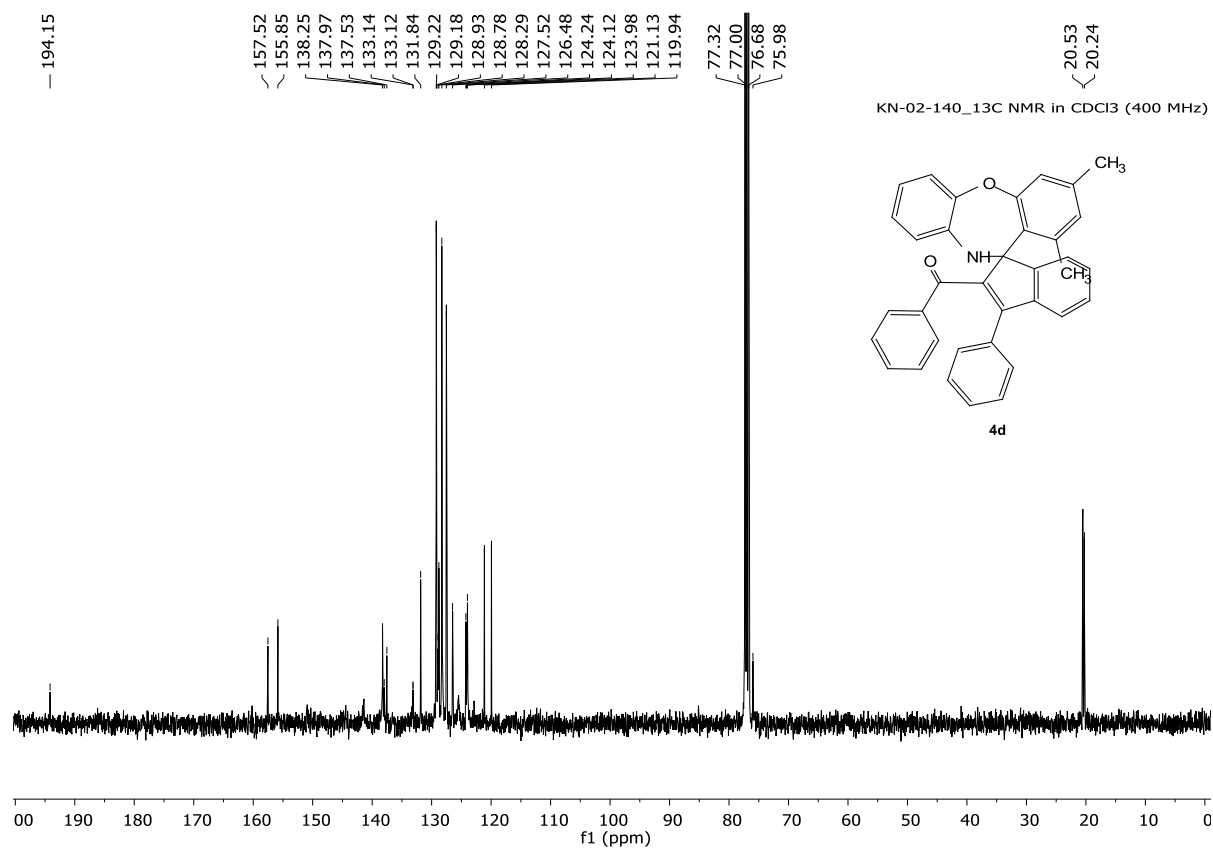

### <sup>1</sup>H NMR of 4e (400 MHz, CDCl<sub>3</sub>):

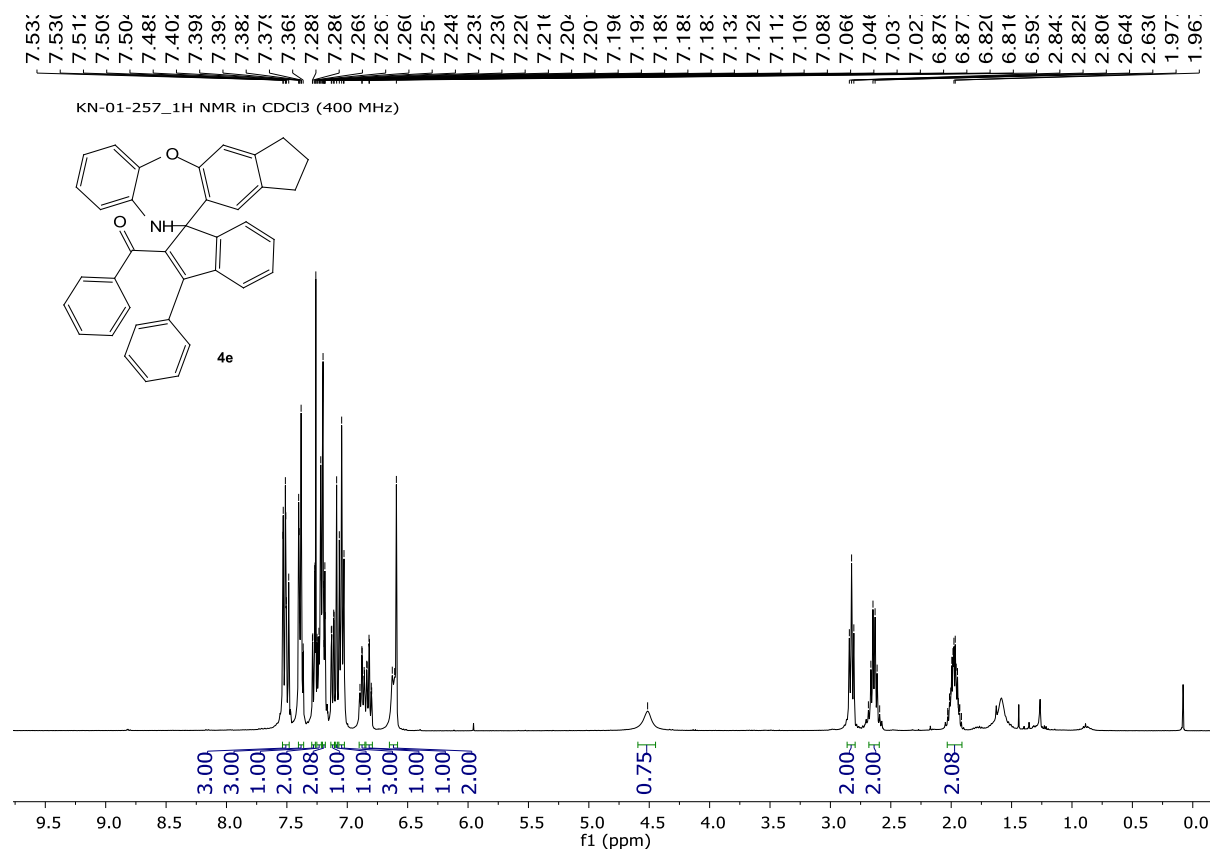

### <sup>13</sup>C NMR of 4e (100 MHz, CDCl<sub>3</sub>):

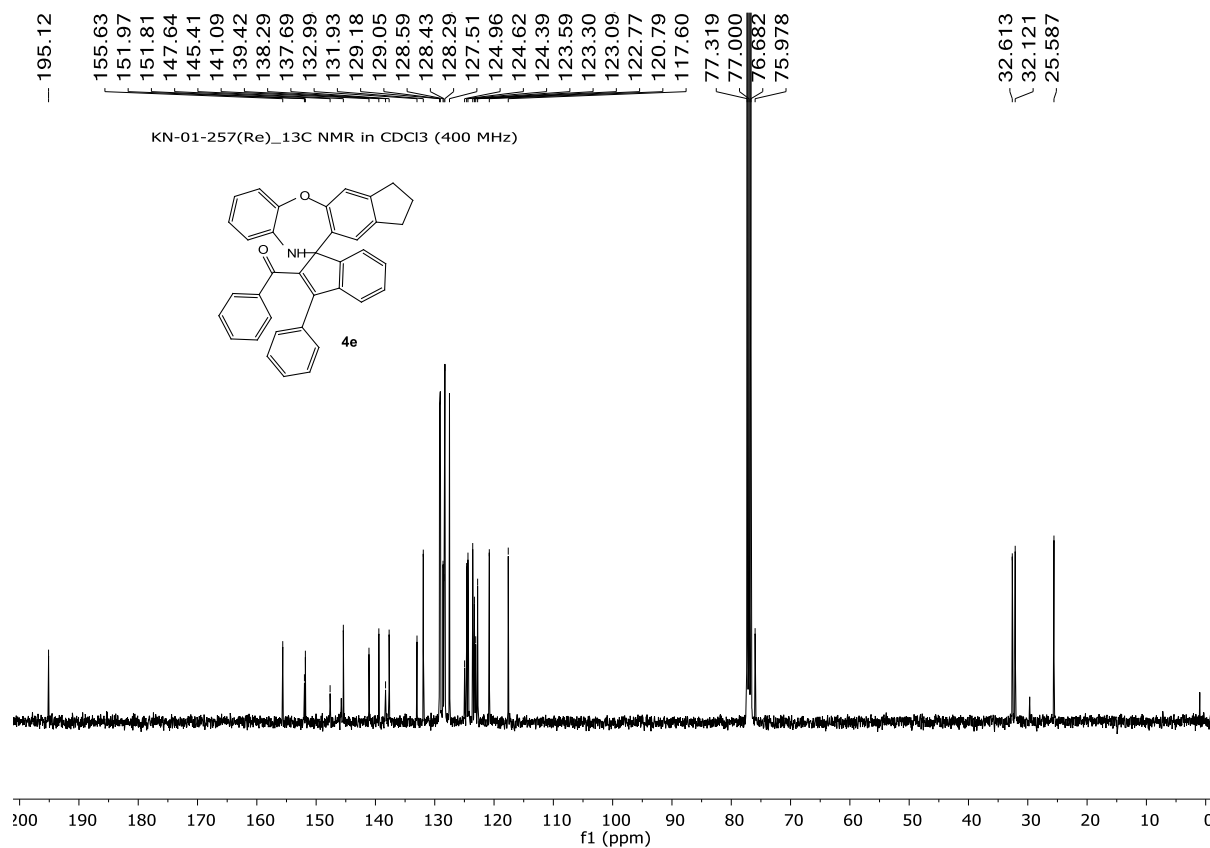

### <sup>1</sup>H NMR of 4f (400 MHz, CDCl<sub>3</sub>):

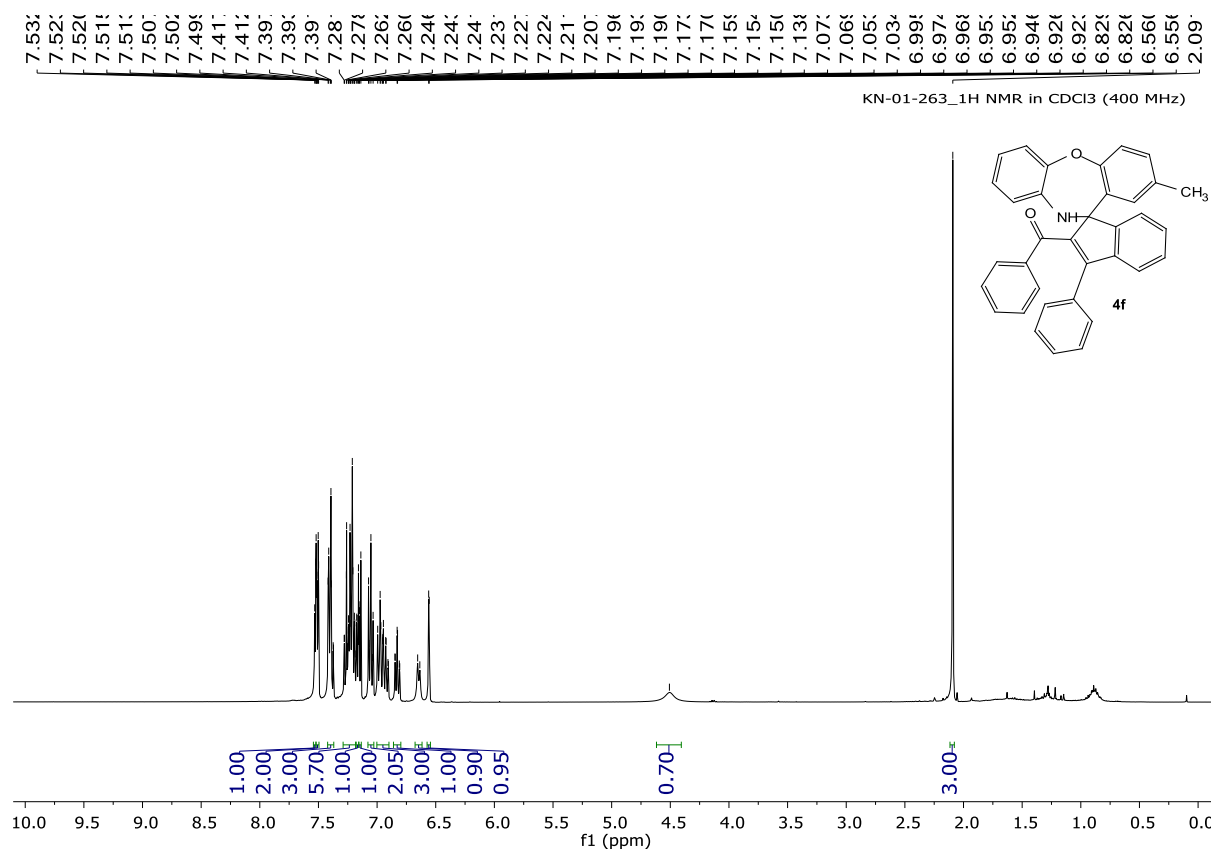

### <sup>13</sup>C NMR of 4f (100 MHz, CDCl<sub>3</sub>):

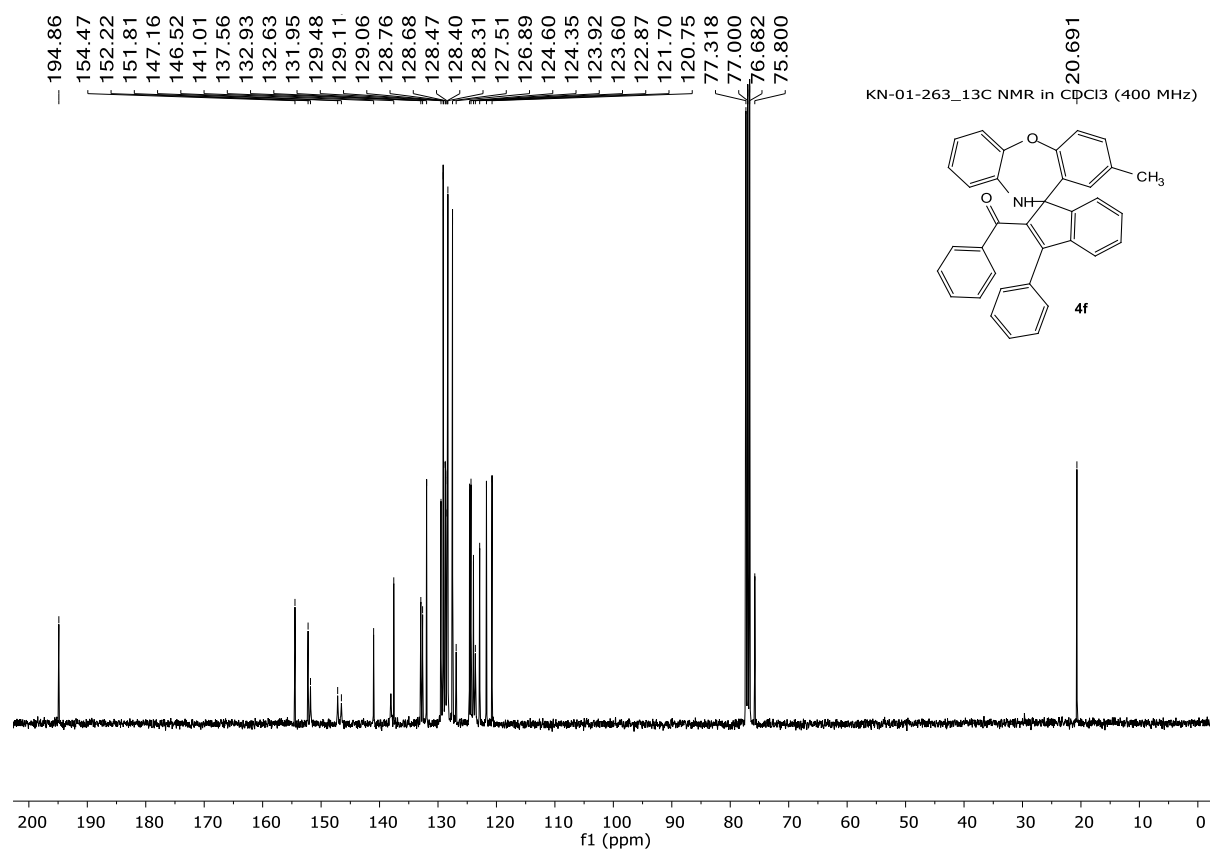

### <sup>1</sup>H NMR of 4g (400 MHz, CDCl<sub>3</sub>):

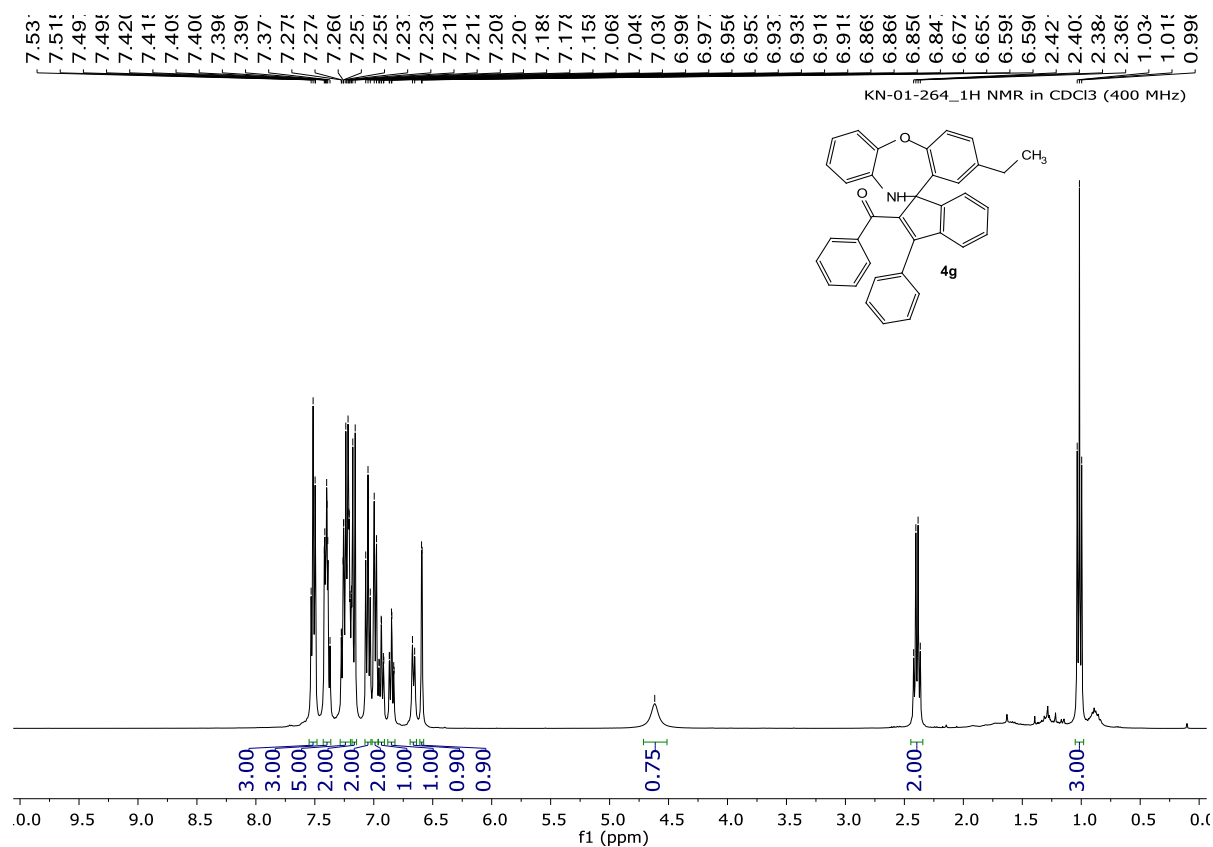

### <sup>13</sup>C NMR of 4g (100 MHz, CDCl<sub>3</sub>):

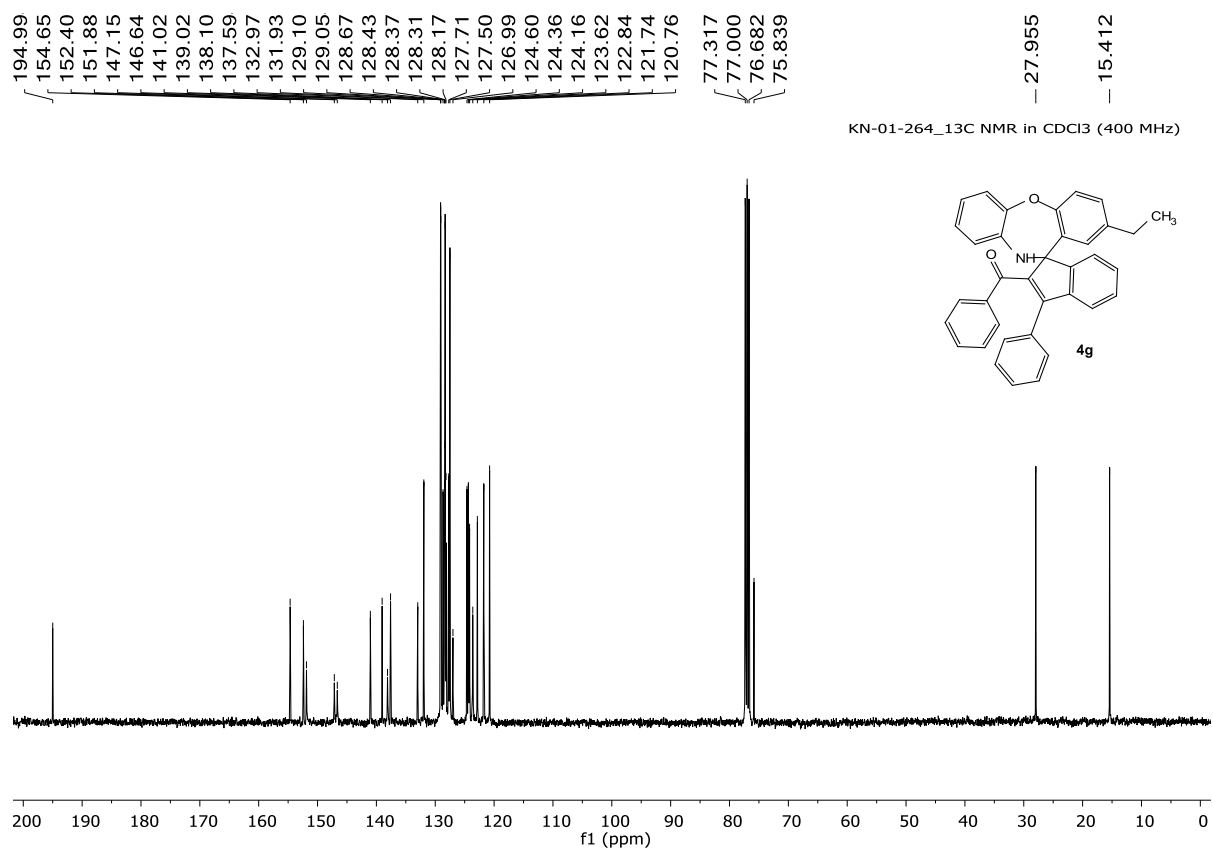



### <sup>1</sup>H NMR of 4h (400 MHz, CDCl<sub>3</sub>):

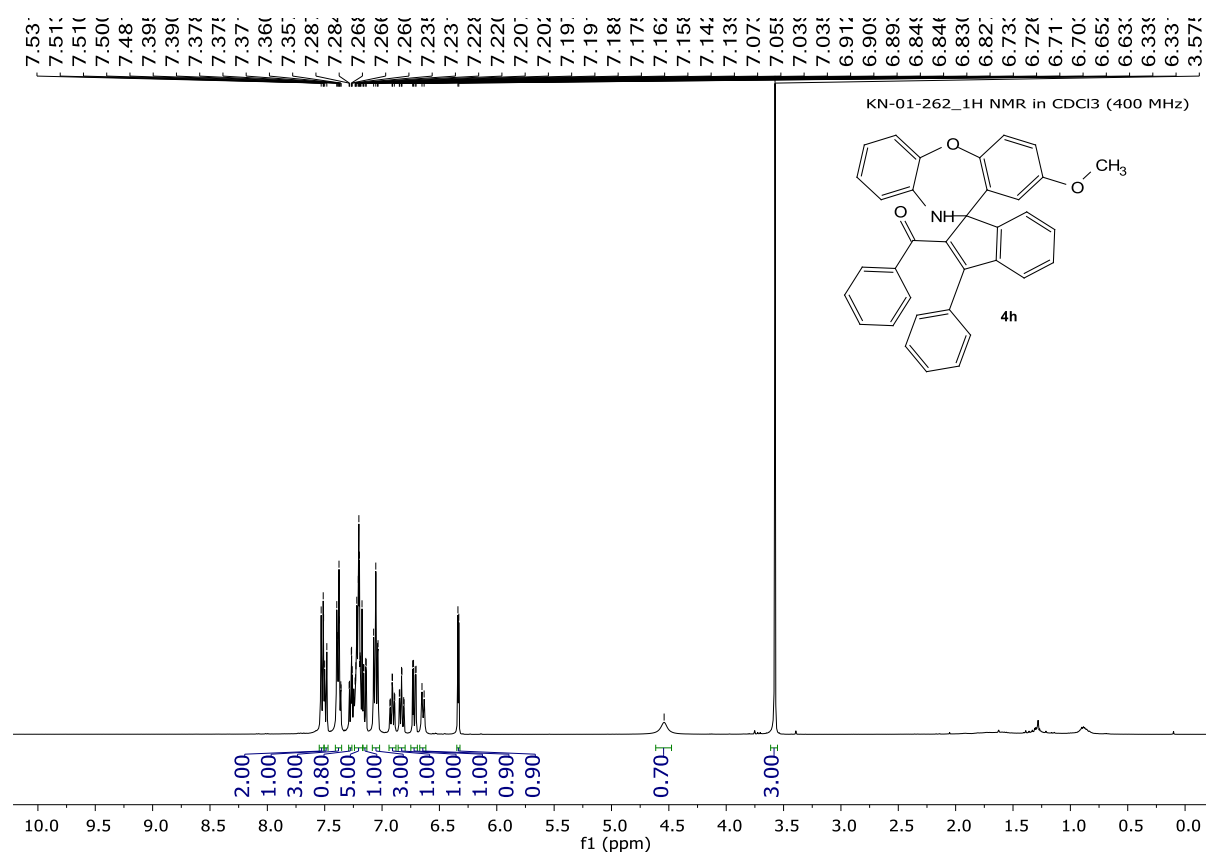

### <sup>13</sup>C NMR of 4h (100 MHz, CDCl<sub>3</sub>):

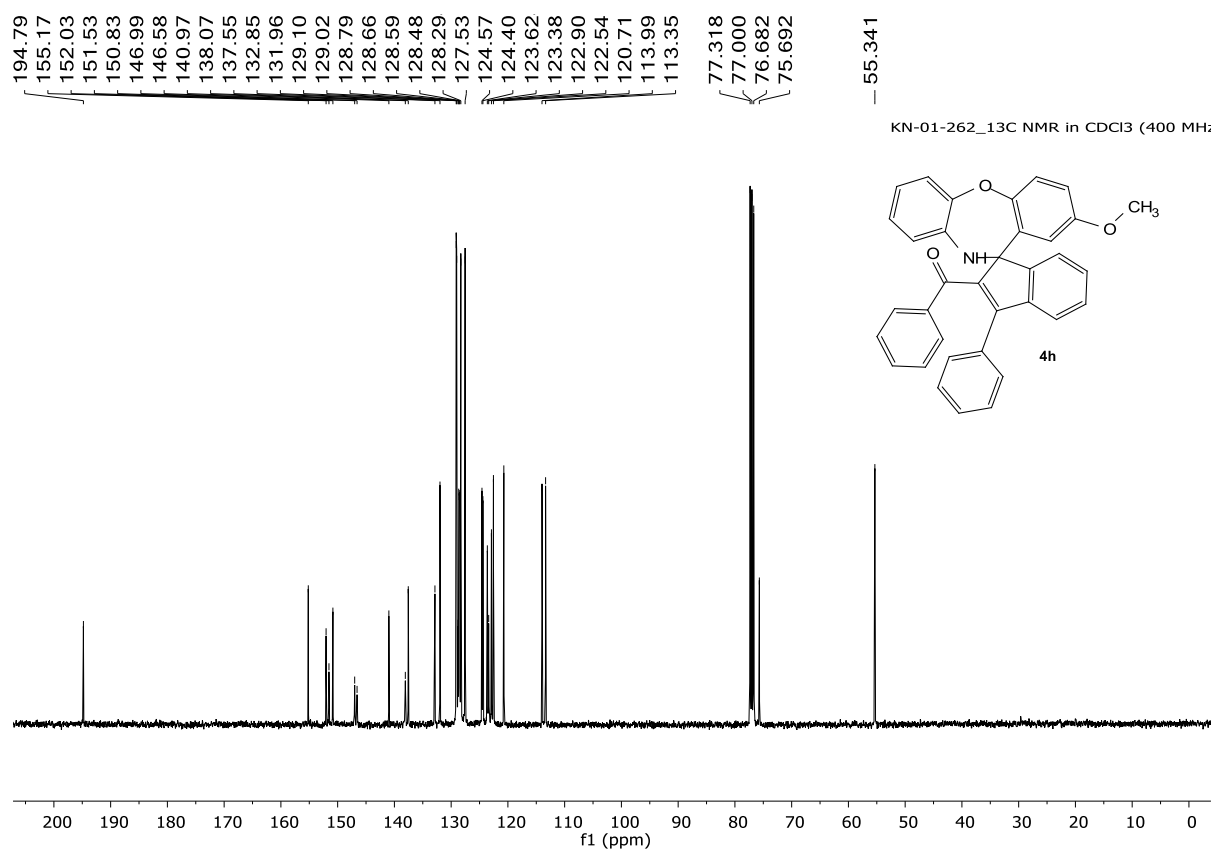

### <sup>1</sup>H NMR of 4i (400 MHz, CDCl<sub>3</sub>):

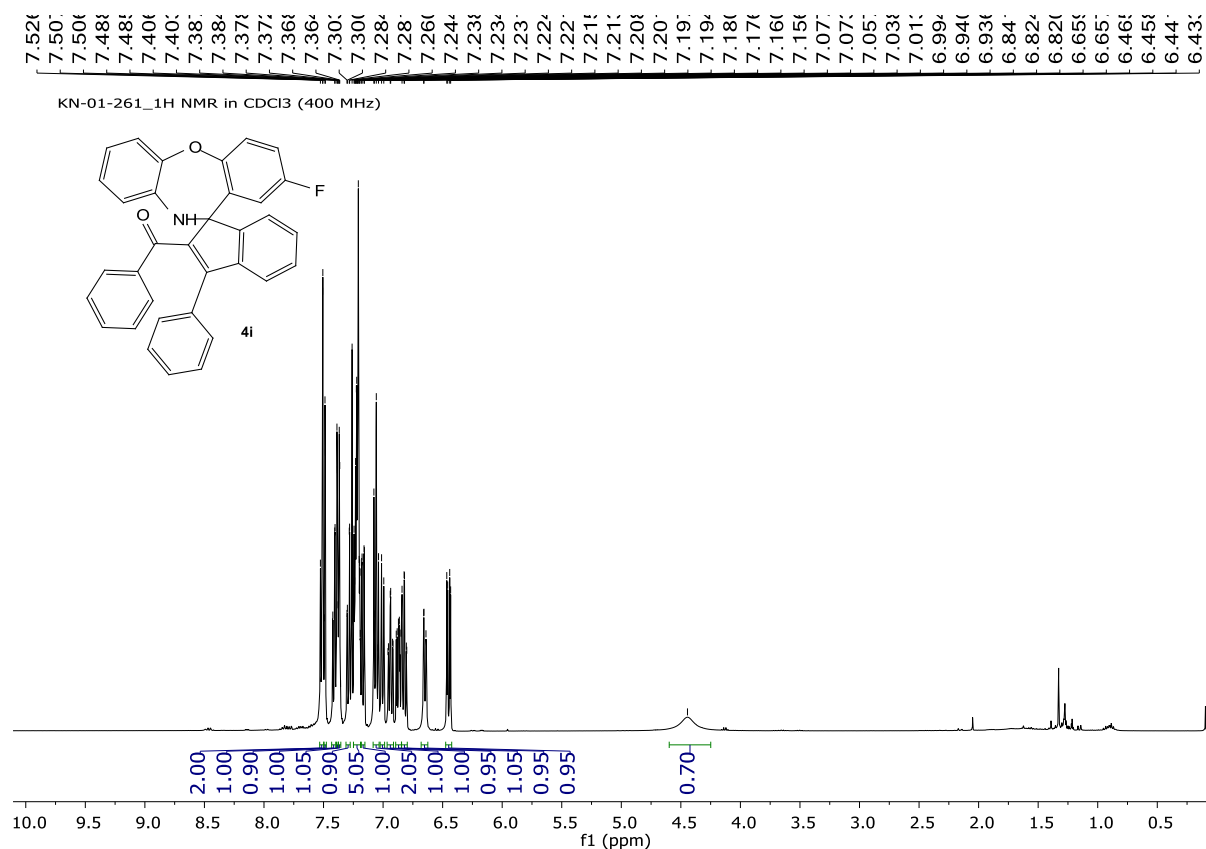

### <sup>13</sup>C NMR of 4i (100 MHz, CDCl<sub>3</sub>):

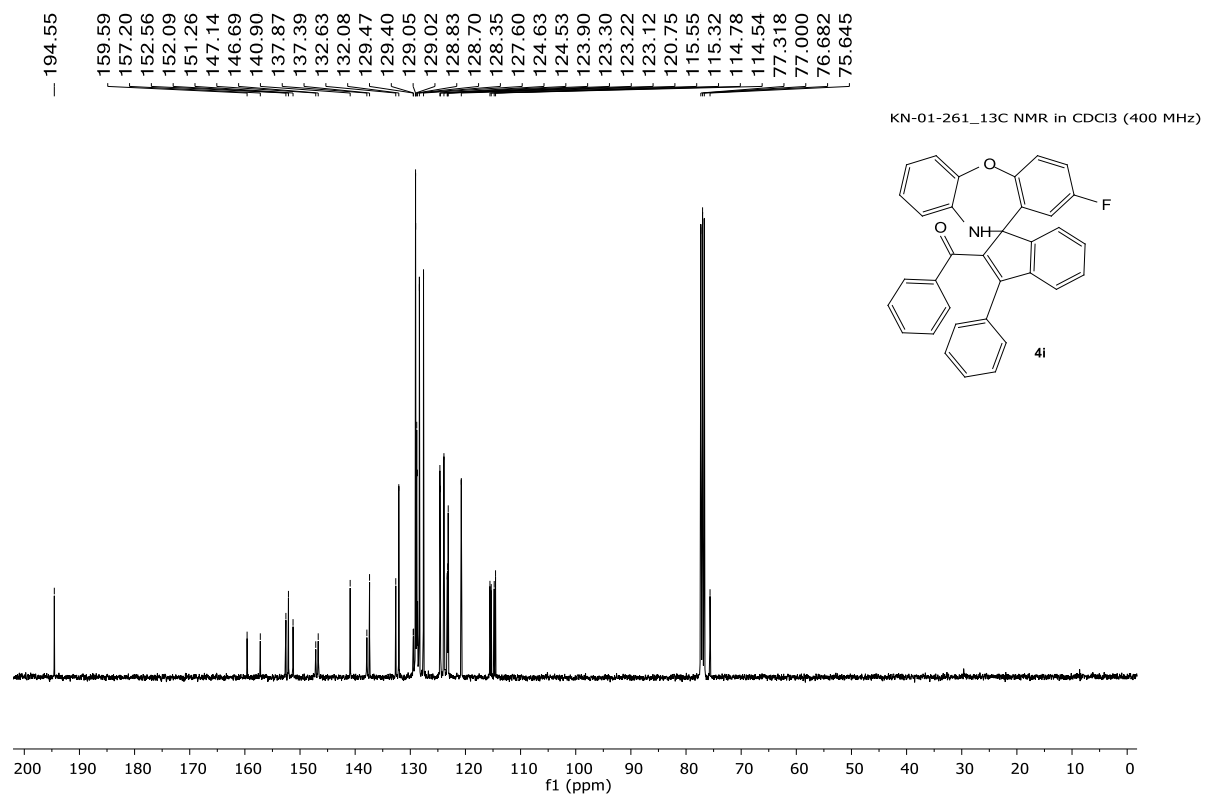

# $^{19}\text{F}$ NMR of 4i (376 MHz, $\text{CDCl}_3$ ):

KN-01-261\_19F NMR in  $\text{CDCl}_3$  (400 MHz)

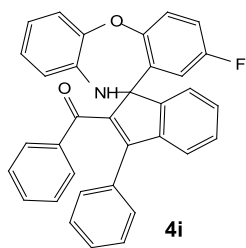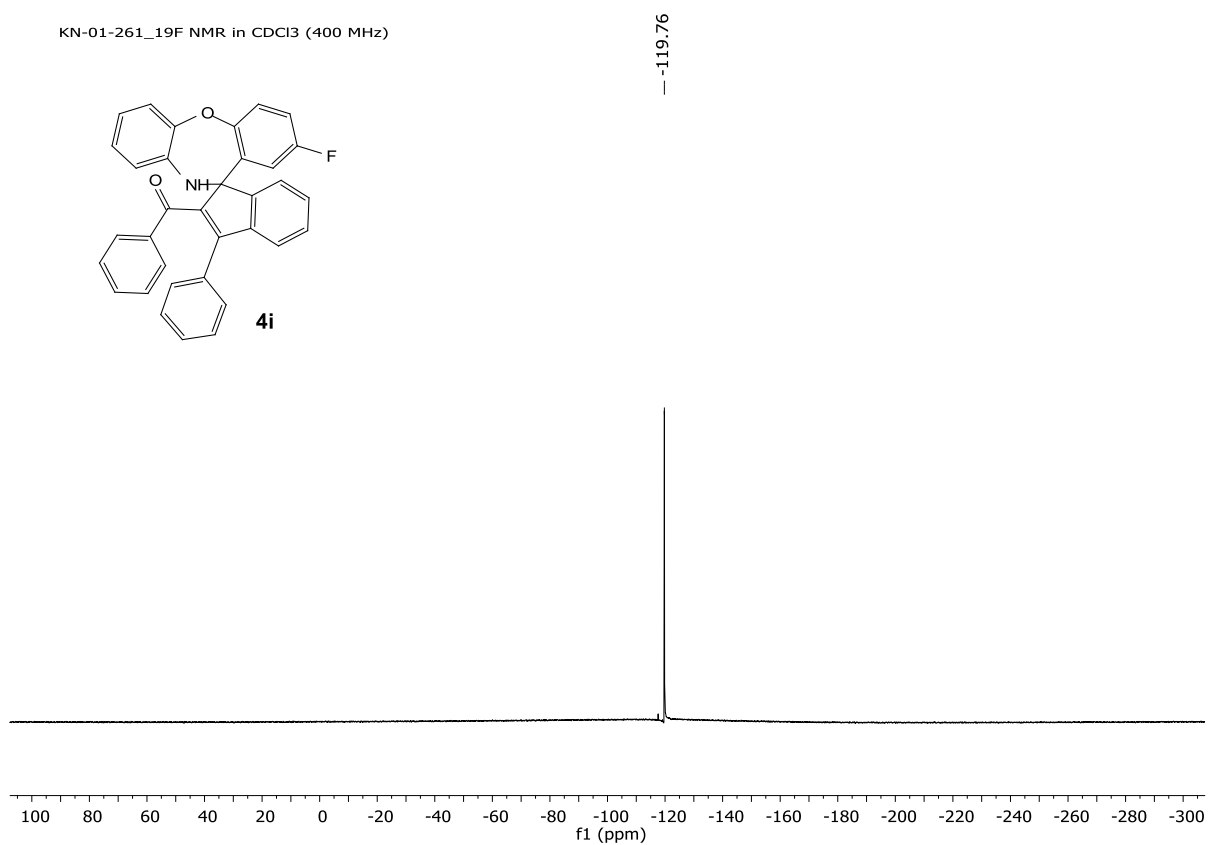

### <sup>1</sup>H NMR of 4j (400 MHz, CDCl<sub>3</sub>):

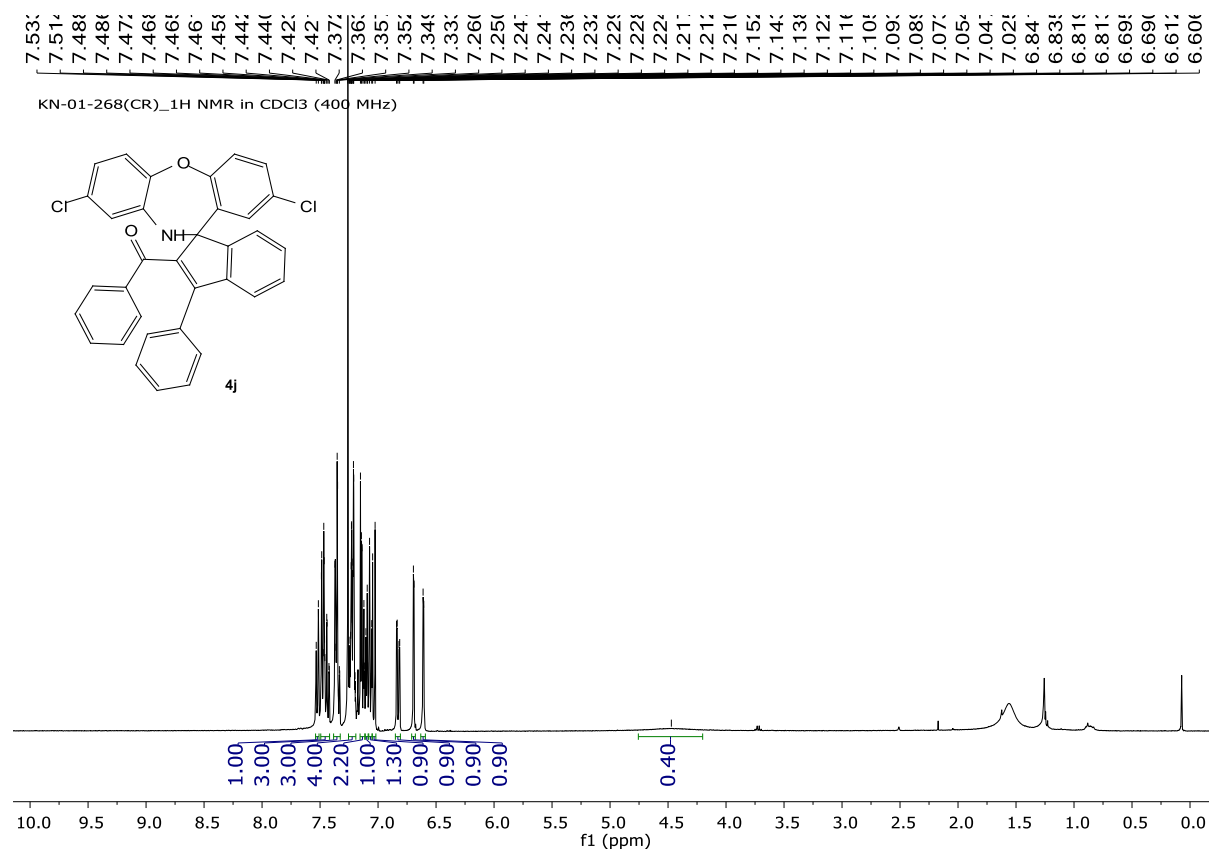

### <sup>13</sup>C NMR of 4j (100 MHz, CDCl<sub>3</sub>):

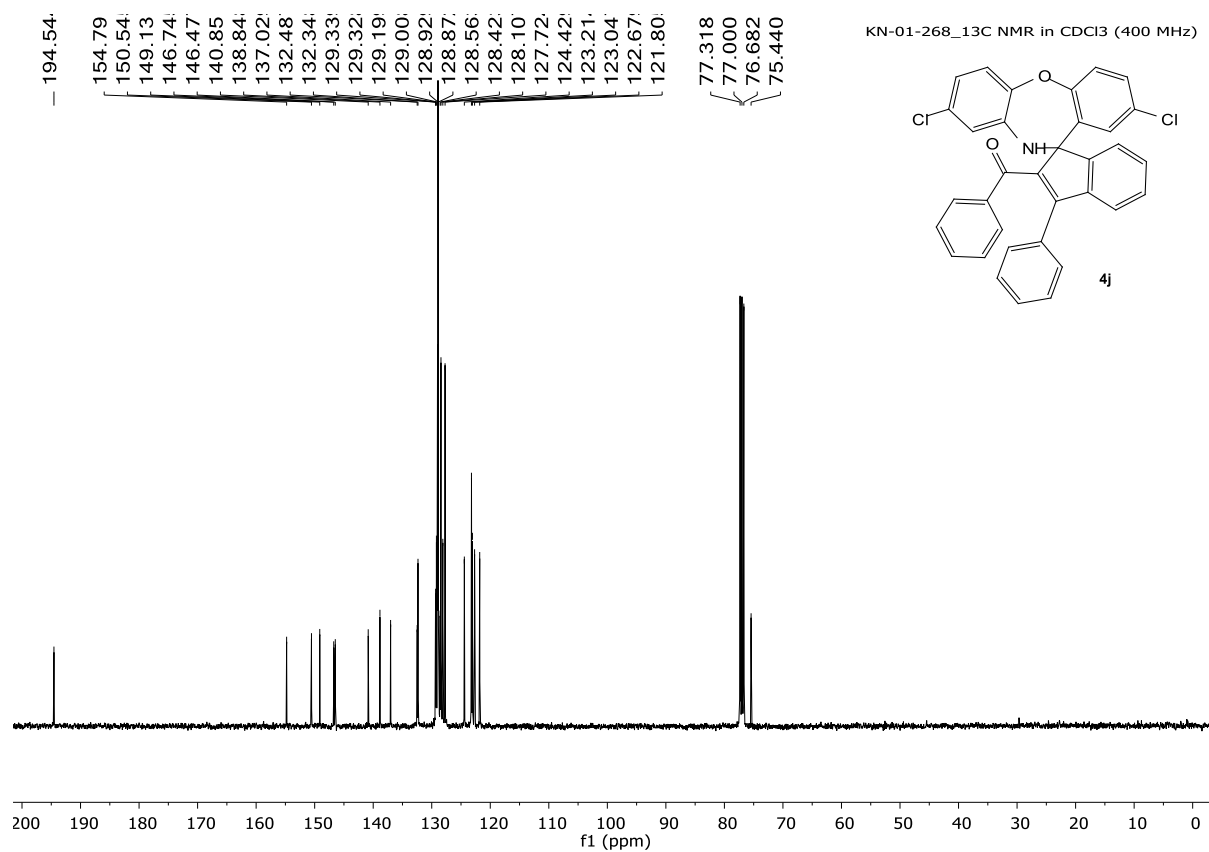

### <sup>1</sup>H NMR of 4k (400 MHz, CDCl<sub>3</sub>):

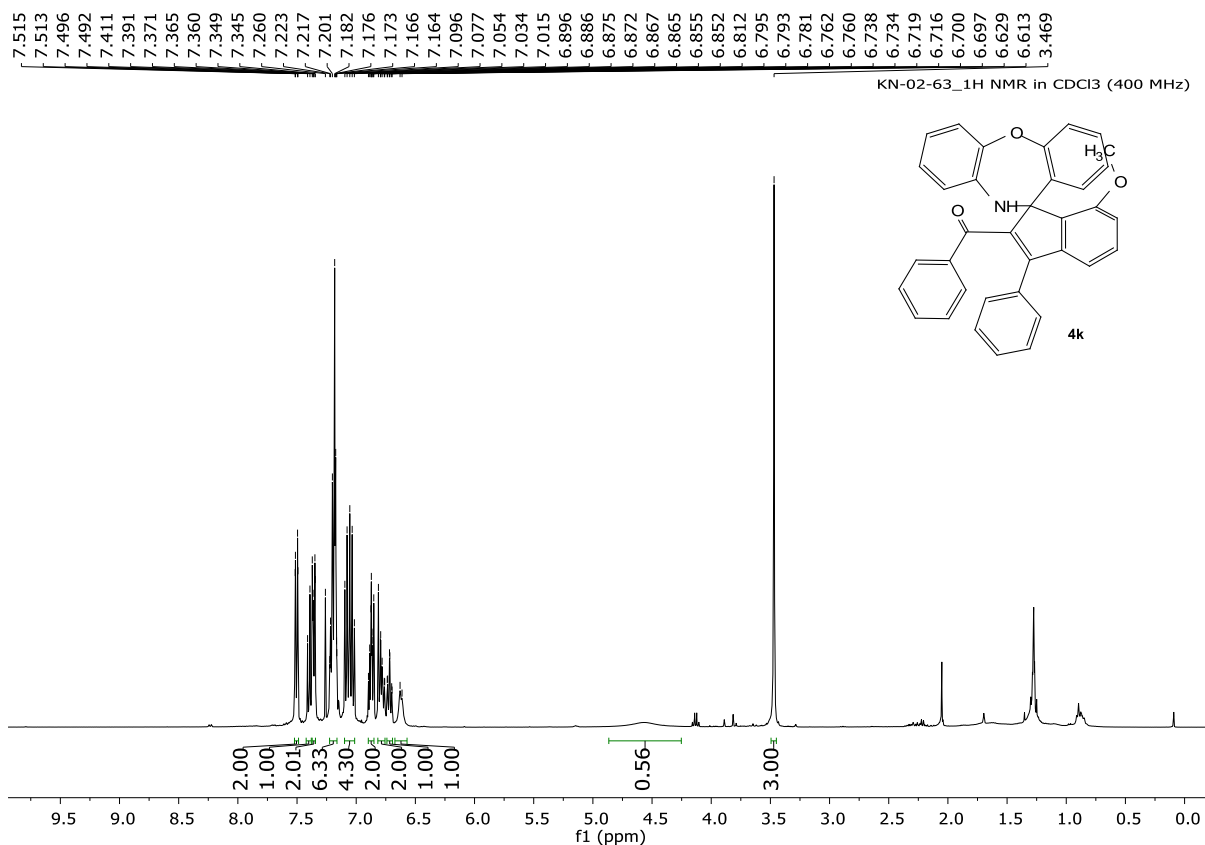

### <sup>13</sup>C NMR of 4k (100 MHz, CDCl<sub>3</sub>):

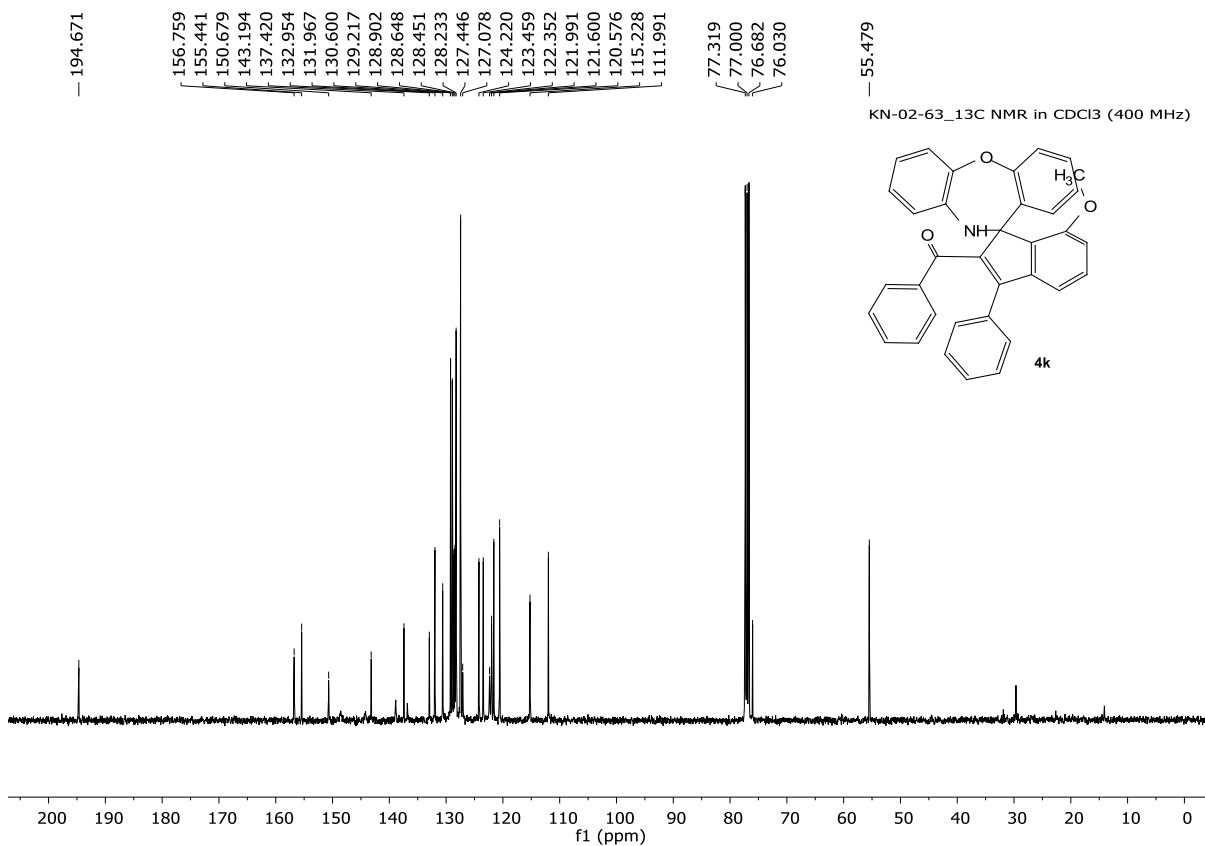

### <sup>1</sup>H NMR of 4l (400 MHz, CDCl<sub>3</sub>):

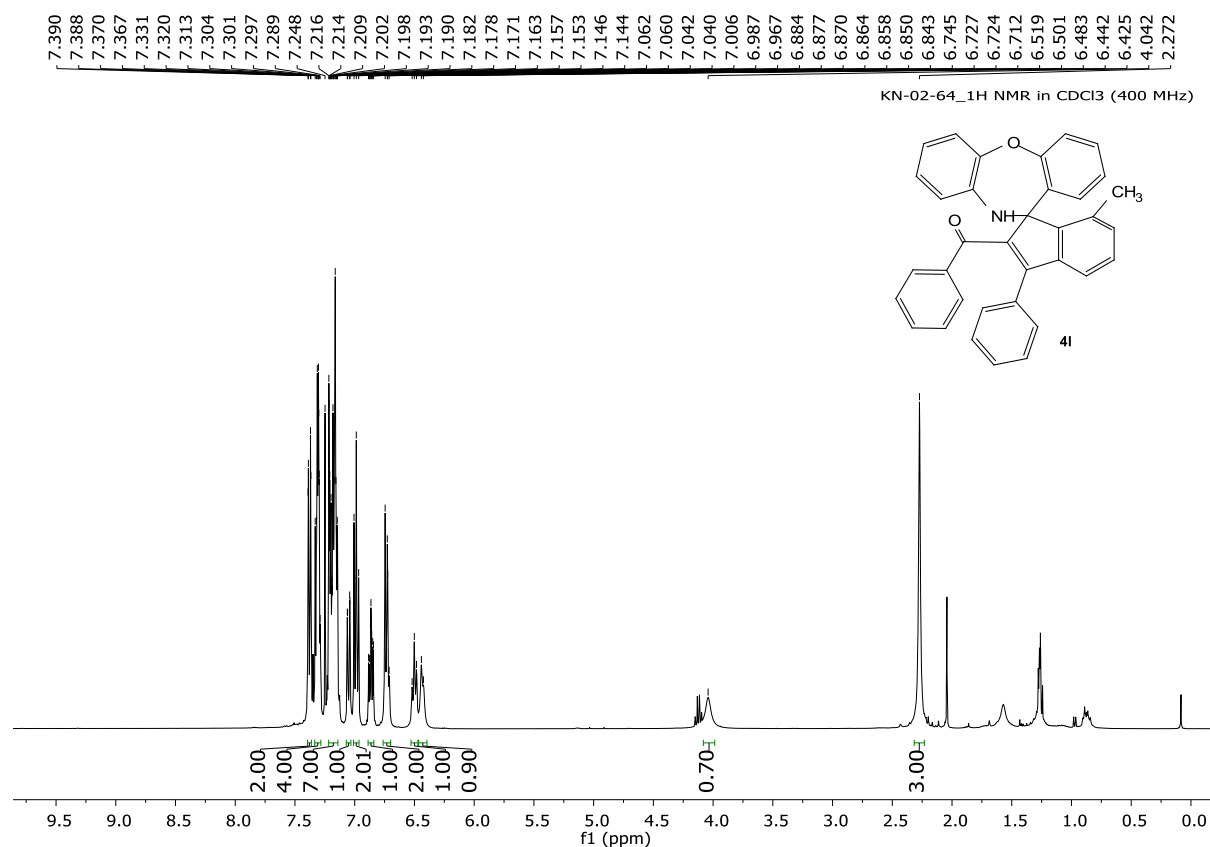

### <sup>13</sup>C NMR of 4l (100 MHz, CDCl<sub>3</sub>):

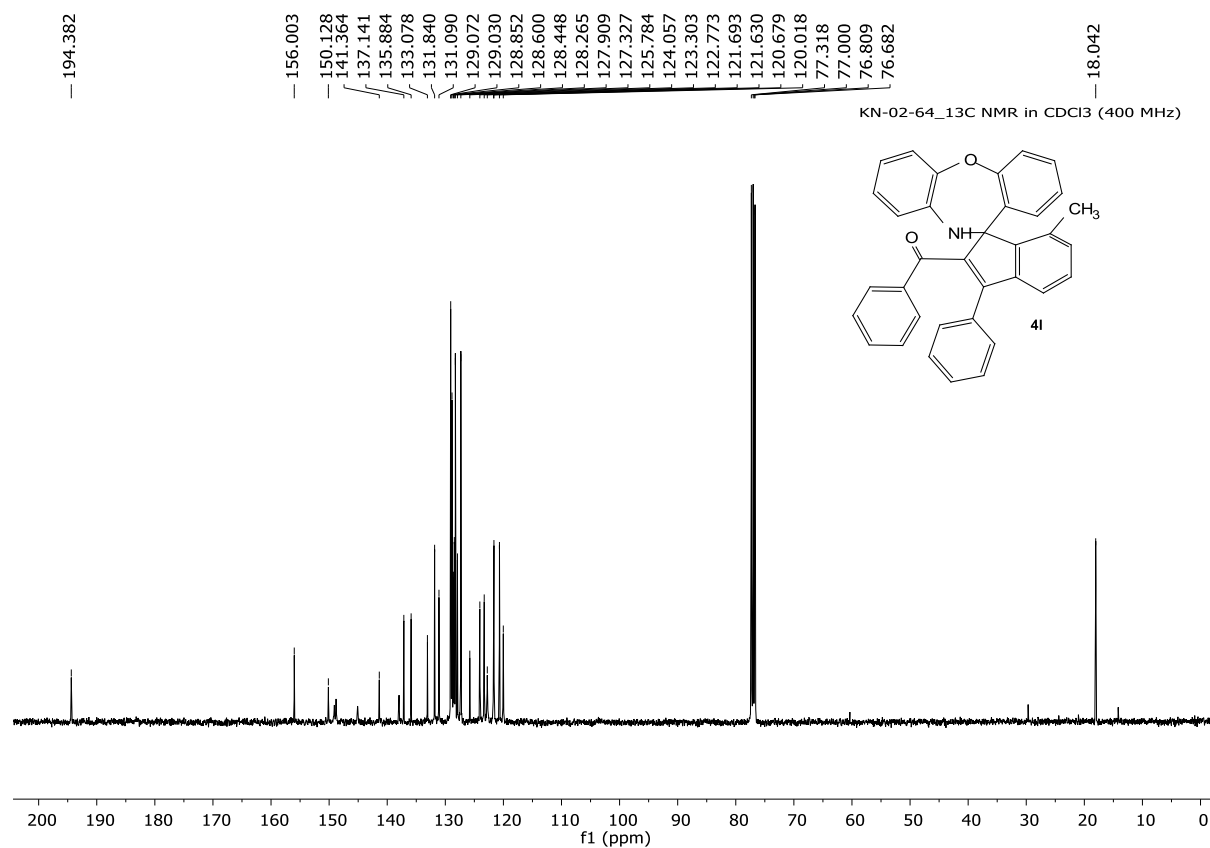

### <sup>1</sup>H NMR of 4m (400 MHz, CDCl<sub>3</sub>):

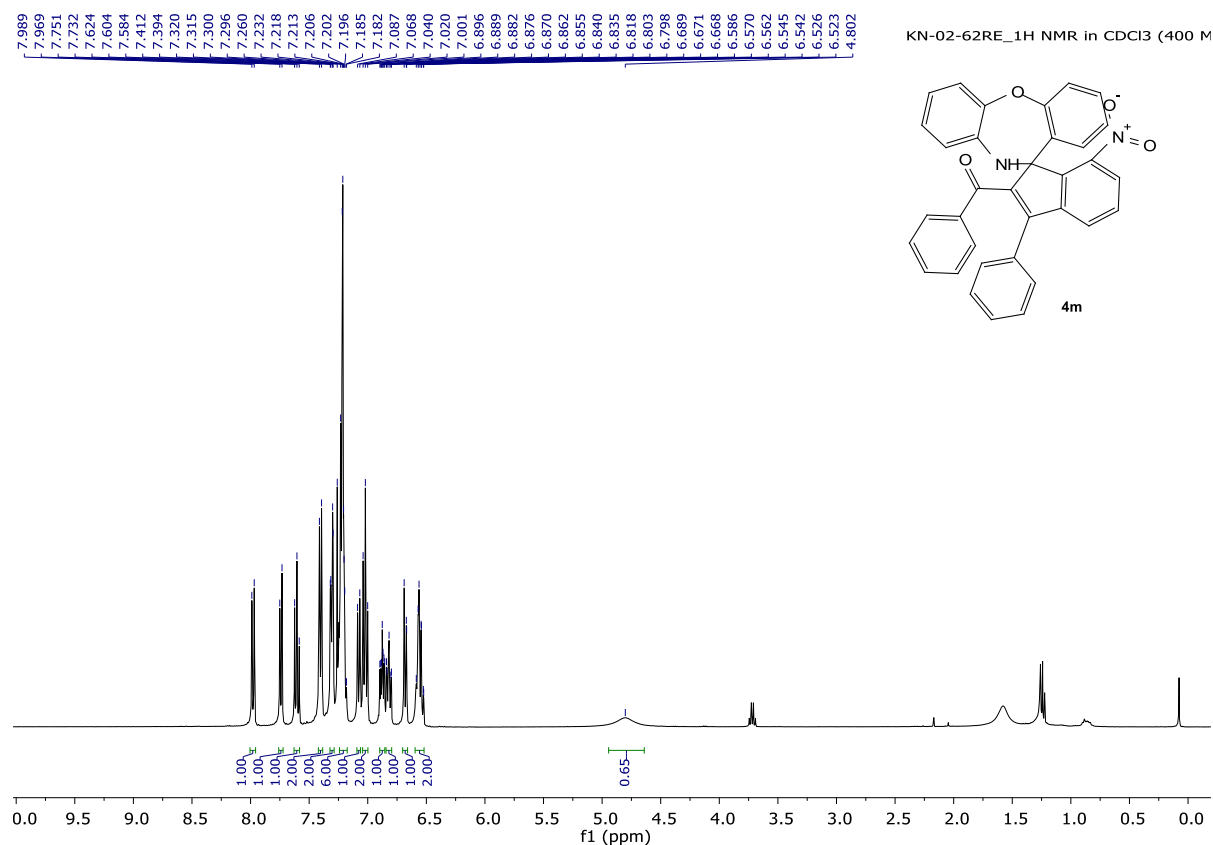

### <sup>13</sup>C NMR of 4m (100 MHz, CDCl<sub>3</sub>):

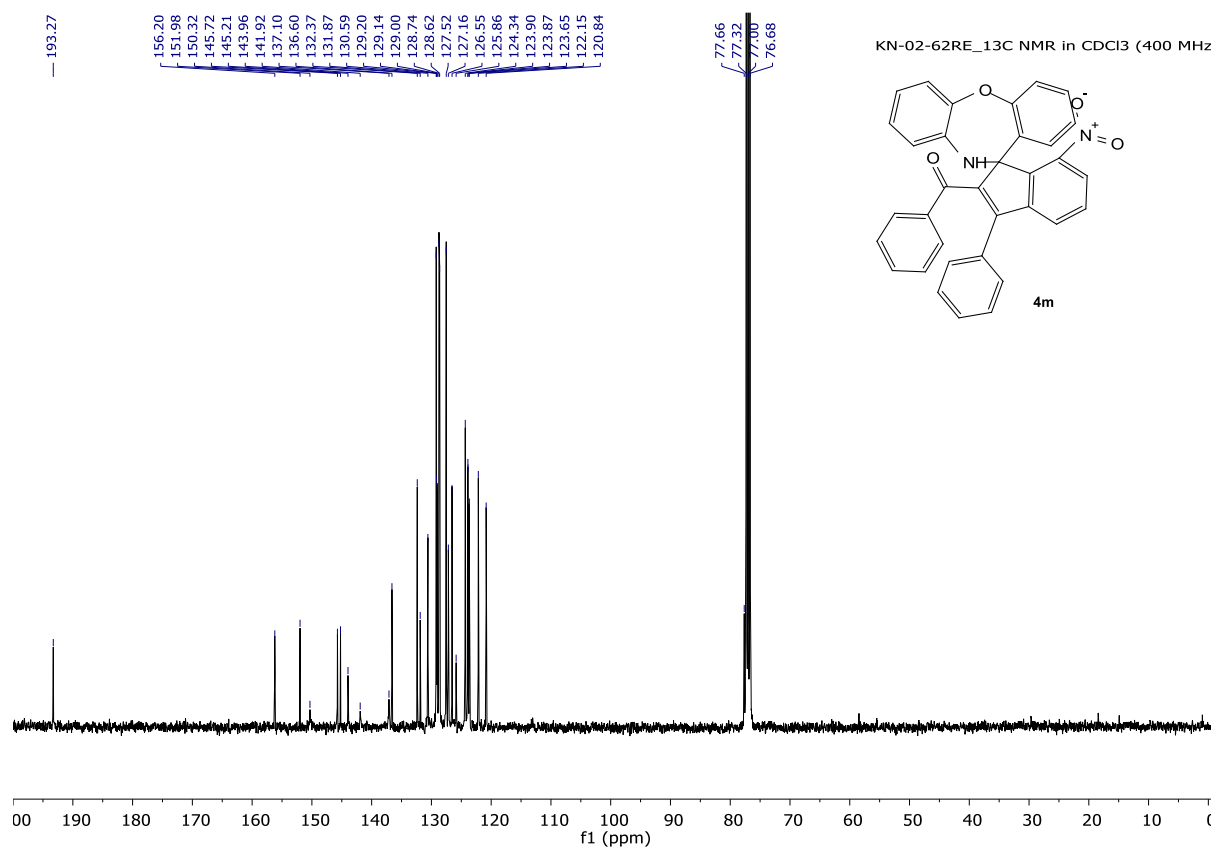

### <sup>1</sup>H NMR of 4n (400 MHz, CDCl<sub>3</sub>):

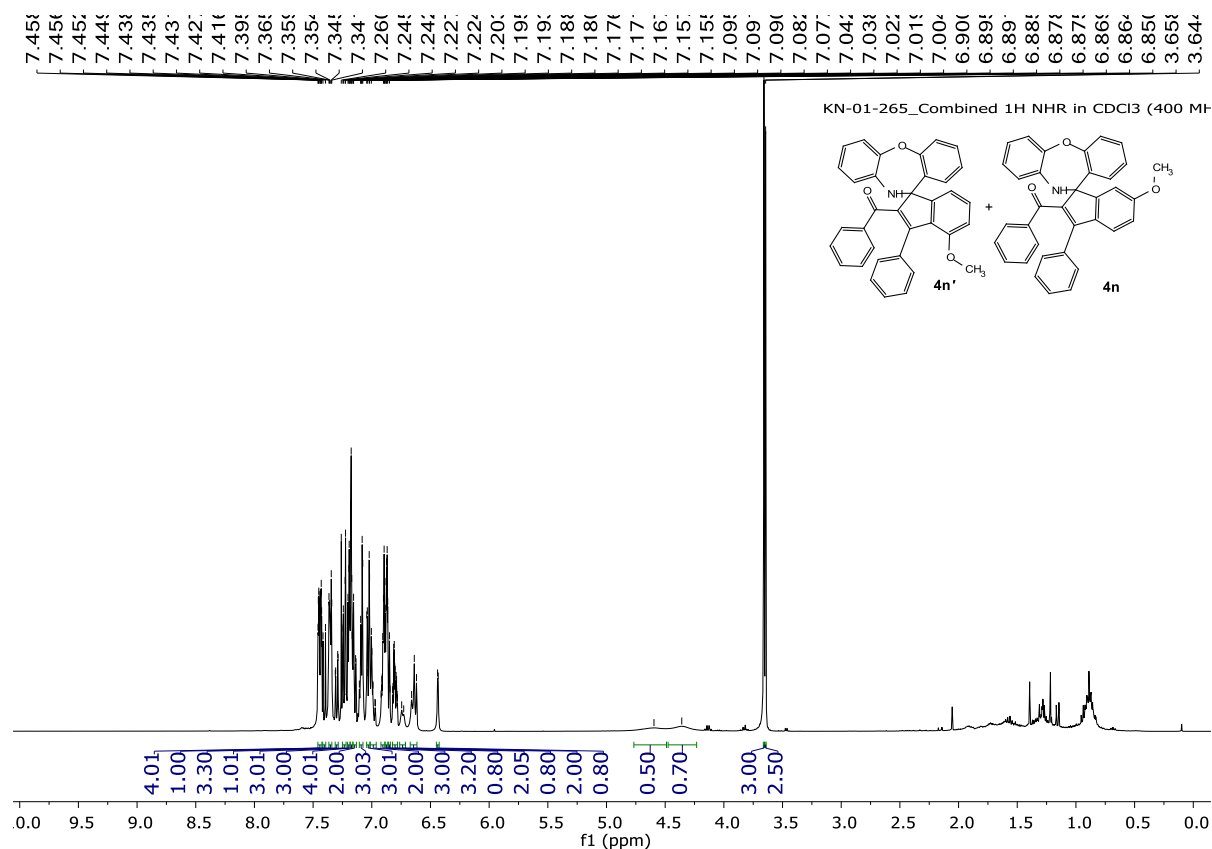

### <sup>13</sup>C NMR of 4n (100 MHz, CDCl<sub>3</sub>):

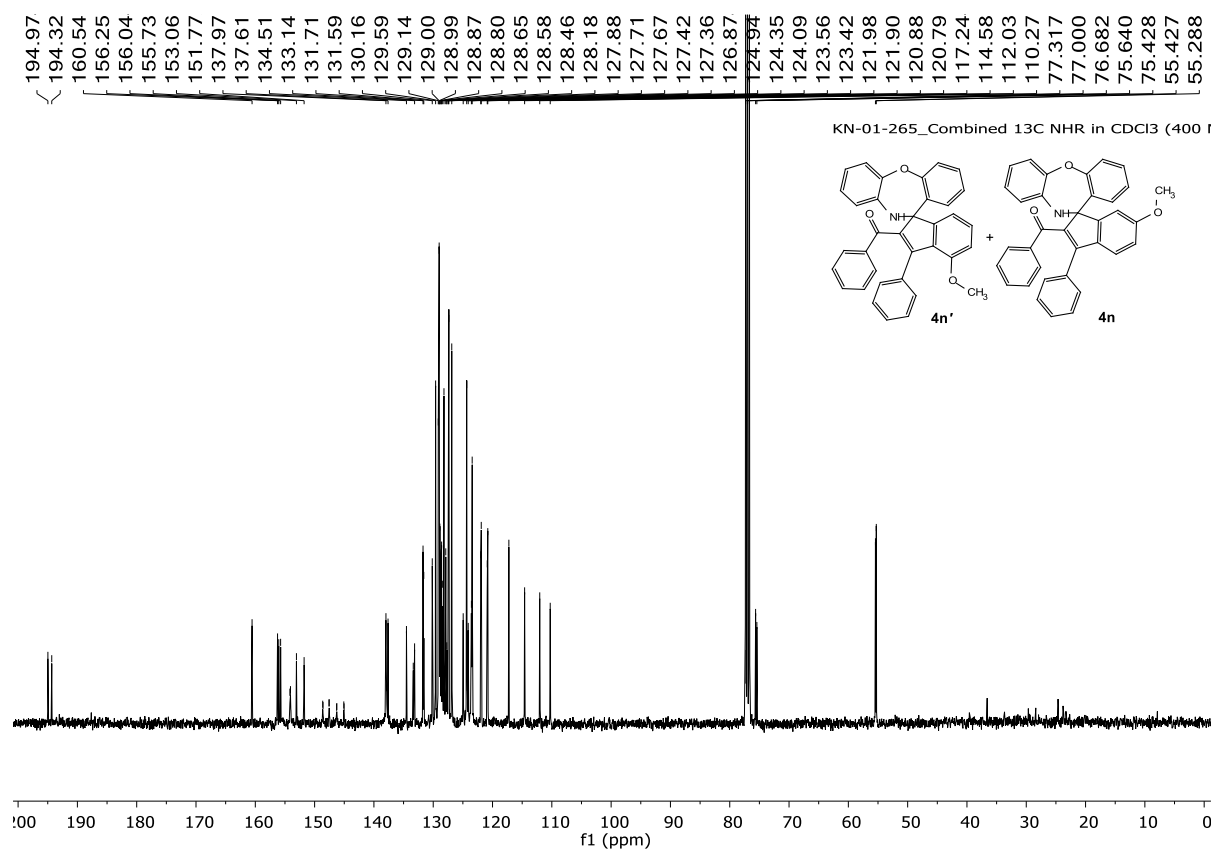



### <sup>1</sup>H NMR of 4o (400 MHz, CDCl<sub>3</sub>):

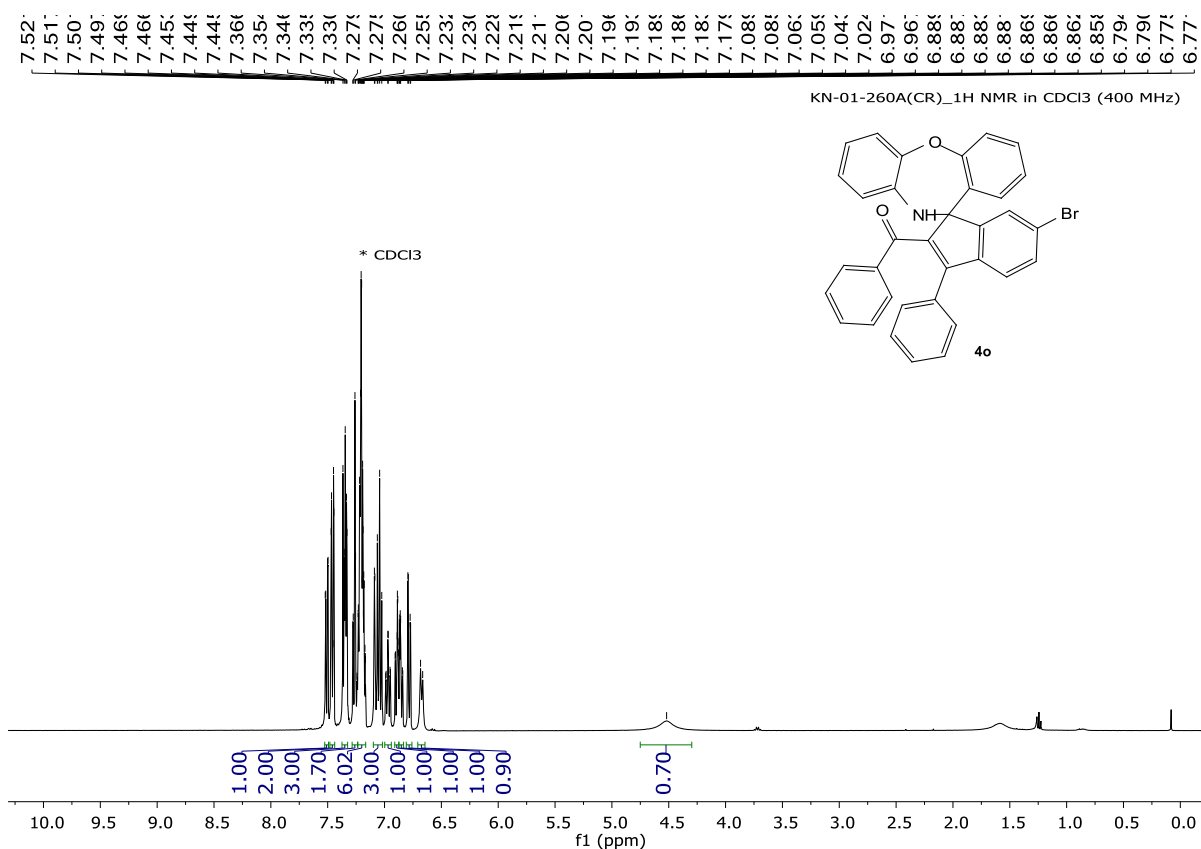

### <sup>13</sup>C NMR of 4o (100 MHz, CDCl<sub>3</sub>):

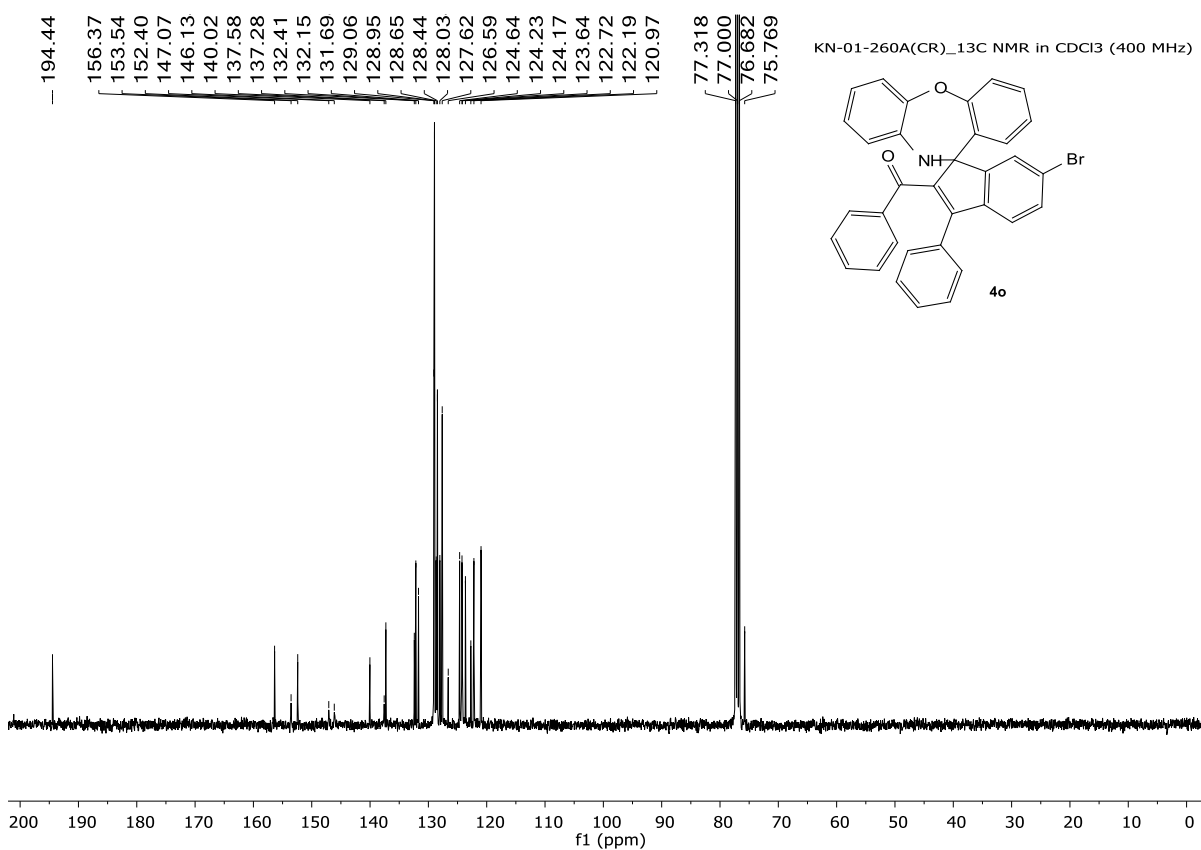

### <sup>1</sup>H NMR of 4p (400 MHz, CDCl<sub>3</sub>):

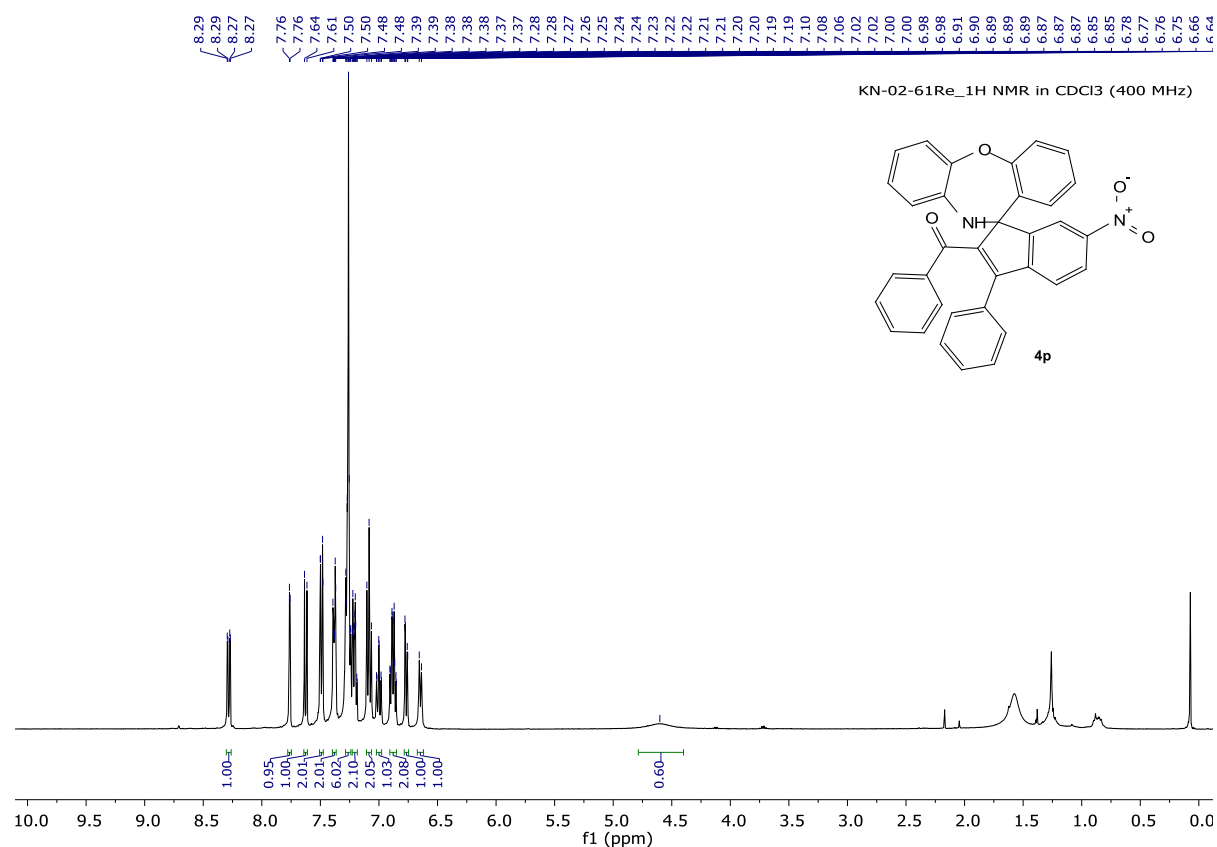

### <sup>13</sup>C NMR of 4p (100 MHz, CDCl<sub>3</sub>):

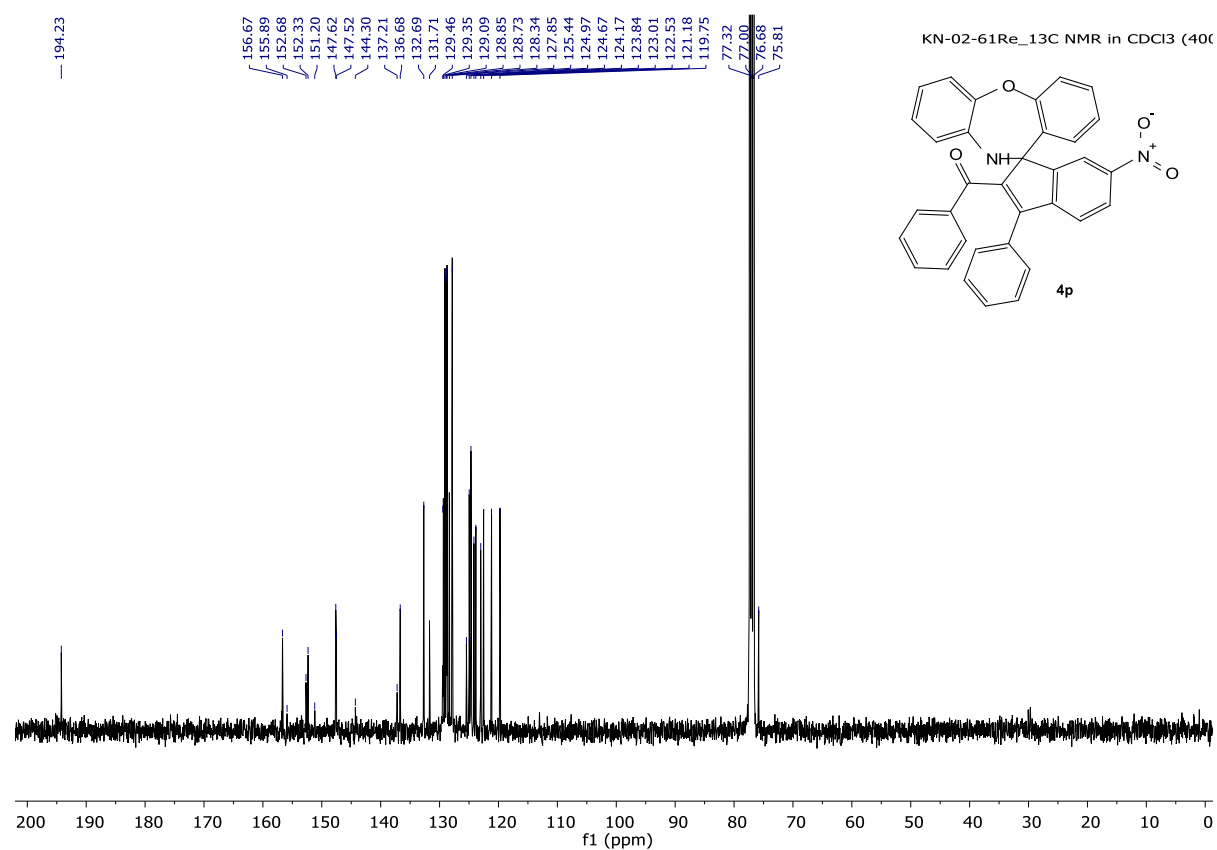

**<sup>1</sup>H NMR of 4q (400 MHz, CDCl<sub>3</sub>):**

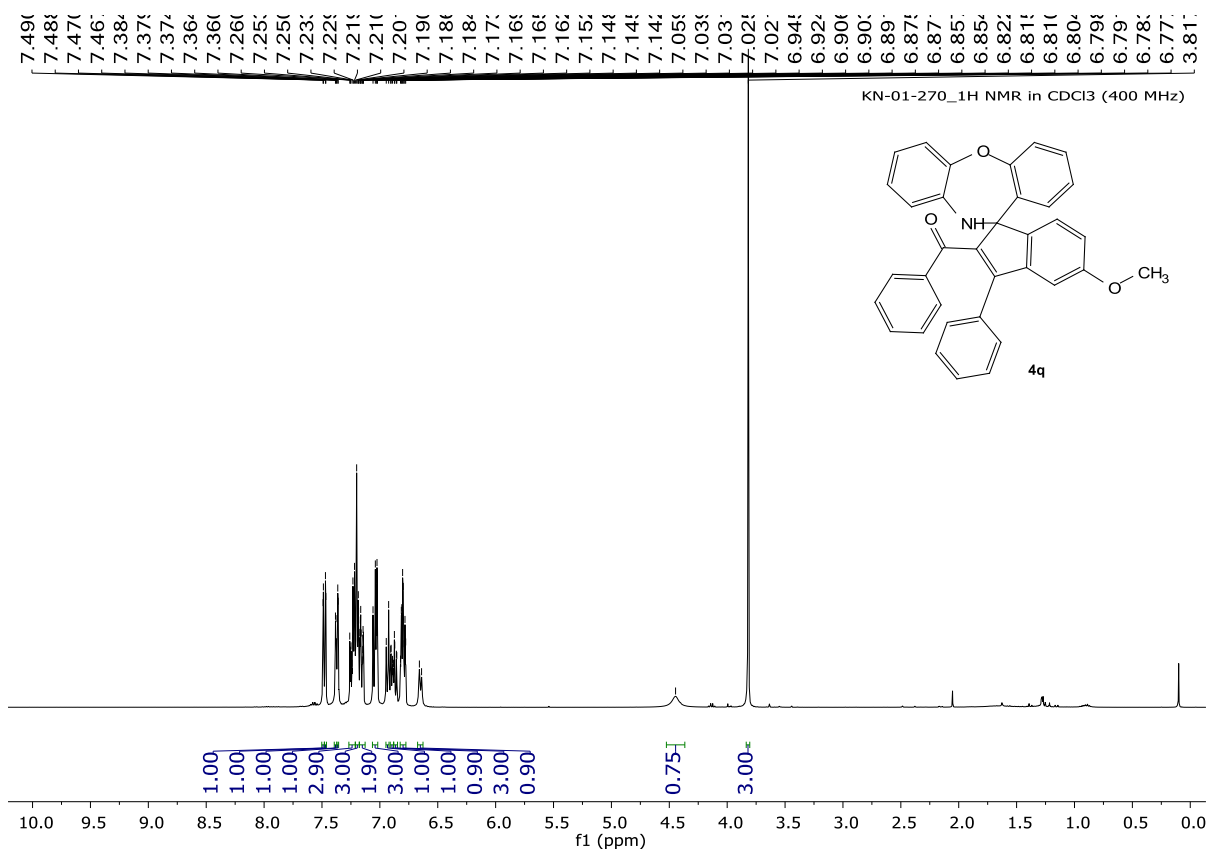

**<sup>13</sup>C NMR of 4q (100 MHz, CDCl<sub>3</sub>):**

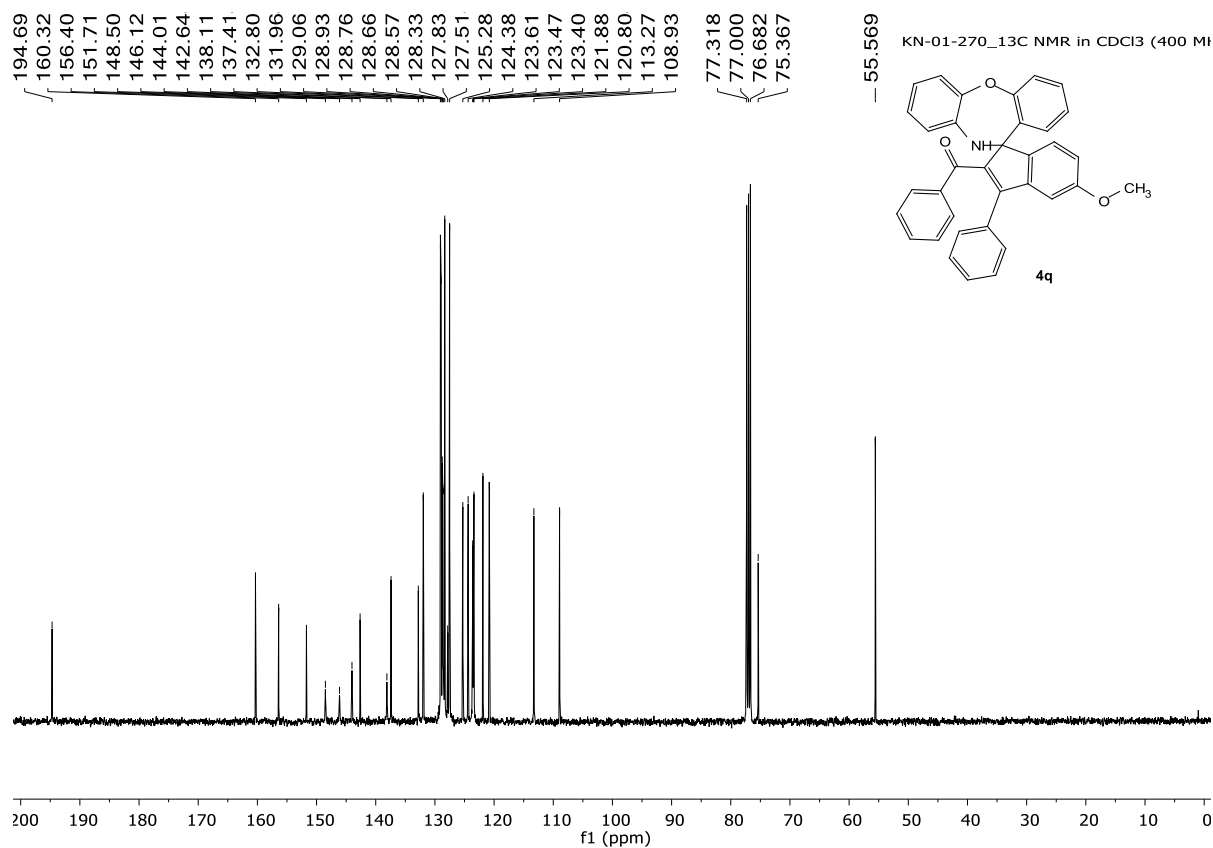

### <sup>1</sup>H NMR of 4r (400 MHz, CDCl<sub>3</sub>):

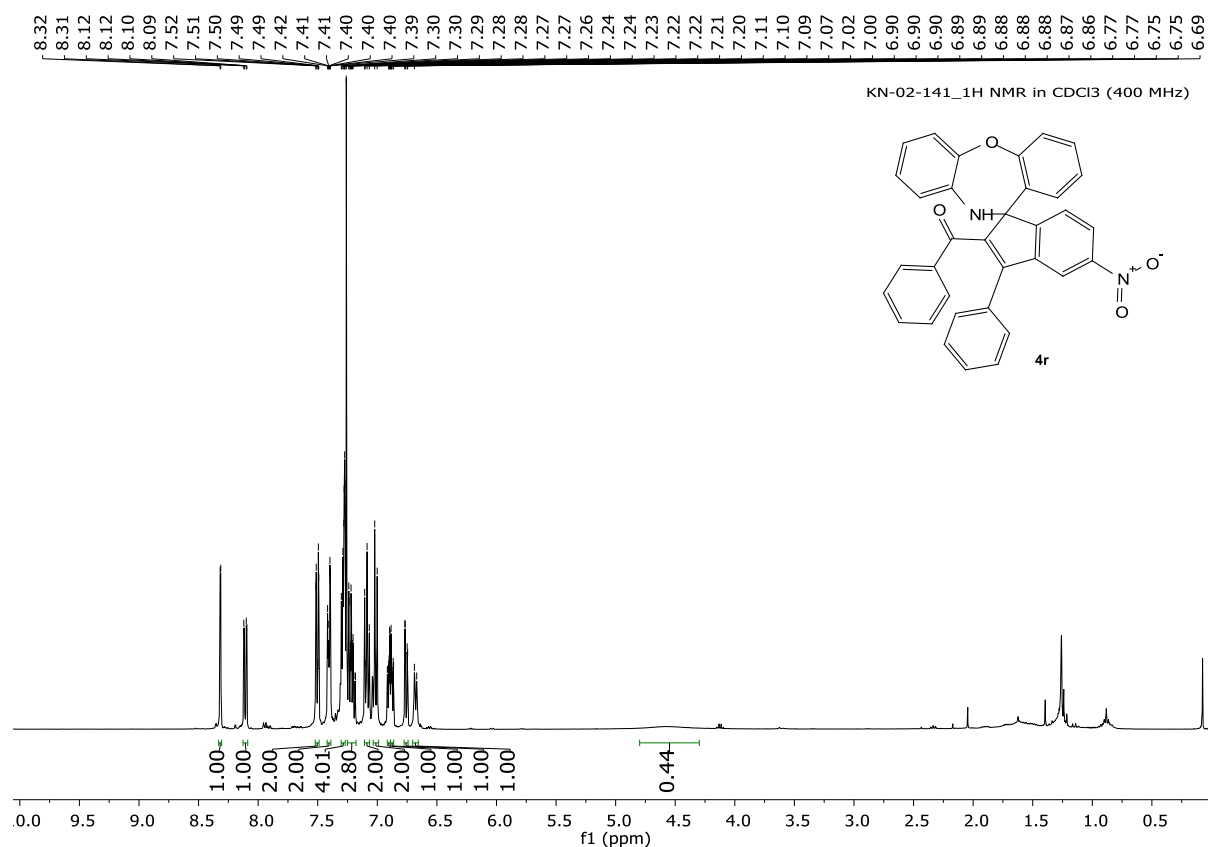

### <sup>13</sup>C NMR of 4r (100 MHz, CDCl<sub>3</sub>):

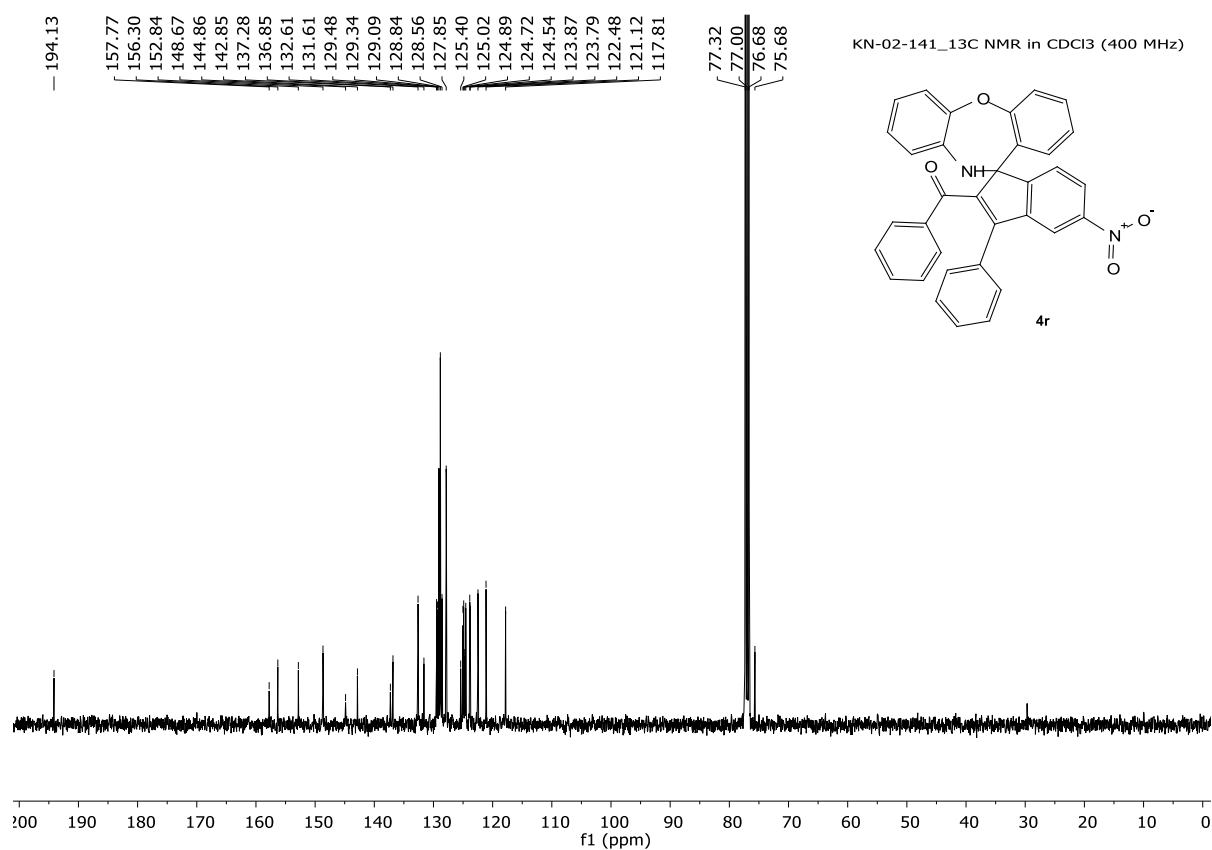

### $^1\text{H}$ NMR of 4s (400 MHz, $\text{CDCl}_3$ ):

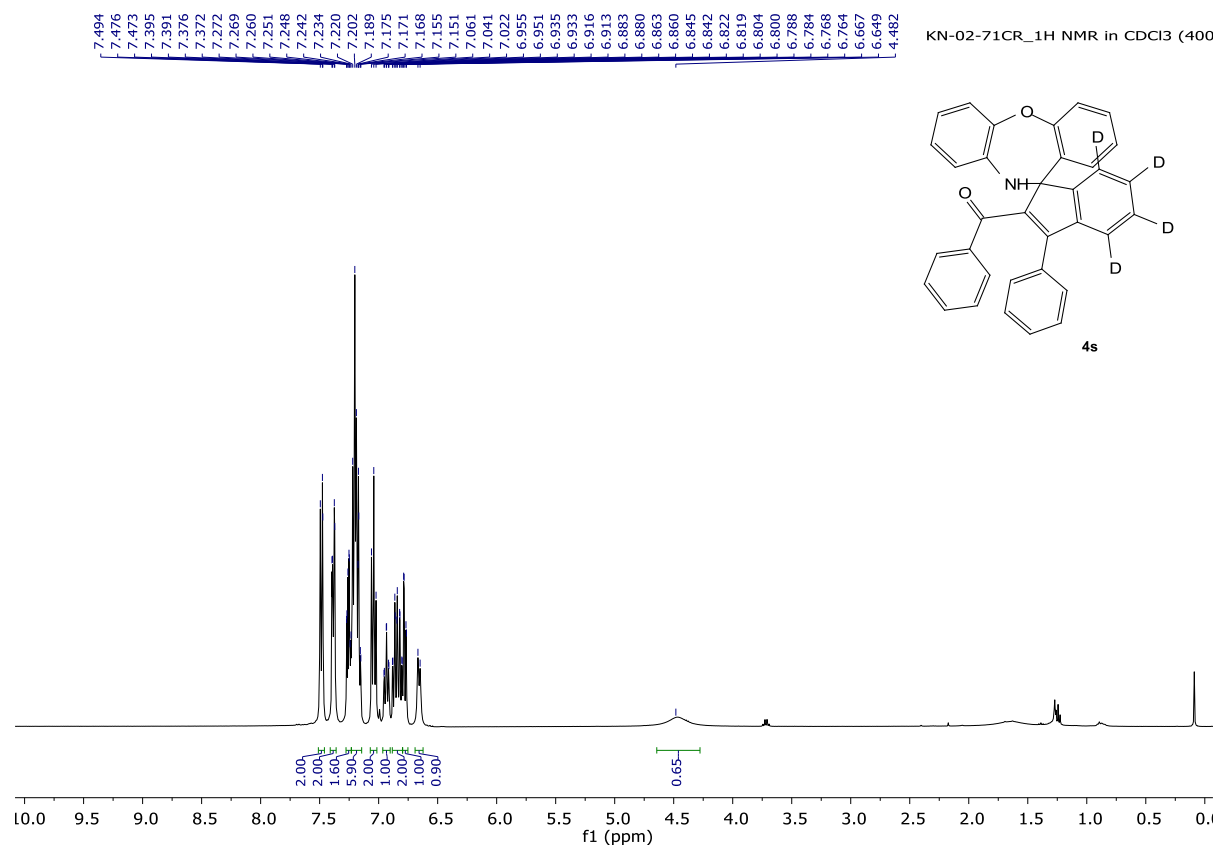

### $^{13}\text{C}$ NMR of 4s (100 MHz, $\text{CDCl}_3$ ):

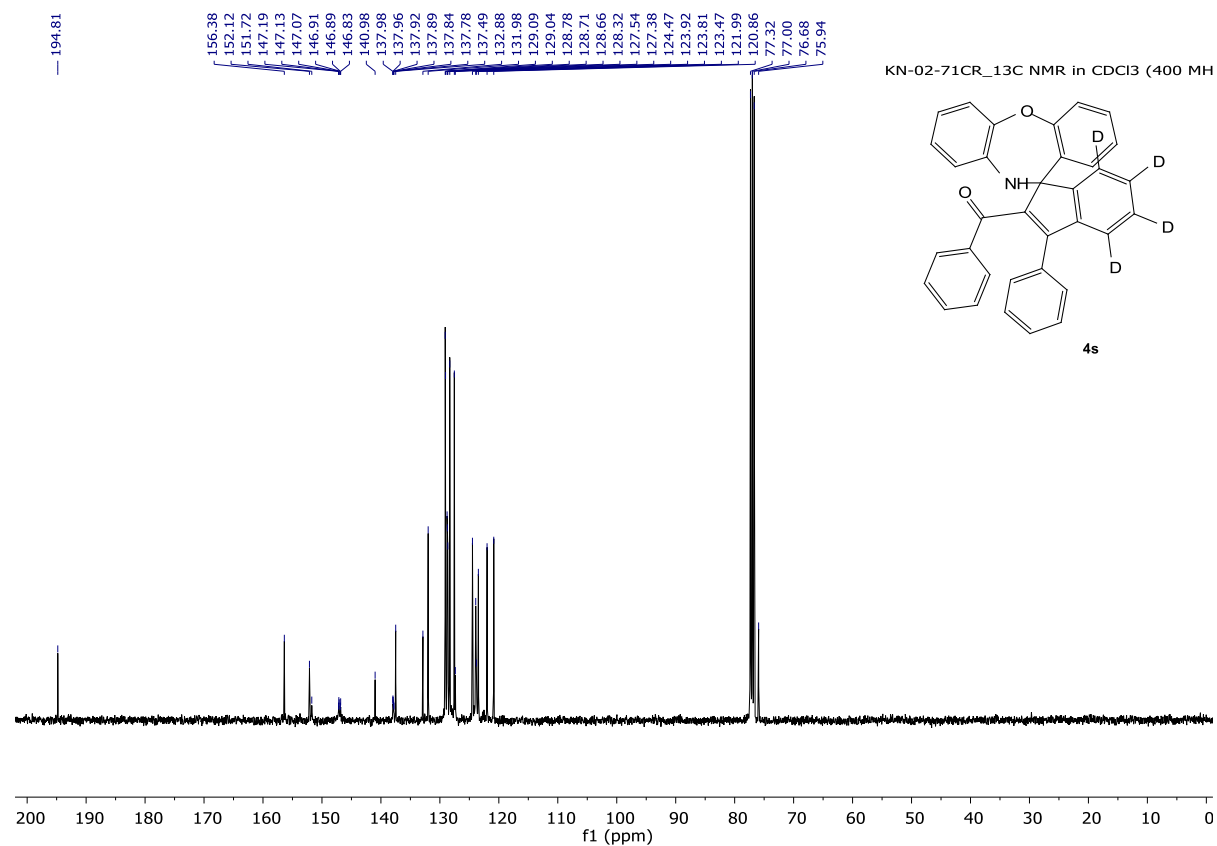

### <sup>1</sup>H NMR of 4t (400 MHz, CDCl<sub>3</sub>):

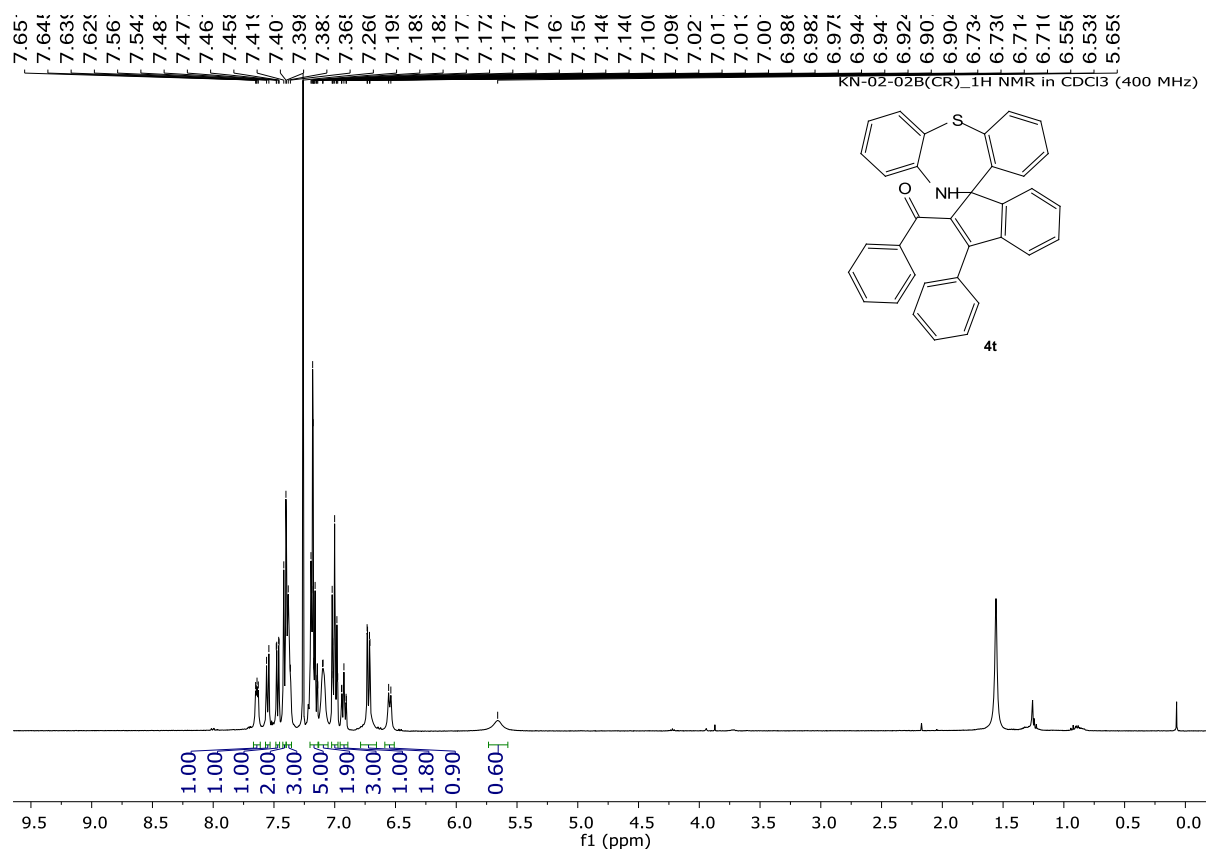

### <sup>13</sup>C NMR of 4t (100 MHz, CDCl<sub>3</sub>):

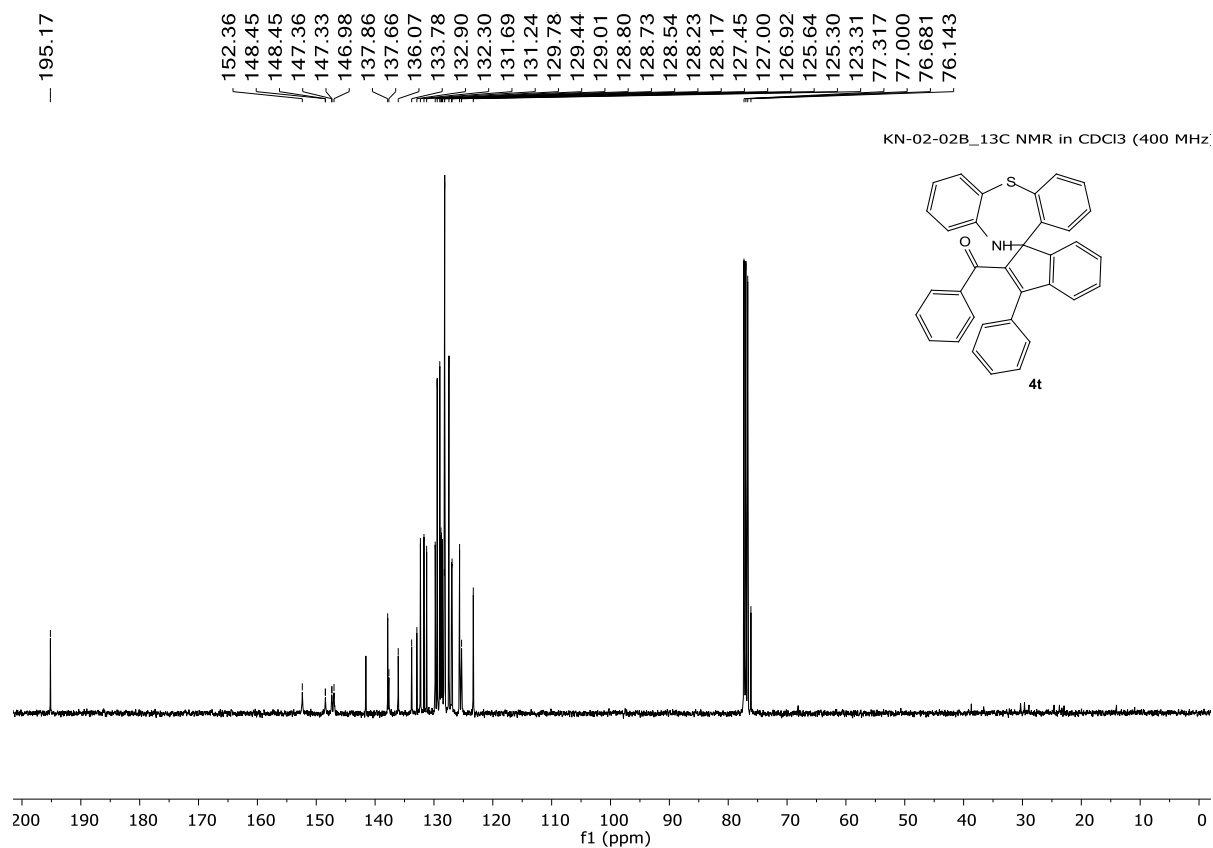

### <sup>1</sup>H NMR of 4u (400 MHz, CDCl<sub>3</sub>):

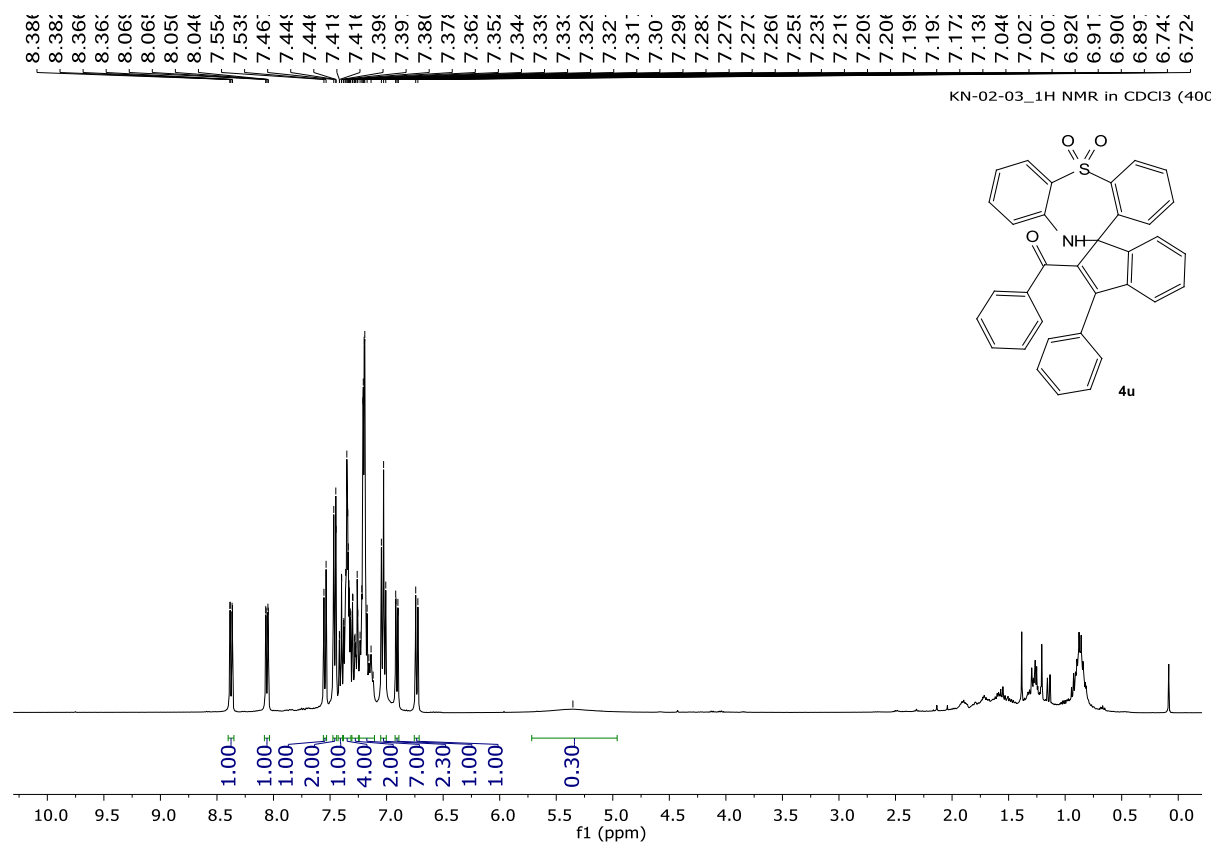

### <sup>13</sup>C NMR of 4u (100 MHz, CDCl<sub>3</sub>):

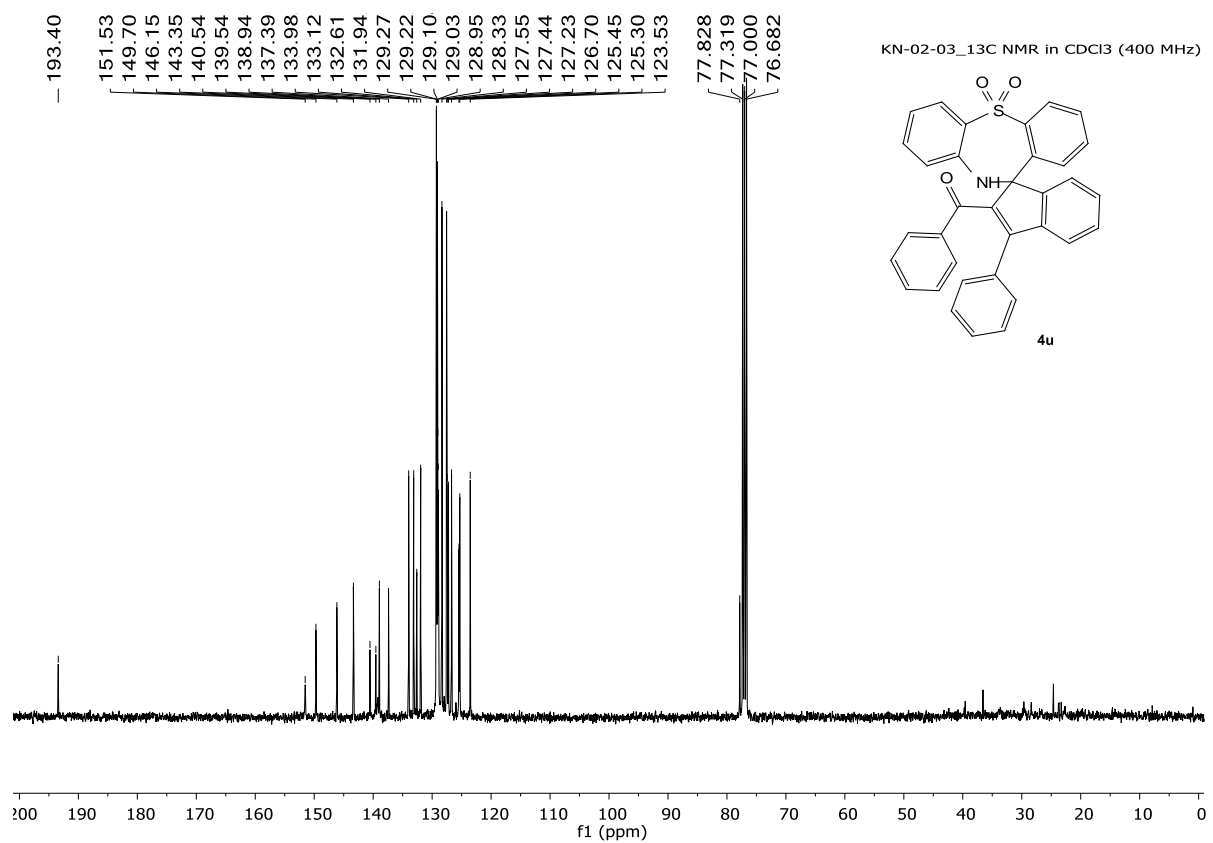

### <sup>1</sup>H NMR of 4v (400 MHz, CDCl<sub>3</sub>):

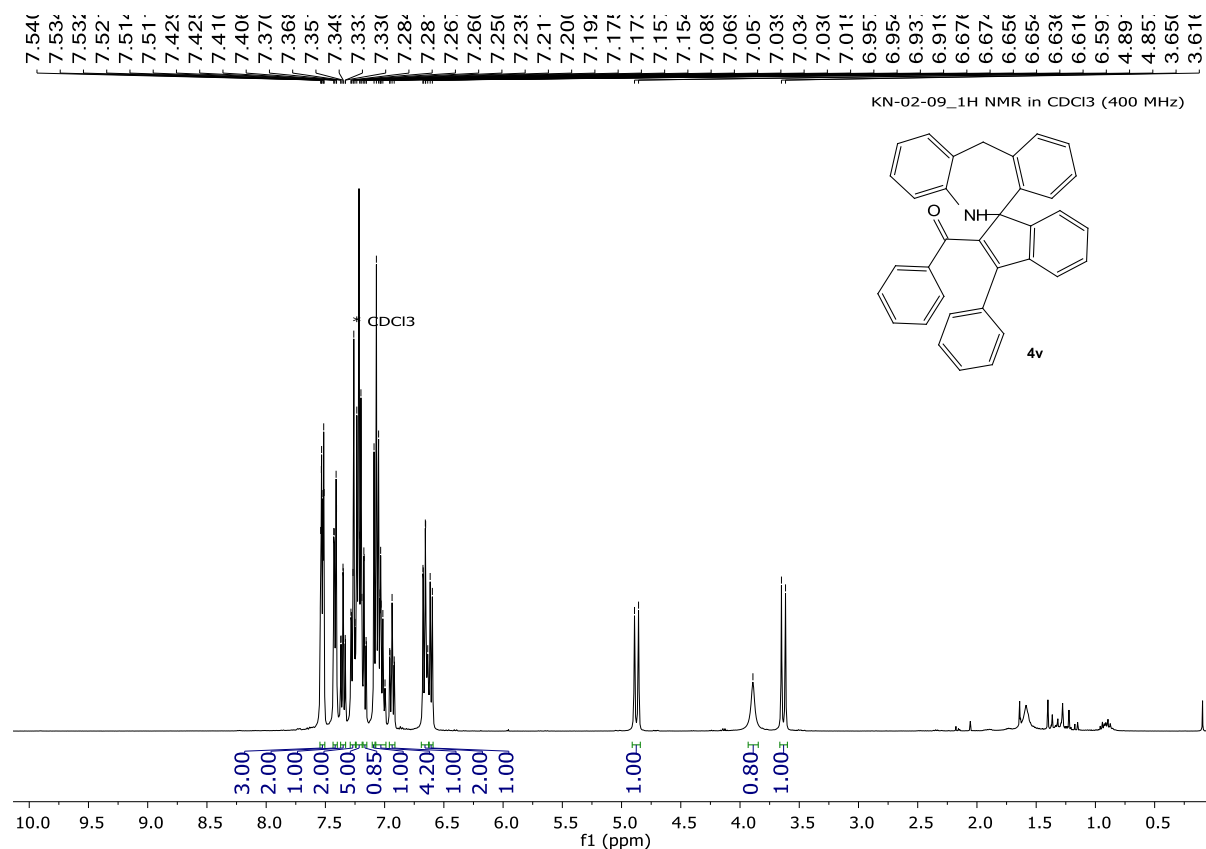

### <sup>13</sup>C NMR of 4v (100 MHz, CDCl<sub>3</sub>):

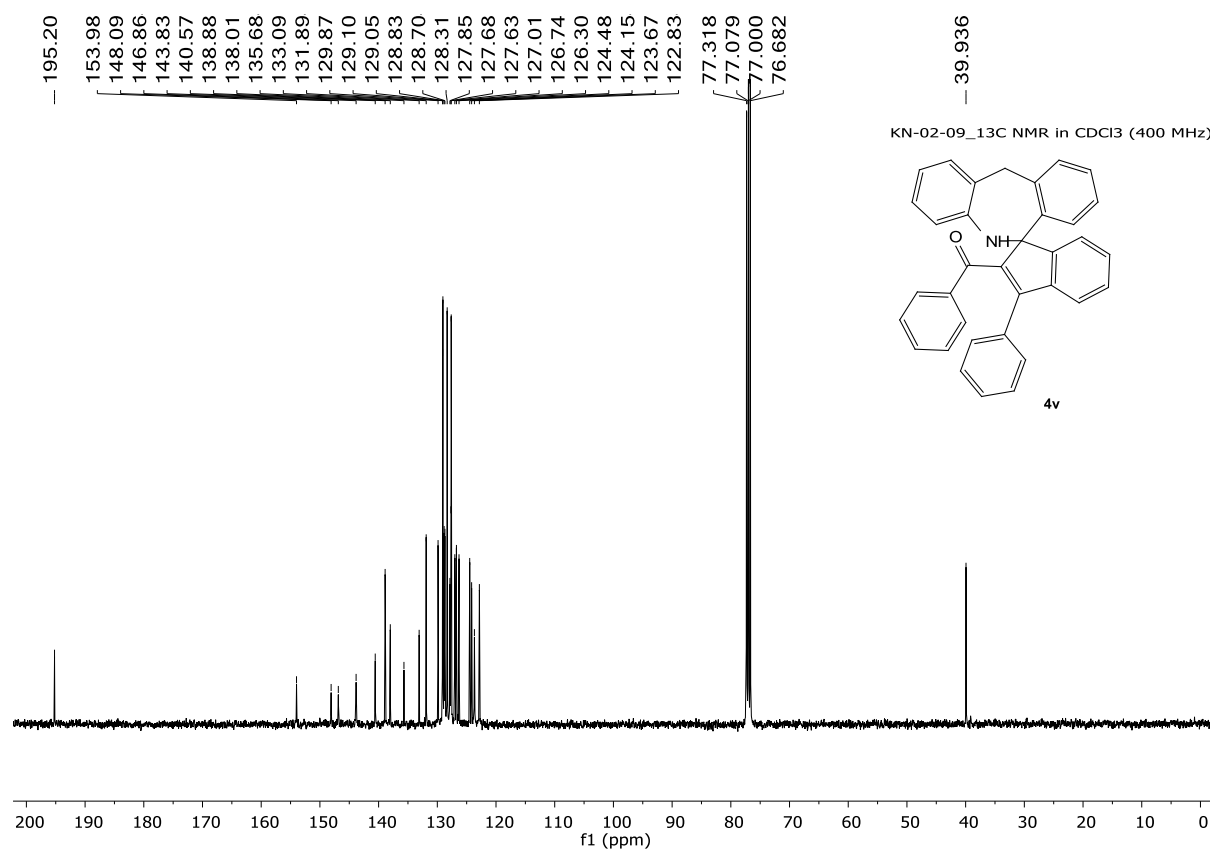

Supplement: d3cc01416a1.pdf [file d3cc01416a1.pdf]
